# Supplementary material for: An experimental and theoretical study into the facile, homogenous (N-heterocyclic carbene)2-Pd(0) catalyzed diboration of internal and terminal alkynes
Source: Royal Society of Chemistry journal article supplement (doi:10.1039/c6cy01266c), 2016-01-01
Supplement: c6cy01266c1.pdf [file c6cy01266c1.pdf]

## **-Supporting Information-**

# **An Experimental and Theoretical Study into the Facile, Homogenous (N-Heterocyclic Carbene)<sub>2</sub>-Pd(0) Catalyzed Diboration of Internal and Terminal Alkynes**

Melvyn B. Ansell,<sup>a</sup> Vitor H. Menezes da Silva,<sup>b</sup> Gabriel Heerdt,<sup>b,c</sup> Ataulpa A. C. Braga,<sup>\*b</sup> John Spencer,<sup>\*a</sup> and Oscar Navarro<sup>\*a</sup>

<sup>a</sup> Department of Chemistry, University of Sussex, Brighton, BN1 9QJ, United Kingdom

<sup>b</sup> Departamento de Química Fundamental, Instituto de Química, Universidade de São Paulo, Avenida Professor Lineu Prestes, 748, São Paulo, 05508-000, Brazil

<sup>c</sup>Instituto de Química, Universidade Estadual de Campinas, CP 6154, 13083-970 Campinas-SP, Brazil

### **Corresponding Authors**

Departamento de Química Fundamental, Universidade de São Paulo, Brazil

Email: [ataualpa@iq.usp.br](mailto:ataualpa@iq.usp.br)

Department of Chemistry, University of Sussex, Brighton, UK.

Email: [j.spencer@sussex.ac.uk](mailto:j.spencer@sussex.ac.uk); [o.navarro@sussex.ac.uk](mailto:o.navarro@sussex.ac.uk)

### **Table of Contents**

|                              |       |
|------------------------------|-------|
| General Considerations.....  | SI2   |
| Synthesis and Catalysis..... | SI3   |
| Spectroscopic Data.....      | SI12  |
| DFT Calculations.....        | SI51  |
| References.....              | SI216 |

## GENERAL CONSIDERATIONS

The manipulation of air sensitive compounds and their spectroscopic measurements were undertaken using standard Schlenk line techniques under pre-dried argon (using a BASF R3-11(G) catalyst and 4 Å molecular sieves), or in a MBraun glovebox under N<sub>2</sub> (O<sub>2</sub> < 10.0 ppm). All glassware was dried in a 160 °C oven prior to use. All solvents used for air sensitive compounds were dried by vacuum distillation followed by distillation over potassium or stored over activated 4 Å molecular sieves under an Ar atmosphere. Dried solvents were degassed and stored over argon in ampoules containing activated 4 Å molecular sieves. Deuterated benzene, C<sub>6</sub>D<sub>6</sub>, was degassed and dried by refluxing over potassium for 3 days, vacuum transferred into ampoules and stored under N<sub>2</sub>. Deuterated chloroform, CDCl<sub>3</sub>, was used as purchased (open bottle). NMR spectra were recorded on a Varian VNMRS 400 (<sup>1</sup>H 399.5 MHz; <sup>13</sup>C{<sup>1</sup>H} 100.46 MHz; <sup>29</sup>Si{<sup>1</sup>H} 79.4 MHz; <sup>11</sup>B{<sup>1</sup>H} ) or 500 (<sup>1</sup>H 499.91 MHz; <sup>13</sup>C{<sup>1</sup>H} 125.71 MHz). The spectra were referenced to the corresponding protic solvent (<sup>1</sup>H) or signals of the solvent (<sup>13</sup>C). <sup>29</sup>Si{<sup>1</sup>H} were referenced externally relative to the internal standard SiMe<sub>4</sub>. All spectra carried out on the Varian VNMRS 400 and VNMRS 500 were recorded at 303 K.

Elemental analyses were carried out at the Elemental Analysis Service, London Metropolitan University.

High resolution mass spectrometry was carried out by Dr. Alaa Abdul-Sada, University of Sussex.

## SYNTHESIS AND CATALYSIS

### Scaled Synthesis of Pd(ITMe)<sub>2</sub>(PhC≡CPh) (1)

In a vial, isopropanol (109.0  $\mu$ l, 1.42 mmol) was added to a mixture of [Pd(ITMe)(methallyl)Cl] (0.457 g, 1.42 mmol), *t*-BuOK (0.161 g, 1.44 mmol) and ITMe (0.183 g, 1.48 mmol) in toluene (80 ml). The resulting reaction mixture was stirred at room temperature under a N<sub>2</sub> for 4 h. At this point, diphenylacetylene (0.280 g, 1.57 mmol) was added and the reaction mixture was stirred for a further 18 h. At this stage the volatiles were removed *in vacuo*. Crude **1** was dissolved in CH<sub>3</sub>CN (100 ml) and filtered. The filtrates volatiles were removed under reduced pressure and yellow powdered solid was washed with a 1:1 toluene/hexane solution (3 x 20 ml) followed by pentane (3 x 20 ml). Yield: 0.407 g, 54 %. <sup>1</sup>H NMR (399.5 MHz, C<sub>6</sub>D<sub>6</sub>):  $\delta$  = 7.99 (dd, <sup>3</sup>J<sub>HH</sub> = 8.1, <sup>4</sup>J<sub>HH</sub> = 1.3 Hz, 4H, *m*-Ph), 7.27 (m, 4H, *o*-Ph), 7.05 (tt, <sup>3</sup>J<sub>HH</sub> = 7.3, <sup>4</sup>J<sub>HH</sub> = 1.3 Hz, 2H, *p*-Ph), 3.49 (s, 12H, N(1,3)-CH<sub>3</sub>), 1.54 (s, 12H, C(4,5)-CH<sub>3</sub>). <sup>13</sup>C{<sup>1</sup>H} NMR (100.46 MHz, C<sub>6</sub>D<sub>6</sub>):  $\delta$  = 198.7 (NCN), 138.6 (C≡C), 130.1 (*o*-Ph), 128.2 (*m*-Ph), 126.3 (*i*-Ph), 124.2 (*p*-Ph), 123.1 (C(4,5)-CH<sub>3</sub>), 35.2 (N(1,3)-CH<sub>3</sub>), 9.0 (C(4,5)-CH<sub>3</sub>).

### Stock Solution of 1

Stock solutions were made in batches; in a glovebox 5 mg of **1** was dissolved in 5000  $\mu$ l of C<sub>6</sub>D<sub>6</sub>.

### Synthesis of (Z)-1,2-diphenyl-1,2-bis(4,4,5,5-tetramethyl-1,3,2-dioxaborolan-2-yl)ethane (2)

A stock solution of **1** (0.47 mg, 0.78  $\mu$ mol) in C<sub>6</sub>D<sub>6</sub> (471  $\mu$ l) was added to a mixture of diphenylacetylene (0.032 g, 0.18 mmol) and bis(pinacolato)diboron (0.046 g, 0.18 mmol). The resulting reaction mixture was stirred at room temperature for 21 h under a N<sub>2</sub> atmosphere. At this point all volatiles were removed *in vacuo*. Deionized H<sub>2</sub>O (35 ml) was added and the mixture was stirred at room temperature for 24 h. Filtration and drying under reduced pressure resulted in the collection of a white powdered solid. Yield: 0.076 g, 99%. <sup>1</sup>H NMR (399.5 MHz, CDCl<sub>3</sub>):  $\delta$  = 7.05 (m, 6H, Ph), 6.95 (m, 4H, Ph), 1.32 (s, 24H, Bpin).

$^{13}\text{C}\{^1\text{H}\}$  NMR (100.46 MHz,  $\text{CDCl}_3$ ):  $\delta = 141.4, 129.5, 127.5, 125.9, 84.2, 25.0$ .  $^{11}\text{B}\{^1\text{H}\}$  NMR (128.2 MHz,  $\text{CDCl}_3$ ):  $\delta = 30.33$  (spectroscopic data in agreement with the literature).

### Synthesis of (*E*)-2,2'-(1-phenylethene-1,2-diyl)bis(4,4,5,5-tetramethyl-1,3,2-dioxaborolane) (3)

To a stock solution of **1** (0.61 mg, 1.14  $\mu\text{mol}$ ) in  $\text{C}_6\text{D}_6$  (607  $\mu\text{mol}$ ) was added to a mixture of phenylacetylene (25.0  $\mu\text{l}$ , 0.23 mmol) and bis(pinacolato)diboron (0.058 g, 0.23 mmol). The resulting reaction mixture was stirred at room temperature for 3 h under a  $\text{N}_2$  atmosphere. The volatiles were removed *in vacuo*, deionized  $\text{H}_2\text{O}$  (35 ml) was added to the crude material and the mixture was stirred for 24 h. Decanting the  $\text{H}_2\text{O}$  and drying under vacuum resulted in the isolation of a yellow oil. Yield: 0.074 g, 91 %.  $^1\text{H}$  NMR (399.5 MHz,  $\text{CDCl}_3$ ):  $\delta = 7.43$  (m, 2H, Ph), 7.28 (m, 3H, Ph), 6.28 (s, 1H, =CH), 1.37 (s, 12H, Bpin), 1.30 (s, 12H, Bpin).  $^{13}\text{C}\{^1\text{H}\}$  NMR (100.46 MHz,  $\text{CDCl}_3$ ):  $\delta = 143.2, 128.4, 127.7, 126.7, 84.3, 83.7, 25.2, 25.0$ .  $^{11}\text{B}\{^1\text{H}\}$  (128.2 MHz,  $\text{CDCl}_3$ ):  $\delta = 30.07$  (spectroscopic data in agreement with the literature).

### Synthesis of (*E*)-2,2'-(1-(*o*-tolyl)ethene-1,2-diyl)bis(4,4,5,5-tetramethyl-1,3,2-dioxaborolane) (4)

A stock solution of **1** (0.42 mg, 0.79  $\mu\text{mol}$ ) in  $\text{C}_6\text{D}_6$  (423  $\mu\text{l}$ ) was added to a mixture of 1-ethynyl-2-methylbenzene (20.0  $\mu\text{l}$ , 0.16 mmol) and bis(pinacolato)diboron (0.051 g, 0.20 mmol). The resulting reaction mixture was stirred for 2 h at room temperature under a  $\text{N}_2$  atmosphere. At this point all volatiles were removed *in vacuo*, deionized  $\text{H}_2\text{O}$  (50 ml) was then added and the mixture was stirred for 24 h. The  $\text{H}_2\text{O}$  was decanted, the resulting pale brown solid was washed with more deionized  $\text{H}_2\text{O}$  (3 x 25 ml) and dried thoroughly under a high vacuum. Yield: 0.046 g, 79 %.  $^1\text{H}$  NMR (399.5 MHz,  $\text{CDCl}_3$ ):  $\delta = 7.12$  (m, 4H, 3,4,5,6-Ph), 6.02 (s, 1H, =CH), 2.31 (s, 3H,  $\text{PhCH}_3$ ), 1.33 (s, 12H, Bpin), 1.29 (s, 12H, Bpin).  $^{13}\text{C}\{^1\text{H}\}$  NMR (100.46 MHz,  $\text{CDCl}_3$ ):  $\delta = 144.8, 134.7, 130.0, 128.1, 126.8, 125.7, 84.1, 83.7, 25.1, 25.0, 20.6$ , 2 C=C were not observed due to quadrupolar broadening caused by adjacent B atoms.  $^{11}\text{B}\{^1\text{H}\}$  NMR (128.2 MHz,  $\text{CDCl}_3$ ):  $\delta = 30.03$  (spectroscopic data in agreement with the literature).

**Synthesis of (*E*)-2,2'-(1-(4-fluorophenyl)ethene-1,2-diyl)bis(4,4,5,5-tetramethyl-1,3,2-dioxaborolane) (5)**

A stock solution of **1** (0.50 mg, 0.94  $\mu\text{mol}$ ) in  $\text{C}_6\text{D}_6$  (500  $\mu\text{l}$ ) was added to a mixture of 1-ethynyl-4-fluorobenzene (0.023 g, 0.19 mmol) and bis(pinacolato)diboron (0.048 g, 0.19 mmol). The resulting reaction mixture was stirred at room temperature for 9 h under a  $\text{N}_2$  atmosphere. At this point the volatiles were removed *in vacuo*, deionized  $\text{H}_2\text{O}$  (35 ml) was added and the resulting mixture was stirred at room temperature for 24 h. The  $\text{H}_2\text{O}$  was then decanted and the resulting yellow oil was dried under vacuum. Yield: 0.067 g, 95 %.  $^1\text{H}$  NMR (399.5 MHz,  $\text{CDCl}_3$ ):  $\delta$  = 7.41 (m, 2H, Ph), 6.98 (m, 2H, Ph), 6.24 (s, 1H, =CH), 1.37 (s, 12H, Bpin), 1.30 (s, 12H, Bpin).  $^{13}\text{C}\{^1\text{H}\}$  NMR (100.46 MHz,  $\text{CDCl}_3$ ):  $\delta$  = 162.7 (d,  $^1J_{\text{CF}}$  = 246.6 Hz, *p*-Ph), 139.2 (d,  $^4J_{\text{CF}}$  = 3.3 Hz, *i*-Ph), 128.3 (d,  $^3J_{\text{CF}}$  = 8.0 Hz, *o*-Ph), 115.3 (d,  $^2J_{\text{CF}}$  = 21.4 Hz, *m*-Ph), 84.3 (Bpin), 83.7 (Bpin), 25.2 (Bpin), 25.0 (Bpin), 2 C=C were not observed due to quadrupolar broadening caused by adjacent B atoms.  $^{11}\text{B}\{^1\text{H}\}$  NMR (128.2 MHz,  $\text{CDCl}_3$ ):  $\delta$  = 30.05.  $^{19}\text{F}$  NMR (375.9 MHz,  $\text{CDCl}_3$ ):  $\delta$  = -115.10 (m) (spectroscopic data in agreement with the literature).

**Synthesis of (*E*)-2,2'-(1-(4-methoxyphenyl)ethene-1,2-diyl)bis(4,4,5,5-tetramethyl-1,3,2-dioxaborolane) (6)**

A stock solution of **1** (0.50 mg, 0.93  $\mu\text{mol}$ ) in  $\text{C}_6\text{D}_6$  (496  $\mu\text{l}$ ) was added to a mixture of 1-ethynyl-4-methoxybenzene (0.025 g, 0.18 mmol) and bis(pinacolato)diboron (0.055 g, 0.22 mmol). The resulting reaction mixture was stirred at room temperature for 4 h under a  $\text{N}_2$  atmosphere. At this point all volatiles were removed *in vacuo*, deionized  $\text{H}_2\text{O}$  (35 ml) was then added and the mixture was stirred for 24 h. The  $\text{H}_2\text{O}$  was decanted, the resulting dark yellow oil was washed with more deionized  $\text{H}_2\text{O}$  (2 x 25ml) and dried thoroughly under a high vacuum. Yield: 0.063 g, 88 %.  $^1\text{H}$  NMR (399.5 MHz,  $\text{CDCl}_3$ ):  $\delta$  = 7.40 (m, 2H, Ph), 6.84 (m, 2H, Ph), 6.22 (s, 1H, =CH), 3.79 (s, 3H, OMe), 1.38 (s, 12H, Bpin), 1.30 (s, 12H, Bpin).  $^{13}\text{C}\{^1\text{H}\}$  NMR (100.46 MHz,  $\text{CDCl}_3$ ):  $\delta$  = 159.6, 135.6, 133.7 (C=C), 127.9, 114.1 (C=C), 113.9, 84.2, 83.6, 55.3, 25.3, 25.0.  $^{11}\text{B}\{^1\text{H}\}$  NMR (128.2 MHz,  $\text{CDCl}_3$ ):  $\delta$  = 30.43 (spectroscopic data in agreement with the literature).

### Synthesis of (*E*)-2,2'-(1-(4-(trifluoromethyl)phenyl)ethene-1,2-diyl)bis(4,4,5,5-tetramethyl-1,3,2-dioxaborolane)(7)

A stock solution of **1** (0.41 mg, 0.77  $\mu\text{mol}$ ) in  $\text{C}_6\text{D}_6$  (408  $\mu\text{l}$ ) was added to a mixture of 1-ethynyl-4-(trifluoromethyl)benzene (25.0  $\mu\text{l}$ , 0.15 mmol) and bis(pinacolato)diboron (0.055 g, 0.22 mmol). The resulting reaction mixture was stirred at room temperature for 13 h under a  $\text{N}_2$  atmosphere. At this point the volatiles were removed *in vacuo*, deionized  $\text{H}_2\text{O}$  (35 ml) was then added and the mixture was stirred for 24 h. The  $\text{H}_2\text{O}$  was then decanted and the resulting product was washed with more deionized  $\text{H}_2\text{O}$  (2 x 25 ml). The off-white solid was then dried under a high vacuum. Yield: 0.061 g, 94 %.  $^1\text{H}$  NMR (399.5 MHz,  $\text{CDCl}_3$ ):  $\delta$  = 7.55 (m, 4H, *o*- and *m*-Ph), 6.35 (s, 1H, C=CH), 1.37 (s, 12H, Bpin), 1.32 (s, 12H, Bpin).  $^{13}\text{C}\{^1\text{H}\}$  NMR (100.46 MHz,  $\text{CDCl}_3$ ):  $\delta$  = 146.9 (*i*-Ph), 129.5 (q,  $^2J_{\text{CF}}$  = 32.4 Hz, *p*-Ph), 127.0 (*o*-Ph), 125.4 (q,  $^3J_{\text{CF}}$  = 3.8 Hz, *m*-Ph), 124.4 (q,  $^1J_{\text{CF}}$  = 272.8 Hz,  $\text{CF}_3$ ), 84.5 (Bpin), 84.0 (Bpin), 25.1 (Bpin), 25.0 (Bpin), 2 C=C were not observed due to quadrupolar broadening caused by adjacent B atoms.  $^{11}\text{B}\{^1\text{H}\}$  NMR (128.2 MHz,  $\text{CDCl}_3$ ):  $\delta$  = 30.28.  $^{19}\text{F}$  NMR (375.9 MHz,  $\text{CDCl}_3$ ):  $\delta$  = -62.53 (spectroscopic data in agreement with the literature).

### Synthesis of (*E*)-2,2'-(oct-1-ene-1,2-diyl)bis(4,4,5,5-tetramethyl-1,3,2-dioxaborolane) (8)

A stock solution of **1** (0.51 mg, 0.96  $\mu\text{l}$ ) in  $\text{C}_6\text{D}_6$  (514  $\mu\text{l}$ ) was added to a mixture of 1-octyne (15.0  $\mu\text{l}$ , 0.19 mmol) and bis(pinacolato)diboron (0.055 g, 0.21 mmol). The resulting reaction mixture was stirred at room temperature for 33 h under a  $\text{N}_2$  atmosphere. At this point, the volatiles were removed *in vacuo*. The resulting crude product was stirred in deionized  $\text{H}_2\text{O}$  (30 ml) over 24 h, the  $\text{H}_2\text{O}$  was then decanted and colourless oil was dried under vacuum. Yield: 0.070 g, 87 %.  $^1\text{H}$  NMR (399.5 MHz,  $\text{CDCl}_3$ ):  $\delta$  = 5.82 (s, 1H, C=CH), 2.18 (t,  $^3J_{\text{HH}}$  = 7.6 Hz, 2H), 1.38 (m, 2H), 1.29 (s, 12H, Bpin), 1.27 (m, 6H), 1.24 (s, 12H, Bpin), 0.84 (t,  $^3J_{\text{HH}}$  = 6.9 Hz, 3H,  $\text{CH}_3$ ).  $^{13}\text{C}\{^1\text{H}\}$  NMR (100.46 MHz,  $\text{CDCl}_3$ ):  $\delta$  = 83.5, 83.2, 39.8, 31.7, 29.1, 28.6, 24.9, 24.8, 22.5, 14.0.  $^{11}\text{B}\{^1\text{H}\}$  NMR (128.2 MHz,  $\text{CDCl}_3$ ):  $\delta$  = 30.49 (spectroscopic data in agreement with the literature).

### Synthesis of (*E*)-2,2'-(1-(3,5-bis(trifluoromethyl)phenyl)ethene-1,2-diyl)bis(4,4,5,5-tetramethyl-1,3,2-dioxaborolane) (9)

A stock solution of **1** (0.38 mg, 0.71  $\mu$ l) in  $C_6D_6$  (377  $\mu$ l) was added to a mixture of 1-ethynyl-3,5-bis(trifluoromethyl)benzene (25.0  $\mu$ l, 0.14 mmol) and bis(pinacolato)diboron (0.049 g, 0.19 mmol). The resulting reaction mixture was stirred at room temperature for 48 h under a  $N_2$  atmosphere. At this point all the volatiles were removed *in vacuo*. Deionized  $H_2O$  (50 ml) was added to the reaction mixture and this was allowed to stirred for 24 h. The  $H_2O$  was decanted and the product was washed with further quantities of deionized  $H_2O$  (3 x 20 ml). The yellow oil was dried under a high vacuum. Yield: 0.055 g, 79%.  $^1H$  NMR (399.5 MHz,  $CDCl_3$ ):  $\delta$  = 7.88 (s, 2H, *o*-Ph), 7.74 (s, 1H, *p*-Ph), 6.41 (s, 1H, =CH), 1.37 (s, 12H, Bpin), 1.33 (s, 12H, Bpin).  $^{13}C\{^1H\}$  NMR (100.46 MHz,  $CDCl_3$ ):  $\delta$  = 145.3 (*i*-Ph), 131.7 (q,  $^2J_{CF}$  = 32.1 Hz, *m*-Ph), 127.0 (*o*-Ph), 123.6 (q,  $^1J_{CF}$  = 272.6 Hz,  $-CF_3$ ), 121.1 (*p*-Ph), 84.8 (Bpin), 84.22 (Bpin), 25.1 (Bpin), 25.1 (Bpin), 2 C=C were not observed due to quadrapolar broadening caused by adjacent B atoms.  $^{11}B\{^1H\}$  NMR (128.2 MHz,  $CDCl_3$ ):  $\delta$  = 30.24.  $^{19}F$  NMR (375.9 MHz,  $CDCl_3$ ):  $\delta$  = -63.12. HRMS (ESI) *m/z*: [M + Na] $^+$  Calcd for  $C_{22}H_{28}F_6O_4B_2Na$  515.1970; Found 515.1970. Elem. Anal.: Calcd for  $C_{22}H_{28}F_6O_4B_2$ : C, 53.70 %; H, 5.74 %. Found: C, 53.55 %; H, 5.67 %.

### Synthesis of (*E*)-2,2'-(1-mesitylene-1,2-diyl)bis(4,4,5,5-tetramethyl-1,3,2-dioxaborolane) (10)

A stock solution of **1** (0.51 mg, 0.96  $\mu$ mol) in  $C_6D_6$  (511  $\mu$ l) was added to a mixture of 2-ethynyl-1,3,5-trimethylbenzene (30.0  $\mu$ l, 0.19 mmol) and bis(pinacolato)diboron (0.054 g, 0.21 mmol). The reaction mixture was stirred at room temperature for 1 h under a  $N_2$  atmosphere. At this point the volatiles were removed *in vacuo*, the resulting colourless oil was washed with deionized water (3 x 30 ml) at which point a white solid precipitated. This white solid was collected by filtration and dried. Yield: 0.072 g, 94 %.  $^1H$  NMR (399.5 MHz,  $CDCl_3$ ):  $\delta$  = 6.81 (s, 2H, Ph), 5.85 (s, 1H, =CH), 2.25 (s, 3H, *p*-Ph $CH_3$ ), 2.18 (s, 6H, *o*-Ph $CH_3$ ), 1.33 (s, 12H,  $\{t\}$ Bpin), 1.24 (s, 12H, Bpin).  $^{13}C\{^1H\}$  NMR (100.46 MHz,  $CDCl_3$ ):  $\delta$  = 141.6 (s, *i*-Ph), 135.1 (s, *p*-Ph), 134.5 (s, *o*-Ph), 128.0 (s, *m*-Ph), 83.7 (s, Bpin), 83.4 (s,  $\{t\}$ Bpin), 25.1 (s,

{*t*}Bpin), 24.9 (s, Bpin), 21.1 (s, *p*-PhCH<sub>3</sub>), 20.8 (s, *o*-PhCH<sub>3</sub>), 2 C=C were not observed due to quadrupolar broadening caused by adjacent B atoms. <sup>11</sup>B{<sup>1</sup>H} NMR (128.2 MHz, CDCl<sub>3</sub>): δ = 29.71. HRMS (ESI) m/z: [M + Na]<sup>+</sup> Calcd for C<sub>23</sub>H<sub>36</sub>O<sub>4</sub>B<sub>2</sub>Na 421.2692; Found 421.2695. Elem. Anal.: Calcd for C<sub>23</sub>H<sub>36</sub>O<sub>4</sub>B<sub>2</sub>: C, 69.38 %; H, 9.11 %. Found: C, 69.29 %; H, 9.16 %.

### Synthesis of (*E*)-2,2'-(1-(cyclohex-1-en-1-yl)ethene-1,2-diyl)bis(4,4,5,5-tetramethyl-1,3,2-dioxaborolane) (11)

A stock solution of Pd(ITMe)<sub>2</sub>(PhC≡CPh) (0.34 mg, 0.64 μmol) in C<sub>6</sub>D<sub>6</sub> (340 μl) was added to a mixture of 1-ethynylcyclohex-1-ene (15.0 μl, 0.13 mmol) and bis(pinacolato)diboron (0.039 g, 0.15 mmol). The resulting reaction mixture was stirred at room temperature for 24 h under a N<sub>2</sub> atmosphere. At this point all volatiles were removed *in vacuo*, deionized H<sub>2</sub>O (35 ml) was added and the resulting mixture was stirred at room temperature for 24 h. At this point the beige solid was collected by filtration and dried under a high vacuum. Yield: 0.041 g, 89 %. <sup>1</sup>H NMR (399.5 MHz, C<sub>6</sub>D<sub>6</sub>): δ = 6.30 (m, 1H, =CHCH<sub>2</sub>), 6.26 (s, 1H, =CH), 2.16 (m, 2H, {2}-CH<sub>2</sub>), 2.05 (m, 2H, {5}-CH<sub>2</sub>), 1.45 (m, 2H, CH<sub>2</sub>), 1.36 (m, 2H, CH<sub>2</sub>), 1.31 (s, 12H, cyclohexen-1-yl{Bpin}C=), 1.11 (s, 12H, =C{Bpin}H). <sup>13</sup>C{<sup>1</sup>H} NMR (100.46 MHz, C<sub>6</sub>D<sub>6</sub>): δ = 140.8 ({1}cyclohexen-1-yl), 131.2 ({6}-cyclohexen-1-yl), 83.6 (cyclohexen-1-yl{Bpin}C=), 83.1 (=C{Bpin}H), 26.7 ({5}-cyclohexen-1-yl), 25.6 (cyclohexen-1-yl{Bpin}C=), 25.5 ({2}-cyclohexen-1-yl), 25.0 (=C{Bpin}H), 23.1 (cyclohexen-1-yl), 22.6 (cyclohexen-1-yl), 2 C=C were not observed due to quadrupolar broadening caused by adjacent B atoms. <sup>11</sup>B{<sup>1</sup>H} NMR (128.2 MHz, C<sub>6</sub>D<sub>6</sub>): δ = 30.86. HRMS (ESI) m/z: [M + Na]<sup>+</sup> Calcd for C<sub>20</sub>H<sub>34</sub>O<sub>4</sub>B<sub>2</sub>Na 383.2535; Found 383.2526. Elem. Anal.: Calcd for C<sub>20</sub>H<sub>34</sub>O<sub>4</sub>B<sub>2</sub>: C, 66.71 %; H, 9.52 %. Found: C, 66.79 %; H, 9.43 %.

### Synthesis of (*Z*)-2,2'-(1-(4-ethylphenyl)-2-(4-methoxyphenyl)ethene-1,2-diyl)bis(4,4,5,5-tetramethyl-1,3,2-dioxaborolane) (12)

A stock solution of **1** (0.35 mg, 0.66 μmol) in C<sub>6</sub>D<sub>6</sub> (354 μl) was added to a mixture of 1-ethyl-4-((4-methoxyphenyl)ethynyl)benzene (0.031 g, 0.13 mmol) and bis(pinacolato)diboron (0.043 g, 0.17 mmol).



The resulting reaction mixture was heated to 50 °C for 5 h under a N<sub>2</sub> atmosphere. Upon cooling the reaction mixture the volatiles were removed *in vacuo*. Deionized H<sub>2</sub>O (35 ml) was added to the resulting off-white solid and this was stirred at room temperature for 24 h. The white solid was collected by filtration and dried under a high vacuum. Yield: 0.055 g, 85 %. <sup>1</sup>H NMR (399.5 MHz, CDCl<sub>3</sub>): δ = 6.88 (m, 6H, *o,m*-Ph{4-Et} and *o*-Ph{4-OMe}), 6.61 (m, 2H, *m*-Ph(4-OMe)), 3.71 (s, 3H, OMe), 2.53 (q, <sup>3</sup>J<sub>HH</sub> = 7.7 Hz, 2H, CH<sub>2</sub>CH<sub>3</sub>), 1.32 (s, 12H, BPin), 1.32 (s, 12H, Bpin), 1.16 (t, <sup>3</sup>J<sub>HH</sub> = 7.7 Hz, 3H, CH<sub>2</sub>CH<sub>3</sub>). <sup>1</sup>H NMR (499.5 MHz, C<sub>6</sub>D<sub>6</sub>): δ = 7.30 (d, <sup>3</sup>J<sub>HH</sub> = 8.2 Hz, 2H, *o*-Ph{4-Et}), 7.26 (d, <sup>3</sup>J<sub>HH</sub> = 8.7 Hz, 2H, *o*-Ph{4-OMe}), 6.90 (d, <sup>3</sup>J<sub>HH</sub> = 8.2 Hz, 2H, *m*-Ph{4-Et}), 6.60 (d, <sup>3</sup>J<sub>HH</sub> = 8.7 Hz, *m*-Ph{4-OMe}), 3.14 (s, 3H, OMe), 2.32 (q, <sup>3</sup>J<sub>HH</sub> = 7.6 Hz, 2 H, CH<sub>2</sub>CH<sub>3</sub>), 1.19 (s, 12H, Bpin), 1.18 (s, 12H, Bpin), 0.95 (t, <sup>3</sup>J<sub>HH</sub> = 7.6 Hz, 3H, CH<sub>2</sub>CH<sub>3</sub>). <sup>13</sup>C{<sup>1</sup>H} NMR (100.46 MHz, CDCl<sub>3</sub>): δ = 157.8 (*p*-Ph{4-OMe}), 141.5 (*p*-Ph{4-Et}), 138.8 (*i*-Ph{4-Et}), 134.0 (*i*-Ph{4-OMe}), 130.7 (*o*-Ph{4-OMe}), 129.5 (*o*-Ph{4-Et}), 127.1 (*m*-Ph{4-Et}), 113.1 (*m*-Ph{4-OMe}), 84.1 (Bpin), 84.1 (Bpin), 55.1 (OMe), 28.6 (CH<sub>2</sub>CH<sub>3</sub>), 25.1 (Bpin), 25.1 (Bpin), 15.3 (CH<sub>2</sub>CH<sub>3</sub>), 2 C=C were not observed due to quadrapolar broadening caused by adjacent B atoms. <sup>13</sup>C{<sup>1</sup>H} NMR (100.46 MHz, C<sub>6</sub>D<sub>6</sub>): δ = 158.4 (*p*-Ph{4-OMe}), 141.6 (*p*-Ph{4-Et}), 140.0 (*i*-Ph{4-Et}), 134.7 (*i*-Ph{4-OMe}), 131.1 (*o*-Ph{4-OMe}), 130.0 (*o*-Ph{4-Et}), 127.6 (*m*-Ph{4-Et}), 113.7 (*m*-Ph{4-OMe}), 83.8 (Bpin), 83.8 (Bpin), 54.5 (OMe), 28.8 (CH<sub>2</sub>CH<sub>3</sub>), 25.1 (Bpin), 25.1 (Bpin), 15.3 (CH<sub>2</sub>CH<sub>3</sub>), 2 C=C were not observed due to quadrapolar broadening caused by adjacent B atoms. <sup>11</sup>B{<sup>1</sup>H} NMR (128.2 MHz, CDCl<sub>3</sub>): 30.77. <sup>11</sup>B{<sup>1</sup>H} NMR (128.2 MHz, C<sub>6</sub>D<sub>6</sub>): δ = 30.77. HRMS (ESI) m/z: [M + H]<sup>+</sup> Calcd for C<sub>29</sub>H<sub>40</sub>O<sub>5</sub>B<sub>2</sub>H 491.3135; Found 491.3132. Elem. Anal.: Calcd for C<sub>29</sub>H<sub>40</sub>O<sub>5</sub>B<sub>2</sub>: C, 71.05 %; H, 8.22 %. Found: C, 70.94 %; H, 8.26 %.

### Synthesis of (*Z*)-2,2'-(1-(naphthalen-1-yl)-2-phenylethene-1,2-diyl)bis(4,4,5,5-tetramethyl-1,3,2-dioxaborolane) (13)

A stock solution of **1** (0.39 mg, 0.72 μmol) in C<sub>6</sub>D<sub>6</sub> (385 μl) was added to a mixture of 1-(phenylethynyl)naphthalene (0.033 g, 0.14 mmol) and bis(pinacolato)diboron (0.049 g, 0.19 mmol). The resulting reaction mixture was heated to 50 °C for 24 h under a N<sub>2</sub> atmosphere. At this point all volatiles

were removed *in vacuo*, deionized H<sub>2</sub>O (30 ml) was added and the reaction mixture was stirred for 24 h. The H<sub>2</sub>O was removed and the off-white powdered solid was dried under high vacuum. Yield: 0.070 g, 94 %. <sup>1</sup>H NMR (399.5 MHz, CDCl<sub>3</sub>): δ = 7.97 (m, 1H, naphth), 7.70 (m, 1H, naphth), 7.54 (m, 1H, naphth), 7.35 (m, 1H, naphth), 7.35 (m, 1H, naphth), 7.17 (m, 1H, naphth), 6.95 (m, 1H, naphth), 6.86 (m, 5H, Ph), 1.37 (s, 6H, Bpin), 1.35 (s, 6H, Bpin), 1.21 (s, 6H, Bpin), 1.20 (s, 6H, Bpin). <sup>13</sup>C{<sup>1</sup>H} NMR (100.46 MHz, CDCl<sub>3</sub>): δ = 141.6, 140.1, 133.3, 132.2, 128.3, 128.1, 127.4, 126.9, 126.6, 126.3, 126.0, 125.4, 125.4, 125.1, 84.3, 84.2, 25.3, 24.9, 24.9, 24.8. <sup>11</sup>B{<sup>1</sup>H} NMR (128.2 MHz, CDCl<sub>3</sub>): δ = 30.71. HRMS (ESI) m/z Calcd for C<sub>30</sub>H<sub>36</sub>O<sub>4</sub>B<sub>2</sub>H 483.2872; Found 483.2871. Elem. Anal.: Calcd for C<sub>30</sub>H<sub>36</sub>O<sub>4</sub>B<sub>2</sub>: C, 74.72 %; H, 7.52 %. Found: C, 74.63 %; H, 7.46 %.

### Synthesis of (Z)-trimethyl(2-phenyl-1,2-bis(4,4,5,5-tetramethyl-1,3,2-dioxaborolan-2-yl)vinyl)silane (14)

A stock solution of **1** (0.002 g, 3.06 μmol) in C<sub>6</sub>D<sub>6</sub> (406 μl) was added to a mixture of trimethyl(phenylethynyl)silane (30.0 μl, 0.15 mmol) and bis(pinacolato)diboron (0.042 g, 0.17 mmol). The resulting reaction mixture was heated to 100 °C for 30 h under a N<sub>2</sub> atmosphere. Upon cooling the reaction mixture the volatiles were removed *in vacuo*. At this point all volatiles were removed *in vacuo*, deionized H<sub>2</sub>O (30 ml) was added and the reaction mixture was stirred for 24 h. The H<sub>2</sub>O was removed and the off-white powdered solid was dried under high vacuum. Yield: 0.056 g, 85 %. <sup>1</sup>H NMR (399.5 MHz, CDCl<sub>3</sub>): δ = 7.21 (m, 3H, *m,p*-Ph), 7.11 (m, 2H, *o*-Ph), 1.37 (s, 12H, Bpin), 1.22 (s, 12H, Bpin), -0.18 (s, 9H, SiMe<sub>3</sub>). <sup>13</sup>C{<sup>1</sup>H} NMR (100.46 MHz, CDCl<sub>3</sub>): δ = 146.0 (*i*-Ph), 128.0 (*o*-Ph), 127.6 (*m*-Ph), 126.3 (*p*-Ph), 84.1 (Bpin), 83.8 (Bpin), 25.7 (Bpin), 24.9 (Bpin), 1.0 (SiMe<sub>3</sub>), 2 C=C were not observed due to quadrupolar broadening caused by adjacent B atoms.. <sup>11</sup>B{<sup>1</sup>H} NMR (128.2 MHz, CDCl<sub>3</sub>): δ = 30.80, 29.12. <sup>29</sup>Si{<sup>1</sup>H} (79.4 MHz, CDCl<sub>3</sub>): δ = -7.43 (spectroscopic data in agreement with the literature).

### Synthesis of (Z)-2,2'-(oct-4-ene-4,5-diyl)bis(4,4,5,5-tetramethyl-1,3,2-dioxaborolane) (15)

A stock solution of **1** (0.45 mg, 0.85  $\mu$ l) in  $C_6D_6$  (454  $\mu$ l) was added to a mixture of 4-octyne (25.0  $\mu$ l, 0.17 mmol) and bis(pinacolato)diboron (0.045 g, 0.18 mmol). The resulting reaction mixture was stirred at room temperature for 23 h under a  $N_2$  atmosphere. At this point no further conversion was observed (39 % conversion). At this point all volatiles were removed *in vacuo*. The resulting off-white oily solid was stirred in deionized  $H_2O$  (35 ml) for 24 h. The  $H_2O$  was then decanted and the product was washed with a further quantities of deionized  $H_2O$  (3 x 25 ml). The resulting colourless oil was dried under a high vacuum. Yield: 0.012 g, 20 % (39 % conversion).  $^1H$  NMR (499.5 MHz,  $CDCl_3$ ):  $\delta$  = 2.17 (m, 4H), 1.37 (m, 4H), 1.28 (s, 24H, Bpin), 0.91 (t,  $^3J_{HH}$  = 7.4 Hz, 6H,  $CH_3$ ).  $^{13}C\{^1H\}$  (100.46 MHz,  $CDCl_3$ ):  $\delta$  = 83.4, 33.2, 25.1, 23.2, 14.7, 2  $C=C$  were not observed due to quadrupolar broadening caused by adjacent B atoms.  $^{11}B\{^1H\}$  NMR (128.2 MHz,  $CDCl_3$ ):  $\delta$  = 30.64 (spectroscopic data in agreement with the literature).

### SPECTROSCOPIC DATA $Pd(ITMe)_2(PhC\equiv CPh)$ (**1**)

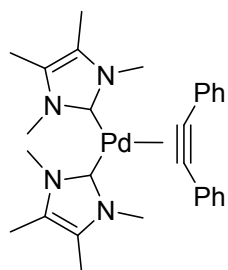

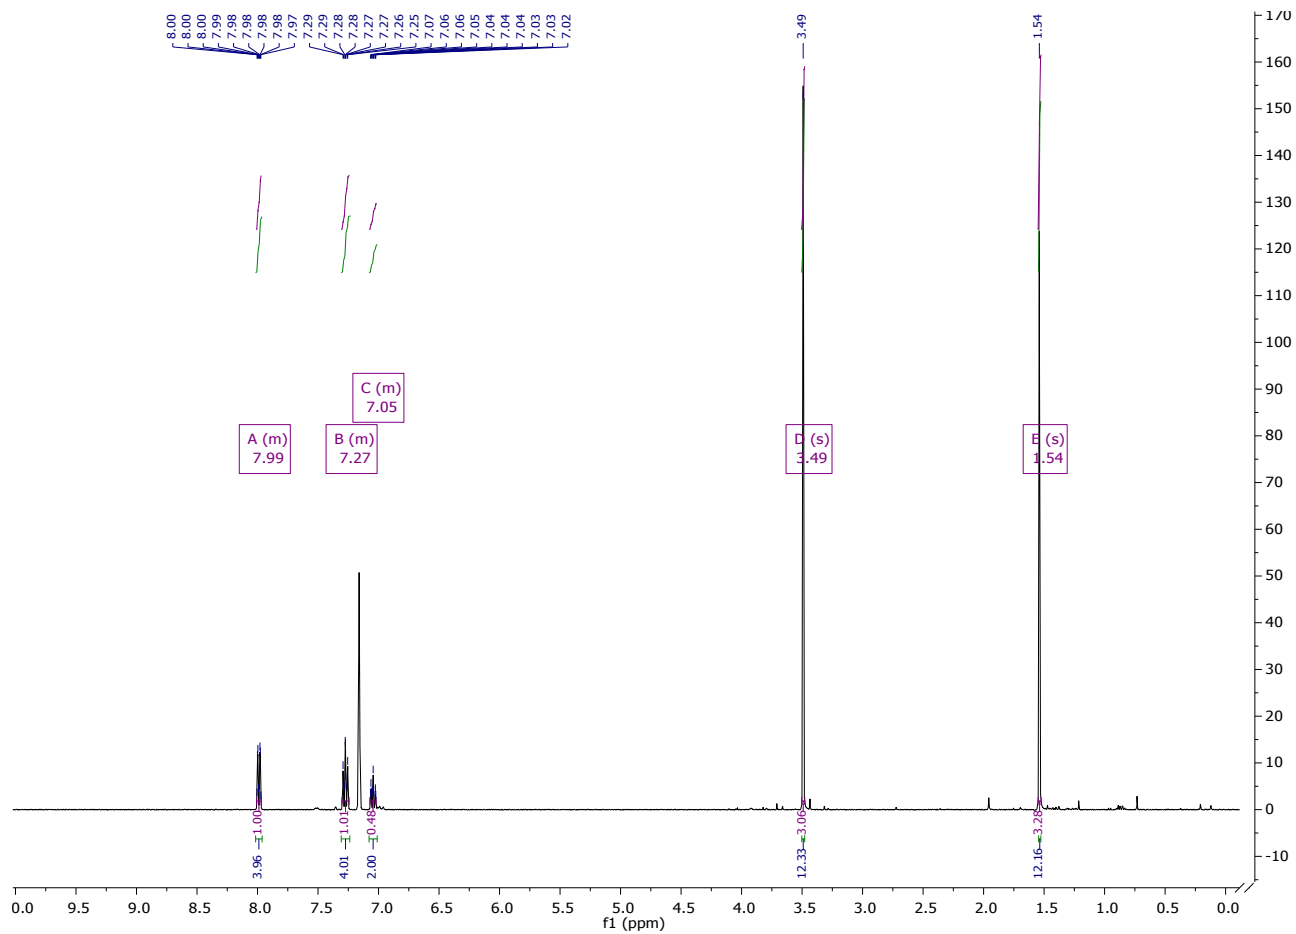

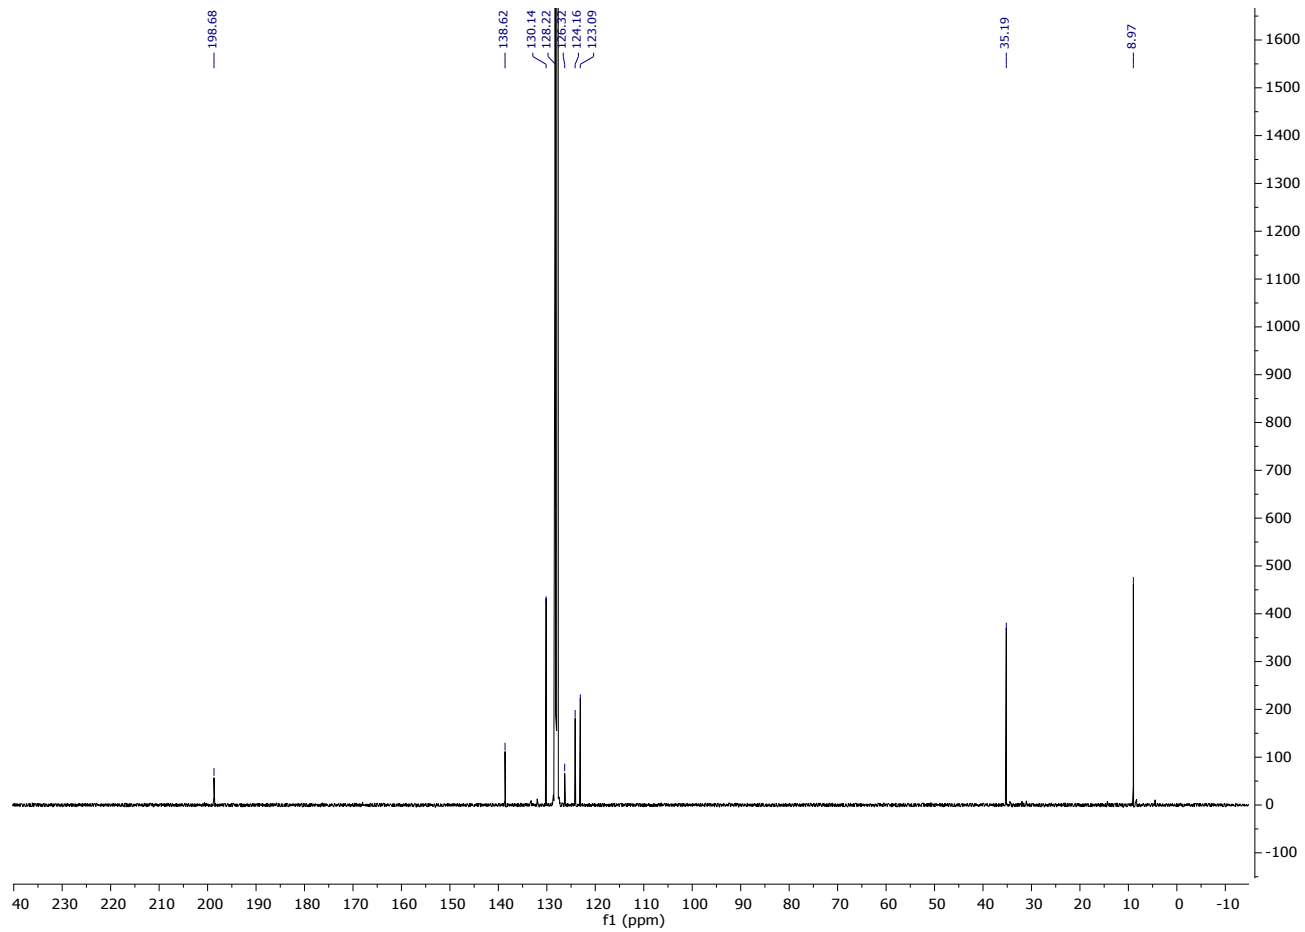

# Synthesis of (Z)-1,2-diphenyl-1,2-bis(4,4,5,5-tetramethyl-1,3,2-dioxaborolan-2-yl)ethane (2)

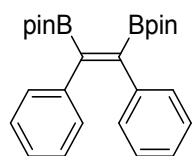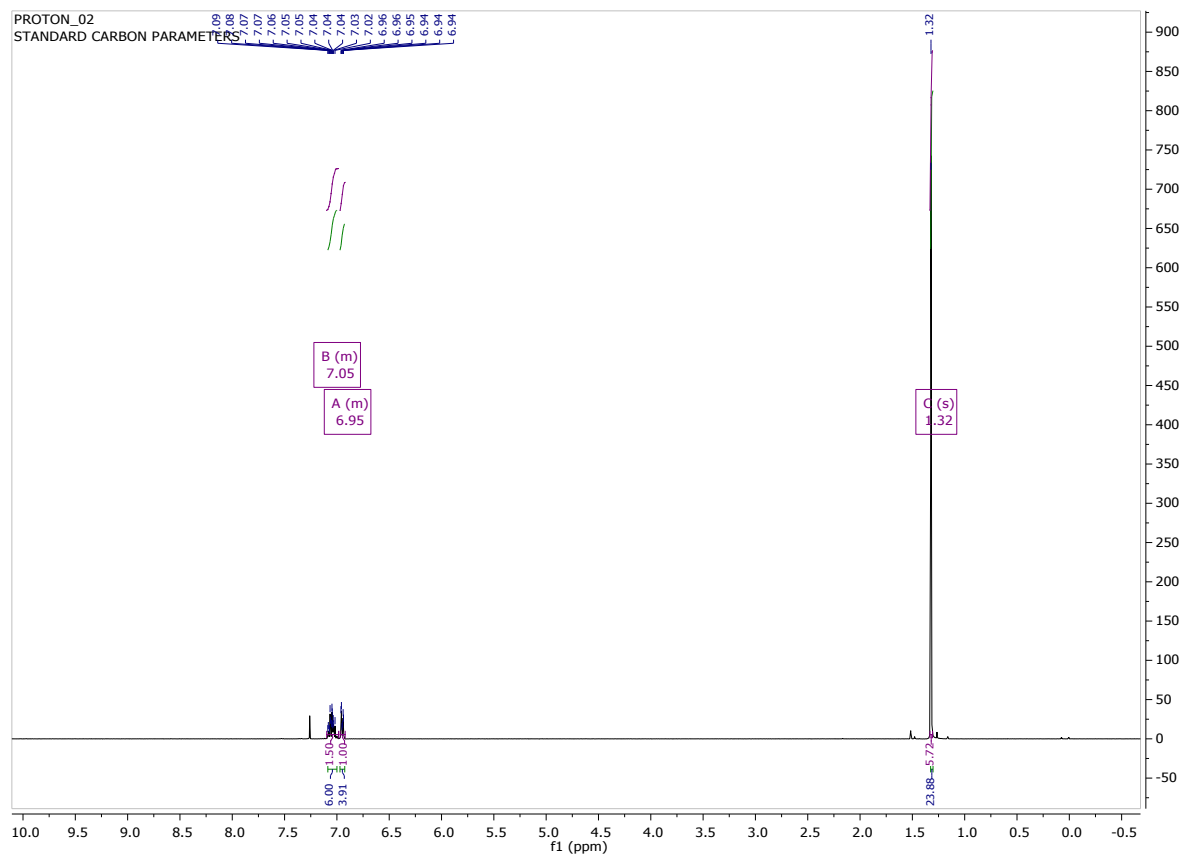

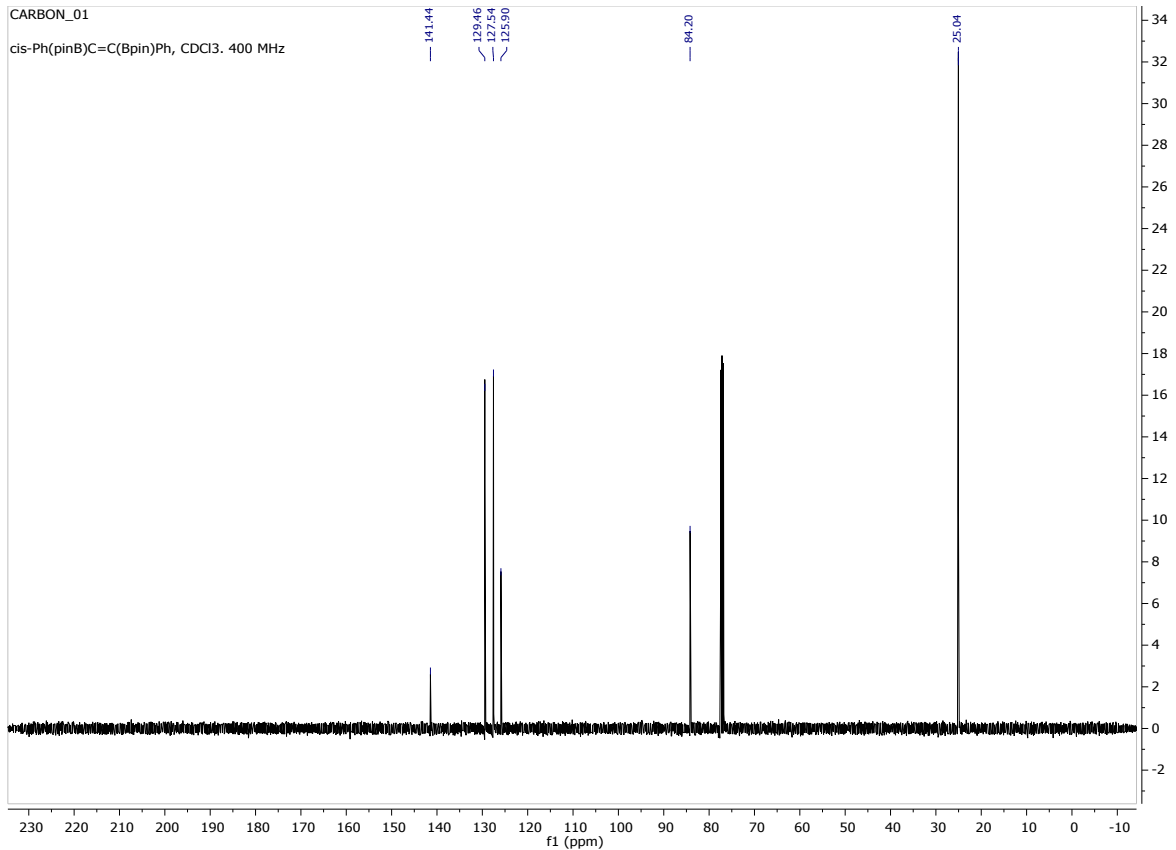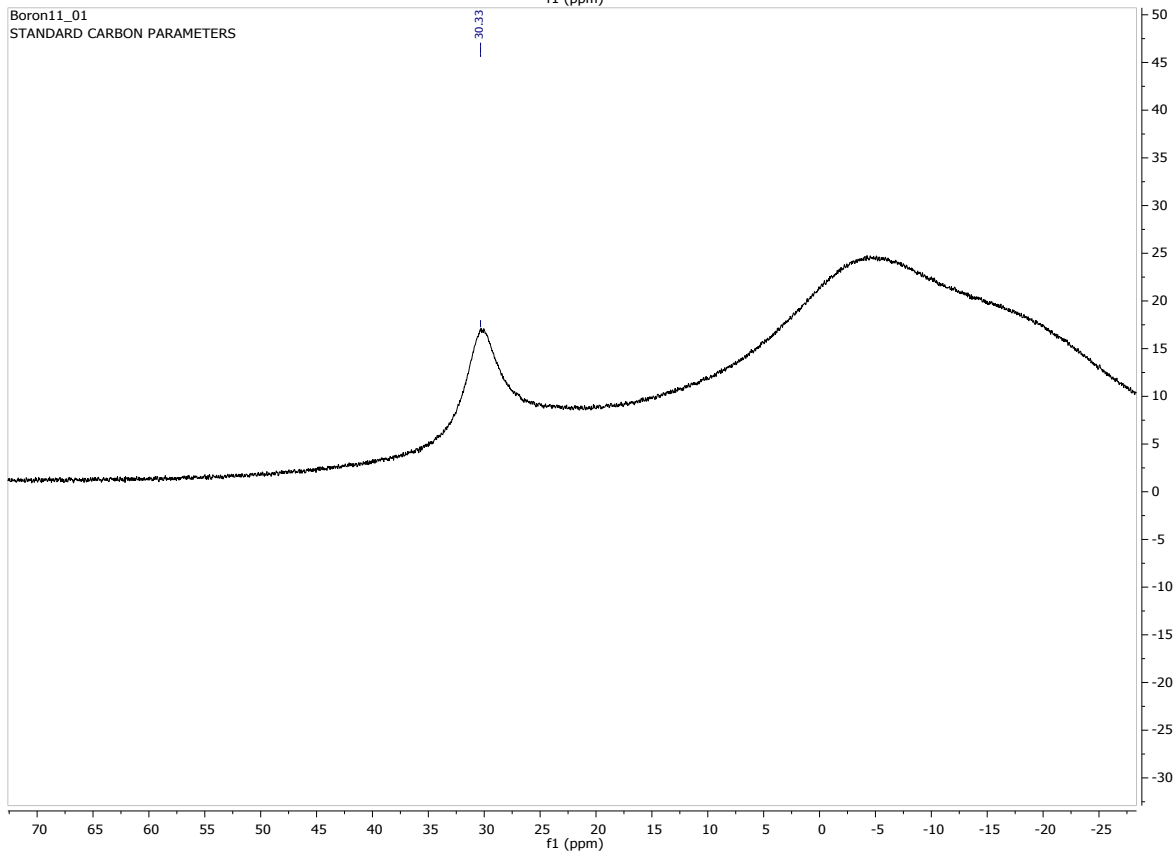

**(E)-2,2'-(1-phenylethene-1,2-diyl)bis(4,4,5,5-tetramethyl-1,3,2-dioxaborolane) (3)**

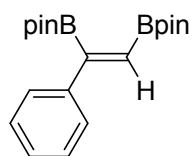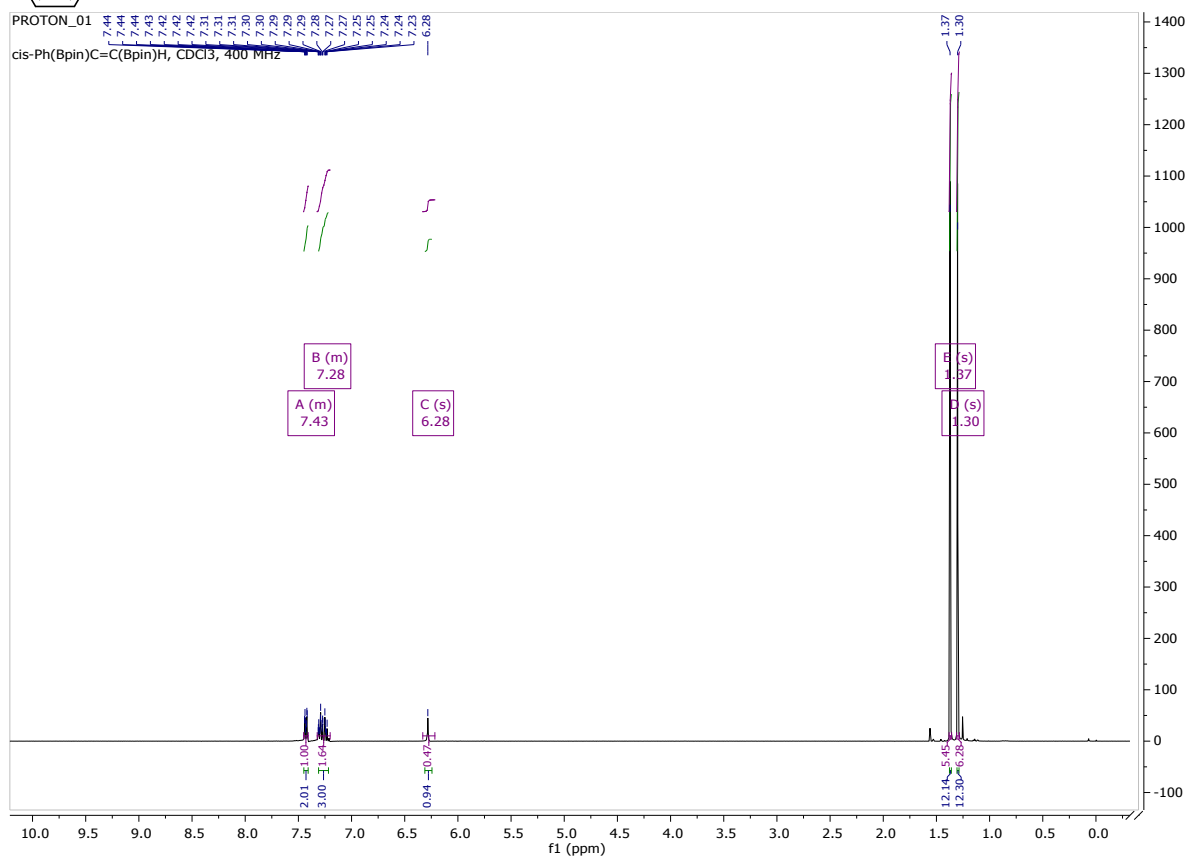



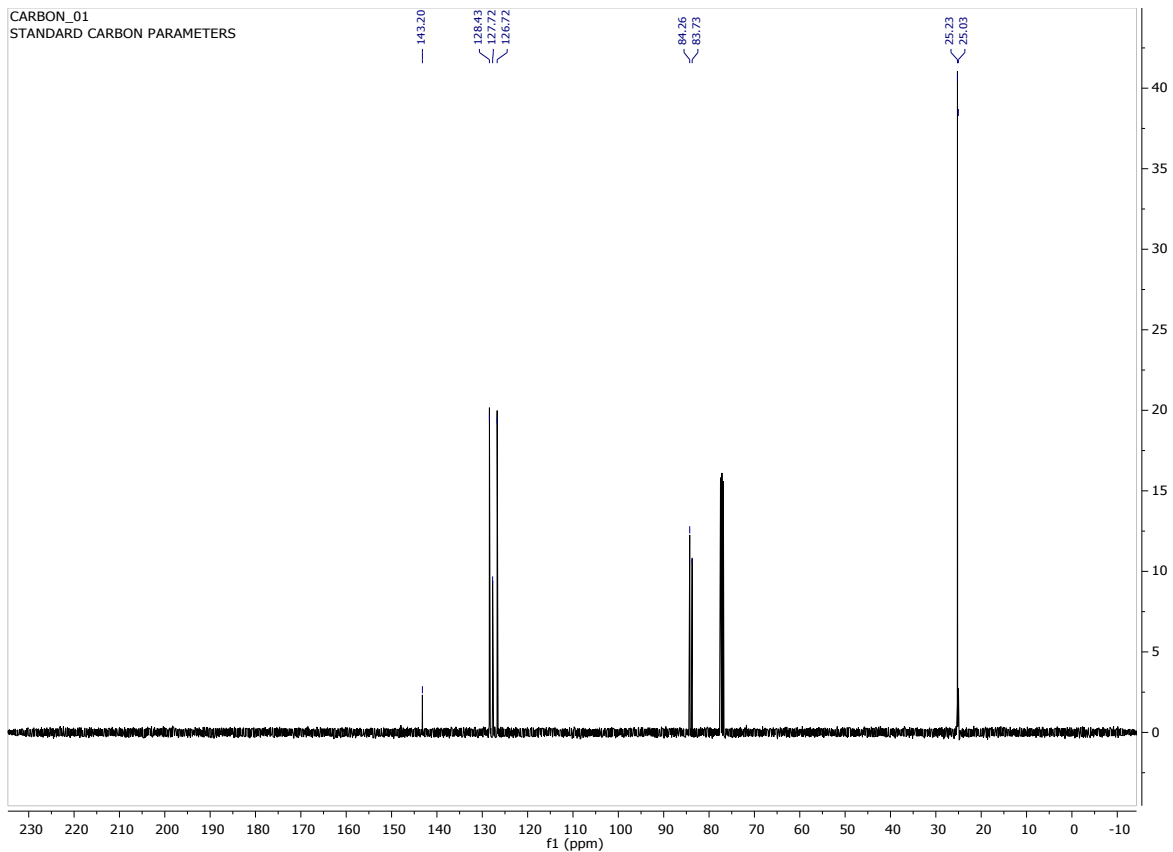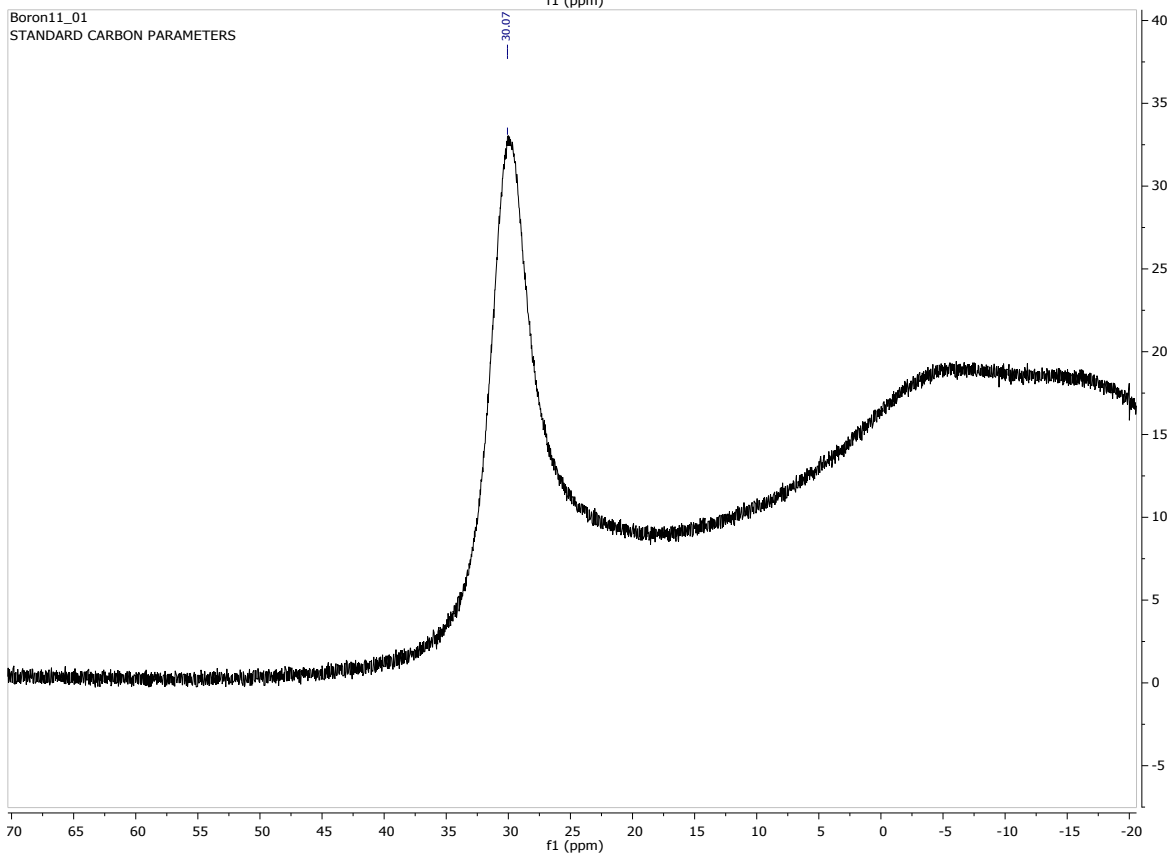

**(E)-2,2'-(1-(o-tolyl)ethene-1,2-diyl)bis(4,4,5,5-tetramethyl-1,3,2-dioxaborolane) (4)**

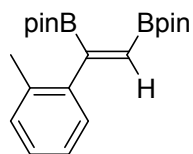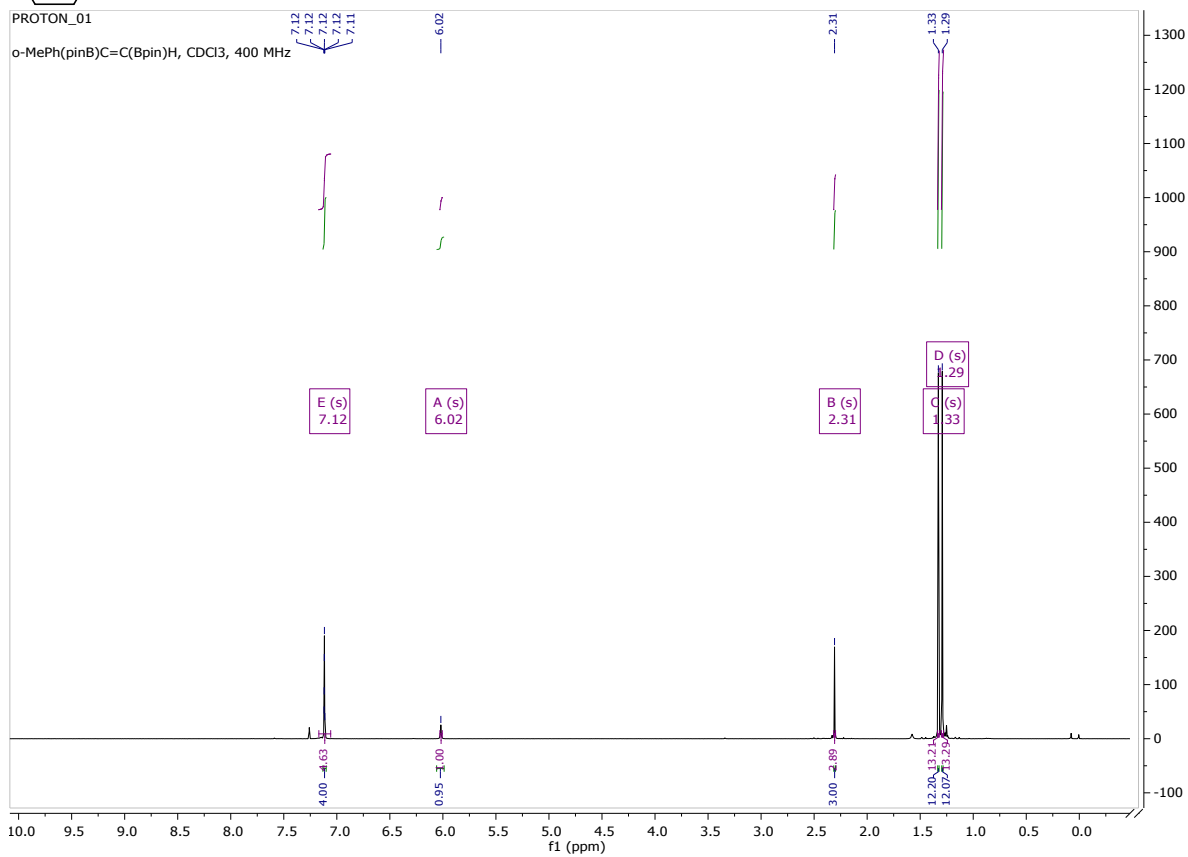

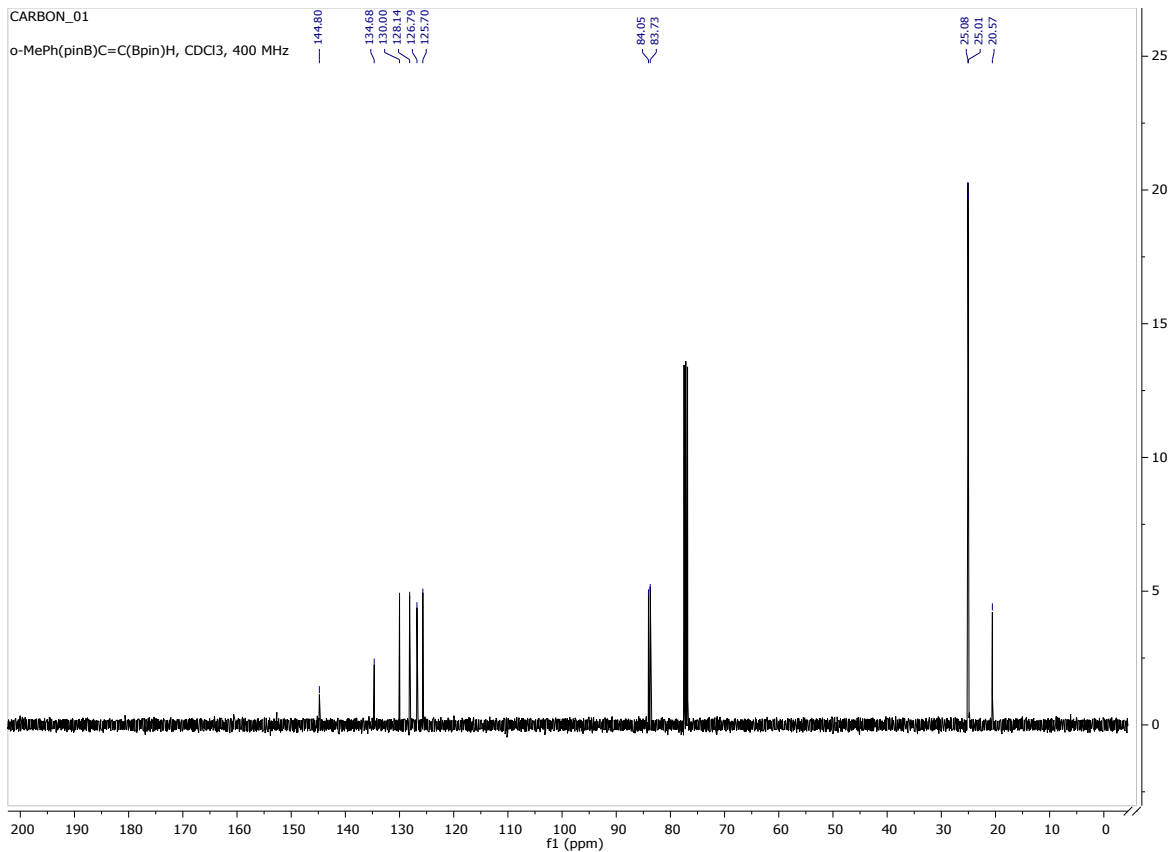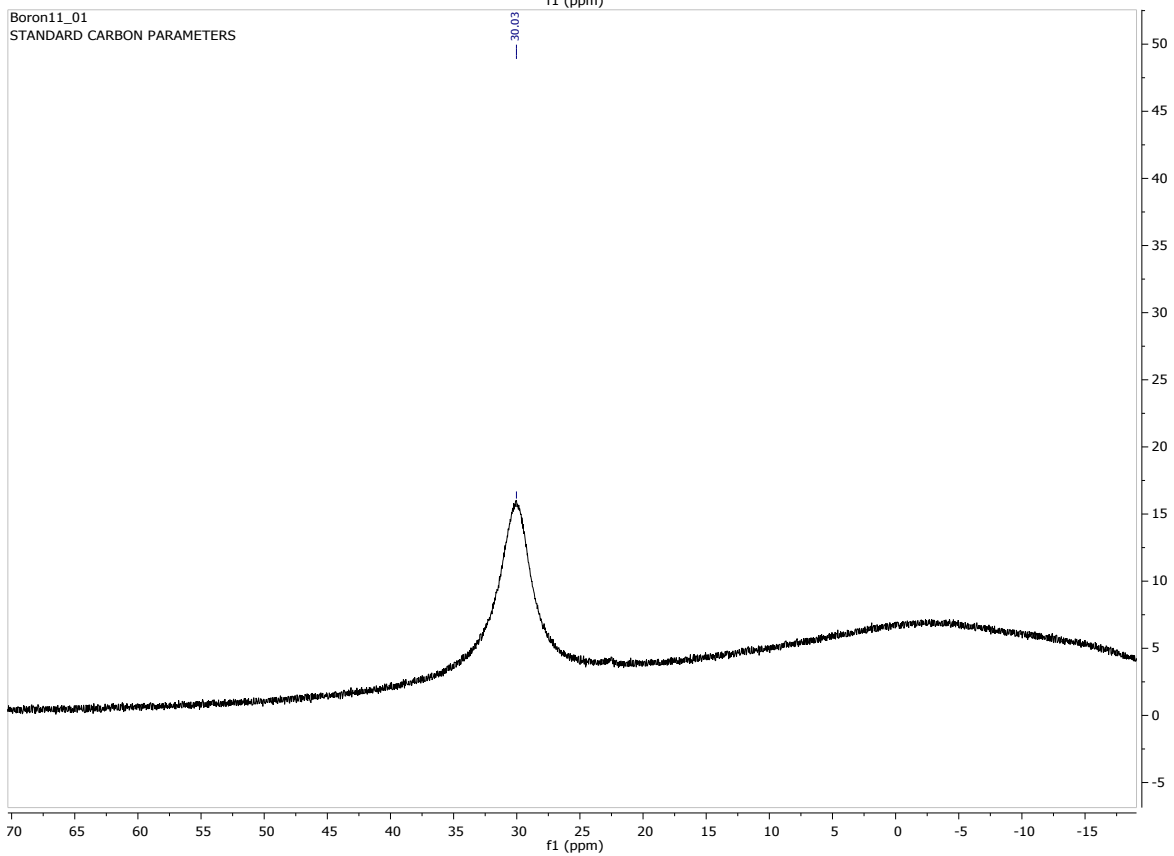

**(E)-2,2'-(1-(4-fluorophenyl)ethene-1,2-diyl)bis(4,4,5,5-tetramethyl-1,3,2-dioxaborolane) (5)**

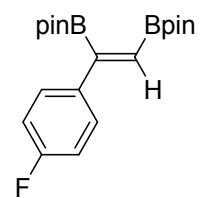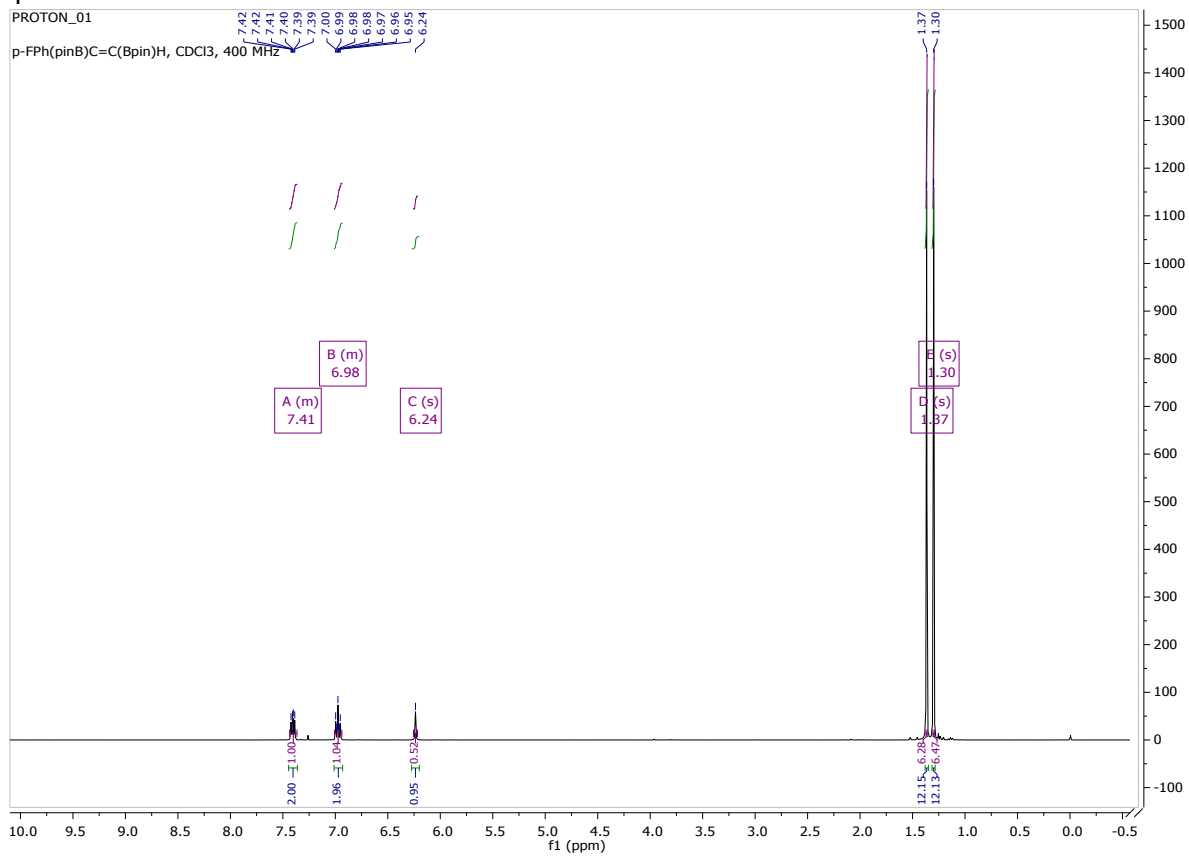

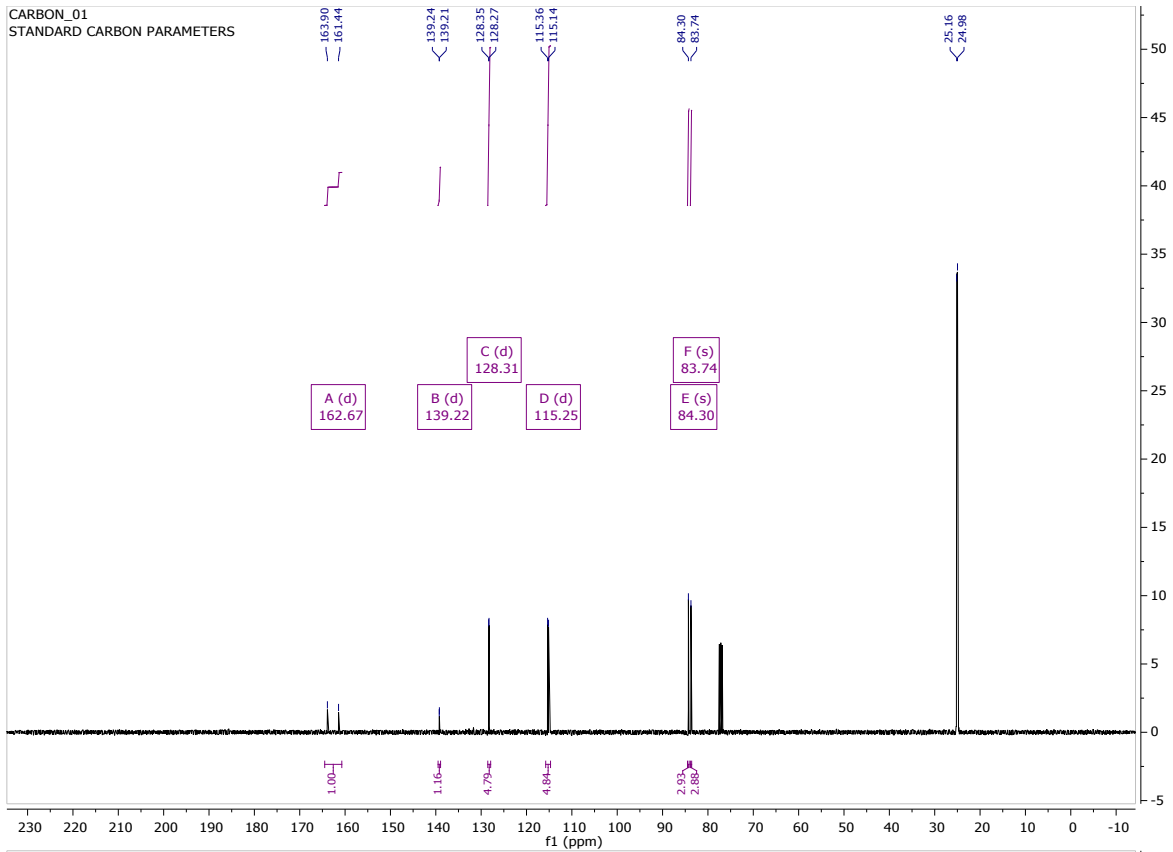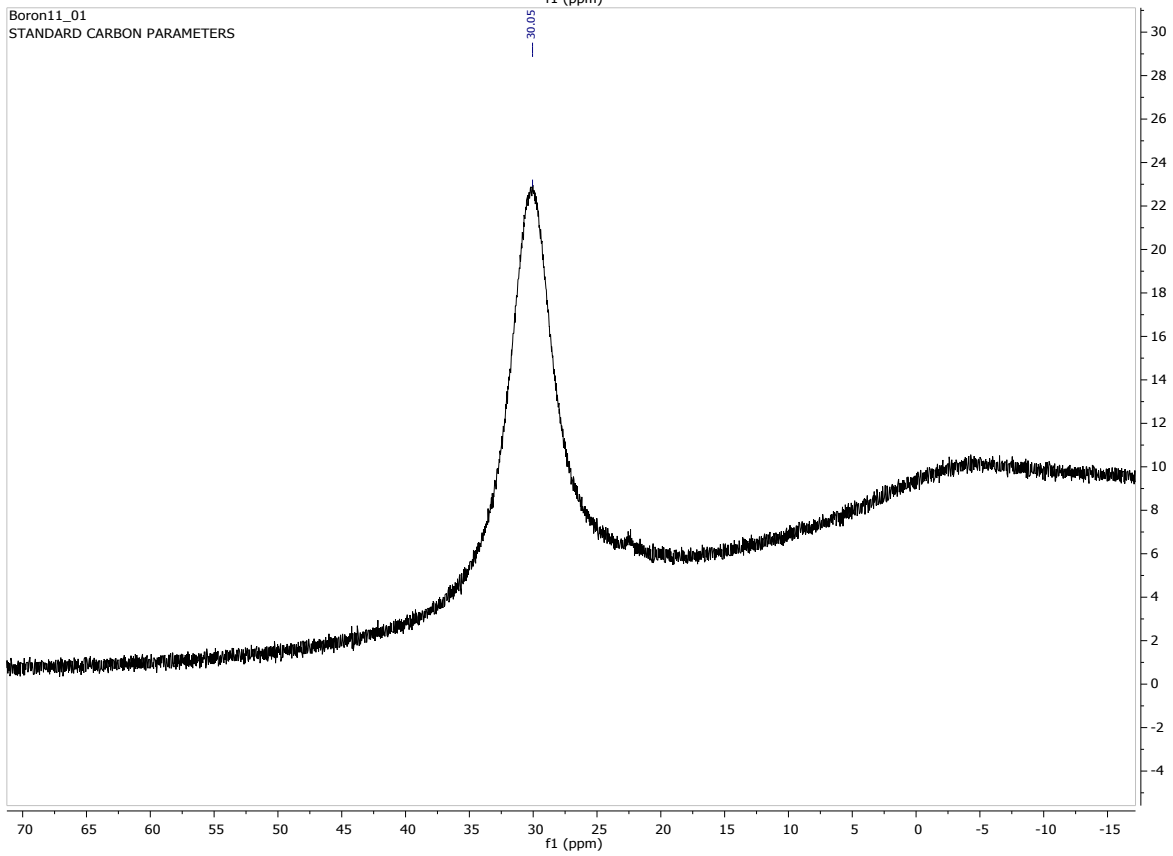

FLUORINE\_01  
STANDARD FLUORINE PARAMETERS

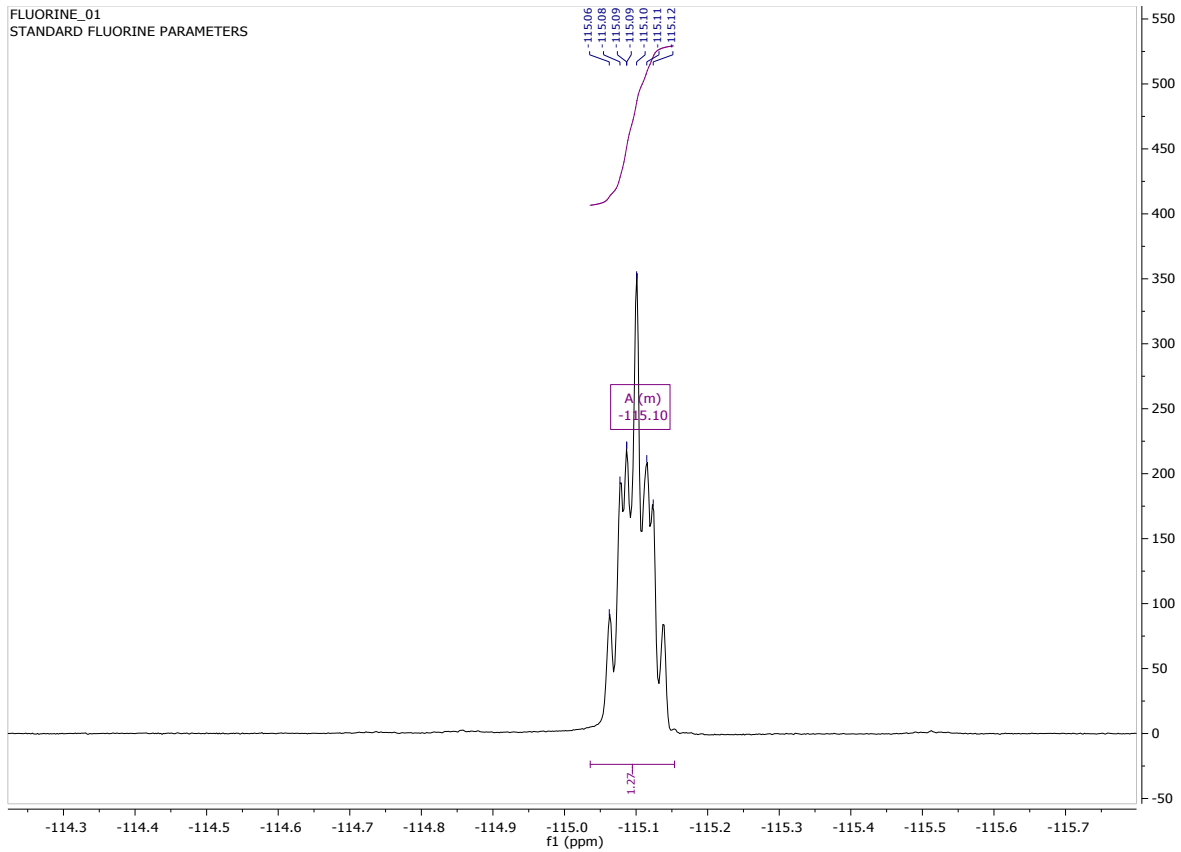

**(E)-2,2'-(1-(4-methoxyphenyl)ethene-1,2-diyl)bis(4,4,5,5-tetramethyl-1,3,2-dioxaborolane) (6)**

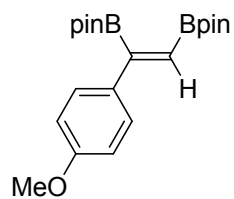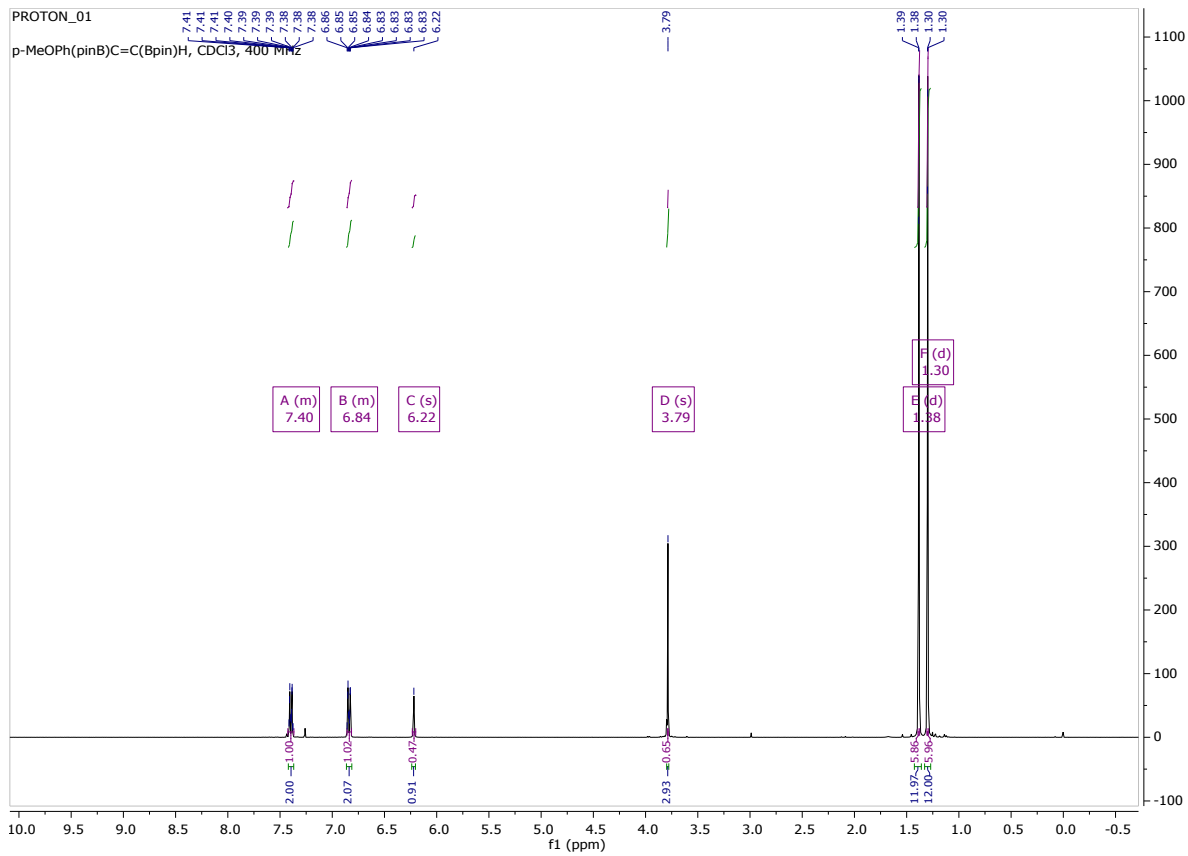

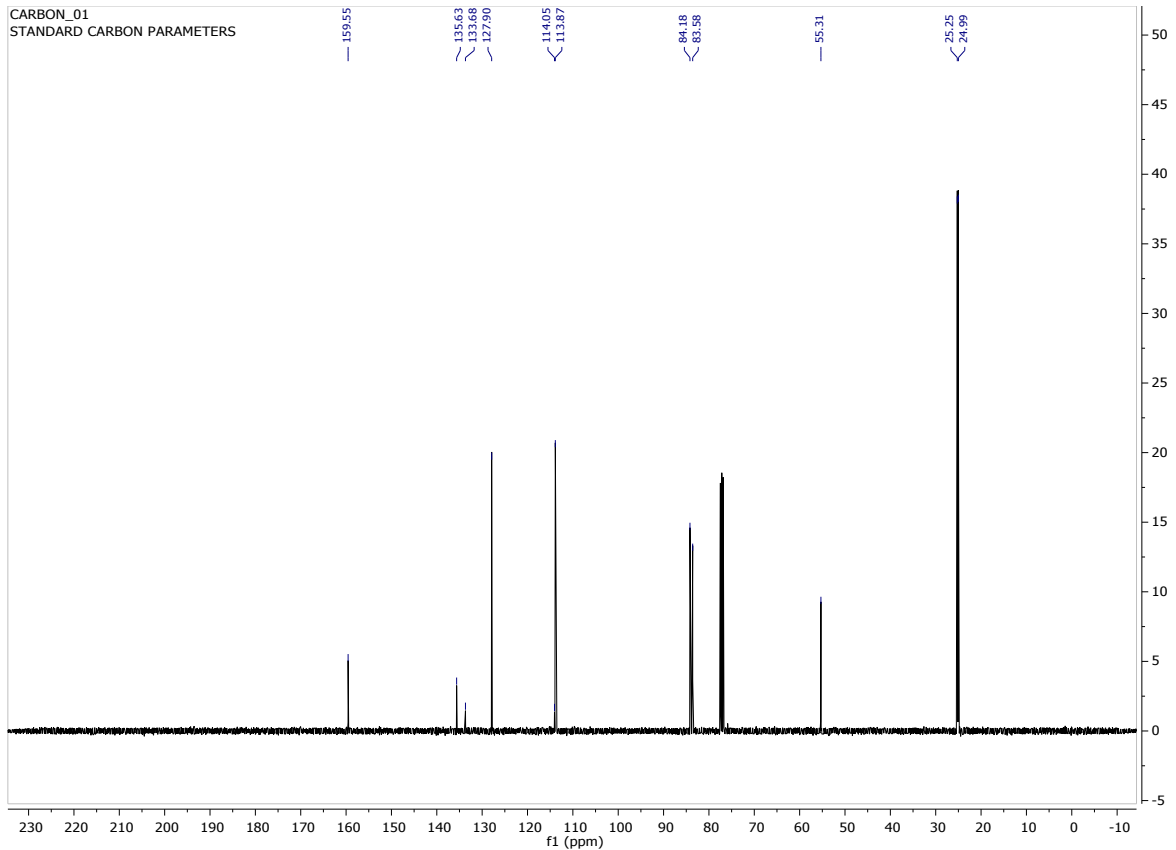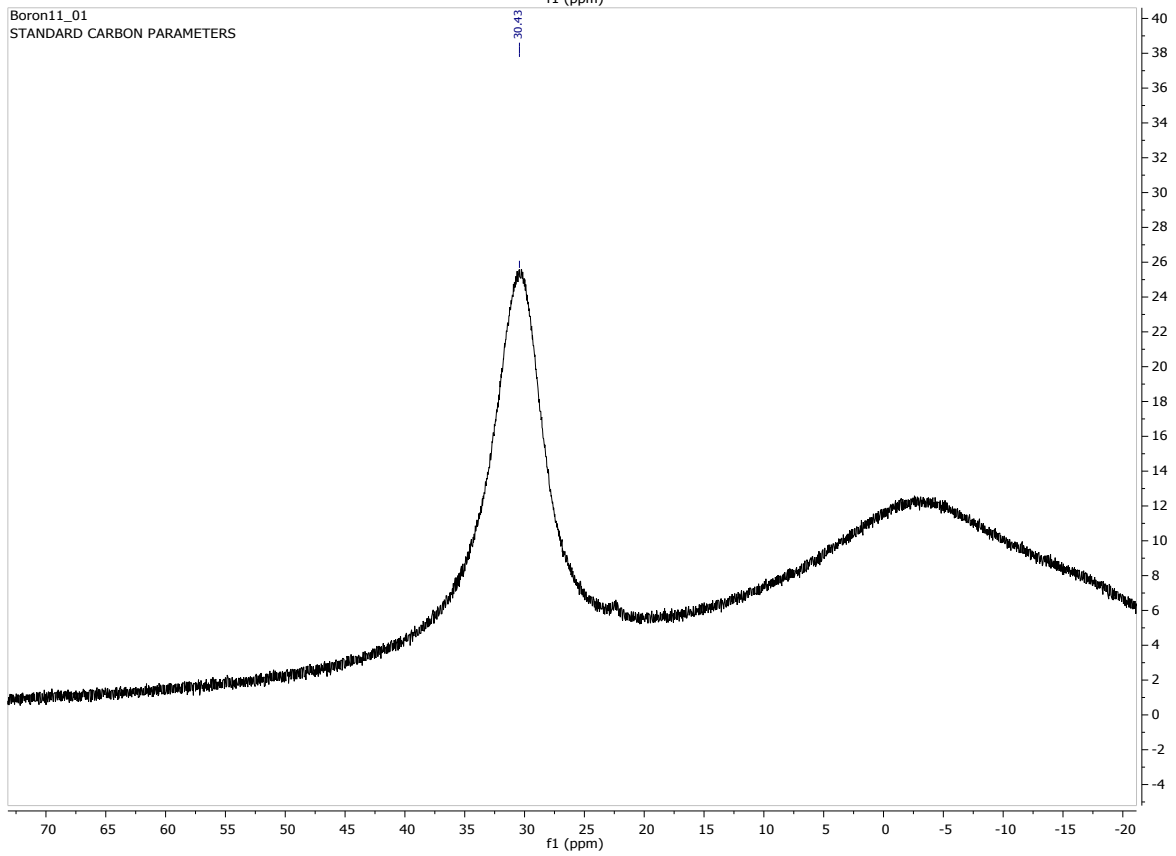



(E)-2,2'-(1-(4-(trifluoromethyl)phenyl)ethene-1,2-diyl)bis(4,4,5,5-tetramethyl-1,3,2-dioxaborolane)

(7)

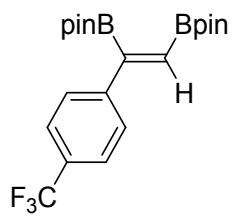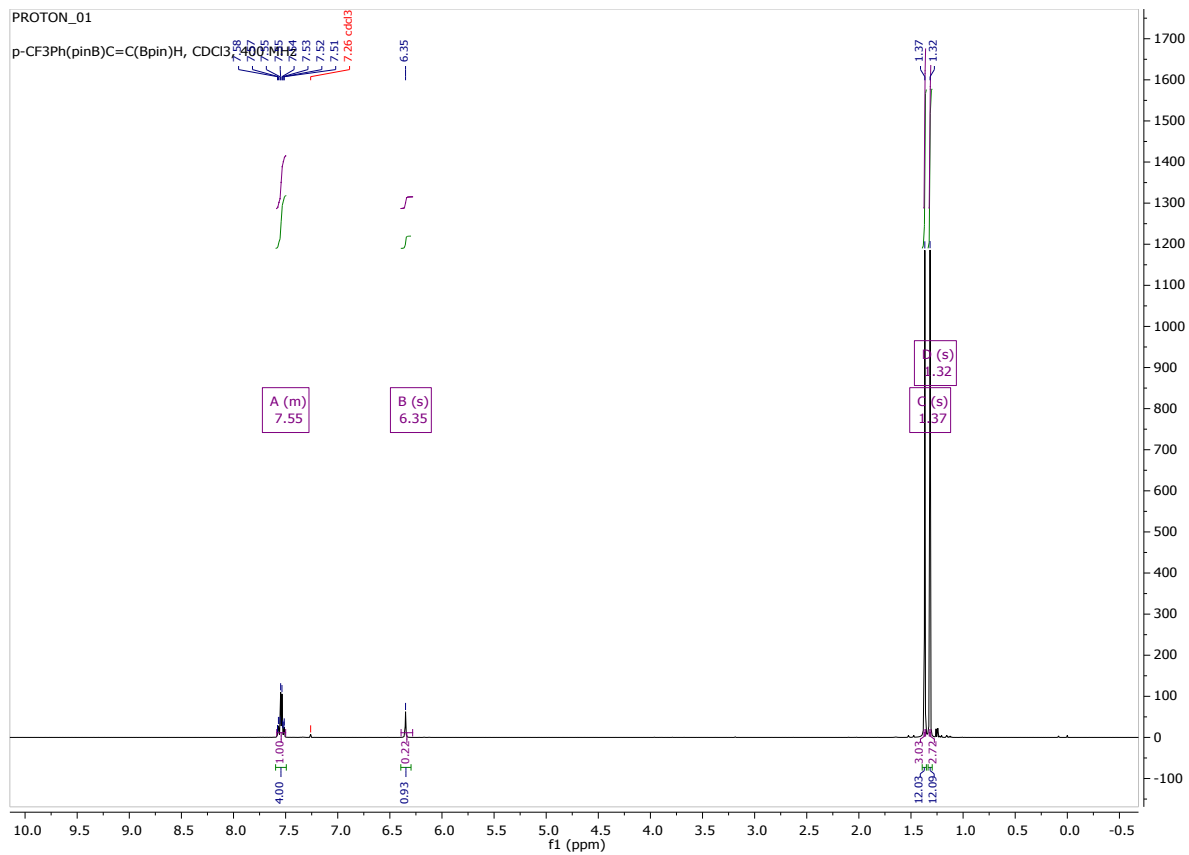

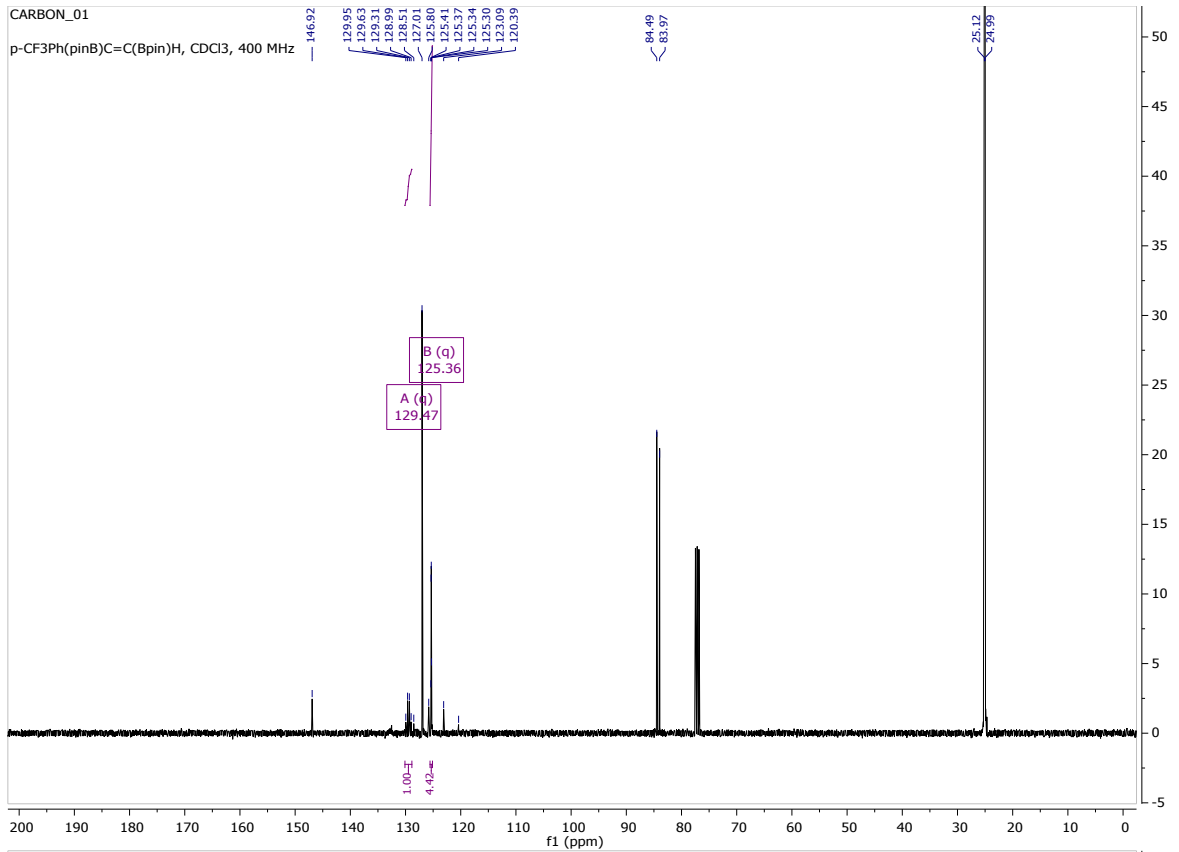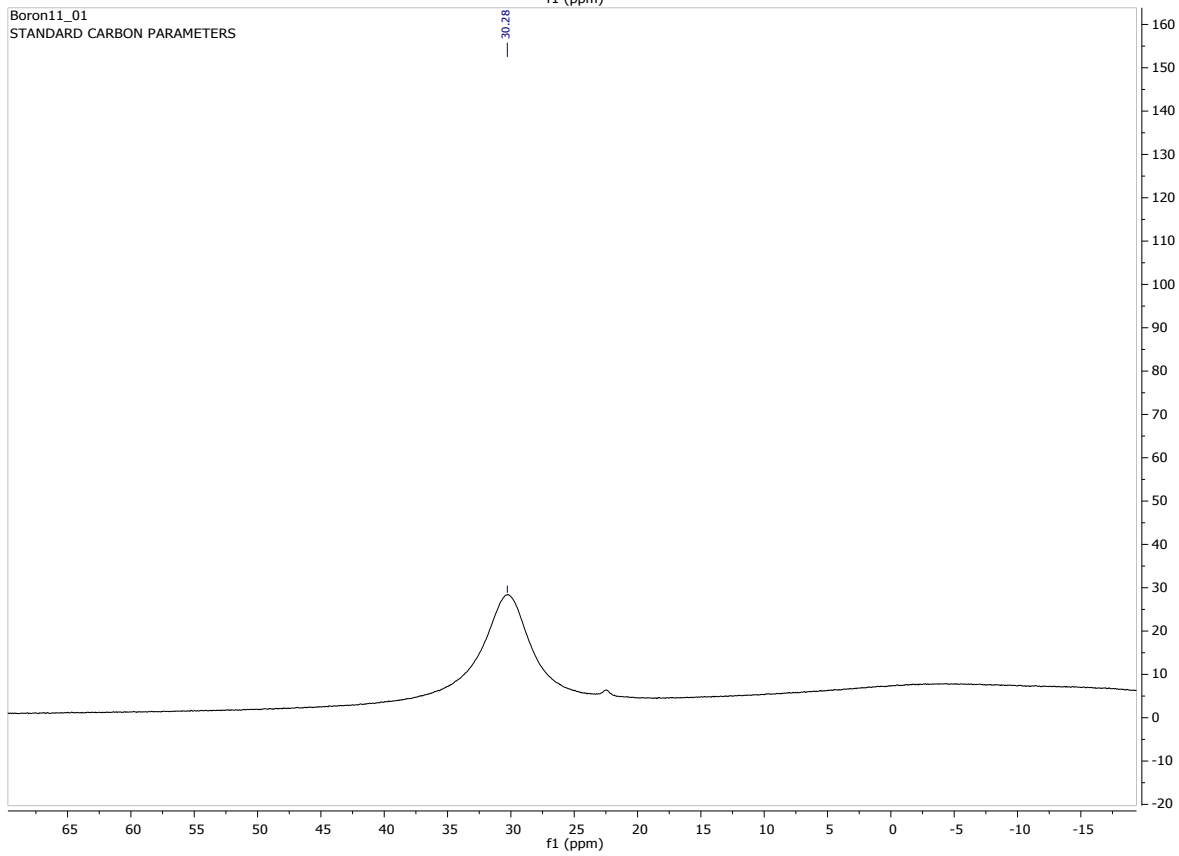

FLUORINE\_01  
STANDARD FLUORINE PARAMETERS

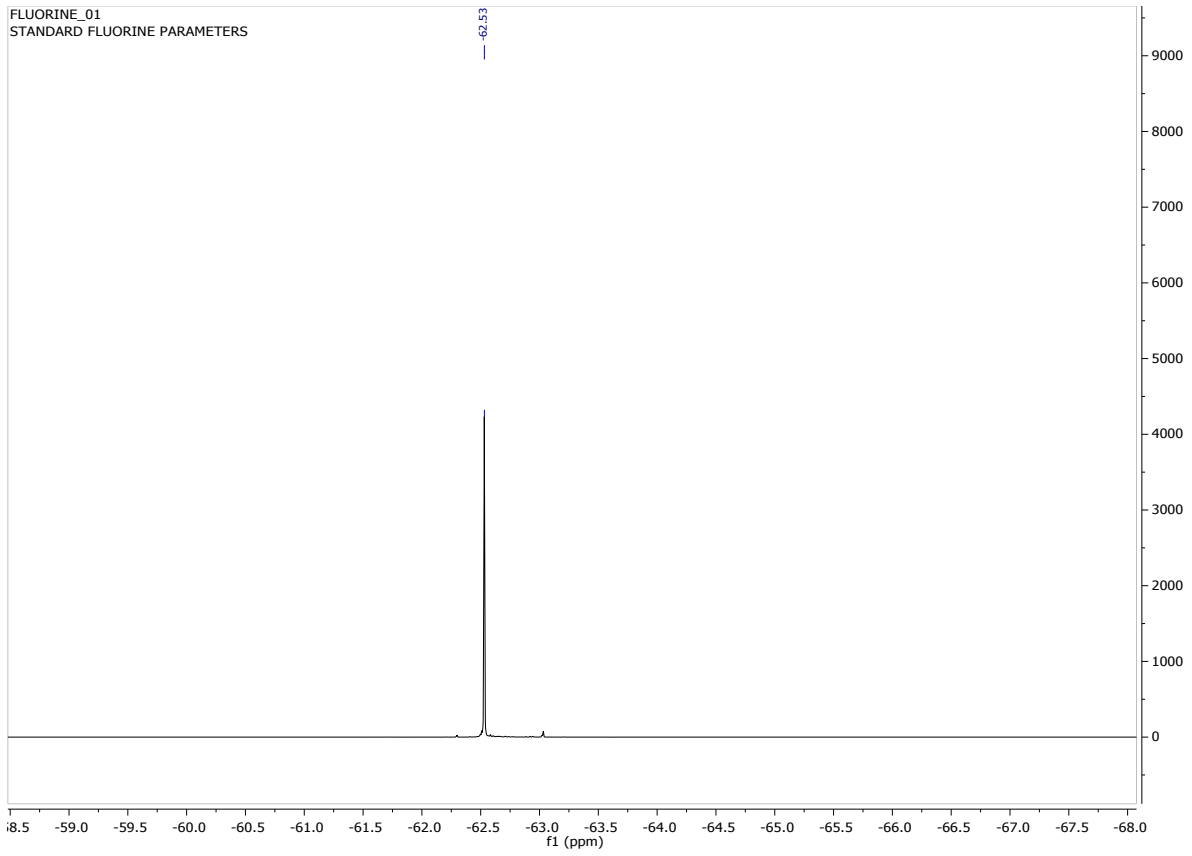

**(E)-2,2'-(oct-1-ene-1,2-diyl)bis(4,4,5,5-tetramethyl-1,3,2-dioxaborolane) (8)**

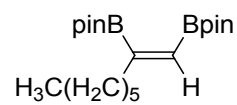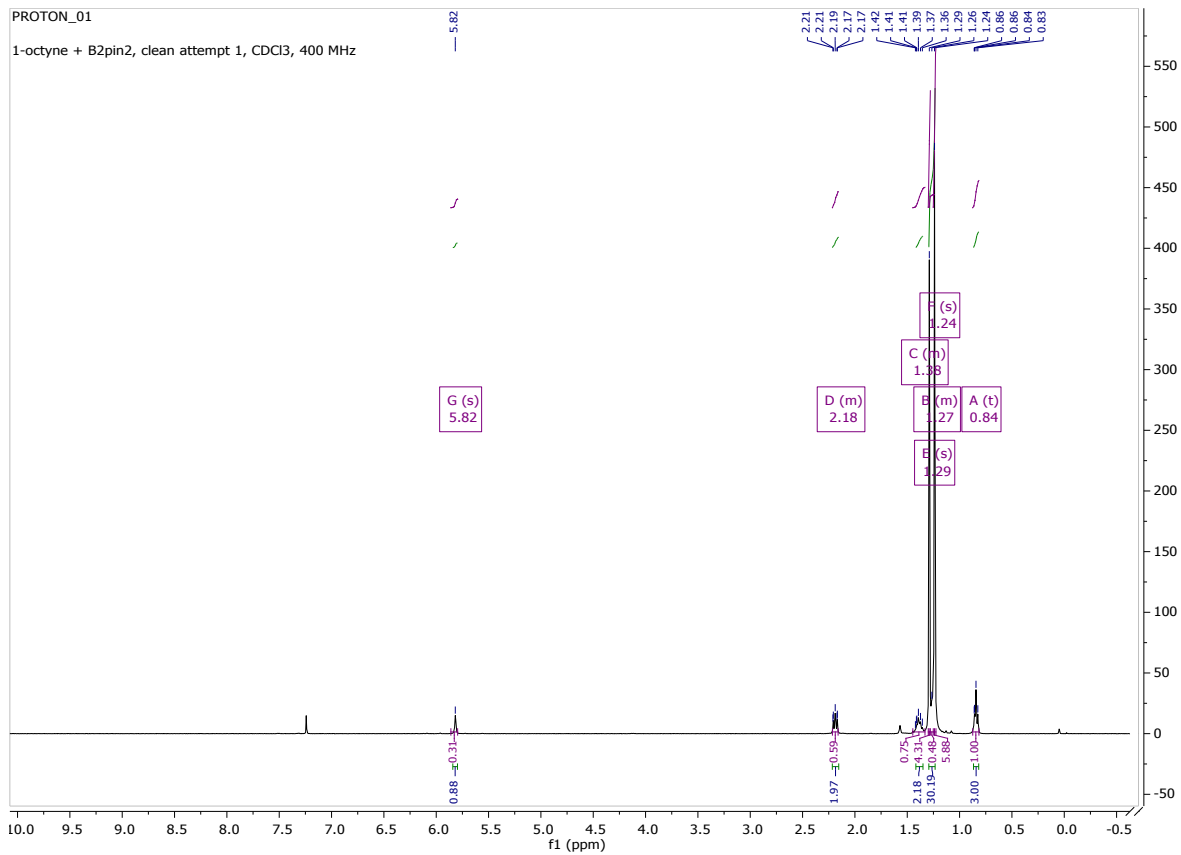

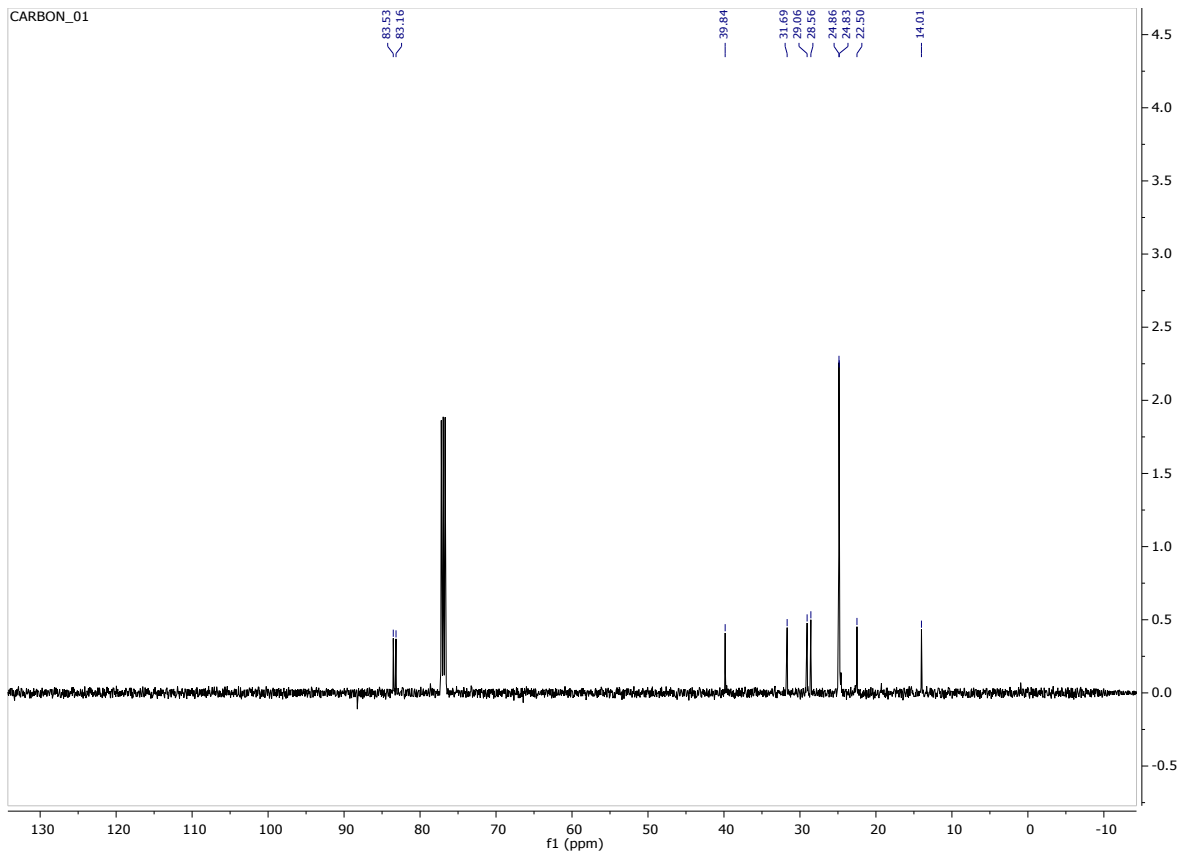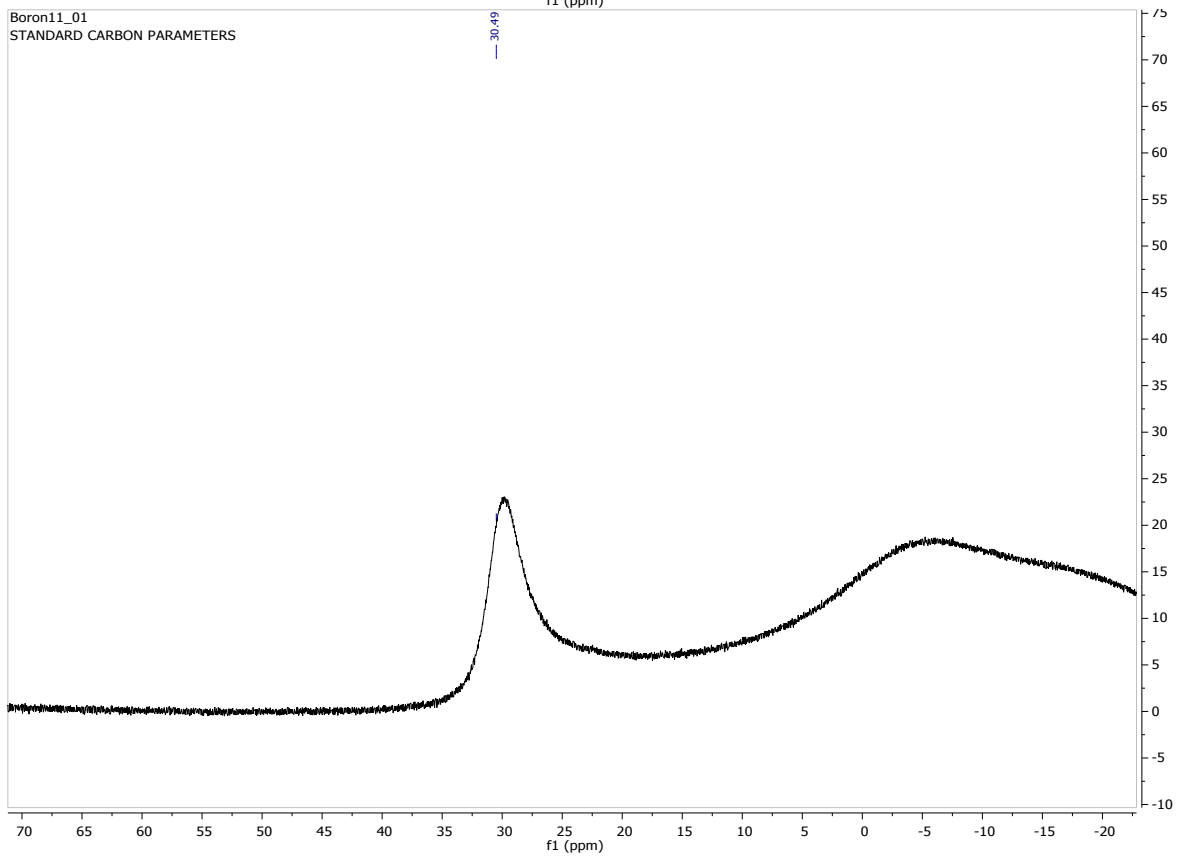

**(E)-2,2'-(1-(3,5-bis(trifluoromethyl)phenyl)ethene-1,2-diyl)bis(4,4,5,5-tetramethyl-1,3,2-dioxaborolane) (9)**

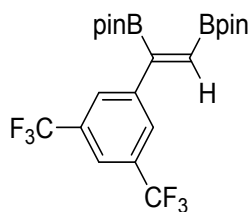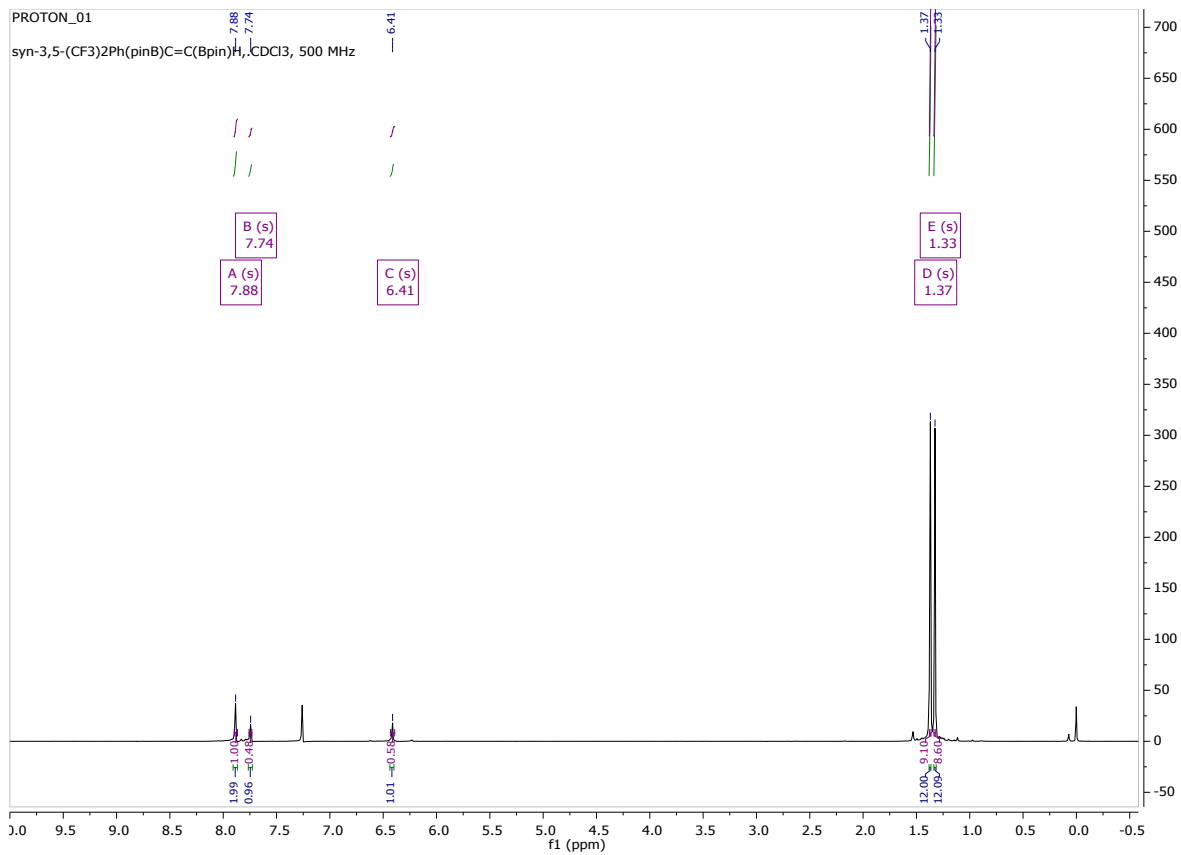

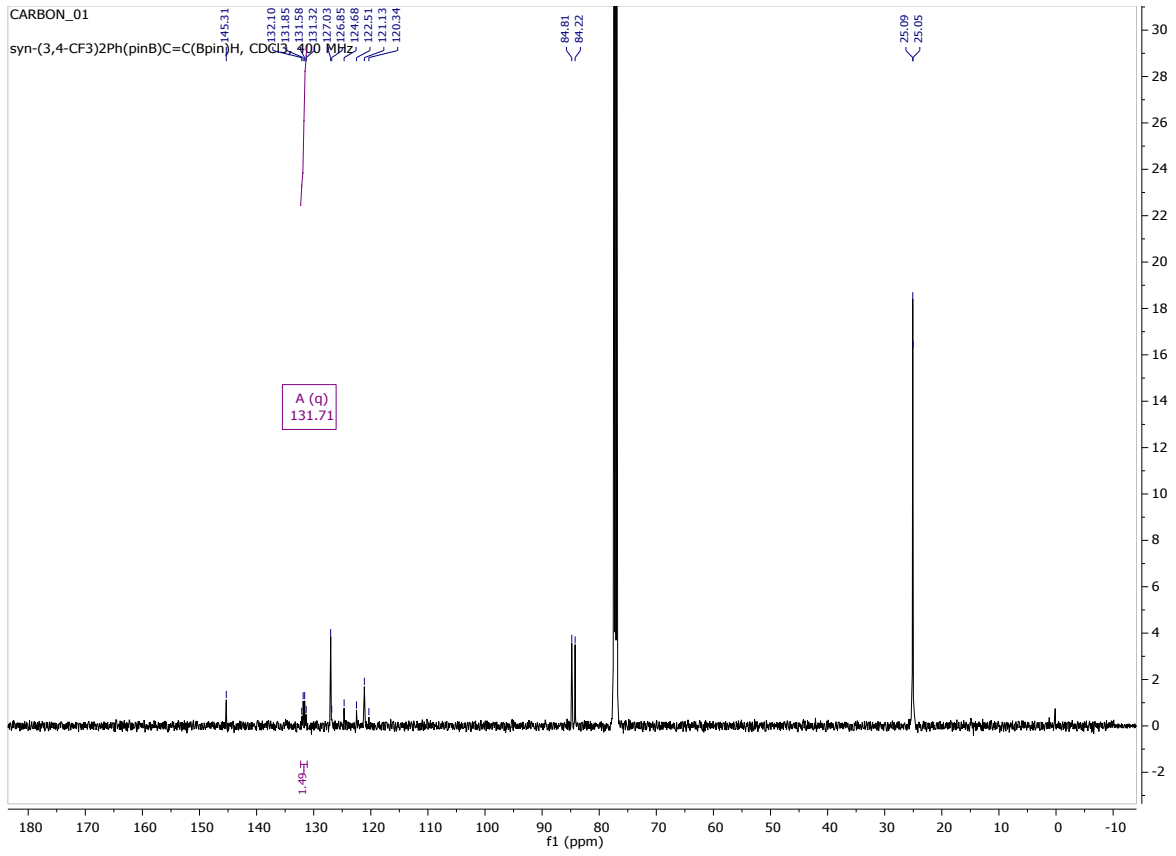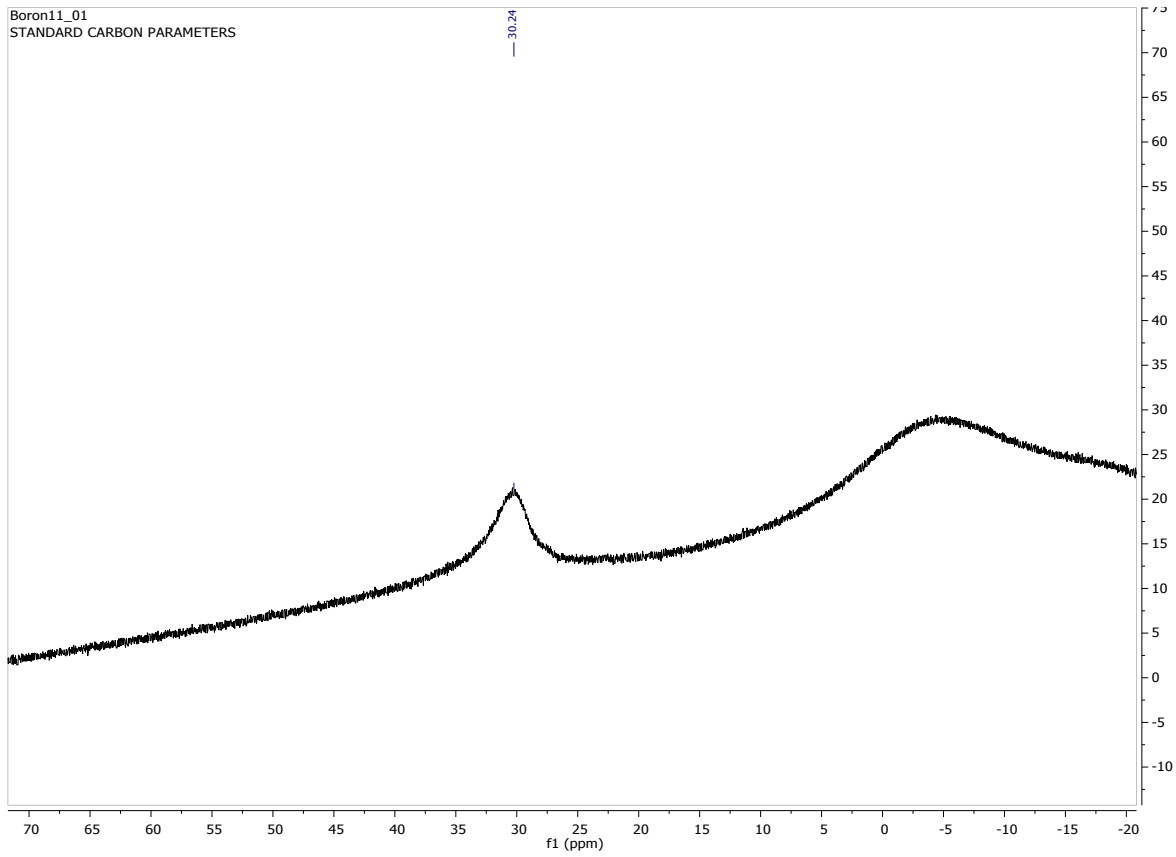

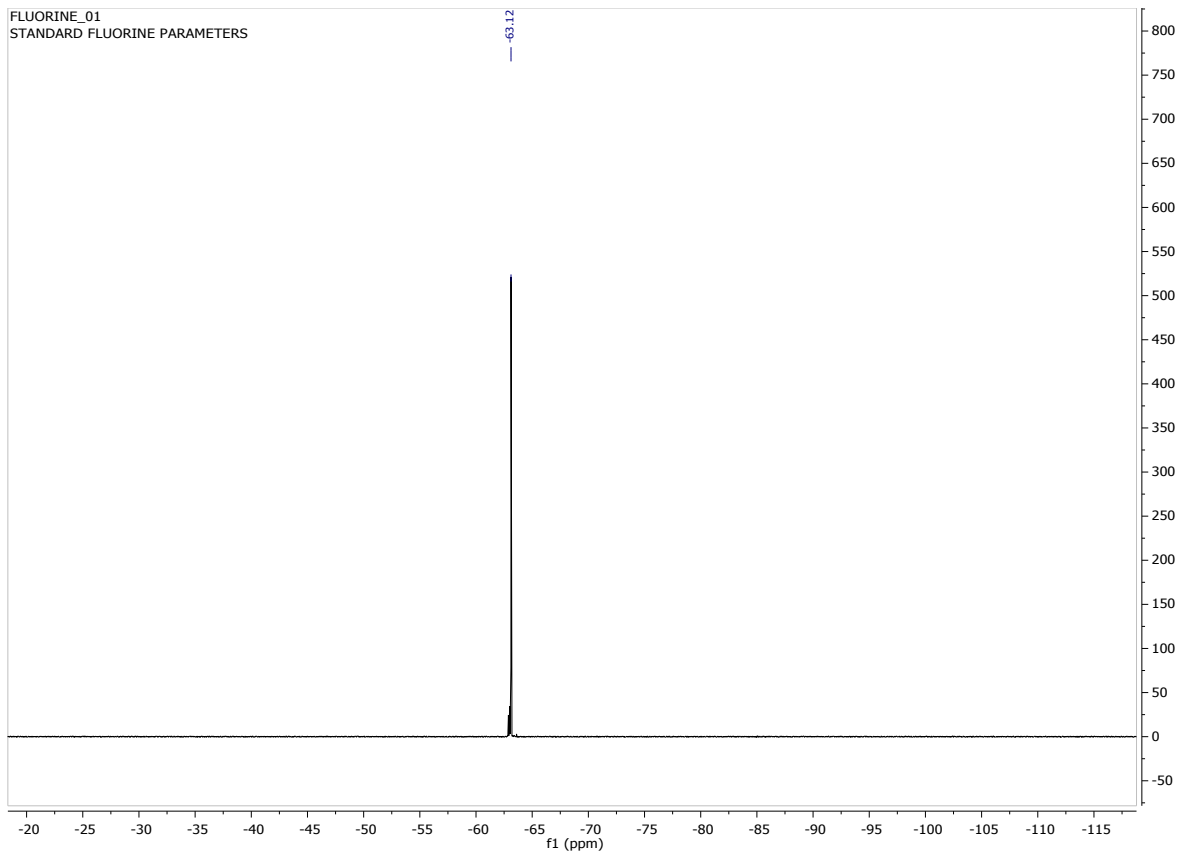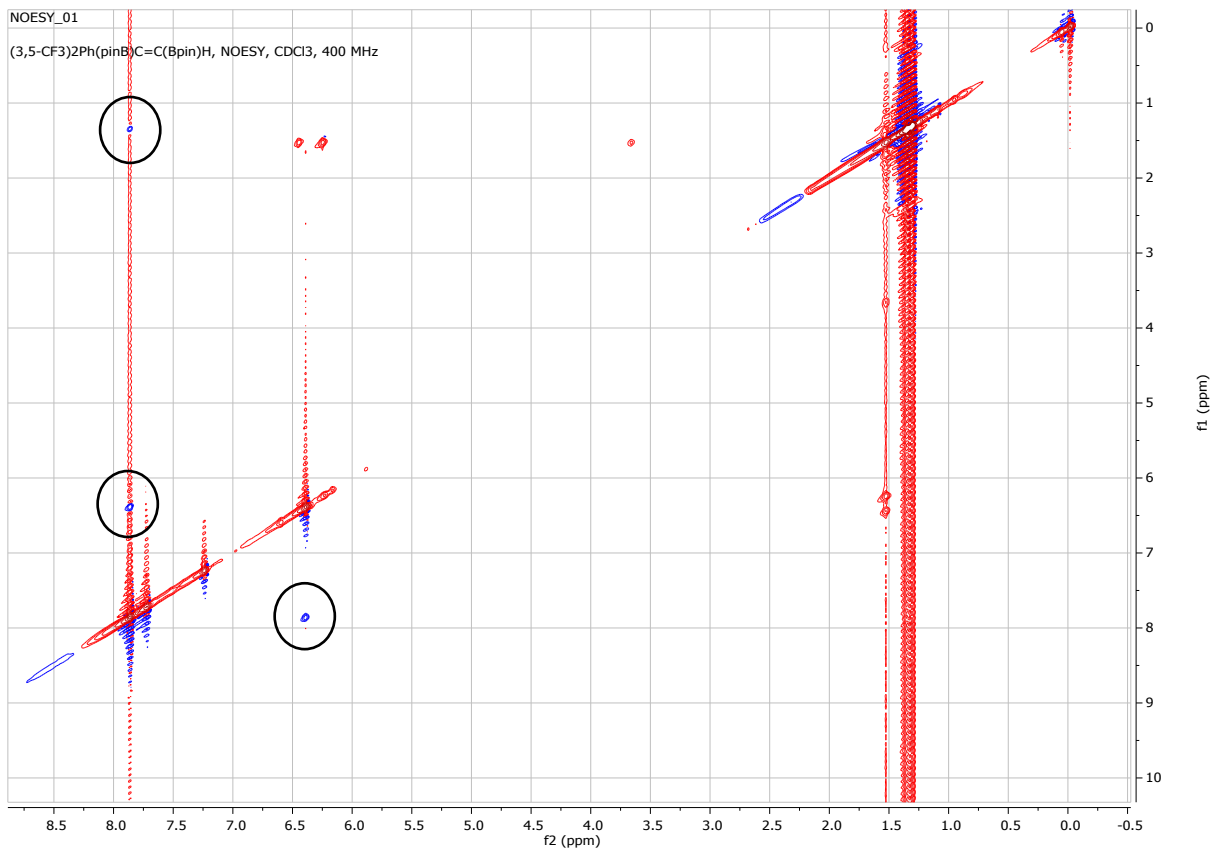



(E)-2,2'-(1-mesitylene-1,2-diyl)bis(4,4,5,5-tetramethyl-1,3,2-dioxaborolane) (10)

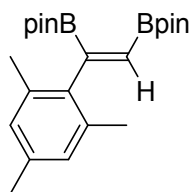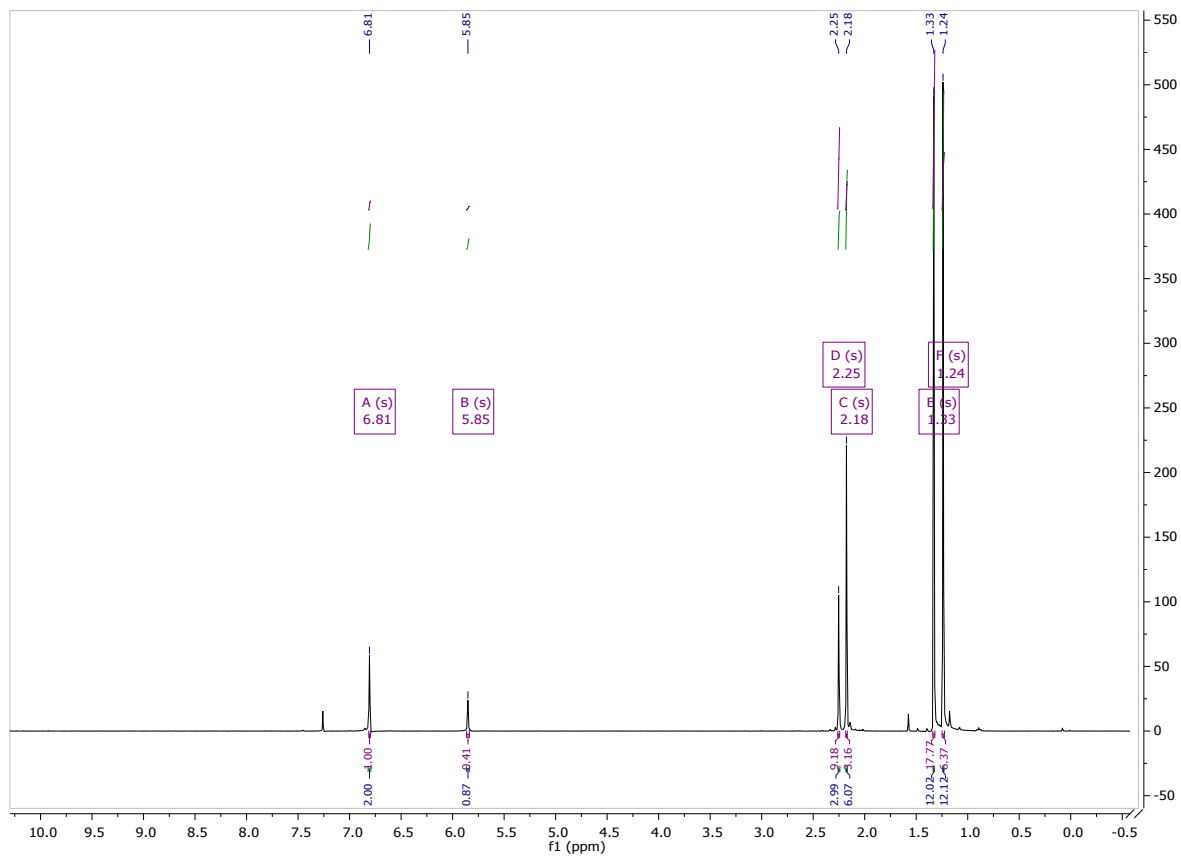

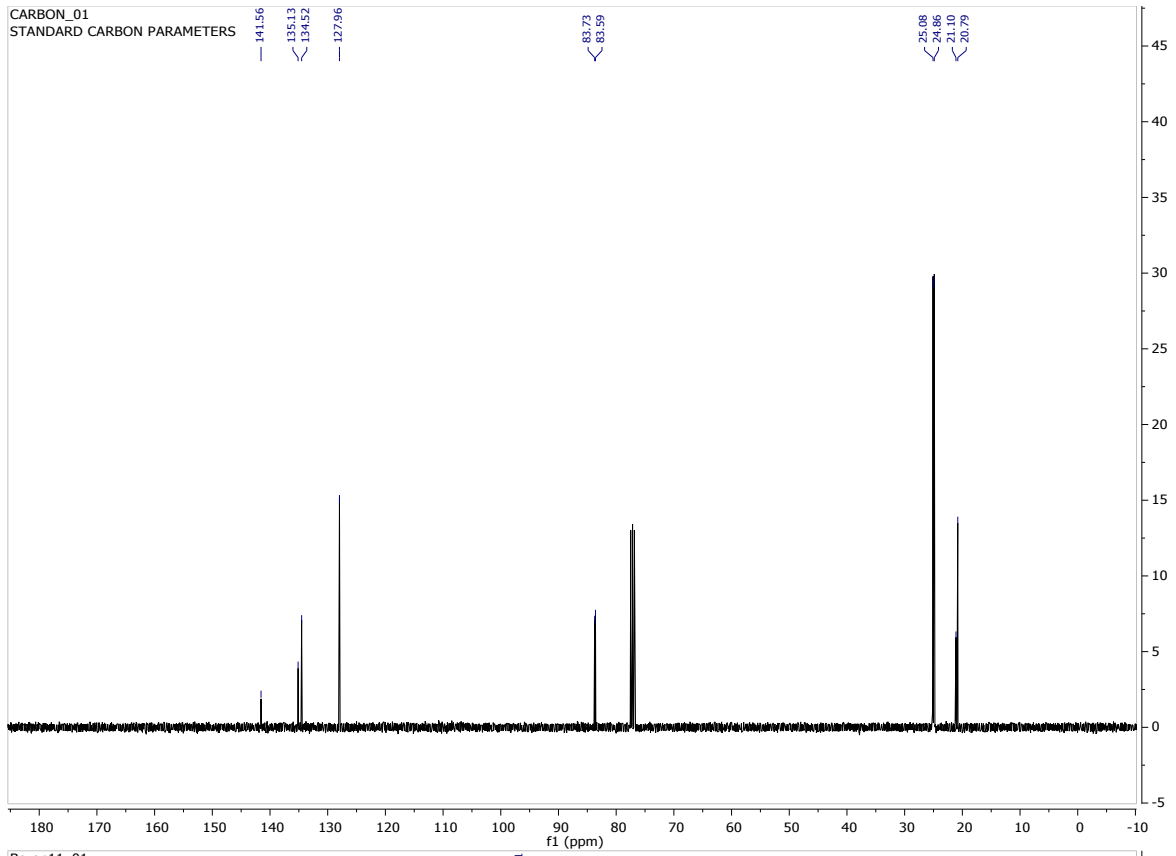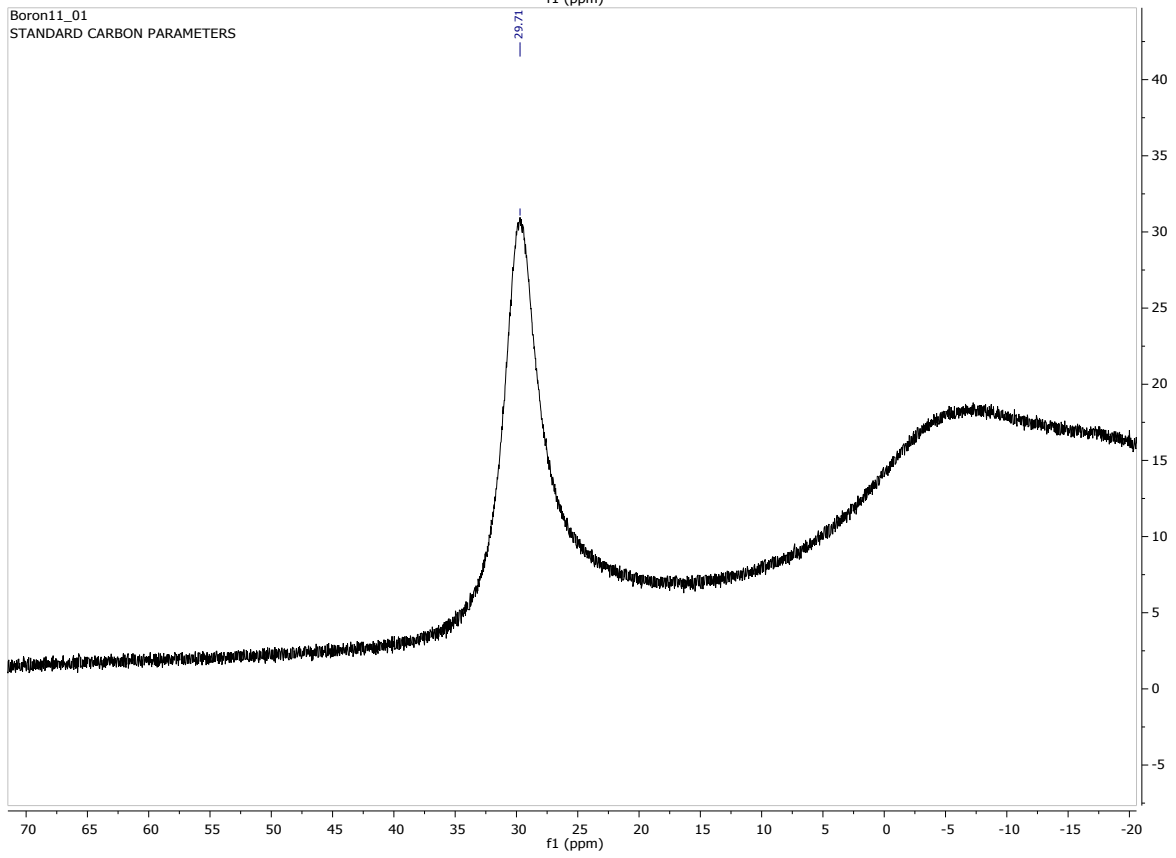

NOESY\_01  
cis-Mes(pinB)C=C(Bpin)H, CDCl<sub>3</sub>, 400 MHz

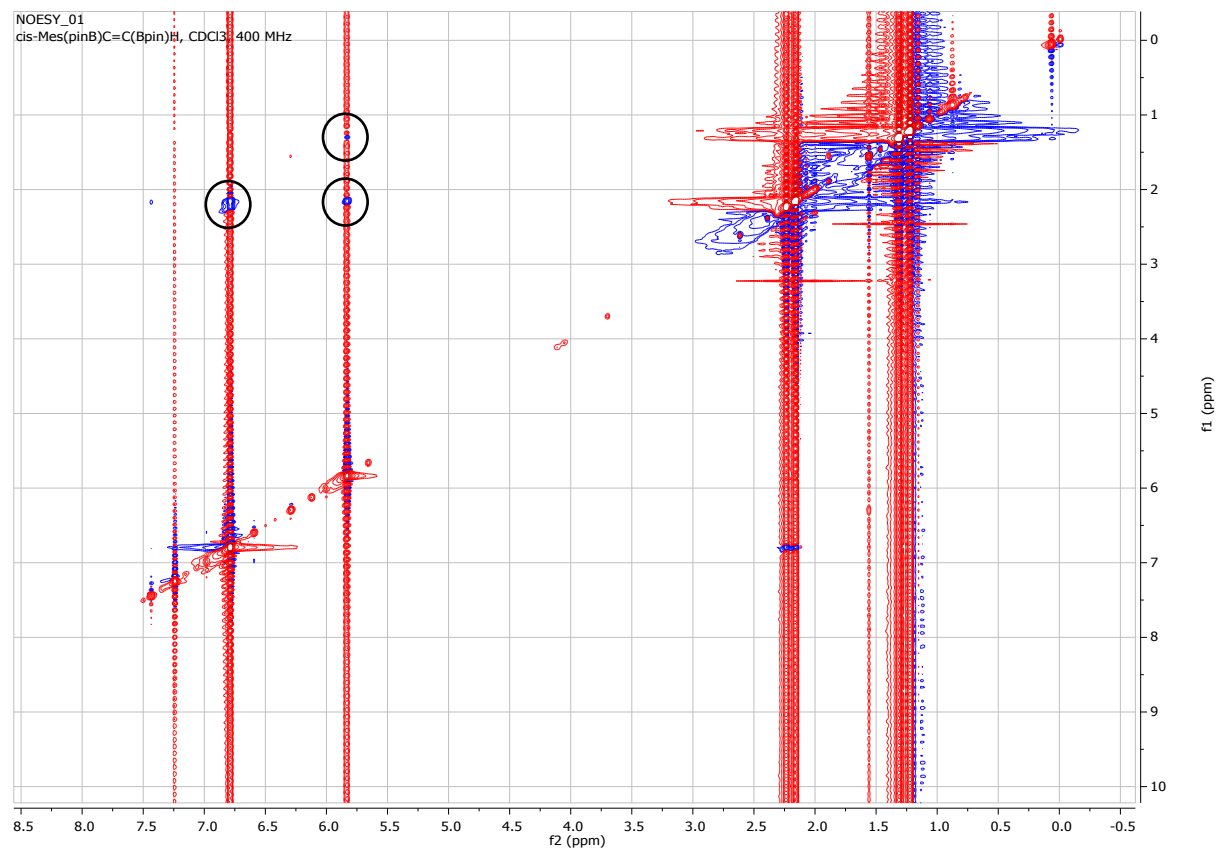

**(E)-2,2'-(1-(cyclohex-1-en-1-yl)ethene-1,2-diyl)bis(4,4,5,5-tetramethyl-1,3,2-dioxaborolane) (11)**

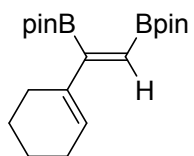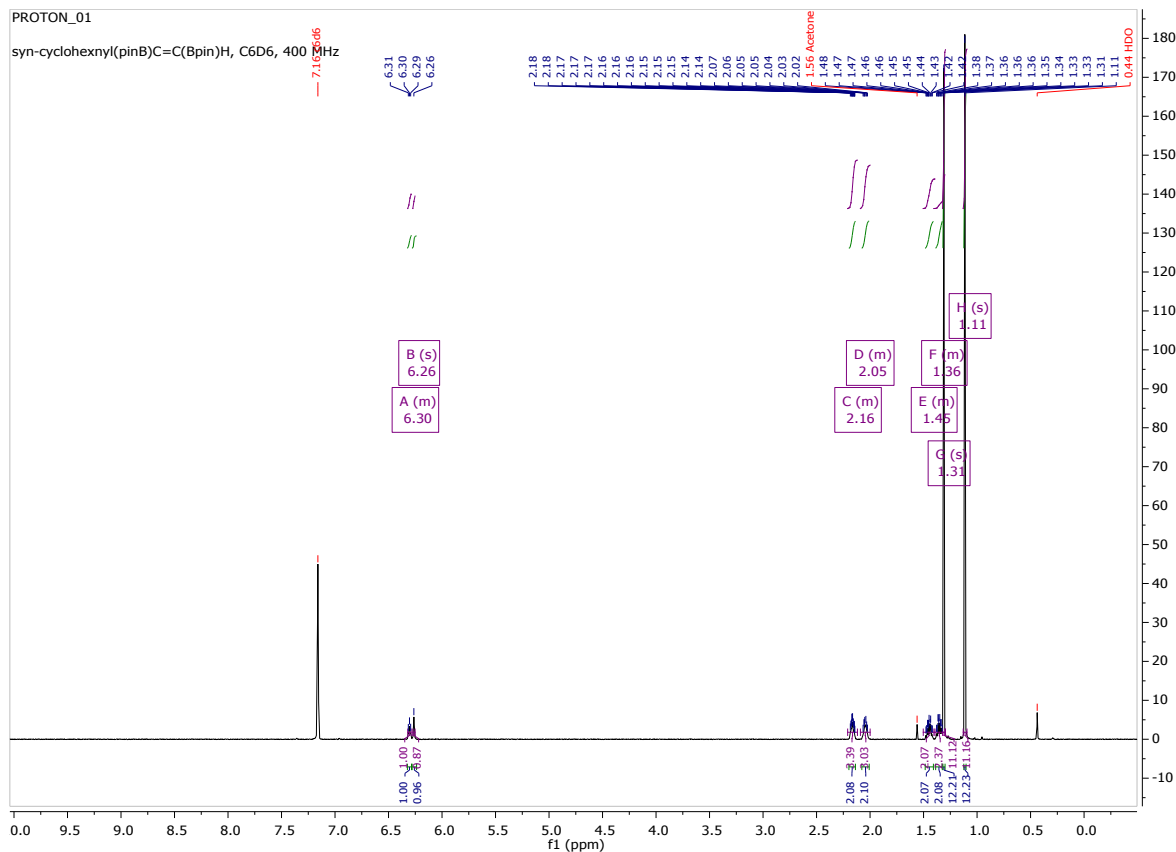

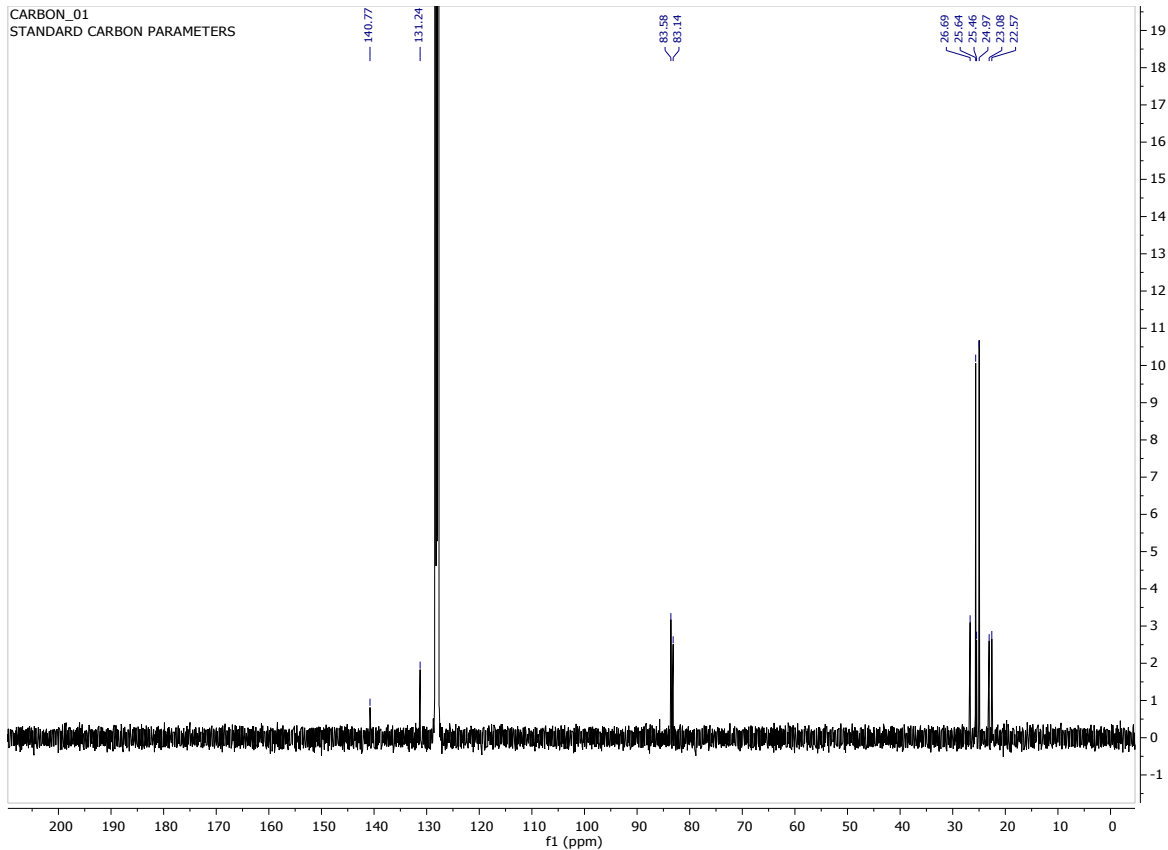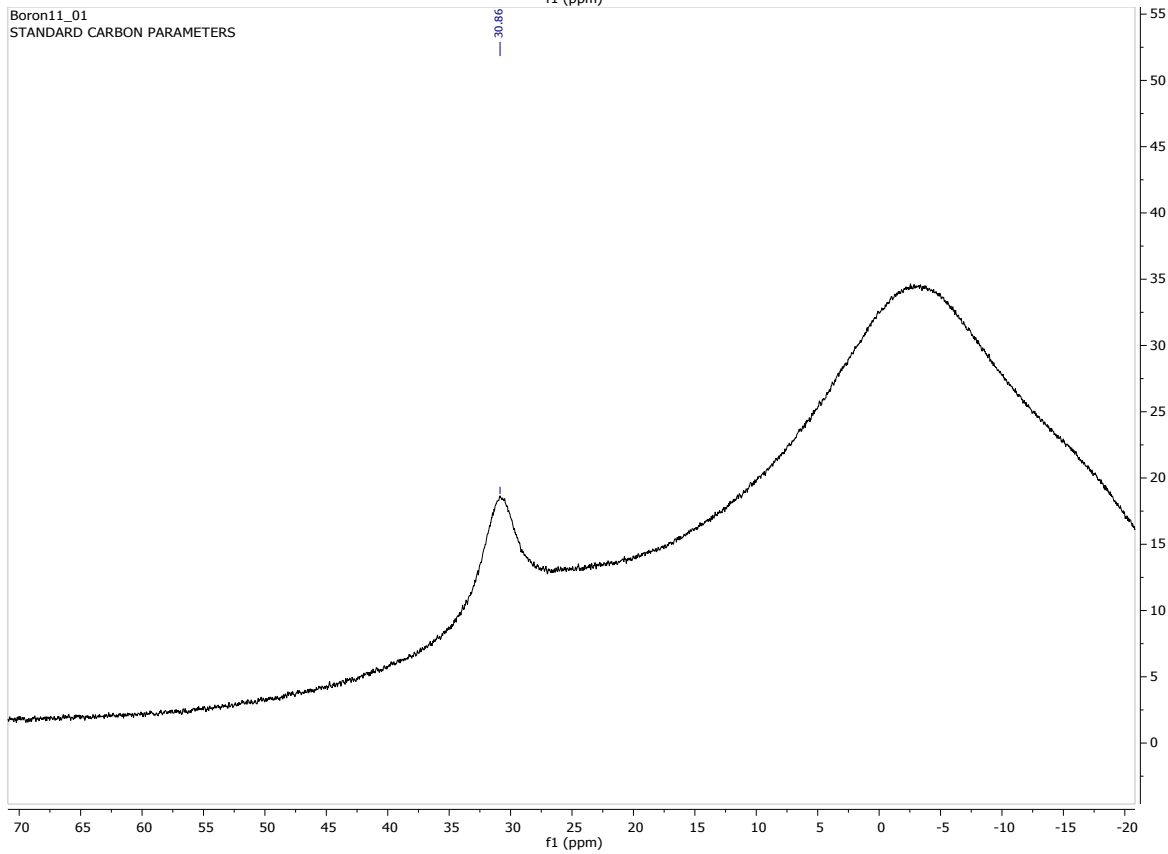

NOESY\_01

syn-cyclohexenyl(pinB)C=C(Bpin)H, C6D6, 400 MHz

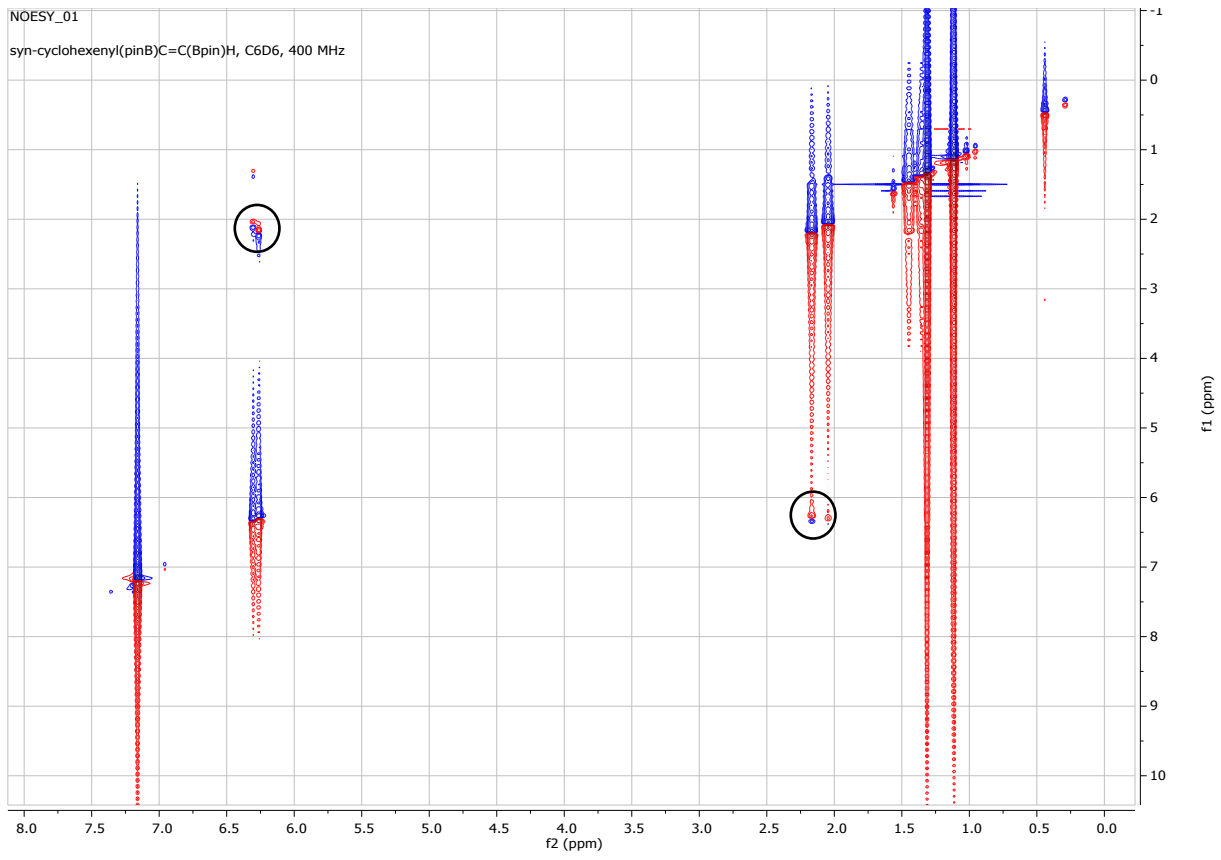

**(Z)-2,2'-(1-(4-ethylphenyl)-2-(4-methoxyphenyl)ethene-1,2-diyl)bis(4,4,5,5-tetramethyl-1,3,2-dioxaborolane) (12)**

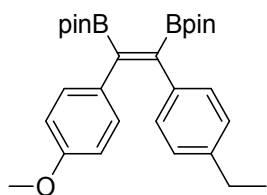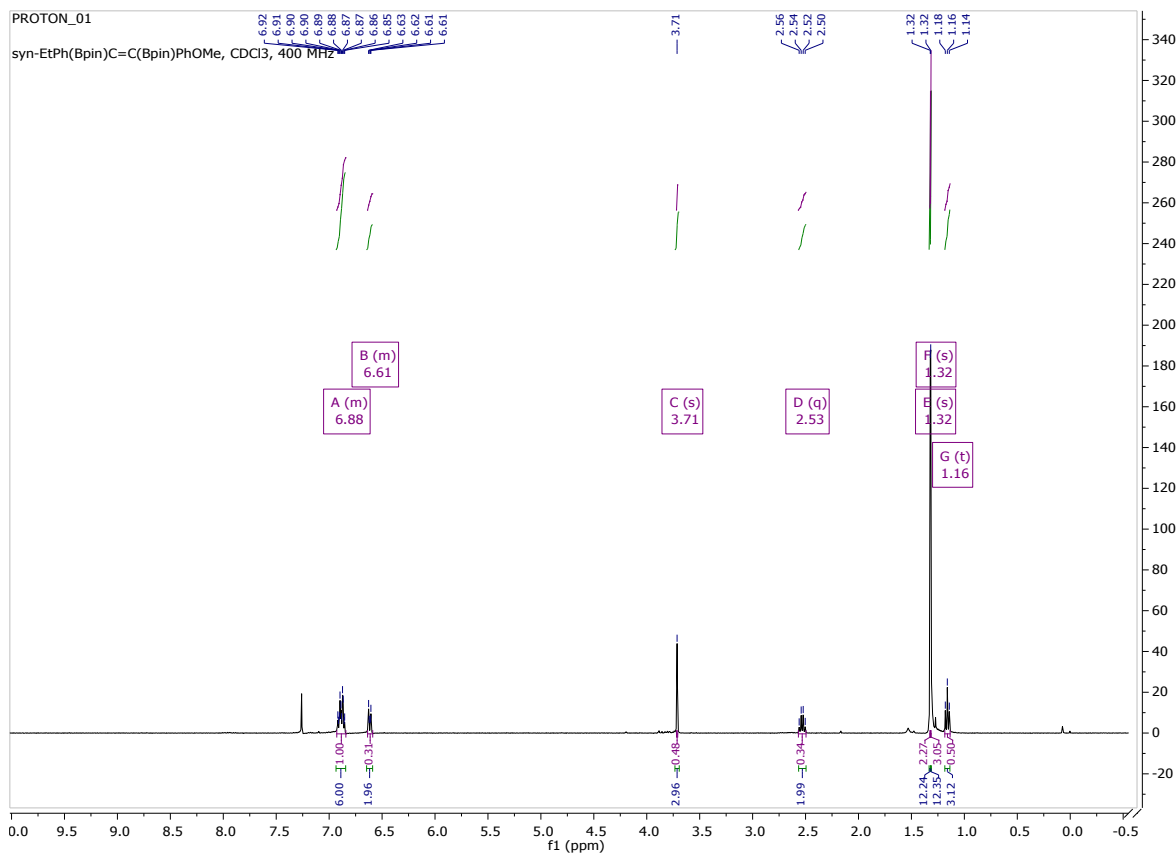

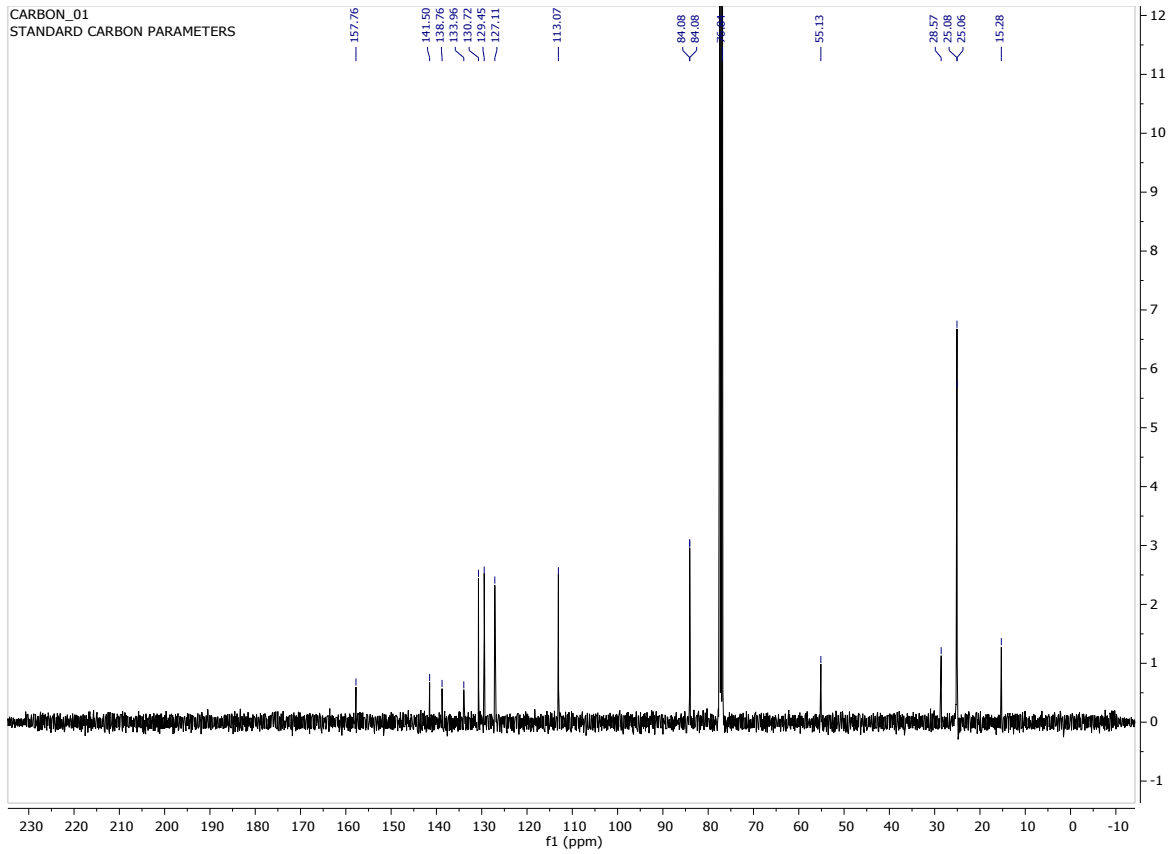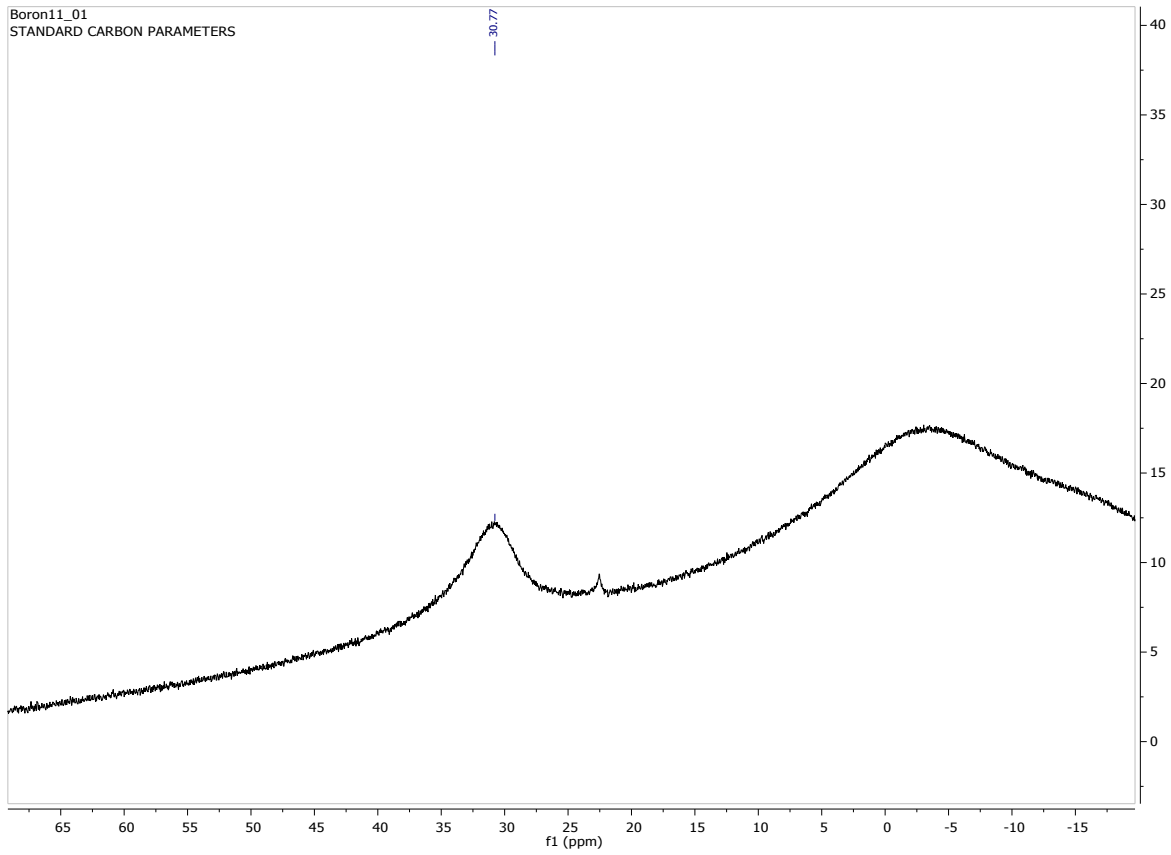



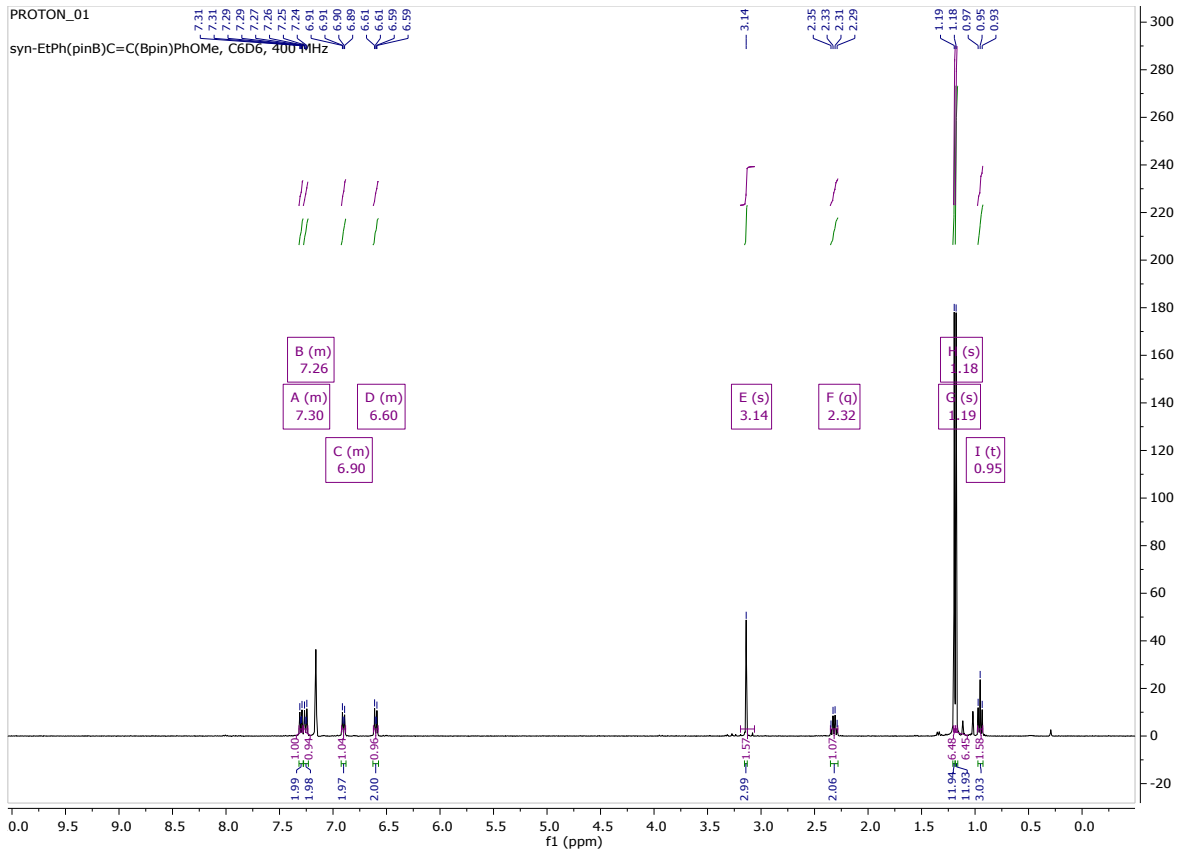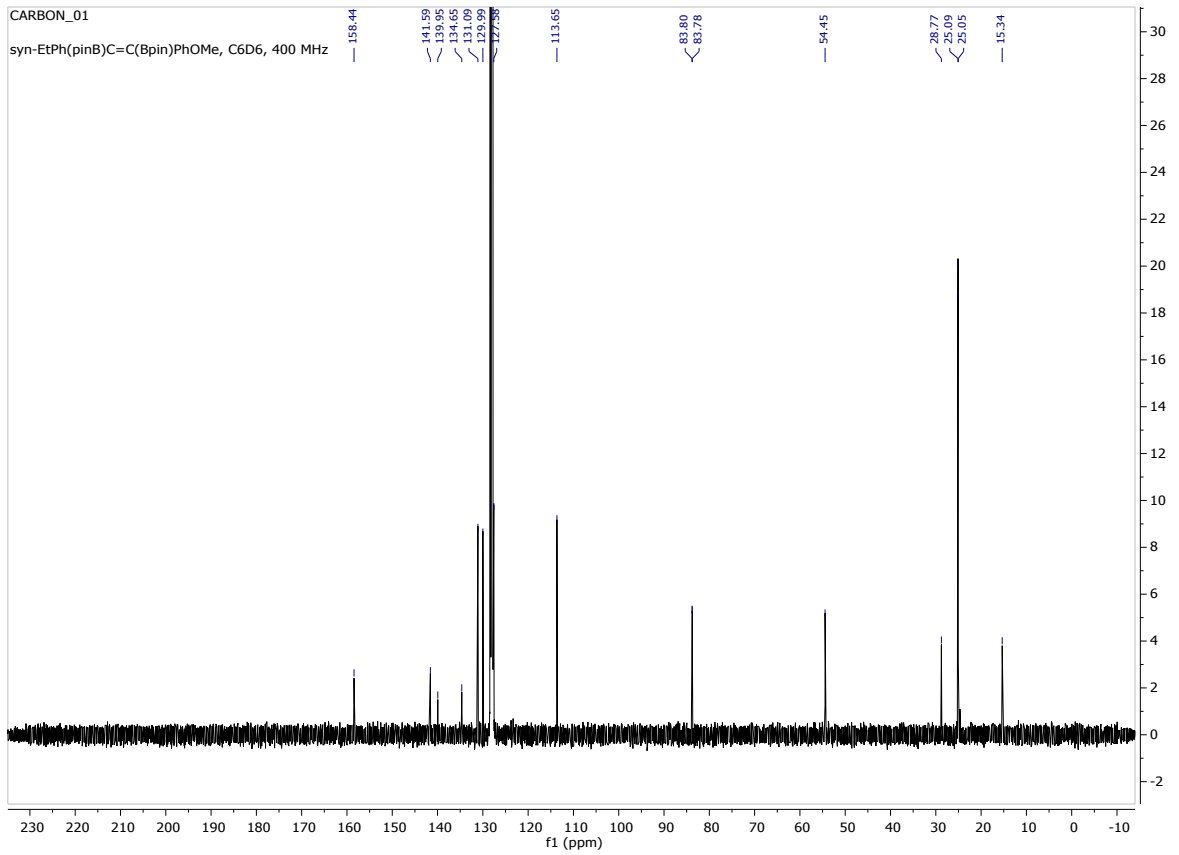

Boron11\_01  
STANDARD CARBON PARAMETERS

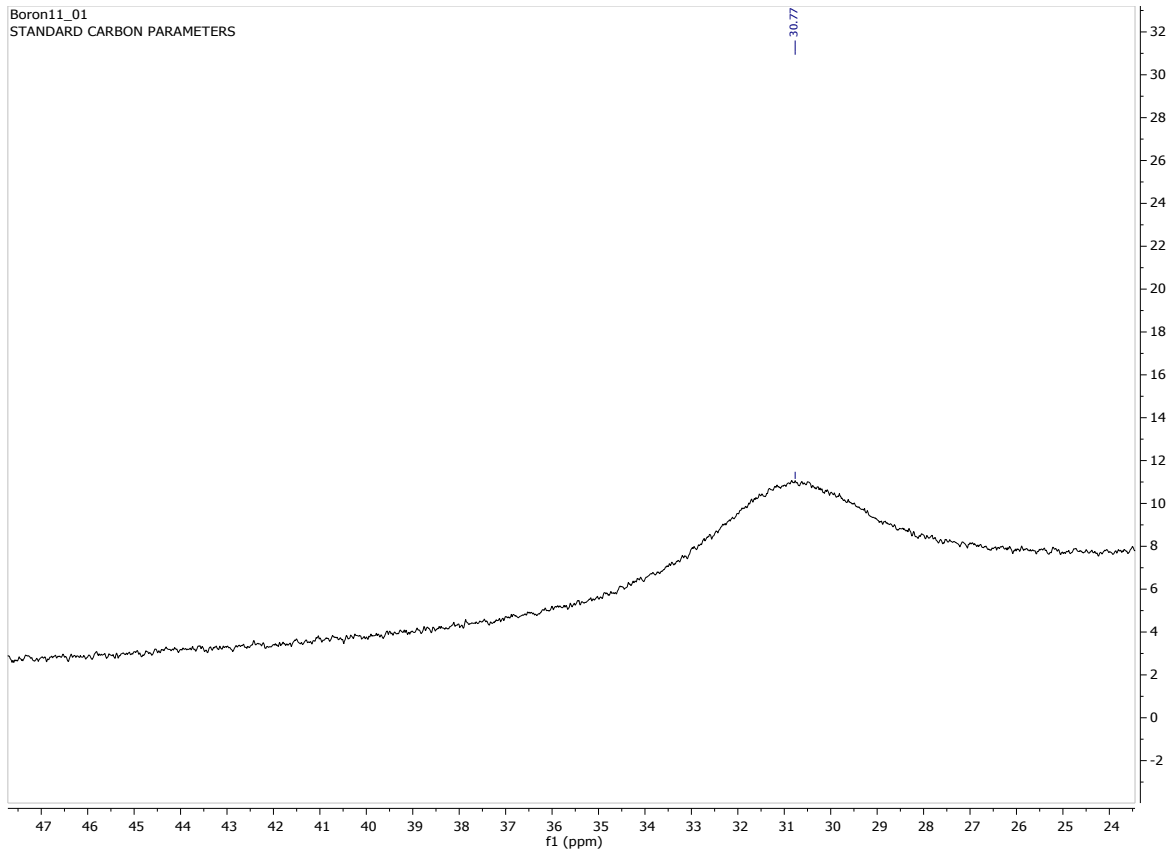

NOESY\_01  
MBA2373P

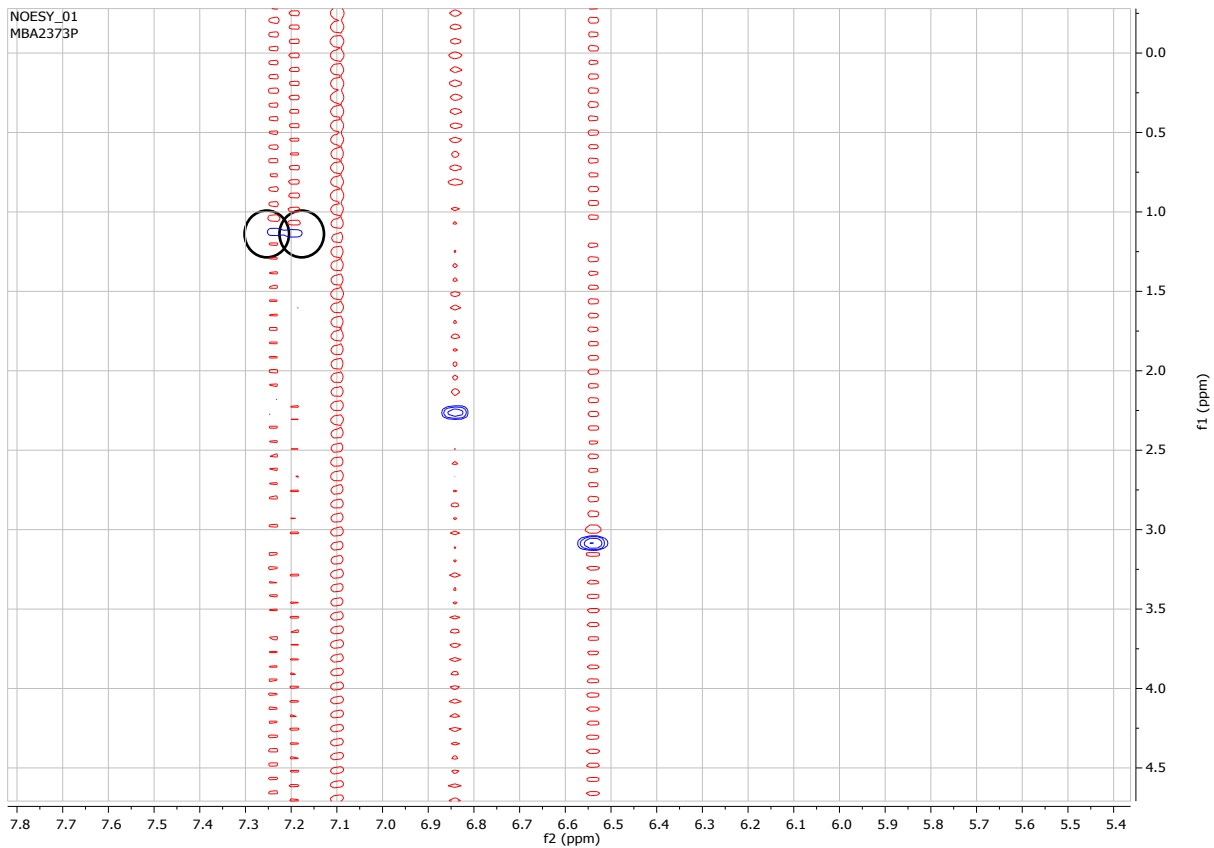

(Z)-2,2'-(1-(naphthalen-1-yl)-2-phenylethene-1,2-diyl)bis(4,4,5,5-tetramethyl-1,3,2-dioxaborolane)

(13)

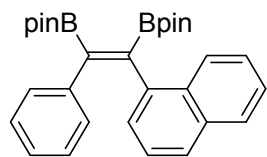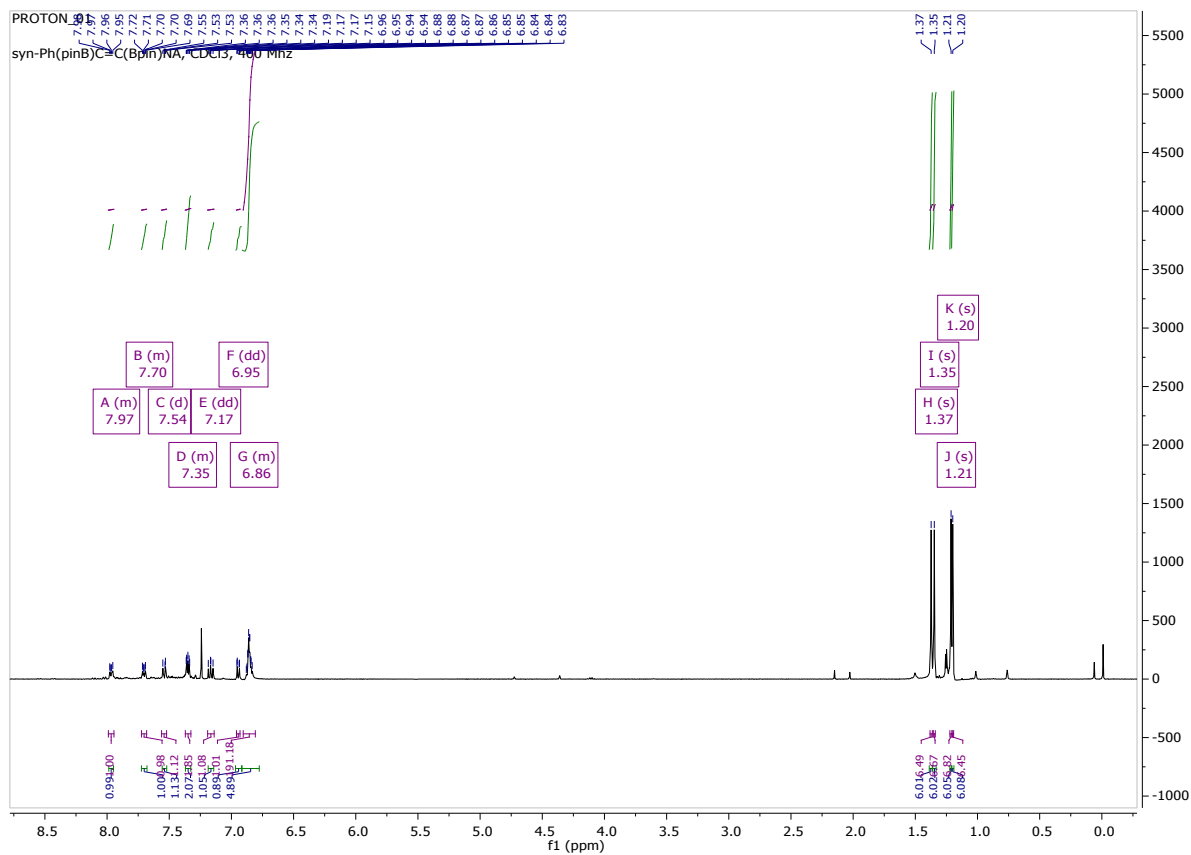

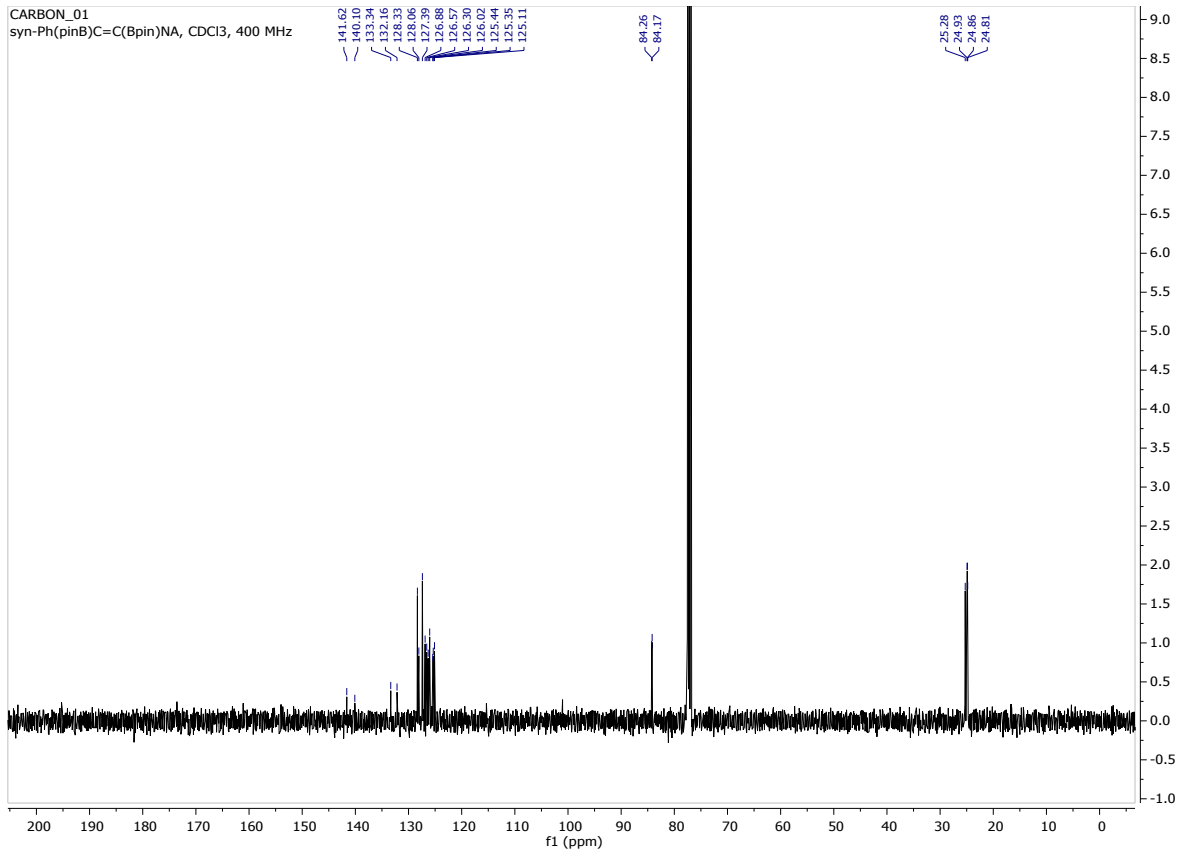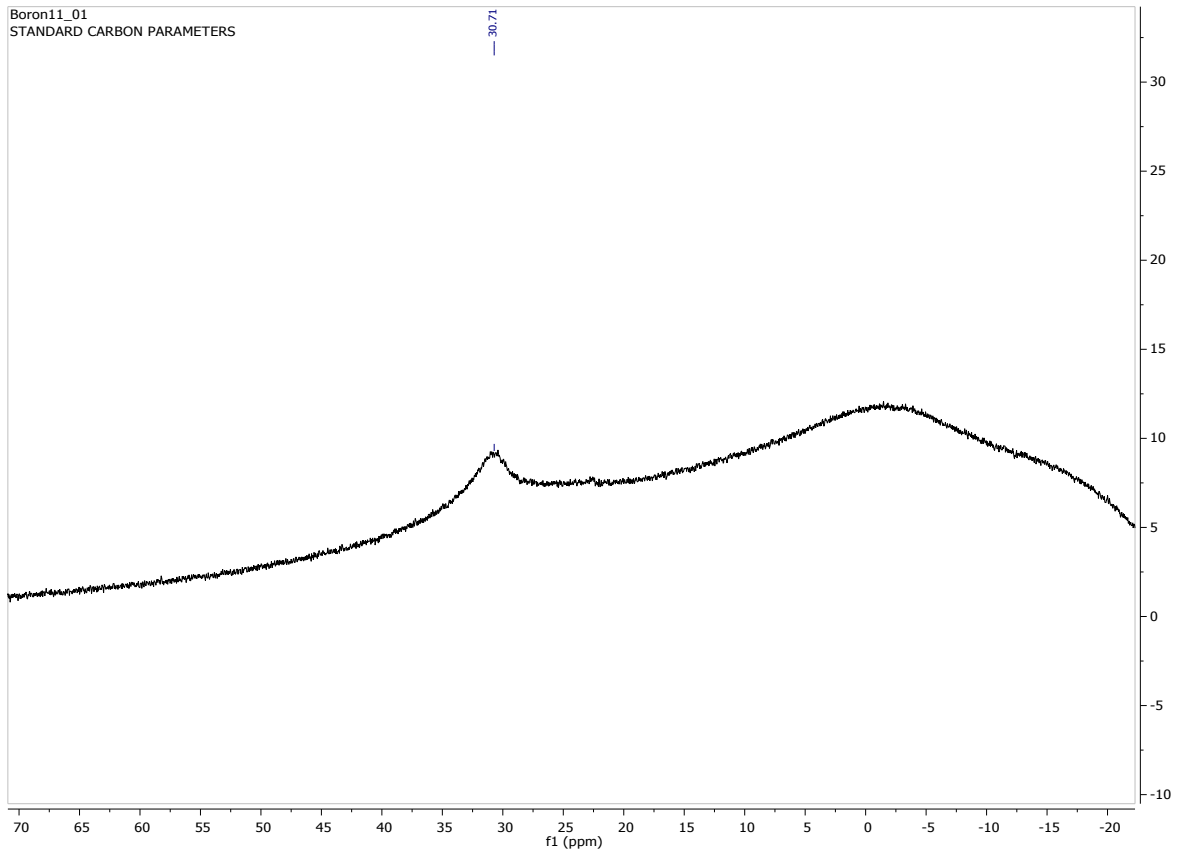

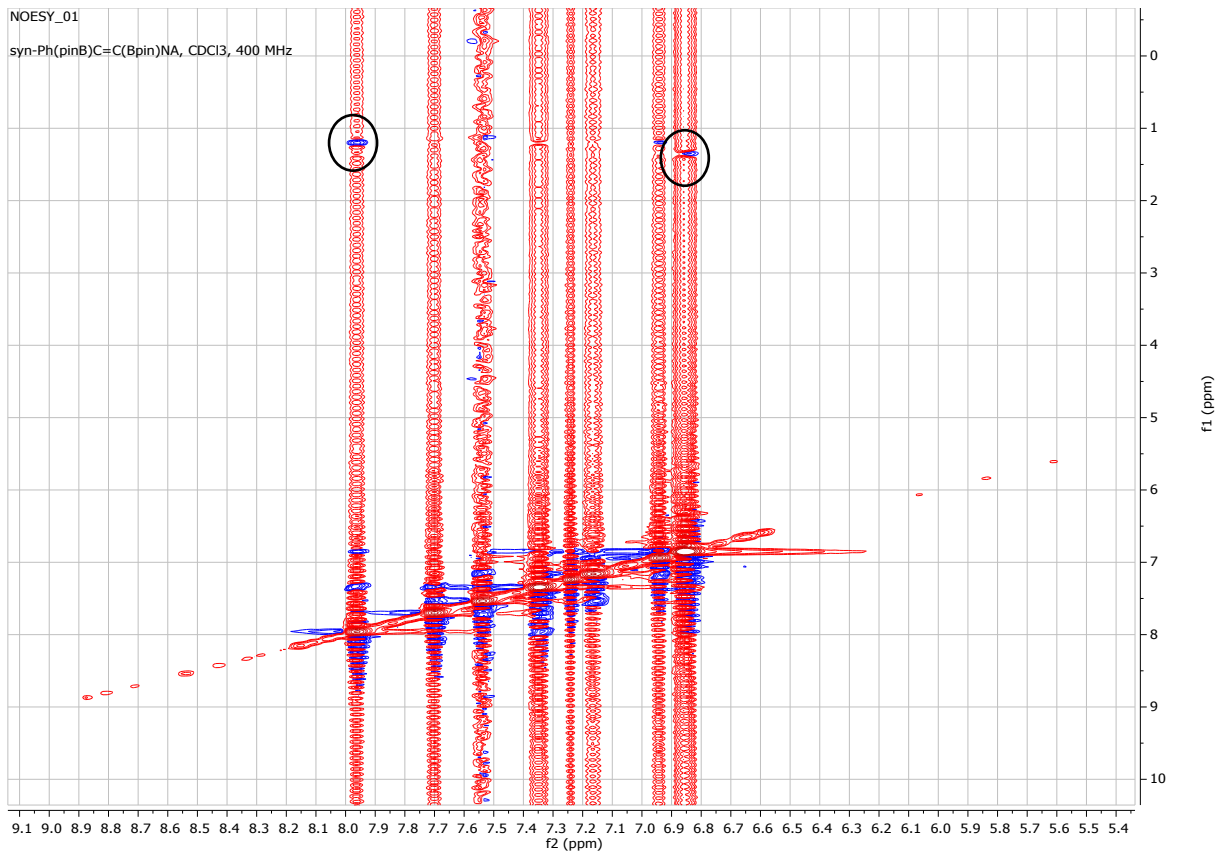

**(Z)-trimethyl(2-phenyl-1,2-bis(4,4,5,5-tetramethyl-1,3,2-dioxaborolan-2-yl)vinyl)silane (14)**

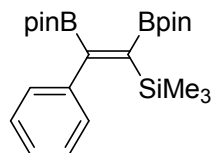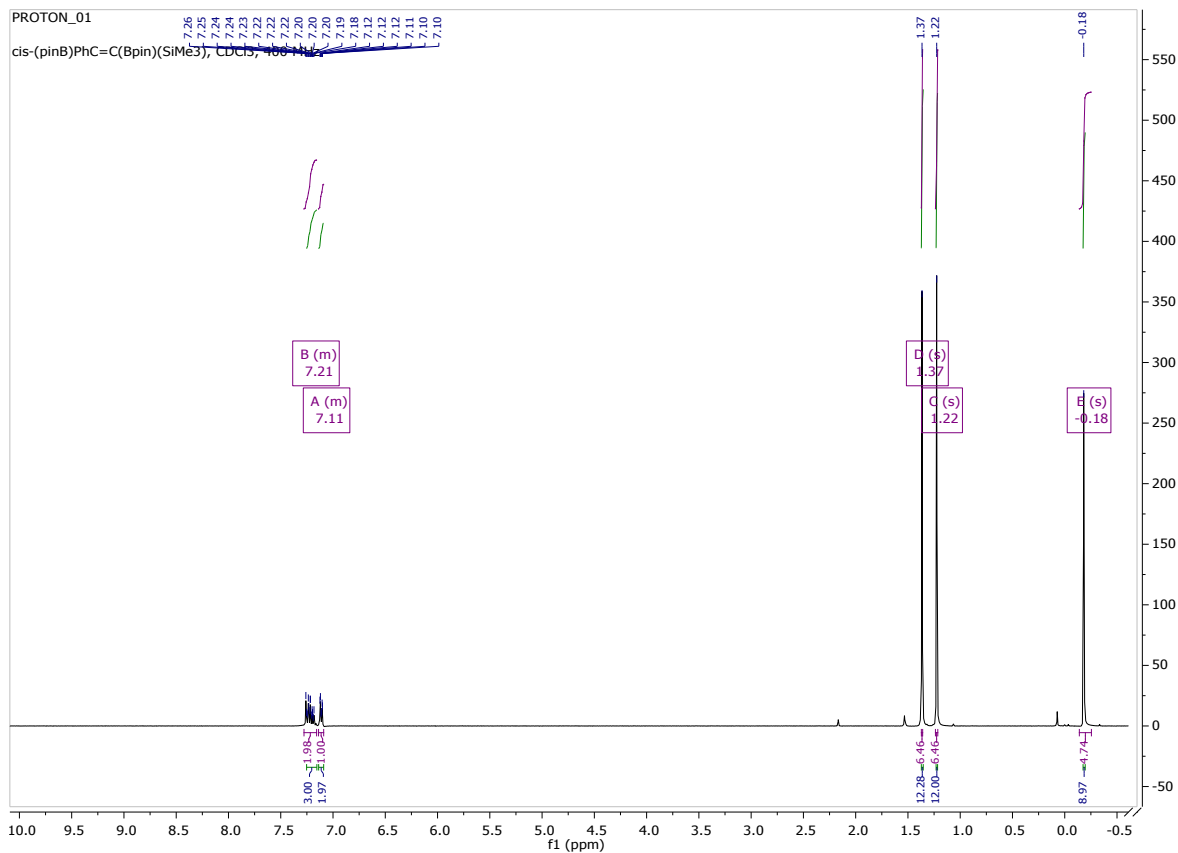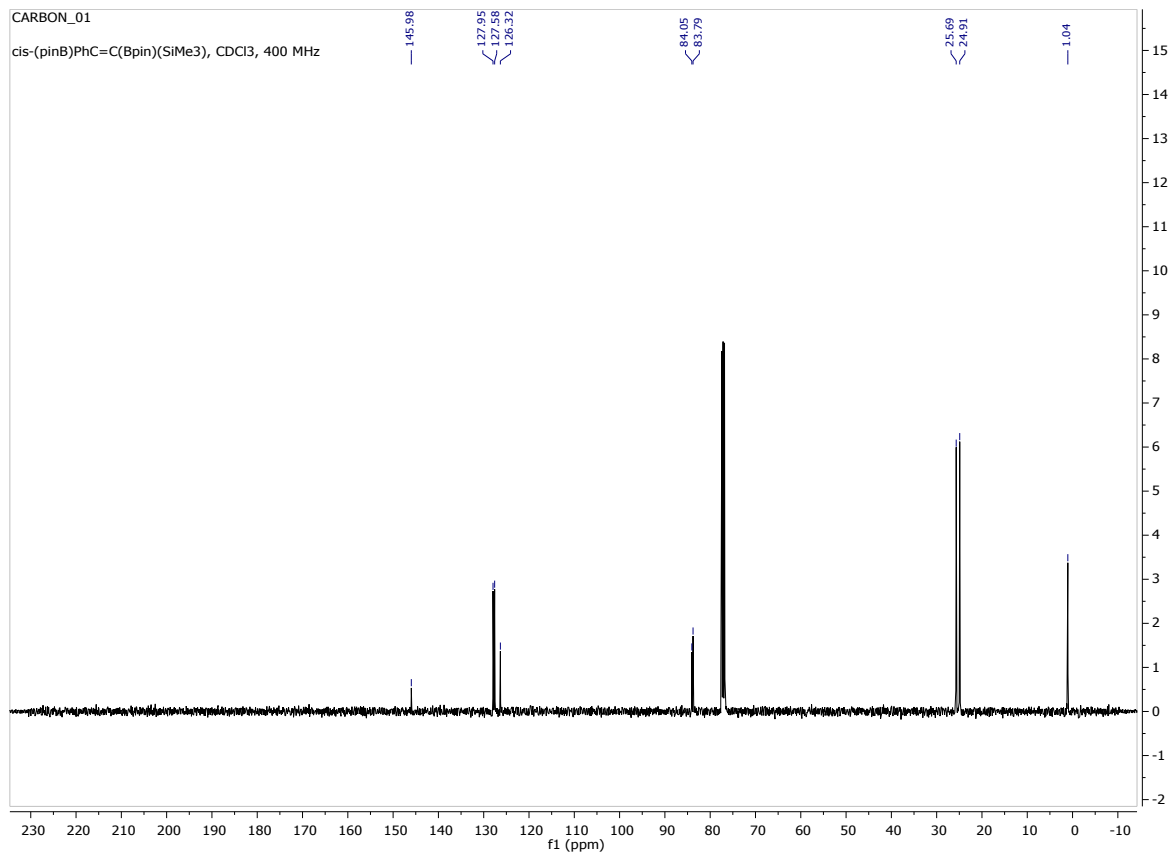

Boron11\_01  
STANDARD CARBON PARAMETERS

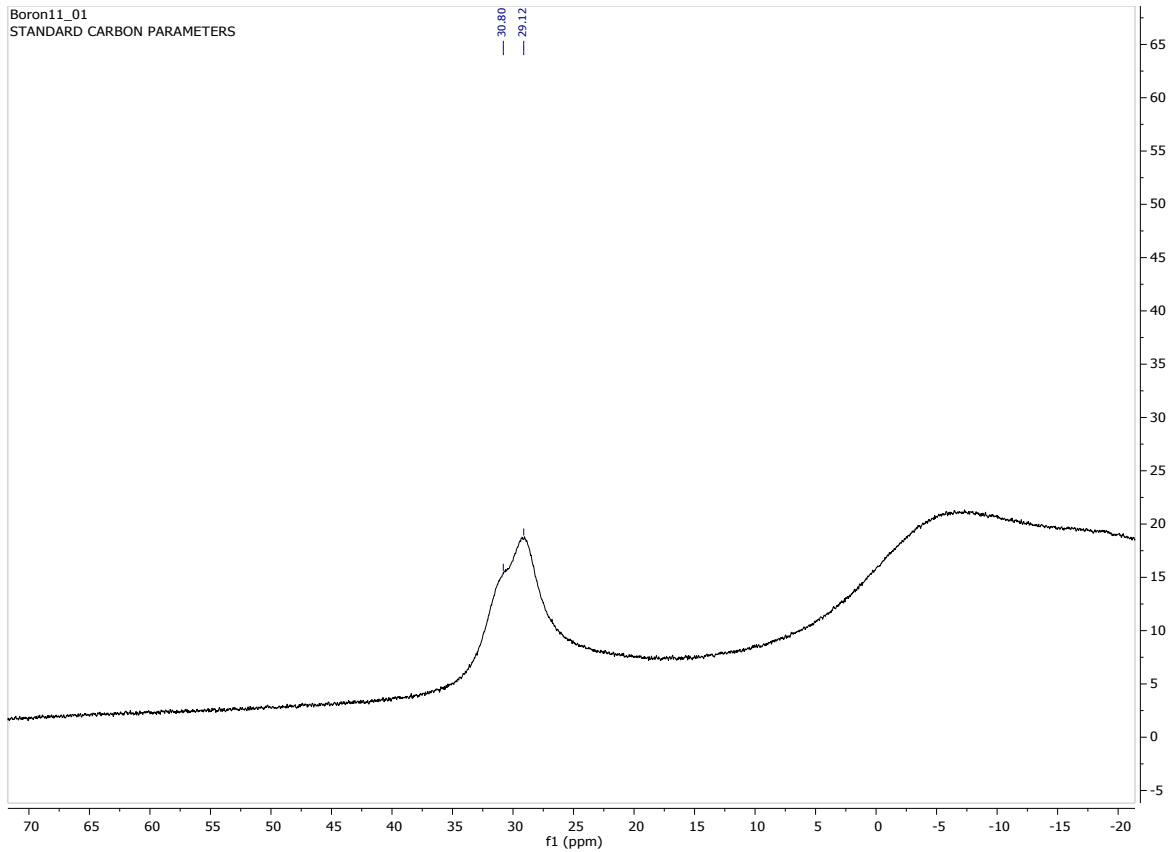

Silicon29\_01  
STANDARD CARBON PARAMETERS

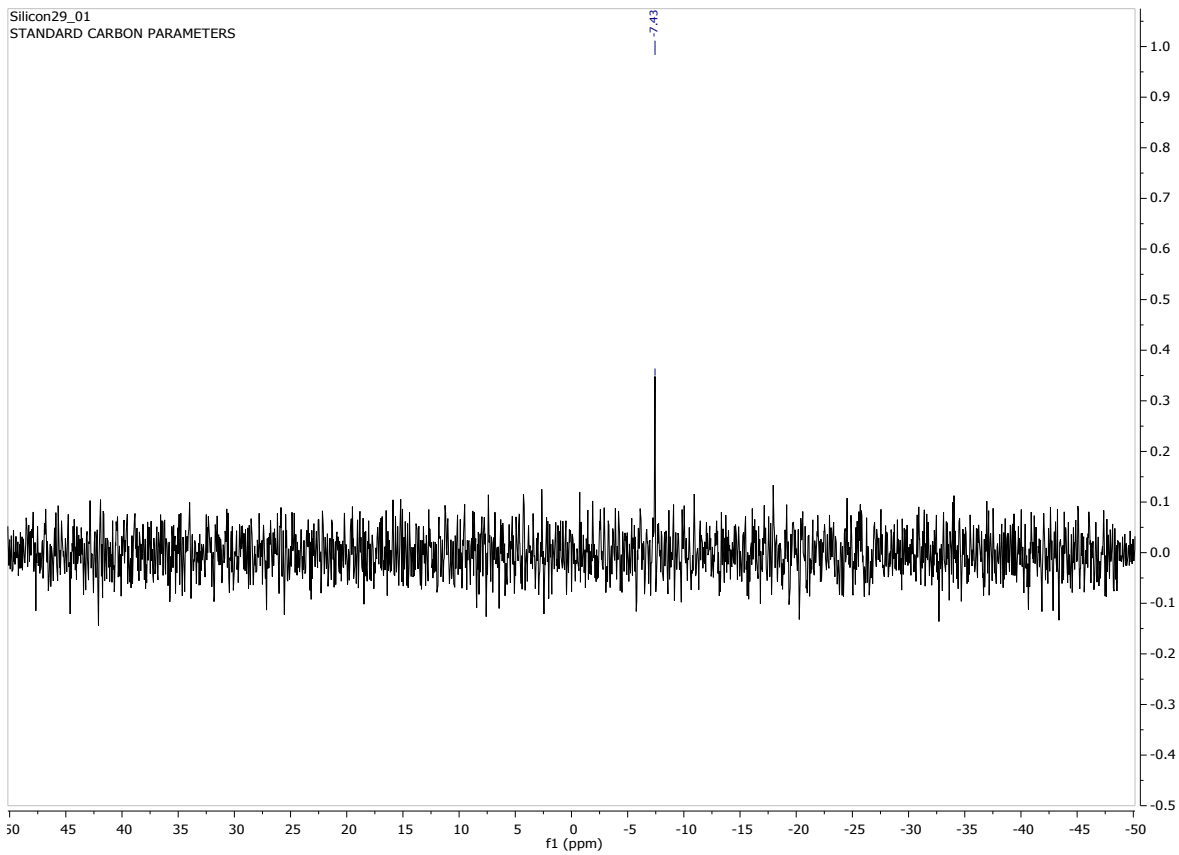

**(Z)-2,2'-(oct-4-ene-4,5-diyl)bis(4,4,5,5-tetramethyl-1,3,2-dioxaborolane) (15)**

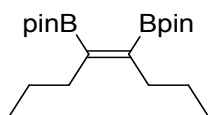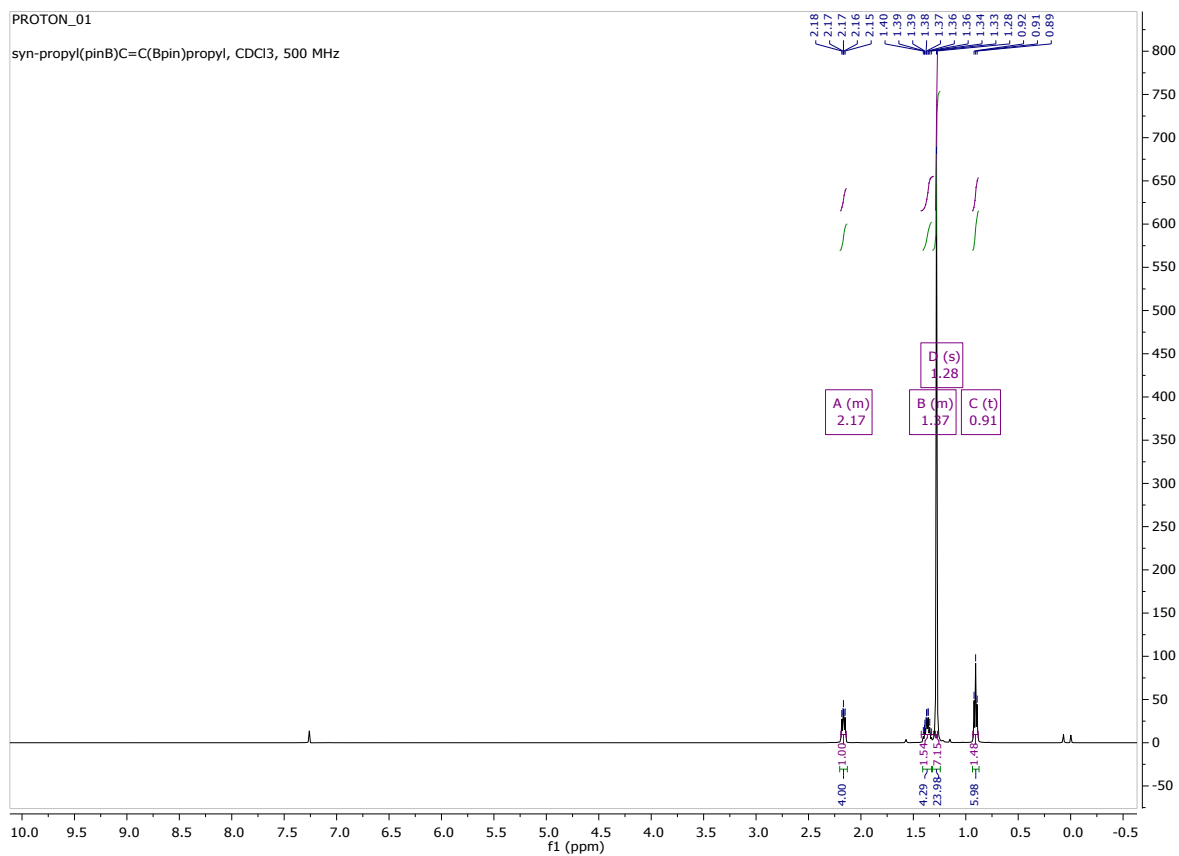



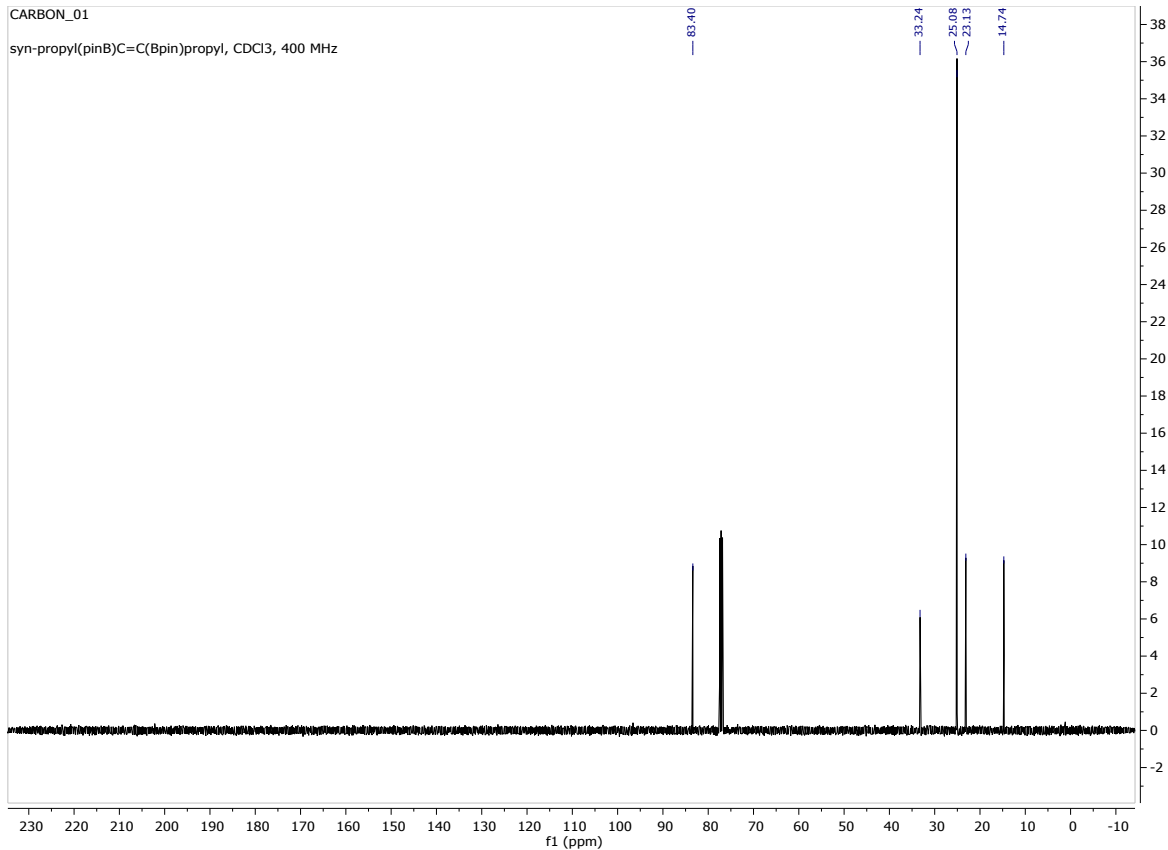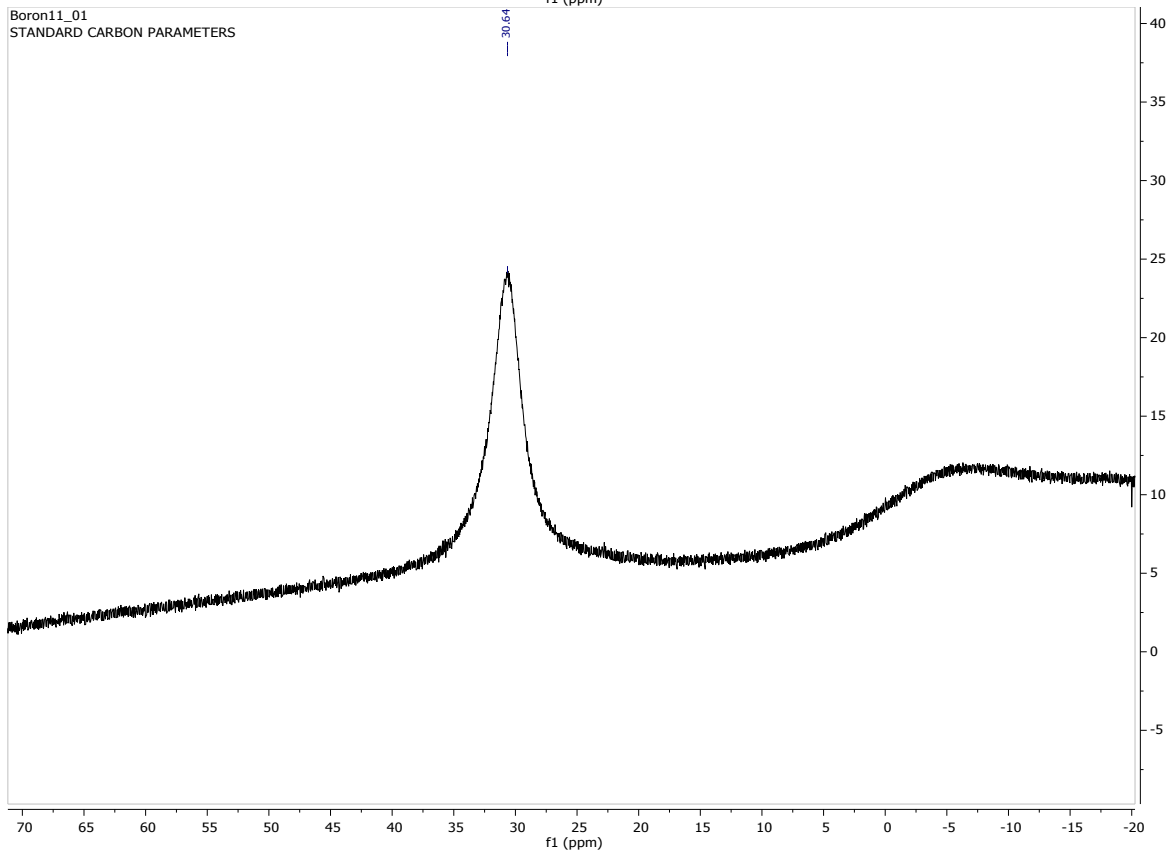

## DFT CALCULATIONS

**Methods.** Calculations were based on the Density Functional Theory (DFT) using Gaussian 09 suite of programs (revision D1).<sup>1</sup> Reactants, products, transition states and intermediates were fully optimized in the gas phase with the local functional exchange-correlation M06-L, suitable for description on thermochemical kinetics of organometallic compounds.<sup>2</sup> The standard 6-31G(d,p) basis set was adopted for lighter atoms, while the basis set with effective core potential SDD<sup>3</sup> (ECP-SDD) was used for the palladium atom (Pd). These basis set approaches are referred to as 6-31G(d,p) SDD(Pd). Frequencies calculations were also performed at the M06-L/BSI level of theory in order to verify the nature of transition states and minima along the reaction mechanism. The Intrinsic Reaction Coordinate (IRC)<sup>4</sup> method was also used to further authenticate the transition states at the same level of theory. Solvent effects were introduced through the SMD<sup>5</sup> continuum solvation method by single-point calculations at geometries optimized on the gas phase using the method M06-L/BSI.<sup>6</sup> To refine the energetic results, the SMD single-points were performed using the Ahlrichs *et al.*<sup>7</sup> quadruple- $\zeta$  (def2-QZVP) basis set combined with ECP-SDD for Pd and the 6-311++G(2d,p) basis set for the remaining atoms (BSII). All quoted free energies (298,15 K) in the benzene ( $\epsilon = 2.2706$ ) solution were calculated through the SMD method by single-point calculations at the M06/BSII level on the optimized geometries in the gas phase obtained at M06-L/BSI level of theory. Analogously, Boeser *et al.* performed the same combination of M06 suite density functional in order to investigate the mechanism of palladium-catalyzed addition reaction of arylboronic acids to enone substrates.<sup>8</sup>

**Results.** Initially, the geometry of **1** was optimized at M06-L/BSI level of theory and compared to X-ray diffraction data.<sup>9</sup> The optimized Pd-alkyne bond lengths Pd-C1 and Pd-C6 are longer, around 0.01 Å, than the results obtained by X-ray data. Both bond angles C6-C1-C5 and C1-C6-C25 are equal to 147.1°, in excellent agreement with the experimental values of 147.5(3)° and 146.03(3)°, respectively (Figure S1).

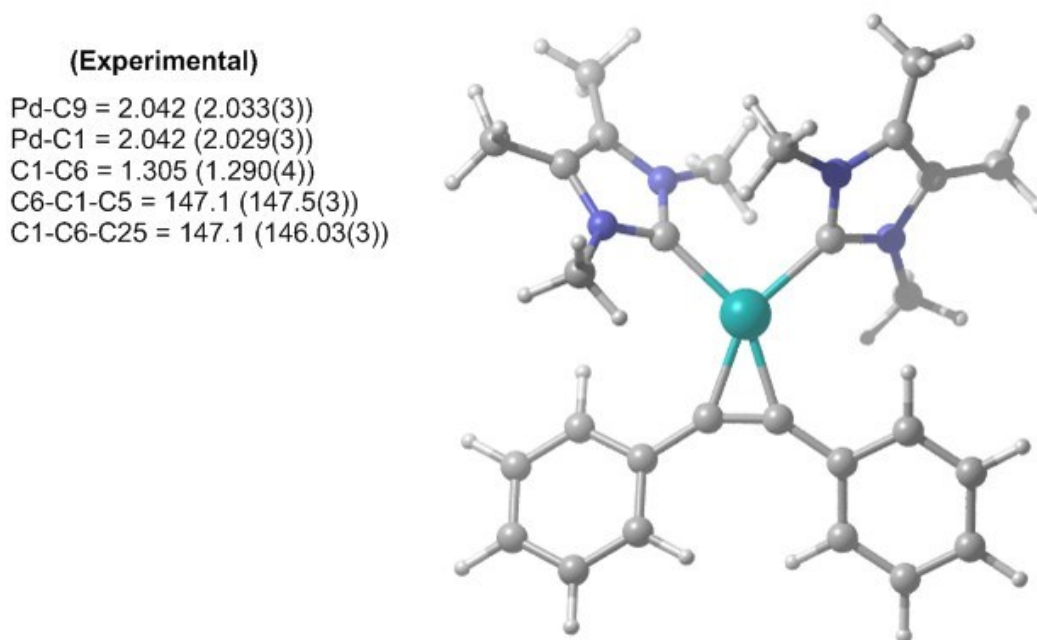

**Figure S1.** The optimized structure of **1** at M06-L/BSI level of theory. A comparison of theoretically and experimentally calculated bond lengths (Å).

The oxidative addition of bis(pinacolato)diboron to **1** begins with the dissociation of the alkyne from the  $\eta^2$ -complex, resulting in the formation of the 14 electron complex **II**. (Figure 2) This dissociation is favorable at 6.4 and 3.5 kcal·mol<sup>-1</sup> for the NHC and PMe<sub>3</sub> complexes, respectively. The reaction continues through the incorporation of bis(pinacolato)diboron in the coordination sphere of **II**, achieving the intermediate **I2**. The transition state **TSOA1** represents the step where the B-B bond is cleaved with

concomitant formation of two  $\sigma$  Pd-B bonds. This process has a free energy activation barrier relative to the separated reactants at  $\Delta G^\ddagger = 9.7$  kcalmol<sup>-1</sup> for the NHC and 11.1 kcalmol<sup>-1</sup> for the PMe<sub>3</sub> bis-ligand complexes. These reaction barrier weights suggest that the oxidative addition for the phosphines is kinetically less favored than with NHC ligands. Bis(boryl)palladium(II) complex (**I3**) is the product of the oxidative reaction step for both systems, and, energetically, is 8.7 kcalmol<sup>-1</sup> and 6.5 kcal.mol<sup>-1</sup> above the reactants with NHC and PMe<sub>3</sub> ligands, respectively. Alternatively, the oxidative addition step could proceed through the mono-ligand complexes as depicted in Figure S2.

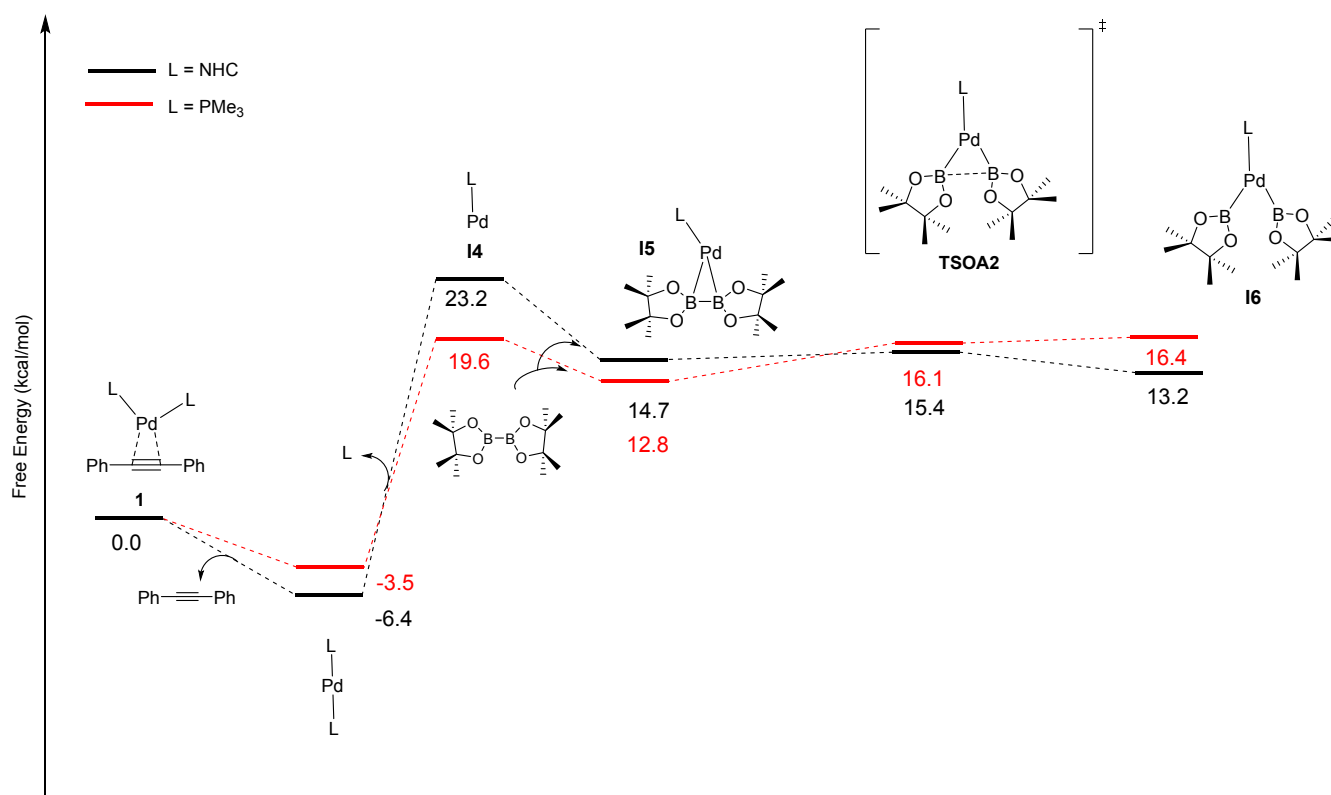

**Figure S2.** Free energy profile (in kcal mol<sup>-1</sup>) for the oxidative addition pathways with mono-ligand pathways. Free energies in kcal•mol<sup>-1</sup> at 298.15K

The next step is the alkyne insertion on the metal center. The first proposal is that the insertion of alkyne occurs directly to the bis(boryl)palladium(II) complex **I3** (Scheme S1). The 18-electron alkyne-palladium(II) complex **I7** is formed with a nearly square based pyramidal geometry for NHC ligand. This penta-coordinate configuration provides instability for the intermediate **I7** leading to large free energy compared to the complex **I3** (41.7 kcal·mol<sup>-1</sup> for the NHC ligands). When L = PMe<sub>3</sub> is not observed the coordination of the alkyne to the Pd center to form the complex **I7**. This result was confirmed by Intrinsic Reaction Coordinate (IRC) calculations from **TSIA1** (see Figure S3). The complex **I7** follows the 18-electron rule, thus it was expected a more stable complex with the presence of an alkyne. However, the steric repulsion among the ligands and the entropic penalty contributed to an increase in the instability of complex **I7**. Enthalpies in solution energies were also taken in account in order to examine the impact of the entropic contribution on the energy barriers. In the sequence, the product of the alkyne insertion can be obtained through the penta-coordinate transition state **TSIA1** to form the complex **I8**. The migratory insertion of alkyne to Pd-B bond occurs by a free activation energy at  $\Delta G^\ddagger = 48.8$  kcal mol<sup>-1</sup> for L = NHC and at  $\Delta G^\ddagger = 36.5$  kcal mol<sup>-1</sup> for L = PMe<sub>3</sub>. Palladium(II) complex **I8** returns to a square planar, 16-electron configuration, decreasing the free energy by *ca.* 48 kcalmol<sup>-1</sup> for NHC and 39 kcalmol<sup>-1</sup> for PMe<sub>3</sub> systems. Even though the phosphine ligands are favored in this reaction pathway, both routes have high free energy activation barriers relative to separate reactants. Another possibility for the insertion of the alkyne proceeds via a dissociate pathway. Kinect results on Pt(0)-catalyzed diboration reactions with phosphine ligands suggested that the alkyne insertion occurs from the three-coordinate species in the oxidative addition. Following this, it is a reasonable assumption that the dissociation of one L takes place from complex **I3** to generate the mono(boryl)palladium(II) complex **I6**. See Figure S4 for the overall catalytic cycle.

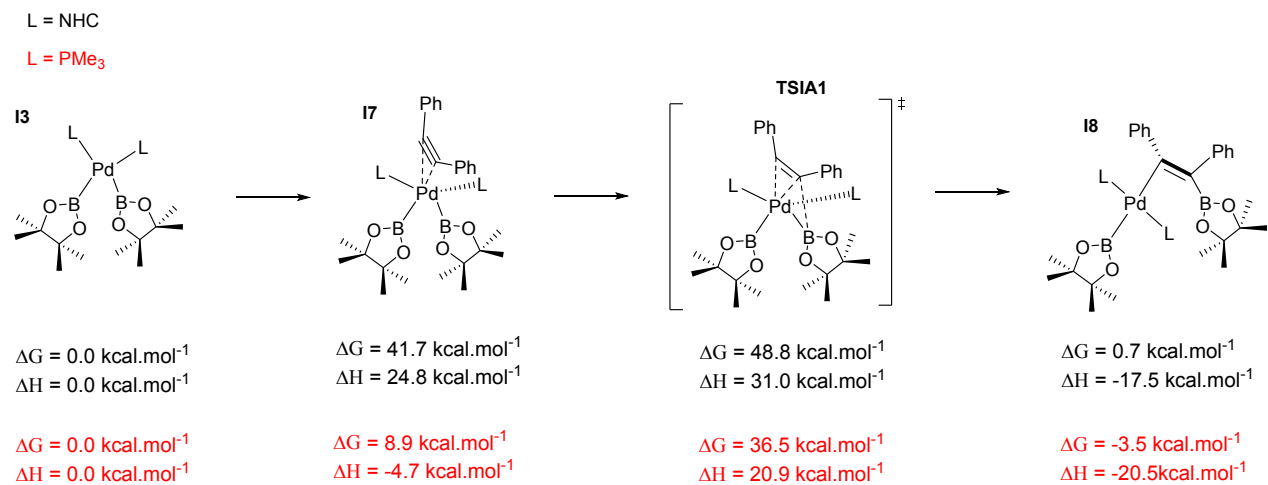

**Scheme S1** . Associative pathway for the alkyne insertion (relative free energies and enthalpies in kcalmol<sup>-1</sup>).

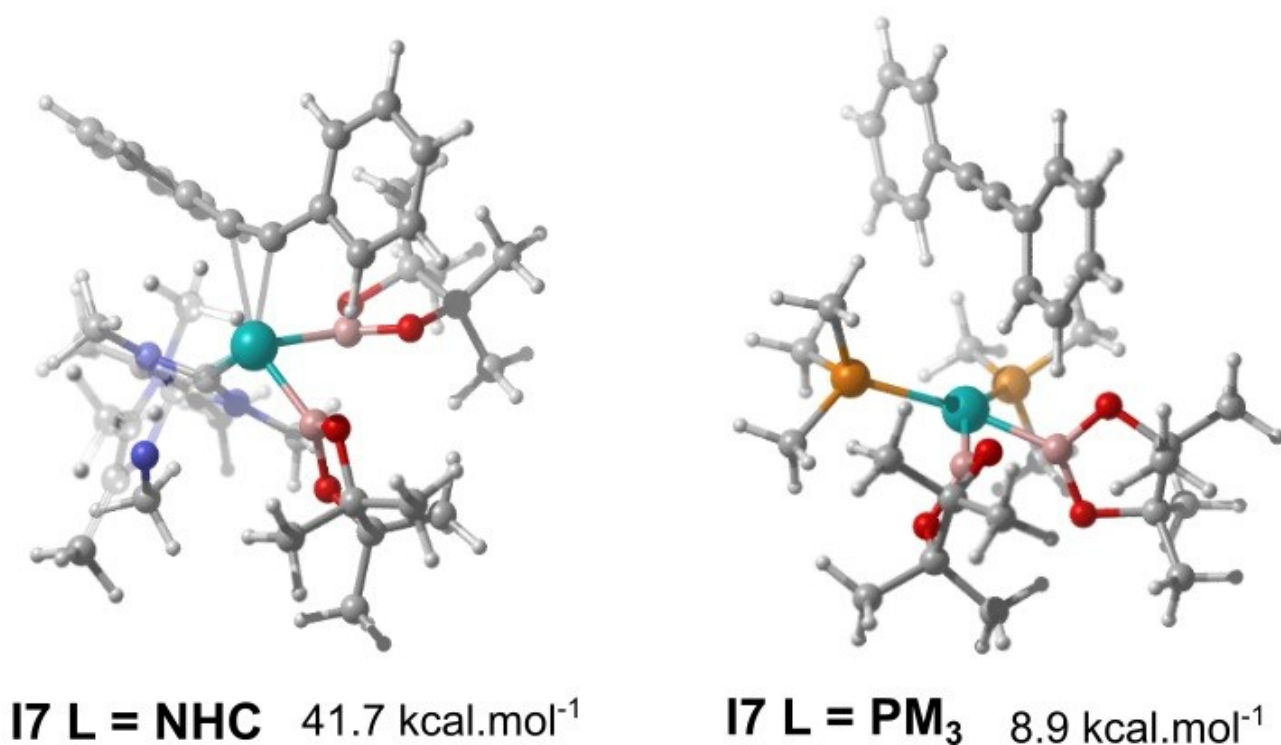

**Figure S3.** Optimized structure of the intermediate **I7** with L = NHC (left) and L = PM<sub>3</sub>(right). The stationary points were confirmed by IRC<sup>4</sup> calculations from TSIA1. Free energies in kcal•mol<sup>-1</sup> at 298.15K.

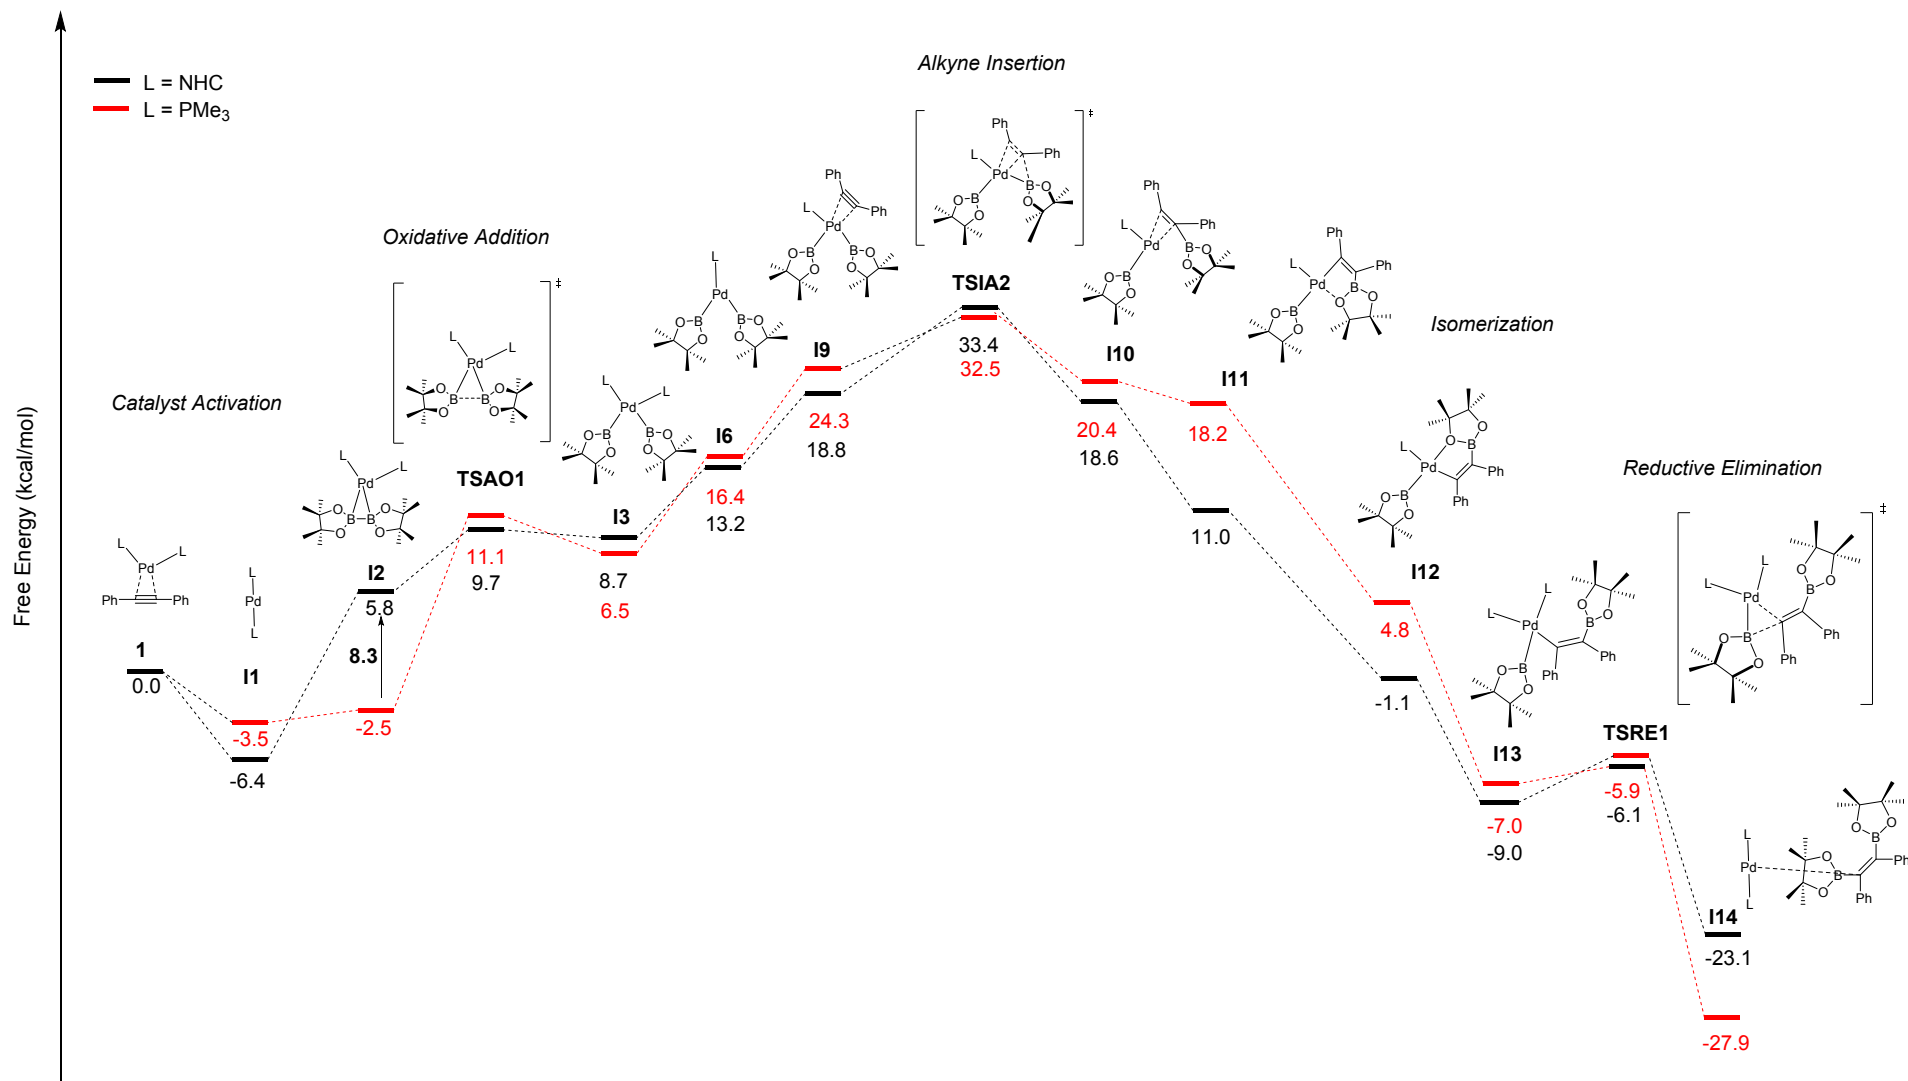

**Figure S4.** Free energy profile of the overall catalytic cycle for Pd(0)-catalyzed diboration of alkyne supported by NHC ligand. All free energies are given in  $\text{kcal}\cdot\text{mol}^{-1}$  at 298.15 K and relative to separate reactants.

The insertion step itself begins with the formation of the  $\eta^2$ -alkyne complex **I9** for both systems, NHC and  $\text{PMe}_3$  ligands. The free energy activation barrier of the migratory insertion of alkyne is estimated at  $\Delta G^\ddagger = 33.4 \text{ kcal mol}^{-1}$  for NHC and  $\Delta G^\ddagger = 32.5 \text{ kcal mol}^{-1}$  for the  $\text{PMe}_3$  ligands (Figure S4). The transition state **TSIA2** is associated to the migratory insertion of alkyne with one ligand attached on metal center. The alkyne triple bond and the Pd-B bonds are broken forming a new C-B bond in the intermediate **I10**. The 14-electron palladium(II) complex **I10** has a vacant site that can interact with an oxygen atom, allowing the Bpin group to rotate around the B-C bond. The coordination of the oxygen in the ligand contributes to the stabilization of the positive central palladium(II) in **I11**. The intermediate **I11** is stabilized by  $\Delta\Delta G = 7.6 \text{ kcal mol}^{-1}$  for the NHC and  $\Delta\Delta G = 2.2 \text{ kcal mol}^{-1}$  for  $\text{PMe}_3$  systems, compared to **I10**. Complex **I11** has a nearly planar structure in relation to the metal center, with the pinacolato and the allyl ligands in a *trans* orientation. However, a *cis* orientation between these two ligands is necessary in order to allow the reductive elimination step, and therefore a *cis-trans* isomerization process involving intermediates **I11** and **I12** should occur. One could assume that the isomerization process would take place through a tetrahedral transition state although we were unable to find the transition state corresponding to this *cis-trans* isomerization. Nevertheless, it is well known that tetrahedral arrangements involving  $d^8$  palladium(II) are usually very unstable. Probably, the planar isomerization occurs through a rotation around the Pd-B bond, similarly to that suggested by Cui and co-workers in mechanistic studies on the Pt(0)-catalyzed diboration alkyne reaction.<sup>10b</sup> The profile energy of the alkyne insertion pathway with a ligand attached on metal is analogous for NHC and  $\text{PMe}_3$  systems. The results discussed so far suggest that the reductive elimination should occur from the *cis* complex **I12**. The re-coordination of other ligand is reasonable, since the 16-electron configuration is achieved forming the palladium(II) complex **I13** with a square planar geometry. The free energy barrier from **I13** is computed at  $\Delta G^\ddagger = -6.1 \text{ kcal mol}^{-1}$  for NHC and  $-5.9 \text{ kcal mol}^{-1}$  for  $\text{PMe}_3$  via transition state **TSRE1** (Figure S4). The second C-B bond is formed in complex **I14** and the 1,2-diborated product is ready to be released.



Diborations of unsaturated compounds catalyzed by transition-metal complexes play an important role in the synthesis of organoboron compounds<sup>11-13</sup> and density Functional Theory (DFT) has been used with success for the description of these reaction mechanisms. Several examples recently reported in the literature shown free energy barriers above 20 kcal.mol<sup>-1</sup>. Nagashima et al.<sup>14</sup> studied a trans-diboration of alkynes by designing a pseudo-intramolecular reaction. Using an anionic strategy, the activation barrier of the addition of boryl anion was significantly lowered comparing to other approach (23.2 kcal/mol against 51.9 kcal/mol). Liu et al.<sup>15</sup> detailed the mechanism for the Pt diimine catalyzed diboration of acyclic  $\alpha,\beta$ -unsaturated carbonyl compounds. The oxidative addition step in such reaction has energy barriers of approximately 25.0 kcal/mol. For the insertion step, barriers from 24.4 kcal/mol to 38.3 kcal/mol were observed depending on the studied pathway. Xie et al.<sup>16</sup> elucidate the mechanisms for the Ni- and Pd- catalyzed cycloaddition of anhydride to alkyne using phosphines as ligands. The most favorable pathway for the addition and decarboxylation steps catalyzed by Pd presented barriers equal 28.6 and 21.7 kcal/mol, respectively. In summary, the results reported in the present work have shown to be in agreement with many other analogous studies reported recently.

**CARTESIAN COORDINATES, IMAGINARY FREQUENCIES, SCF ENERGIES,  
ENTHALPIES AND FREE ENERGIES (AT 298.15 K AND 1 ATM) FOR THE REACTANTS,  
PRODUCTS, INTERMEDIATES AND TRANSITION STATES.**

**(Imaginary frequencies for the transition states at M06-L/BS1 level of theory).**

**Bpin**

**M06-L/BSI SCF energy in gas: -822.460971 a.u.**

**M06/BSII SCF energy in benzene: -822.2648766 a.u.**

**M06/BSII//M06-L/BSI free energy in benzene: -821.945549 a.u.**

**M06/BSII//M06-L/BSI entalphy in benzene: -821.879960 a.u.**

|   |              |              |              |
|---|--------------|--------------|--------------|
| B | 0.842953000  | -0.001068000 | -0.000060000 |
| B | -0.842971000 | -0.001062000 | -0.000033000 |
| O | -1.605018000 | -1.108113000 | 0.290439000  |
| O | -1.603870000 | 1.106821000  | -0.290560000 |
| O | 1.605026000  | -1.108100000 | -0.290539000 |
| O | 1.603831000  | 1.106827000  | 0.290487000  |
| C | -2.980136000 | -0.656704000 | 0.419570000  |
| C | -2.979464000 | 0.656860000  | -0.419674000 |
| C | 2.980155000  | -0.656716000 | -0.419538000 |
| C | 2.979421000  | 0.656887000  | 0.419654000  |
| C | -3.897867000 | -1.746004000 | -0.096143000 |
| H | -3.813230000 | -2.634486000 | 0.534870000  |
| H | -4.942458000 | -1.416603000 | -0.074646000 |
| H | -3.647706000 | -2.034755000 | -1.118570000 |

|   |              |              |              |
|---|--------------|--------------|--------------|
| C | -3.221923000 | -0.412469000 | 1.902467000  |
| H | -2.997811000 | -1.325671000 | 2.459214000  |
| H | -2.573272000 | 0.382458000  | 2.282231000  |
| H | -4.261076000 | -0.134018000 | 2.102853000  |
| C | -3.896090000 | 1.747073000  | 0.096072000  |
| H | -3.810547000 | 2.635455000  | -0.534951000 |
| H | -4.941019000 | 1.418735000  | 0.074596000  |
| H | -3.645611000 | 2.035570000  | 1.118490000  |
| C | -3.221557000 | 0.412903000  | -1.902581000 |
| H | -4.261000000 | 0.135539000  | -2.102962000 |
| H | -2.996488000 | 1.325876000  | -2.459316000 |
| H | -2.573742000 | -0.382689000 | -2.282371000 |
| C | 3.896047000  | 1.747110000  | -0.096114000 |
| H | 3.810502000  | 2.635529000  | 0.534863000  |
| H | 4.940981000  | 1.418795000  | -0.074641000 |
| H | 3.645556000  | 2.035562000  | -1.118541000 |
| C | 3.221473000  | 0.413013000  | 1.902578000  |
| H | 2.573703000  | -0.382598000 | 2.282395000  |
| H | 4.260933000  | 0.135728000  | 2.102997000  |
| H | 2.996341000  | 1.326002000  | 2.459256000  |
| C | 3.222124000  | -0.412578000 | -1.902425000 |
| H | 2.573564000  | 0.382366000  | -2.282310000 |
| H | 4.261319000  | -0.134212000 | -2.102718000 |
| H | 2.998008000  | -1.325808000 | -2.459121000 |
| C | 3.897841000  | -1.746002000 | 0.096334000  |

|   |             |              |              |
|---|-------------|--------------|--------------|
| H | 3.647554000 | -2.034699000 | 1.118744000  |
| H | 3.813245000 | -2.634506000 | -0.534649000 |
| H | 4.942447000 | -1.416630000 | 0.074949000  |

### Alkyne

**M06-L/BSI SCF energy in gas:** -539.400743 a.u.

**M06/BSII SCF energy in benzene:** -539.183729 a.u.

**M06/BSII//M06-L/BSI free energy in benzene::** -539.032244 a.u.

**M06/BSII//M06-L/BSI entalphy in benzene:** -538.981251 a.u.

|   |              |              |              |
|---|--------------|--------------|--------------|
| C | -0.609530000 | -0.042546000 | -0.002798000 |
| C | 0.609592000  | -0.046871000 | 0.003104000  |
| C | 2.026320000  | -0.025302000 | 0.002877000  |
| C | 2.769642000  | -1.220064000 | -0.000112000 |
| H | 2.241278000  | -2.169009000 | -0.000702000 |
| H | 4.718148000  | -2.114927000 | -0.005965000 |
| C | 4.157275000  | -1.184381000 | -0.003030000 |
| H | 5.916791000  | 0.059128000  | -0.005457000 |
| C | 4.830818000  | 0.035601000  | -0.002622000 |
| H | 4.625000000  | 2.179808000  | 0.001917000  |
| C | 4.105278000  | 1.225562000  | 0.001339000  |
| C | 2.717860000  | 1.200610000  | 0.004172000  |
| H | 2.147951000  | 2.125071000  | 0.006935000  |
| H | -2.152189000 | 2.127608000  | -0.004673000 |
| C | -2.720167000 | 1.201934000  | -0.002694000 |
| C | -2.026257000 | -0.022626000 | -0.000755000 |
| C | -2.767284000 | -1.218842000 | 0.001530000  |

|   |              |              |              |
|---|--------------|--------------|--------------|
| H | -2.236916000 | -2.166674000 | 0.002773000  |
| C | -4.154953000 | -1.185867000 | 0.002045000  |
| H | -4.713971000 | -2.117526000 | 0.003760000  |
| C | -4.830891000 | 0.032801000  | 0.000036000  |
| H | -5.916917000 | 0.054180000  | 0.000106000  |
| C | -4.107679000 | 1.224157000  | -0.002221000 |
| H | -4.629319000 | 2.177345000  | -0.003923000 |

**Syn-1,2-diborated product**

**M06-L/BSI SCF energy in gas:** -1361.946540 a.u.

**M06/BSII SCF energy in benzene:** -1361.521093 a.u.

**M06/BSII//M06-L/BSI free energy in benzene::** -1361.02093 a.u.

**M06/BSII//M06-L/BSI entalphy in benzene:** -1360.92932 a.u.

|   |              |              |              |
|---|--------------|--------------|--------------|
| B | 0.001369000  | 1.678322000  | -0.059342000 |
| B | -0.788109000 | -1.167263000 | -0.076404000 |
| O | 0.180959000  | 2.969799000  | 0.373713000  |
| O | -1.289245000 | 1.432057000  | -0.485081000 |
| O | -1.392791000 | -1.773785000 | -1.150652000 |
| O | -1.542132000 | -1.222487000 | 1.074056000  |
| C | 1.104586000  | 0.590970000  | -0.074547000 |
| C | 0.714120000  | -0.716414000 | -0.087888000 |
| C | -1.026005000 | 3.699475000  | 0.038610000  |
| C | -2.089875000 | 2.562590000  | -0.043279000 |
| C | -2.740488000 | -2.120071000 | -0.736491000 |
| C | -2.601888000 | -2.180715000 | 0.816229000  |
| C | 1.645375000  | -1.867345000 | 0.014472000  |

|   |              |              |              |
|---|--------------|--------------|--------------|
| C | 1.429142000  | -3.024343000 | -0.753173000 |
| C | 2.714999000  | -1.871415000 | 0.925794000  |
| H | 0.597218000  | -3.044817000 | -1.452785000 |
| H | 2.884848000  | -0.995098000 | 1.545264000  |
| C | 2.271945000  | -4.125784000 | -0.640146000 |
| C | 3.544958000  | -2.977559000 | 1.047308000  |
| H | 2.094084000  | -5.003543000 | -1.256293000 |
| H | 4.362580000  | -2.958264000 | 1.763208000  |
| C | 3.332315000  | -4.108854000 | 0.260488000  |
| H | 3.985618000  | -4.971992000 | 0.355213000  |
| C | 2.521736000  | 1.023151000  | -0.115520000 |
| C | 3.411705000  | 0.492247000  | -1.061224000 |
| C | 3.002534000  | 1.999922000  | 0.768424000  |
| H | 3.048773000  | -0.256241000 | -1.761768000 |
| H | 2.322628000  | 2.437389000  | 1.493482000  |
| C | 4.736784000  | 0.906582000  | -1.108824000 |
| C | 4.333246000  | 2.404553000  | 0.729731000  |
| H | 5.406801000  | 0.483328000  | -1.852687000 |
| H | 4.688211000  | 3.152741000  | 1.434045000  |
| C | 5.206614000  | 1.860550000  | -0.207822000 |
| H | 6.244171000  | 2.181620000  | -0.241618000 |
| C | -3.121082000 | -3.431826000 | -1.392497000 |
| H | -3.186726000 | -3.303775000 | -2.476157000 |
| H | -2.383950000 | -4.211634000 | -1.189010000 |
| H | -4.097376000 | -3.777679000 | -1.035466000 |

|   |              |              |              |
|---|--------------|--------------|--------------|
| C | -3.648951000 | -0.995303000 | -1.203855000 |
| H | -3.373684000 | -0.057772000 | -0.714477000 |
| H | -3.529095000 | -0.855937000 | -2.281208000 |
| H | -4.701519000 | -1.211609000 | -0.995614000 |
| C | -2.092421000 | -3.528266000 | 1.308636000  |
| H | -2.849318000 | -4.311822000 | 1.206161000  |
| H | -1.198734000 | -3.835100000 | 0.755395000  |
| H | -1.820274000 | -3.447332000 | 2.363828000  |
| C | -3.840114000 | -1.765783000 | 1.583108000  |
| H | -3.638744000 | -1.786121000 | 2.657306000  |
| H | -4.162609000 | -0.756669000 | 1.318054000  |
| H | -4.668720000 | -2.453584000 | 1.382277000  |
| C | -3.194540000 | 2.821202000  | -1.047298000 |
| H | -3.705051000 | 3.763121000  | -0.817986000 |
| H | -2.806337000 | 2.877799000  | -2.065865000 |
| H | -3.942274000 | 2.024482000  | -1.013638000 |
| C | -2.667034000 | 2.187922000  | 1.313514000  |
| H | -3.222639000 | 1.250616000  | 1.219705000  |
| H | -1.876306000 | 2.026264000  | 2.052096000  |
| H | -3.346520000 | 2.958276000  | 1.690975000  |
| C | -0.775214000 | 4.371759000  | -1.303932000 |
| H | -1.614162000 | 5.008291000  | -1.600939000 |
| H | 0.119979000  | 4.993873000  | -1.232516000 |
| H | -0.609405000 | 3.630433000  | -2.090896000 |
| C | -1.287285000 | 4.732593000  | 1.114873000  |

|   |              |             |             |
|---|--------------|-------------|-------------|
| H | -1.315667000 | 4.281143000 | 2.108489000 |
| H | -0.496948000 | 5.487491000 | 1.108659000 |
| H | -2.240440000 | 5.243141000 | 0.939074000 |

**L = NHC**

**1**

**M06-L/BSI SCF energy in gas: -1434.30308 a.u.**

**M06/BSII SCF energy in benzene: -1433.779393 a.u.**

**M06/BSII//M06-L/BSI free energy in benzene: -1433.287460 a.u.**

**M06/BSII//M06-L/BSI entalphy in benzene: -1433.181866 a.u.**

|   |              |              |              |
|---|--------------|--------------|--------------|
| H | -4.922992000 | -5.155982000 | 0.386025000  |
| C | -4.344380000 | -4.238144000 | 0.324551000  |
| H | -5.983429000 | -3.063958000 | -0.435296000 |
| C | -4.938418000 | -3.062267000 | -0.134629000 |
| C | -4.204176000 | -1.886206000 | -0.208792000 |
| H | -4.666287000 | -0.972359000 | -0.576266000 |
| C | -2.845453000 | -1.853499000 | 0.166614000  |
| C | -2.261235000 | -3.053150000 | 0.615068000  |
| C | -3.001389000 | -4.225139000 | 0.700203000  |
| H | -2.530393000 | -5.137422000 | 1.060155000  |
| H | -1.210289000 | -3.028495000 | 0.900790000  |
| C | -2.064817000 | -0.648130000 | 0.075536000  |
| C | -2.064709000 | 0.648446000  | -0.075169000 |
| C | -2.845137000 | 1.853931000  | -0.166485000 |
| H | -4.666267000 | 0.973142000  | 0.576089000  |
| C | -4.203937000 | 1.886882000  | 0.208627000  |



|    |              |              |              |
|----|--------------|--------------|--------------|
| C  | -4.937983000 | 3.063047000  | 0.134175000  |
| H  | -5.983059000 | 3.064930000  | 0.434612000  |
| C  | -4.343666000 | 4.238784000  | -0.325003000 |
| H  | -4.922129000 | 5.156700000  | -0.386710000 |
| C  | -3.000594000 | 4.225538000  | -0.700355000 |
| H  | -2.529380000 | 5.137711000  | -1.060301000 |
| C  | -2.260638000 | 3.053446000  | -0.614931000 |
| Pd | -0.130418000 | 0.000012000  | 0.000315000  |
| C  | 1.297639000  | -1.548966000 | 0.140854000  |
| N  | 2.419328000  | -1.629942000 | 0.921756000  |
| H  | 3.018011000  | -1.119139000 | 2.865079000  |
| N  | 1.397822000  | -2.670108000 | -0.638062000 |
| C  | 0.421572000  | -3.019716000 | -1.644629000 |
| H  | 0.004047000  | -4.014091000 | -1.457350000 |
| H  | -0.380171000 | -2.277803000 | -1.592276000 |
| H  | 0.867125000  | -3.005250000 | -2.645422000 |
| H  | 2.098410000  | -5.439297000 | -0.926970000 |
| C  | 2.868833000  | -4.672491000 | -1.069952000 |
| C  | 2.542042000  | -3.414248000 | -0.362875000 |
| H  | 3.812062000  | -5.084655000 | -0.703746000 |
| H  | 2.971859000  | -4.525477000 | -2.151684000 |
| C  | 3.194967000  | -2.750829000 | 0.632443000  |
| C  | 4.451952000  | -3.065821000 | 1.347398000  |
| H  | 4.289546000  | -3.231850000 | 2.419375000  |
| H  | 4.903887000  | -3.974900000 | 0.943455000  |

|   |              |              |              |
|---|--------------|--------------|--------------|
| H | 5.193851000  | -2.262962000 | 1.259869000  |
| H | 1.892979000  | -0.006492000 | -2.051063000 |
| C | 2.763049000  | 0.639663000  | -1.914864000 |
| H | 3.613519000  | 0.025398000  | -1.591598000 |
| H | 3.017506000  | 1.118379000  | -2.865146000 |
| N | 2.419325000  | 1.629460000  | -0.921752000 |
| C | 1.297889000  | 1.548706000  | -0.140449000 |
| C | 2.763489000  | -0.640302000 | 1.914873000  |
| H | 3.614046000  | -0.026224000 | 1.591482000  |
| H | 0.868249000  | 3.004940000  | 2.645791000  |
| C | 0.422532000  | 3.019787000  | 1.645076000  |
| H | -0.379533000 | 2.278219000  | 1.592734000  |
| H | 0.005411000  | 4.014378000  | 1.458059000  |
| N | 1.398441000  | 2.669954000  | 0.638259000  |
| C | 2.542648000  | 3.413938000  | 0.362586000  |
| H | 2.972957000  | 4.525396000  | 2.151122000  |
| C | 2.869772000  | 4.672248000  | 1.069384000  |
| H | 3.813004000  | 5.084200000  | 0.702947000  |
| H | 2.099451000  | 5.439159000  | 0.926406000  |
| C | 3.195168000  | 2.750309000  | -0.632858000 |
| C | 4.451942000  | 3.065112000  | -1.348270000 |
| H | 5.193744000  | 2.262132000  | -1.261026000 |
| H | 4.289179000  | 3.231198000  | -2.420185000 |
| H | 4.904167000  | 3.974109000  | -0.944465000 |
| H | -1.209632000 | 3.028601000  | -0.900420000 |

H 1.893603000 0.006058000 2.051280000

### 1\_alkyne

**M06-L/BSI SCF energy in gas:** -1050.855299 a.u.

**M06/BSII SCF energy in benzene:** -1050.477534 a.u.

**M06/BSII//M06-L/BSI free energy in benzene:** -1050.158931 a.u.

**M06/BSII//M06-L/BSI entalphy in benzene:** -1050.07639 a.u.

Pd 1.523782000 -0.712015000 -0.515703000

B 1.582567000 1.156795000 0.357593000

B -2.789262000 0.054854000 0.412230000

O 1.606558000 1.434490000 1.726531000

O 2.002432000 2.264537000 -0.371783000

O -3.547354000 -0.591759000 -0.538990000

O -3.549341000 0.823437000 1.264012000

C -0.306733000 0.390867000 -0.224396000

C -1.250878000 -0.195008000 0.580296000

C 2.243824000 2.717603000 1.916857000

C 2.053835000 3.399323000 0.525003000

C -4.902944000 -0.083697000 -0.443828000

C -4.942163000 0.522342000 1.000330000

C -0.941992000 -1.281673000 1.537259000

C 0.261473000 -1.369691000 2.264545000

C -1.883368000 -2.311605000 1.729129000

H 0.988852000 -0.569769000 2.184731000

H -2.815736000 -2.286009000 1.165830000

C 0.507654000 -2.439608000 3.116916000

|   |              |              |              |
|---|--------------|--------------|--------------|
| C | -1.634162000 | -3.384827000 | 2.580569000  |
| H | 1.440638000  | -2.469899000 | 3.676023000  |
| H | -2.381414000 | -4.166399000 | 2.693810000  |
| C | -0.432540000 | -3.457782000 | 3.278790000  |
| H | -0.233762000 | -4.290797000 | 3.947898000  |
| C | -0.733216000 | 1.354912000  | -1.260520000 |
| C | -1.728569000 | 2.324113000  | -1.049245000 |
| C | -0.103745000 | 1.341002000  | -2.517765000 |
| H | -2.191509000 | 2.408055000  | -0.067644000 |
| H | 0.705014000  | 0.624273000  | -2.672175000 |
| C | -2.097021000 | 3.212622000  | -2.055920000 |
| C | -0.479976000 | 2.215111000  | -3.528001000 |
| H | -2.863265000 | 3.959440000  | -1.857345000 |
| H | 0.020341000  | 2.172241000  | -4.492529000 |
| C | -1.482298000 | 3.159169000  | -3.303597000 |
| H | -1.767535000 | 3.855499000  | -4.087751000 |
| C | -5.860493000 | -1.237071000 | -0.671164000 |
| H | -5.751386000 | -1.614969000 | -1.691155000 |
| H | -5.669830000 | -2.063314000 | 0.017160000  |
| H | -6.898777000 | -0.912567000 | -0.541527000 |
| C | -5.061029000 | 0.958962000  | -1.538674000 |
| H | -4.366643000 | 1.790570000  | -1.396717000 |
| H | -4.831655000 | 0.503544000  | -2.505563000 |
| H | -6.081021000 | 1.354124000  | -1.575076000 |
| C | -5.376932000 | -0.477098000 | 2.062920000  |

|   |              |              |              |
|---|--------------|--------------|--------------|
| H | -6.436273000 | -0.735466000 | 1.969057000  |
| H | -4.789776000 | -1.398746000 | 2.008582000  |
| H | -5.214352000 | -0.041461000 | 3.051733000  |
| C | -5.743682000 | 1.803323000  | 1.123874000  |
| H | -5.704163000 | 2.170682000  | 2.152654000  |
| H | -5.352909000 | 2.586362000  | 0.470310000  |
| H | -6.794797000 | 1.631976000  | 0.867097000  |
| C | 3.196274000  | 4.298039000  | 0.095260000  |
| H | 3.324672000  | 5.131184000  | 0.795365000  |
| H | 4.140280000  | 3.750826000  | 0.035445000  |
| H | 2.987660000  | 4.718111000  | -0.892316000 |
| C | 0.727316000  | 4.133909000  | 0.406750000  |
| H | 0.538240000  | 4.372148000  | -0.643820000 |
| H | -0.100073000 | 3.508820000  | 0.753738000  |
| H | 0.726260000  | 5.063961000  | 0.984897000  |
| C | 3.704477000  | 2.453949000  | 2.258526000  |
| H | 4.246837000  | 3.379738000  | 2.475647000  |
| H | 3.757551000  | 1.813919000  | 3.144091000  |
| H | 4.219329000  | 1.940900000  | 1.439969000  |
| C | 1.563553000  | 3.430398000  | 3.070056000  |
| H | 0.484881000  | 3.497002000  | 2.919714000  |
| H | 1.739528000  | 2.887426000  | 4.002828000  |
| H | 1.961098000  | 4.444315000  | 3.191583000  |
| P | 0.576445000  | -2.712556000 | -1.524199000 |
| C | -1.198720000 | -2.639681000 | -1.966643000 |

|   |              |              |              |
|---|--------------|--------------|--------------|
| H | -1.382413000 | -1.803456000 | -2.646862000 |
| H | -1.540461000 | -3.569657000 | -2.434482000 |
| H | 0.171208000  | -5.080283000 | -0.967466000 |
| H | -1.794322000 | -2.452500000 | -1.069808000 |
| C | 0.614407000  | -4.211898000 | -0.466779000 |
| H | 1.645172000  | -4.450532000 | -0.189438000 |
| H | 0.060548000  | -4.011116000 | 0.455624000  |
| H | 2.353353000  | -3.598452000 | -2.941233000 |
| C | 1.298061000  | -3.353725000 | -3.088818000 |
| H | 1.238968000  | -2.583655000 | -3.862877000 |
| H | 0.776491000  | -4.249344000 | -3.444512000 |
| P | 3.788665000  | -1.055034000 | -0.345613000 |
| C | 4.862031000  | 0.303443000  | -0.951352000 |
| H | 4.468425000  | 1.262139000  | -0.604358000 |
| H | 5.903171000  | 0.185424000  | -0.631370000 |
| H | 5.708165000  | -2.520884000 | -0.863561000 |
| H | 4.829204000  | 0.324437000  | -2.043821000 |
| C | 4.640098000  | -2.498256000 | -1.107442000 |
| H | 4.182663000  | -3.428273000 | -0.758551000 |
| H | 4.533631000  | -2.458621000 | -2.194915000 |
| H | 3.874326000  | -2.154362000 | 1.809024000  |
| C | 4.315434000  | -1.239685000 | 1.401957000  |
| H | 3.927596000  | -0.400856000 | 1.986580000  |
| H | 5.404613000  | -1.289764000 | 1.510358000  |

**II**

**M06-L/BSI SCF energy in gas: -894,868570 a.u.**

**M06/BSII SCF energy in benzene: -894,868570 a.u.**

**M06/BSII//M06-L/BSI free energy in benzene: -894,265389 a.u.**

**M06/BSII//M06-L/BSI entalphy in benzene: -894,187894 a.u.**

|    |              |              |              |
|----|--------------|--------------|--------------|
| Pd | -0.000002000 | 0.000026000  | -0.000138000 |
| C  | 2.038096000  | -0.000033000 | -0.000138000 |
| N  | 2.898258000  | 0.755188000  | -0.755241000 |
| H  | 2.790339000  | 2.729489000  | -1.470306000 |
| N  | 2.898063000  | -0.755268000 | 0.755194000  |
| C  | 2.440531000  | -1.722768000 | 1.722734000  |
| H  | 2.790882000  | -1.470531000 | 2.729424000  |
| H  | 1.345932000  | -1.698868000 | 1.699503000  |
| H  | 2.790131000  | -2.729619000 | 1.470095000  |
| H  | 5.328834000  | -1.009252000 | 2.254795000  |
| C  | 5.348769000  | -1.169924000 | 1.169956000  |
| C  | 4.233451000  | -0.481960000 | 0.482074000  |
| H  | 6.310654000  | -0.803677000 | 0.802974000  |
| H  | 5.328158000  | -2.254845000 | 1.009956000  |
| C  | 4.233583000  | 0.481871000  | -0.481790000 |
| C  | 5.349062000  | 1.169862000  | -1.169378000 |
| H  | 5.328956000  | 2.254686000  | -1.008633000 |
| H  | 6.310864000  | 0.802956000  | -0.802837000 |
| H  | 5.328847000  | 1.009936000  | -2.254319000 |
| H  | -1.346188000 | -1.699625000 | -1.698887000 |
| C  | -2.440788000 | -1.723730000 | -1.721770000 |

|   |              |              |              |
|---|--------------|--------------|--------------|
| H | -2.791593000 | -1.472272000 | -2.728493000 |
| H | -2.790057000 | -2.730494000 | -1.468309000 |
| N | -2.898187000 | -0.755670000 | -0.754721000 |
| C | -2.038095000 | 0.000118000  | -0.000091000 |
| C | 2.440938000  | 1.722577000  | -1.722998000 |
| H | 2.791669000  | 1.470326000  | -2.729548000 |
| H | -2.790288000 | 2.730606000  | 1.468346000  |
| C | -2.440677000 | 1.723927000  | 1.721652000  |
| H | -1.346077000 | 1.700052000  | 1.698485000  |
| H | -2.791065000 | 1.472337000  | 2.728490000  |
| N | -2.898133000 | 0.755788000  | 0.754716000  |
| C | -4.233497000 | 0.482251000  | 0.481700000  |
| H | -5.328311000 | 2.255450000  | 1.008321000  |
| C | -5.348880000 | 1.170636000  | 1.169053000  |
| H | -6.310729000 | 0.804098000  | 0.802266000  |
| H | -5.329001000 | 1.010699000  | 2.254002000  |
| C | -4.233534000 | -0.482241000 | -0.481503000 |
| C | -5.348948000 | -1.170740000 | -1.168691000 |
| H | -5.328683000 | -1.011521000 | -2.253735000 |
| H | -5.328795000 | -2.255458000 | -1.007238000 |
| H | -6.310788000 | -0.803643000 | -0.802440000 |
| H | 1.346337000  | 1.698628000  | -1.700054000 |

## I2

**M06-L/BSI SCF energy in gas:** -1717.352147 a.u.



**M06/BSII SCF energy in benzene: -1716.848478 a.u.**

**M06/BSII//M06-L/BSI free energy in benzene: -1716.191515 a.u.**

**M06/BSII//M06-L/BSI entalphy in benzene: -1716.070986 a.u.**

|    |              |              |              |
|----|--------------|--------------|--------------|
| Pd | -0.009808000 | -1.062230000 | -0.003069000 |
| C  | -2.012497000 | -1.543494000 | -0.032519000 |
| N  | -2.782804000 | -1.903403000 | -1.105650000 |
| H  | -2.486539000 | -2.821393000 | -2.971063000 |
| N  | -2.890261000 | -1.634802000 | 1.013166000  |
| C  | -2.513937000 | -1.354471000 | 2.378748000  |
| H  | -2.618726000 | -2.248317000 | 3.003188000  |
| H  | -1.471202000 | -1.028075000 | 2.363957000  |
| H  | -3.124109000 | -0.548124000 | 2.796507000  |
| H  | -5.062582000 | -2.990583000 | 2.312695000  |
| C  | -5.279546000 | -2.227778000 | 1.555364000  |
| C  | -4.156553000 | -2.044634000 | 0.609089000  |
| H  | -6.180951000 | -2.542138000 | 1.023814000  |
| H  | -5.521448000 | -1.304414000 | 2.095690000  |
| C  | -4.089405000 | -2.210683000 | -0.743196000 |
| C  | -5.126523000 | -2.587850000 | -1.728290000 |
| H  | -4.868525000 | -3.500332000 | -2.278857000 |
| H  | -6.082320000 | -2.765964000 | -1.229464000 |
| H  | -5.287790000 | -1.799814000 | -2.474812000 |
| H  | 1.171015000  | -1.734125000 | 2.408985000  |
| C  | 2.261969000  | -1.798845000 | 2.470356000  |
| H  | 2.637056000  | -0.895533000 | 2.965150000  |

|   |              |              |              |
|---|--------------|--------------|--------------|
| H | 2.553458000  | -2.678201000 | 3.051974000  |
| N | 2.755220000  | -1.891503000 | 1.117695000  |
| C | 1.991595000  | -1.547130000 | 0.035358000  |
| C | -2.288913000 | -1.873567000 | -2.460500000 |
| H | -2.746372000 | -1.056636000 | -3.029052000 |
| H | 3.117648000  | -0.598456000 | -2.798754000 |
| C | 2.502596000  | -1.398464000 | -2.375774000 |
| H | 1.461228000  | -1.067124000 | -2.368317000 |
| H | 2.606316000  | -2.299051000 | -2.990510000 |
| N | 2.871430000  | -1.664979000 | -1.005509000 |
| C | 4.133102000  | -2.077340000 | -0.589433000 |
| H | 5.505028000  | -1.379259000 | -2.089157000 |
| C | 5.256659000  | -2.289034000 | -1.529057000 |
| H | 6.155158000  | -2.597085000 | -0.989020000 |
| H | 5.036342000  | -3.067071000 | -2.269756000 |
| C | 4.060653000  | -2.215435000 | 0.765948000  |
| C | 5.091869000  | -2.582432000 | 1.761121000  |
| H | 5.252371000  | -1.784619000 | 2.497198000  |
| H | 4.828519000  | -3.486690000 | 2.322785000  |
| H | 6.049156000  | -2.770907000 | 1.268968000  |
| H | -1.209175000 | -1.702844000 | -2.401593000 |
| O | -1.610297000 | 1.405026000  | 1.162220000  |
| C | -2.570065000 | 2.427683000  | 0.854668000  |
| C | -1.926805000 | 3.757133000  | 1.239815000  |
| H | -1.643036000 | 3.722420000  | 2.294780000  |

|   |              |             |              |
|---|--------------|-------------|--------------|
| H | -2.600173000 | 4.607256000 | 1.087243000  |
| H | -1.013847000 | 3.927546000 | 0.660404000  |
| C | -3.823119000 | 2.202059000 | 1.680461000  |
| H | -4.242499000 | 1.206246000 | 1.514347000  |
| H | -3.589150000 | 2.298176000 | 2.745116000  |
| H | -4.593386000 | 2.943023000 | 1.437972000  |
| H | -2.128182000 | 4.255540000 | -1.309026000 |
| C | -2.980096000 | 3.582890000 | -1.431229000 |
| H | -3.881805000 | 4.095983000 | -1.077310000 |
| H | -3.102306000 | 3.388858000 | -2.500686000 |
| C | -2.767872000 | 2.274280000 | -0.689680000 |
| C | -3.874518000 | 1.293321000 | -1.048358000 |
| H | -3.773468000 | 0.360782000 | -0.490856000 |
| H | -3.819305000 | 1.062604000 | -2.116825000 |
| H | -4.866063000 | 1.711685000 | -0.841790000 |
| O | -1.509326000 | 1.720462000 | -1.116025000 |
| B | -0.844285000 | 1.199175000 | 0.001165000  |
| B | 0.865540000  | 1.185437000 | -0.011745000 |
| O | 1.631597000  | 1.385050000 | -1.174315000 |
| O | 1.540362000  | 1.695096000 | 1.105559000  |
| C | 2.598124000  | 2.401319000 | -0.867616000 |
| C | 2.800565000  | 2.242798000 | 0.675826000  |
| C | 3.904259000  | 1.255554000 | 1.026191000  |
| H | 3.799963000  | 0.327032000 | 0.462849000  |
| H | 3.852129000  | 1.017965000 | 2.093562000  |

|   |             |             |              |
|---|-------------|-------------|--------------|
| H | 4.261558000 | 1.172455000 | -1.538600000 |
| H | 4.896710000 | 1.671994000 | 0.820049000  |
| C | 3.846715000 | 2.171135000 | -1.699070000 |
| H | 3.608822000 | 2.272133000 | -2.762382000 |
| H | 4.622133000 | 2.907004000 | -1.457429000 |
| H | 3.925604000 | 4.057505000 | 1.064341000  |
| H | 3.148813000 | 3.349778000 | 2.488819000  |
| C | 3.022771000 | 3.547994000 | 1.420536000  |
| H | 2.173838000 | 4.225521000 | 1.304613000  |
| H | 2.640689000 | 4.581327000 | -1.093829000 |
| C | 1.961503000 | 3.735839000 | -1.246423000 |
| H | 1.673459000 | 3.706064000 | -2.300358000 |
| H | 1.051905000 | 3.910023000 | -0.662945000 |

### **TSOA1**

Imaginary Frequency: -53.68

**M06-L/BSI SCF energy in gas:** -1717.351074 a.u.

**M06/BSII SCF energy in benzene:** -1716.845759 a.u.

**M06/BSII//M06-L/BSI free energy in benzene:** -1716.185297 a.u.

**M06/BSII//M06-L/BSI entalphy in benzene:** -1716.069042 a.u.

|    |              |              |              |
|----|--------------|--------------|--------------|
| Pd | -0.002372000 | -0.892519000 | -0.060103000 |
| C  | -1.937247000 | -1.712902000 | -0.060412000 |
| N  | -2.736989000 | -2.009204000 | -1.133171000 |
| H  | -2.548301000 | -2.875092000 | -3.037196000 |
| N  | -2.816046000 | -1.770389000 | 0.989494000  |
| C  | -2.425377000 | -1.496607000 | 2.351507000  |

|   |              |              |              |
|---|--------------|--------------|--------------|
| H | -2.515432000 | -2.391668000 | 2.977456000  |
| H | -1.386752000 | -1.156973000 | 2.329139000  |
| H | -3.034388000 | -0.694410000 | 2.779457000  |
| H | -5.067658000 | -2.989674000 | 2.290613000  |
| C | -5.237237000 | -2.210877000 | 1.537365000  |
| C | -4.109085000 | -2.093118000 | 0.587142000  |
| H | -6.159589000 | -2.462327000 | 1.008065000  |
| H | -5.416282000 | -1.276045000 | 2.083279000  |
| C | -4.060548000 | -2.240484000 | -0.766813000 |
| C | -5.123101000 | -2.543442000 | -1.750432000 |
| H | -4.925274000 | -3.465202000 | -2.310907000 |
| H | -6.085842000 | -2.667480000 | -1.248511000 |
| H | -5.239667000 | -1.740531000 | -2.489616000 |
| H | 0.989757000  | -2.178400000 | 2.302477000  |
| C | 2.068635000  | -2.037187000 | 2.414709000  |
| H | 2.238153000  | -1.072522000 | 2.907485000  |
| H | 2.485385000  | -2.837489000 | 3.032803000  |
| N | 2.646446000  | -2.059636000 | 1.093315000  |
| C | 1.918150000  | -1.737938000 | -0.021563000 |
| C | -2.253504000 | -1.973582000 | -2.490776000 |
| H | -2.630655000 | -1.093854000 | -3.024233000 |
| H | 3.149610000  | -0.632949000 | -2.753284000 |
| C | 2.559234000  | -1.481154000 | -2.393486000 |
| H | 1.503691000  | -1.204150000 | -2.441619000 |
| H | 2.747913000  | -2.349865000 | -3.034000000 |

|   |              |              |              |
|---|--------------|--------------|--------------|
| N | 2.861888000  | -1.777077000 | -1.014307000 |
| C | 4.126248000  | -2.111653000 | -0.535855000 |
| H | 5.519728000  | -1.255339000 | -1.926199000 |
| C | 5.312999000  | -2.204182000 | -1.414736000 |
| H | 6.201600000  | -2.463198000 | -0.834213000 |
| H | 5.196813000  | -2.965869000 | -2.195180000 |
| C | 3.990268000  | -2.285716000 | 0.809482000  |
| C | 4.987945000  | -2.615954000 | 1.850866000  |
| H | 5.045755000  | -1.840172000 | 2.624758000  |
| H | 4.764177000  | -3.560294000 | 2.362309000  |
| H | 5.983076000  | -2.713440000 | 1.410157000  |
| H | -1.162989000 | -1.908793000 | -2.444010000 |
| O | -1.631302000 | 1.342866000  | 1.180165000  |
| C | -2.506372000 | 2.451222000  | 0.902231000  |
| C | -1.756931000 | 3.718300000  | 1.296111000  |
| H | -1.446679000 | 3.640790000  | 2.341426000  |
| H | -2.372182000 | 4.616855000  | 1.178977000  |
| H | -0.851341000 | 3.834829000  | 0.692303000  |
| C | -3.764654000 | 2.300153000  | 1.736309000  |
| H | -4.236115000 | 1.327352000  | 1.572835000  |
| H | -3.520016000 | 2.382202000  | 2.799670000  |
| H | -4.495164000 | 3.081765000  | 1.498268000  |
| H | -2.026313000 | 4.293182000  | -1.232070000 |
| C | -2.900417000 | 3.650643000  | -1.360568000 |
| H | -3.782372000 | 4.187686000  | -0.992778000 |

|   |              |             |              |
|---|--------------|-------------|--------------|
| H | -3.035248000 | 3.477274000 | -2.431915000 |
| C | -2.725655000 | 2.329184000 | -0.637363000 |
| C | -3.854157000 | 1.368963000 | -0.993351000 |
| H | -3.735251000 | 0.417035000 | -0.466927000 |
| H | -3.827616000 | 1.165254000 | -2.068386000 |
| H | -4.838417000 | 1.783430000 | -0.748466000 |
| O | -1.494308000 | 1.721595000 | -1.079316000 |
| B | -0.941242000 | 1.028492000 | 0.002097000  |
| B | 0.961830000  | 1.015666000 | -0.045971000 |
| O | 1.668979000  | 1.375099000 | -1.200076000 |
| O | 1.507338000  | 1.655291000 | 1.072424000  |
| C | 2.544541000  | 2.467676000 | -0.864903000 |
| C | 2.741534000  | 2.284887000 | 0.672036000  |
| C | 3.869531000  | 1.317500000 | 1.007825000  |
| H | 3.763262000  | 0.385199000 | 0.445343000  |
| H | 3.829278000  | 1.074380000 | 2.074109000  |
| H | 4.284718000  | 1.367241000 | -1.547592000 |
| H | 4.855160000  | 1.744994000 | 0.792840000  |
| C | 3.814714000  | 2.344574000 | -1.685398000 |
| H | 3.585247000  | 2.462422000 | -2.748705000 |
| H | 4.541109000  | 3.118026000 | -1.410603000 |
| H | 3.785742000  | 4.131556000 | 1.119409000  |
| H | 3.019537000  | 3.359558000 | 2.515865000  |
| C | 2.900115000  | 3.576994000 | 1.450662000  |
| H | 2.025905000  | 4.222214000 | 1.336527000  |

|   |             |             |              |
|---|-------------|-------------|--------------|
| H | 2.421620000 | 4.643227000 | -1.058220000 |
| C | 1.805778000 | 3.752160000 | -1.220547000 |
| H | 1.512301000 | 3.717219000 | -2.272802000 |
| H | 0.891023000 | 3.847713000 | -0.627158000 |

### I3

**M06-L/BSI SCF energy in gas:** -1717.351659 a.u.

**M06/BSII SCF energy in benzene:** -1716.847826 a.u.

**M06/BSII//M06-L/BSI free energy in benzene:** -1716.187282 a.u.

**M06/BSII//M06-L/BSI entalphy in benzene:** -1716.069433 a.u.

|    |              |              |              |
|----|--------------|--------------|--------------|
| Pd | -0.000440000 | -0.852576000 | -0.046242000 |
| C  | -1.887872000 | -1.833964000 | -0.093352000 |
| N  | -2.667326000 | -2.037104000 | -1.200025000 |
| H  | -2.559415000 | -2.644435000 | -3.205532000 |
| N  | -2.789861000 | -1.938403000 | 0.930448000  |
| C  | -2.430094000 | -1.719570000 | 2.310582000  |
| H  | -2.500159000 | -2.643470000 | 2.895699000  |
| H  | -1.404191000 | -1.342889000 | 2.321485000  |
| H  | -3.071362000 | -0.956212000 | 2.760877000  |
| H  | -5.112611000 | -3.182069000 | 2.080547000  |
| C  | -5.237464000 | -2.335961000 | 1.393750000  |
| C  | -4.084843000 | -2.179962000 | 0.479110000  |
| H  | -6.155523000 | -2.507740000 | 0.826681000  |
| H  | -5.397809000 | -1.445690000 | 2.014182000  |
| C  | -4.008705000 | -2.235487000 | -0.880484000 |
| C  | -5.055993000 | -2.436695000 | -1.906305000 |



|   |              |              |              |
|---|--------------|--------------|--------------|
| H | -4.879828000 | -3.331603000 | -2.515583000 |
| H | -6.036032000 | -2.550242000 | -1.436585000 |
| H | -5.119734000 | -1.587066000 | -2.597750000 |
| H | 0.958937000  | -2.044090000 | 2.386496000  |
| C | 2.042794000  | -1.944956000 | 2.483975000  |
| H | 2.259501000  | -0.959991000 | 2.913554000  |
| H | 2.426182000  | -2.723152000 | 3.150485000  |
| N | 2.612888000  | -2.072044000 | 1.164833000  |
| C | 1.882231000  | -1.843318000 | 0.029827000  |
| C | -2.155284000 | -1.876806000 | -2.539099000 |
| H | -2.398441000 | -0.885307000 | -2.938000000 |
| H | 3.112096000  | -0.823281000 | -2.716268000 |
| C | 2.534264000  | -1.675133000 | -2.344608000 |
| H | 1.475572000  | -1.413838000 | -2.409082000 |
| H | 2.743172000  | -2.554974000 | -2.962946000 |
| N | 2.828550000  | -1.928510000 | -0.955158000 |
| C | 4.102766000  | -2.180630000 | -0.452023000 |
| H | 5.475772000  | -1.400398000 | -1.907975000 |
| C | 5.293431000  | -2.309122000 | -1.320920000 |
| H | 6.187864000  | -2.496241000 | -0.722005000 |
| H | 5.199314000  | -3.134518000 | -2.037201000 |
| C | 3.966133000  | -2.266360000 | 0.901335000  |
| C | 4.965637000  | -2.492640000 | 1.968650000  |
| H | 4.995187000  | -1.660815000 | 2.683582000  |
| H | 4.763424000  | -3.402656000 | 2.546753000  |

|   |              |              |              |
|---|--------------|--------------|--------------|
| H | 5.966508000  | -2.593206000 | 1.542197000  |
| H | -1.067513000 | -1.965828000 | -2.489993000 |
| O | -1.749591000 | 1.214668000  | 1.237189000  |
| C | -2.480822000 | 2.439222000  | 1.026507000  |
| C | -1.585515000 | 3.581457000  | 1.489056000  |
| H | -1.299281000 | 3.413275000  | 2.530669000  |
| H | -2.083680000 | 4.554187000  | 1.415507000  |
| H | -0.663925000 | 3.609508000  | 0.899257000  |
| C | -3.753752000 | 2.391154000  | 1.849070000  |
| H | -4.336367000 | 1.492872000  | 1.628466000  |
| H | -3.509176000 | 2.380606000  | 2.915317000  |
| H | -4.384058000 | 3.267097000  | 1.657552000  |
| H | -1.825283000 | 4.356186000  | -0.988655000 |
| C | -2.747537000 | 3.797240000  | -1.162461000 |
| H | -3.586784000 | 4.384864000  | -0.772681000 |
| H | -2.880151000 | 3.697627000  | -2.243522000 |
| C | -2.696623000 | 2.428123000  | -0.515225000 |
| C | -3.903705000 | 1.592330000  | -0.929285000 |
| H | -3.875371000 | 0.604493000  | -0.454837000 |
| H | -3.884600000 | 1.447669000  | -2.013715000 |
| H | -4.850104000 | 2.077760000  | -0.666296000 |
| O | -1.521094000 | 1.731673000  | -0.984512000 |
| B | -1.084214000 | 0.896752000  | 0.048624000  |
| B | 1.085415000  | 0.896914000  | -0.091364000 |
| O | 1.758127000  | 1.265651000  | -1.260656000 |

|   |             |             |              |
|---|-------------|-------------|--------------|
| O | 1.518872000 | 1.683793000 | 0.980981000  |
| C | 2.495891000 | 2.474533000 | -0.988821000 |
| C | 2.703861000 | 2.388476000 | 0.551298000  |
| C | 3.898844000 | 1.520060000 | 0.931902000  |
| H | 3.865243000 | 0.557794000 | 0.408200000  |
| H | 3.867140000 | 1.318335000 | 2.007045000  |
| H | 4.349952000 | 1.547386000 | -1.622346000 |
| H | 4.852864000 | 2.008005000 | 0.703343000  |
| C | 3.773157000 | 2.457752000 | -1.805843000 |
| H | 3.534783000 | 2.495951000 | -2.872841000 |
| H | 4.406462000 | 3.321103000 | -1.571689000 |
| H | 3.611918000 | 4.322378000 | 0.904233000  |
| H | 2.890612000 | 3.574978000 | 2.338152000  |
| C | 2.765133000 | 3.725294000 | 1.262081000  |
| H | 1.848690000 | 4.299451000 | 1.108314000  |
| H | 2.112613000 | 4.608395000 | -1.275308000 |
| C | 1.610113000 | 3.643263000 | -1.400757000 |
| H | 1.331431000 | 3.528906000 | -2.451726000 |
| H | 0.683885000 | 3.647400000 | -0.817677000 |

#### I4

**M06-L/BSI SCF energy in gas:** -511.397141 a.u.

**M06/BSII SCF energy in benzene:** -511.2447256 a.u.

**M06/BSII//M06-L/BSI free energy in benzene: -511.0991431 a.u.**

**M06/BSII//M06-L/BSI entalphy in benzene: -511.0484411 a.u.**

|    |              |              |              |
|----|--------------|--------------|--------------|
| Pd | -2.095901000 | 0.000000000  | -0.000016000 |
| H  | -0.829681000 | -2.419425000 | -0.000003000 |
| C  | 0.264381000  | -2.443708000 | -0.000073000 |
| H  | 0.618843000  | -2.973271000 | 0.890285000  |
| H  | 0.618645000  | -2.972957000 | -0.890704000 |
| N  | 0.711911000  | -1.072354000 | 0.000113000  |
| C  | -0.142997000 | 0.000017000  | 0.000066000  |
| H  | 0.617982000  | 2.972751000  | 0.891197000  |
| C  | 0.264404000  | 2.443731000  | 0.000160000  |
| H  | -0.829660000 | 2.419481000  | -0.000816000 |
| H  | 0.619580000  | 2.973496000  | -0.889791000 |
| N  | 0.711928000  | 1.072365000  | -0.000046000 |
| C  | 2.046483000  | 0.681048000  | -0.000095000 |
| H  | 3.141614000  | 2.306980000  | 0.879969000  |
| C  | 3.161883000  | 1.653300000  | -0.000149000 |
| H  | 4.123007000  | 1.133634000  | 0.000547000  |
| H  | 3.142416000  | 2.306064000  | -0.880969000 |
| C  | 2.046471000  | -0.681063000 | -0.000035000 |
| C  | 3.161857000  | -1.653333000 | 0.000124000  |
| H  | 3.141858000  | -2.306497000 | 0.880634000  |
| H  | 3.142104000  | -2.306615000 | -0.880304000 |
| H  | 4.122988000  | -1.133682000 | 0.000211000  |

## I5

**M06-L/BSI SCF energy in gas:** -1333.913396 a.u.

**M06/BSII SCF energy in benzene:** -1333.544822 a.u.

**M06/BSII//M06-L/BSI free energy in benzene:** -1333.05814 a.u.

**M06/BSII//M06-L/BSI entalphy in benzene:** -1332.962189 a.u.

|    |              |              |              |
|----|--------------|--------------|--------------|
| Pd | -0.406866000 | -0.886570000 | -0.786564000 |
| B  | -0.471680000 | 1.425411000  | 0.009352000  |
| B  | -1.893133000 | 0.538937000  | 0.164689000  |
| O  | 0.429354000  | 1.619132000  | 1.060032000  |
| O  | -0.159808000 | 2.243537000  | -1.076612000 |
| O  | -2.602687000 | 0.258846000  | 1.324123000  |
| O  | -2.559646000 | 0.012622000  | -0.974692000 |
| C  | 1.304239000  | 2.705270000  | 0.699397000  |
| C  | 1.166311000  | 2.768351000  | -0.856538000 |
| C  | -3.907304000 | -0.228613000 | 0.941521000  |
| C  | -3.676520000 | -0.803901000 | -0.491170000 |
| C  | -3.215059000 | -2.250574000 | -0.488774000 |
| H  | -2.883164000 | -2.525449000 | -1.495222000 |
| H  | -2.364423000 | -2.390894000 | 0.189502000  |
| H  | -4.021730000 | -2.930559000 | -0.194688000 |
| C  | -4.358781000 | -1.255211000 | 1.961875000  |
| H  | -5.315859000 | -1.702101000 | 1.670834000  |
| H  | -3.624050000 | -2.054091000 | 2.080257000  |
| H  | -4.494288000 | -0.775757000 | 2.934945000  |

|   |              |              |              |
|---|--------------|--------------|--------------|
| C | -4.843322000 | 0.973976000  | 0.950724000  |
| H | -4.811886000 | 1.442247000  | 1.937497000  |
| H | -4.531938000 | 1.720630000  | 0.214371000  |
| H | -5.878208000 | 0.688231000  | 0.737745000  |
| C | -4.836699000 | -0.617100000 | -1.447581000 |
| H | -5.083344000 | 0.437377000  | -1.584304000 |
| H | -4.584538000 | -1.034855000 | -2.425878000 |
| H | -5.729045000 | -1.136223000 | -1.080336000 |
| C | 0.768322000  | 3.952976000  | 1.391158000  |
| H | 0.707888000  | 3.768755000  | 2.466965000  |
| H | 1.411693000  | 4.823676000  | 1.226922000  |
| H | -0.237560000 | 4.193563000  | 1.035316000  |
| C | 2.701890000  | 2.386303000  | 1.201072000  |
| H | 3.052540000  | 1.415573000  | 0.838545000  |
| H | 3.419303000  | 3.152770000  | 0.886256000  |
| H | 2.705657000  | 2.358493000  | 2.295514000  |
| C | 2.141760000  | 1.845803000  | -1.574669000 |
| H | 1.869685000  | 1.791714000  | -2.632874000 |
| H | 3.176007000  | 2.199572000  | -1.497529000 |
| H | 2.075121000  | 0.836344000  | -1.160661000 |
| C | 1.237827000  | 4.165259000  | -1.443503000 |
| H | 2.208812000  | 4.628294000  | -1.233713000 |
| H | 1.116509000  | 4.117759000  | -2.529129000 |
| H | 0.453429000  | 4.812753000  | -1.046797000 |
| H | 1.554399000  | -1.551244000 | -2.656472000 |

|   |              |              |              |
|---|--------------|--------------|--------------|
| C | 1.401452000  | -1.446537000 | -0.142967000 |
| N | 2.541904000  | -1.692121000 | -0.861987000 |
| C | 2.571078000  | -1.747923000 | -2.303529000 |
| H | 2.897225000  | -2.731694000 | -2.656210000 |
| H | 3.242667000  | -0.984696000 | -2.710892000 |
| C | 3.661550000  | -1.818798000 | -0.046540000 |
| C | 5.017193000  | -2.066973000 | -0.585226000 |
| H | 5.353246000  | -1.257906000 | -1.245204000 |
| H | 5.068858000  | -2.995049000 | -1.166763000 |
| H | 5.743471000  | -2.148811000 | 0.226631000  |
| C | 3.217681000  | -1.661597000 | 1.232957000  |
| C | 3.942691000  | -1.678744000 | 2.522486000  |
| H | 5.009480000  | -1.850067000 | 2.361269000  |
| H | 3.579839000  | -2.466951000 | 3.192657000  |
| H | 3.838266000  | -0.729778000 | 3.062266000  |
| N | 1.846889000  | -1.446411000 | 1.149543000  |
| C | 0.995109000  | -1.199822000 | 2.292123000  |
| H | 1.075667000  | -2.019980000 | 3.012613000  |
| H | -0.033101000 | -1.122223000 | 1.930346000  |
| H | 1.257522000  | -0.255170000 | 2.775349000  |

## **TSOA2**

Imaginary Frequency: -29.48

**M06-L/BSI SCF energy in gas: -1333.903224 a.u.**

**M06/BSII SCF energy in benzene: -1333.542456 a.u.**

**M06/BSII//M06-L/BSI free energy in benzene: -1333.057094 a.u.**

**M06/BSII//M06-L/BSI entalphy in benzene: -1332.961012 a.u.**

|    |              |              |              |
|----|--------------|--------------|--------------|
| Pd | -0.415471000 | 0.317894000  | -0.453184000 |
| B  | 1.197421000  | -1.030423000 | -0.159549000 |
| B  | 1.682629000  | 0.691941000  | 0.029709000  |
| O  | 1.095424000  | -1.864596000 | 0.954966000  |
| O  | 1.560239000  | -1.747415000 | -1.298351000 |
| O  | 2.119001000  | 1.124585000  | 1.270133000  |
| O  | 2.135798000  | 1.514196000  | -0.995498000 |
| C  | 1.554681000  | -3.175715000 | 0.552368000  |
| C  | 1.345024000  | -3.144222000 | -0.991996000 |
| C  | 3.038953000  | 2.220344000  | 1.043521000  |
| C  | 2.612186000  | 2.730397000  | -0.364592000 |
| C  | 1.428956000  | 3.688808000  | -0.310940000 |
| H  | 1.047646000  | 3.841214000  | -1.324593000 |
| H  | 0.617843000  | 3.264926000  | 0.292129000  |
| H  | 1.710998000  | 4.662185000  | 0.104108000  |
| C  | 2.873672000  | 3.231644000  | 2.159504000  |
| H  | 3.495482000  | 4.115476000  | 1.977681000  |
| H  | 1.834650000  | 3.552047000  | 2.256825000  |
| H  | 3.182540000  | 2.793113000  | 3.112099000  |
| C  | 4.441688000  | 1.627859000  | 1.056983000  |



|   |              |              |              |
|---|--------------|--------------|--------------|
| H | 4.598527000  | 1.099267000  | 2.000660000  |
| H | 4.572412000  | 0.910465000  | 0.241265000  |
| H | 5.210127000  | 2.401951000  | 0.963487000  |
| C | 3.734858000  | 3.308207000  | -1.200886000 |
| H | 4.524175000  | 2.574764000  | -1.376380000 |
| H | 3.350938000  | 3.628644000  | -2.173083000 |
| H | 4.176705000  | 4.181986000  | -0.708559000 |
| C | 3.022982000  | -3.270225000 | 0.944775000  |
| H | 3.122499000  | -3.067457000 | 2.014051000  |
| H | 3.436785000  | -4.263236000 | 0.741121000  |
| H | 3.618935000  | -2.528749000 | 0.403922000  |
| C | 0.737384000  | -4.223030000 | 1.281731000  |
| H | -0.333498000 | -4.082734000 | 1.115531000  |
| H | 1.007817000  | -5.231428000 | 0.948685000  |
| H | 0.924000000  | -4.162611000 | 2.357518000  |
| C | -0.086584000 | -3.468921000 | -1.399945000 |
| H | -0.218515000 | -3.231398000 | -2.458590000 |
| H | -0.328502000 | -4.526387000 | -1.249118000 |
| H | -0.795548000 | -2.853161000 | -0.834757000 |
| C | 2.330681000  | -3.978617000 | -1.784470000 |
| H | 2.253042000  | -5.037165000 | -1.511669000 |
| H | 2.121387000  | -3.891054000 | -2.853943000 |
| H | 3.359014000  | -3.653239000 | -1.615118000 |
| H | -1.969242000 | 2.398676000  | -1.586962000 |
| C | -2.440756000 | 0.405691000  | -0.123609000 |

|   |              |              |              |
|---|--------------|--------------|--------------|
| N | -3.362775000 | 1.332945000  | -0.516217000 |
| C | -3.028052000 | 2.481076000  | -1.325691000 |
| H | -3.191189000 | 3.413064000  | -0.774890000 |
| H | -3.626666000 | 2.502534000  | -2.241413000 |
| C | -4.635935000 | 1.050583000  | -0.033743000 |
| C | -5.807500000 | 1.909137000  | -0.316951000 |
| H | -6.013276000 | 1.988351000  | -1.391019000 |
| H | -5.671571000 | 2.930543000  | 0.057817000  |
| H | -6.704004000 | 1.504004000  | 0.158002000  |
| C | -4.519426000 | -0.100774000 | 0.688481000  |
| C | -5.528698000 | -0.886297000 | 1.432920000  |
| H | -6.518834000 | -0.437150000 | 1.327178000  |
| H | -5.304807000 | -0.937777000 | 2.504968000  |
| H | -5.595416000 | -1.918966000 | 1.071492000  |
| N | -3.180861000 | -0.468577000 | 0.621021000  |
| C | -2.618631000 | -1.632509000 | 1.269499000  |
| H | -2.855483000 | -1.629449000 | 2.337471000  |
| H | -1.531848000 | -1.591843000 | 1.140202000  |
| H | -3.006819000 | -2.555472000 | 0.824172000  |

## I6

**M06-L/BSI SCF energy in gas:** -1333.905412 a.u.

**M06/BSII SCF energy in benzene:** -1333.545573 a.u.

**M06/BSII//M06-L/BSI free energy in benzene:** -1333.06066 a.u.

**M06/BSII//M06-L/BSI entalphy in benzene: -1332.963003 a.u.**

|    |              |              |              |
|----|--------------|--------------|--------------|
| Pd | 0.661499000  | -0.218754000 | -0.071969000 |
| B  | -1.030291000 | 0.952663000  | -0.139178000 |
| B  | -1.299659000 | -0.938735000 | 0.061478000  |
| O  | -1.119511000 | 1.862763000  | 0.911116000  |
| O  | -1.747447000 | 1.390626000  | -1.247995000 |
| O  | -2.075826000 | -1.173954000 | 1.189360000  |
| O  | -1.633060000 | -1.806748000 | -0.972458000 |
| C  | -2.093849000 | 2.864194000  | 0.540217000  |
| C  | -2.085578000 | 2.778565000  | -1.015994000 |
| C  | -3.086014000 | -2.147236000 | 0.822395000  |
| C  | -2.425408000 | -2.866354000 | -0.389113000 |
| C  | -1.460978000 | -3.967122000 | 0.036172000  |
| H  | -0.877340000 | -4.286334000 | -0.831607000 |
| H  | -0.762881000 | -3.602085000 | 0.796352000  |
| H  | -1.988003000 | -4.839933000 | 0.435624000  |
| C  | -3.365007000 | -3.034064000 | 2.018283000  |
| H  | -4.061473000 | -3.837749000 | 1.753354000  |
| H  | -2.448548000 | -3.483636000 | 2.405234000  |
| H  | -3.817861000 | -2.448153000 | 2.822652000  |
| C  | -4.330406000 | -1.364081000 | 0.427387000  |
| H  | -4.627260000 | -0.717044000 | 1.257354000  |
| H  | -4.129918000 | -0.734161000 | -0.446119000 |
| H  | -5.169998000 | -2.026088000 | 0.192201000  |

|   |              |              |              |
|---|--------------|--------------|--------------|
| C | -3.395314000 | -3.381128000 | -1.433564000 |
| H | -3.990795000 | -2.572121000 | -1.861370000 |
| H | -2.846288000 | -3.860067000 | -2.248717000 |
| H | -4.075489000 | -4.125075000 | -1.003559000 |
| C | -3.422623000 | 2.435463000  | 1.146652000  |
| H | -3.300008000 | 2.304237000  | 2.224743000  |
| H | -4.208405000 | 3.178285000  | 0.973156000  |
| H | -3.749720000 | 1.479022000  | 0.729278000  |
| C | -1.656400000 | 4.200501000  | 1.106117000  |
| H | -0.636996000 | 4.449776000  | 0.802301000  |
| H | -2.323149000 | 5.005119000  | 0.775821000  |
| H | -1.683909000 | 4.169545000  | 2.198787000  |
| C | -0.979313000 | 3.615176000  | -1.645461000 |
| H | -0.885710000 | 3.351613000  | -2.701918000 |
| H | -1.189252000 | 4.687431000  | -1.572818000 |
| H | -0.017375000 | 3.414346000  | -1.162792000 |
| C | -3.417474000 | 3.069096000  | -1.678008000 |
| H | -3.753278000 | 4.087435000  | -1.451902000 |
| H | -3.324214000 | 2.978572000  | -2.763537000 |
| H | -4.188228000 | 2.369589000  | -1.347349000 |
| H | 2.162551000  | -2.468448000 | -0.932760000 |
| C | 2.751697000  | -0.204971000 | -0.001507000 |
| N | 3.647716000  | -1.174247000 | -0.335567000 |
| C | 3.252272000  | -2.470539000 | -0.838152000 |
| H | 3.554337000  | -3.267322000 | -0.151404000 |

|   |             |              |              |
|---|-------------|--------------|--------------|
| H | 3.698857000 | -2.660563000 | -1.818669000 |
| C | 4.962388000 | -0.769120000 | -0.133322000 |
| C | 6.121984000 | -1.643722000 | -0.416200000 |
| H | 6.162552000 | -1.949062000 | -1.468284000 |
| H | 6.102864000 | -2.562057000 | 0.182196000  |
| H | 7.056922000 | -1.126018000 | -0.190026000 |
| C | 4.895046000 | 0.508248000  | 0.342301000  |
| C | 5.960937000 | 1.457229000  | 0.732790000  |
| H | 6.945959000 | 1.009985000  | 0.582129000  |
| H | 5.890637000 | 1.747733000  | 1.787536000  |
| H | 5.926219000 | 2.381258000  | 0.144253000  |
| N | 3.543079000 | 0.822439000  | 0.416607000  |
| C | 3.014446000 | 2.087980000  | 0.877966000  |
| H | 3.387684000 | 2.319960000  | 1.879745000  |
| H | 1.923921000 | 1.997364000  | 0.909227000  |
| H | 3.293129000 | 2.900167000  | 0.198738000  |

## I7

**M06-L/BSI SCF energy in gas:** -2256.749816 a.u.

**M06/BSII SCF energy in benzene:** -2256.005574 a.u.

**M06/BSII//M06-L/BSI free energy in benzene::** -2255.166538 a.u.

**M06/BSII//M06-L/BSI entalphy in benzene:** -2255.02227 a.u.

|    |              |             |              |
|----|--------------|-------------|--------------|
| Pd | -0.032765000 | 0.288287000 | -0.169863000 |
| H  | 0.152377000  | 2.792831000 | 1.334068000  |
| C  | 0.883864000  | 3.557714000 | 1.066147000  |
| H  | 0.416684000  | 4.548698000 | 1.084276000  |

|   |             |              |              |
|---|-------------|--------------|--------------|
| H | 1.694703000 | 3.539473000  | 1.803980000  |
| N | 1.389257000 | 3.248100000  | -0.251473000 |
| C | 1.013224000 | 2.152784000  | -0.986043000 |
| H | 1.965913000 | 1.749664000  | -4.114031000 |
| C | 1.860077000 | 1.267471000  | -3.138433000 |
| H | 0.935765000 | 0.692432000  | -3.115058000 |
| H | 2.700375000 | 0.581117000  | -2.984556000 |
| N | 1.810740000 | 2.260756000  | -2.089556000 |
| C | 2.663259000 | 3.360323000  | -2.040577000 |
| H | 3.162830000 | 3.853519000  | -4.074832000 |
| C | 3.642433000 | 3.668254000  | -3.106157000 |
| H | 4.217751000 | 4.561334000  | -2.850732000 |
| H | 4.356041000 | 2.849054000  | -3.256653000 |
| C | 2.389651000 | 3.994769000  | -0.868189000 |
| C | 2.978146000 | 5.207981000  | -0.259268000 |
| H | 2.232992000 | 5.993986000  | -0.087677000 |
| H | 3.445508000 | 4.996260000  | 0.710835000  |
| H | 3.750470000 | 5.625801000  | -0.909508000 |
| O | 2.905484000 | -0.298440000 | 0.270793000  |
| C | 3.968542000 | 0.072545000  | 1.172436000  |
| C | 4.355093000 | 1.507402000  | 0.834380000  |
| H | 4.607079000 | 1.568544000  | -0.229086000 |
| H | 5.216016000 | 1.853877000  | 1.416456000  |
| H | 3.513611000 | 2.184257000  | 1.012464000  |
| C | 5.141599000 | -0.862120000 | 0.952828000  |

|   |              |              |              |
|---|--------------|--------------|--------------|
| H | 4.833020000  | -1.907423000 | 1.019368000  |
| H | 5.566932000  | -0.700728000 | -0.042054000 |
| H | 5.934044000  | -0.684081000 | 1.688932000  |
| H | 3.648660000  | 1.945663000  | 3.313374000  |
| C | 3.781896000  | 0.904609000  | 3.617247000  |
| H | 4.845934000  | 0.738137000  | 3.820788000  |
| H | 3.235715000  | 0.755063000  | 4.553103000  |
| C | 3.277009000  | -0.055798000 | 2.559986000  |
| C | 3.284916000  | -1.486610000 | 3.076373000  |
| H | 2.908918000  | -2.166275000 | 2.305675000  |
| H | 2.623003000  | -1.561931000 | 3.944305000  |
| H | 4.287098000  | -1.807576000 | 3.379551000  |
| O | 1.901198000  | 0.272402000  | 2.245573000  |
| B | 1.686131000  | -0.026709000 | 0.895495000  |
| C | -1.518448000 | -0.384021000 | -1.906842000 |
| C | -0.393267000 | -0.957570000 | -1.949869000 |
| C | 0.405870000  | -2.012658000 | -2.532128000 |
| C | -0.171014000 | -2.889504000 | -3.470430000 |
| C | 1.745558000  | -2.204376000 | -2.165367000 |
| H | -1.213042000 | -2.746761000 | -3.749487000 |
| H | 2.176664000  | -1.541823000 | -1.419420000 |
| C | 0.571717000  | -3.929490000 | -4.014421000 |
| C | 2.485288000  | -3.241521000 | -2.721203000 |
| H | 0.109601000  | -4.604251000 | -4.730795000 |
| H | 3.521490000  | -3.379413000 | -2.420453000 |

|   |              |              |              |
|---|--------------|--------------|--------------|
| C | 1.904656000  | -4.109515000 | -3.643779000 |
| H | 2.483604000  | -4.924424000 | -4.070898000 |
| C | -2.862309000 | 0.042818000  | -2.032549000 |
| C | -3.783983000 | -0.188873000 | -0.986086000 |
| C | -3.312825000 | 0.739304000  | -3.174919000 |
| H | -3.430003000 | -0.704036000 | -0.094201000 |
| H | -2.614551000 | 0.918883000  | -3.988458000 |
| C | -5.088299000 | 0.270921000  | -1.081623000 |
| C | -4.619499000 | 1.203985000  | -3.253076000 |
| H | -5.779114000 | 0.088614000  | -0.260632000 |
| H | -4.941847000 | 1.746233000  | -4.138802000 |
| C | -5.515711000 | 0.981255000  | -2.207775000 |
| H | -6.536659000 | 1.347947000  | -2.271416000 |
| H | -4.629281000 | 4.153353000  | 1.227697000  |
| C | -4.861264000 | 3.088108000  | 1.347653000  |
| H | -5.351807000 | 2.761093000  | 0.421536000  |
| C | -3.656255000 | 2.277067000  | 1.631245000  |
| C | -3.313148000 | 1.508503000  | 2.703534000  |
| C | -4.022461000 | 1.247771000  | 3.976111000  |
| H | -3.462781000 | 1.608821000  | 4.847670000  |
| H | -4.992831000 | 1.750361000  | 3.981972000  |
| H | -4.202847000 | 0.178307000  | 4.136413000  |
| H | -5.587275000 | 3.000117000  | 2.159850000  |
| N | -2.610134000 | 2.153864000  | 0.724670000  |
| N | -2.073594000 | 0.952818000  | 2.399250000  |



|   |              |              |              |
|---|--------------|--------------|--------------|
| H | -1.278602000 | 0.625034000  | 4.302544000  |
| C | -1.333748000 | 0.127102000  | 3.328653000  |
| H | -1.810075000 | -0.850368000 | 3.446161000  |
| H | -0.322655000 | -0.012377000 | 2.941876000  |
| C | -1.621502000 | 1.318156000  | 1.163778000  |
| H | -3.458390000 | 2.648604000  | -1.130912000 |
| C | -2.567566000 | 2.865841000  | -0.532246000 |
| H | -1.676889000 | 2.534468000  | -1.072521000 |
| H | -2.508606000 | 3.946916000  | -0.358014000 |
| B | -0.131069000 | -1.555951000 | 0.718016000  |
| O | -1.400932000 | -1.945302000 | 1.157648000  |
| O | 0.734787000  | -2.643124000 | 0.736170000  |
| C | 0.045467000  | -3.779258000 | 1.313957000  |
| C | -1.454125000 | -3.390407000 | 1.136422000  |
| H | -1.367402000 | -3.460439000 | -1.032427000 |
| C | -2.016490000 | -3.798190000 | -0.219132000 |
| H | -2.136590000 | -4.883682000 | -0.298933000 |
| H | -2.995806000 | -3.331627000 | -0.360275000 |
| H | -2.058975000 | -3.481343000 | 3.223691000  |
| C | -2.374812000 | -3.856820000 | 2.247565000  |
| H | -2.410784000 | -4.950928000 | 2.296681000  |
| H | -3.390952000 | -3.497286000 | 2.058778000  |
| H | 0.188177000  | -2.948758000 | 3.313466000  |
| C | 0.461801000  | -3.863123000 | 2.775645000  |
| H | 1.546943000  | -3.977457000 | 2.841479000  |

|   |              |              |              |
|---|--------------|--------------|--------------|
| H | -0.000748000 | -4.716309000 | 3.282672000  |
| H | 1.539474000  | -5.212441000 | 0.731116000  |
| C | 0.475335000  | -5.023676000 | 0.561871000  |
| H | 0.324186000  | -4.911462000 | -0.514136000 |
| H | -0.081412000 | -5.903138000 | 0.905321000  |

### TSIA1

Imaginary Frequency: -169.66

**M06-L/BSI SCF energy in gas: -2256.737028 a.u.**

**M06/BSII SCF energy in benzene: -2255.994992 a.u.**

**M06/BSII//M06-L/BSI free energy in benzene: -2255.155282 a.u.**

**M06/BSII//M06-L/BSI entalphy in benzene: -2255.012389 a.u.**

|    |             |              |              |
|----|-------------|--------------|--------------|
| Pd | 0.044414000 | -0.347734000 | 0.018153000  |
| H  | 2.251221000 | -2.149439000 | -0.934361000 |
| C  | 3.094449000 | -2.430487000 | -0.302533000 |
| H  | 3.154975000 | -3.521455000 | -0.217028000 |
| H  | 4.014838000 | -2.062220000 | -0.766667000 |
| N  | 2.905125000 | -1.815548000 | 0.991338000  |
| C  | 1.773739000 | -1.137595000 | 1.359184000  |
| H  | 1.070639000 | -0.279850000 | 4.395787000  |
| C  | 1.232840000 | 0.153759000  | 3.404196000  |
| H  | 0.279488000 | 0.248780000  | 2.886040000  |
| H  | 1.668627000 | 1.152114000  | 3.517960000  |
| N  | 2.095375000 | -0.691916000 | 2.609262000  |
| C  | 3.372767000 | -1.070672000 | 3.007315000  |
| H  | 3.362525000 | -1.046575000 | 5.157280000  |

|   |             |              |              |
|---|-------------|--------------|--------------|
| C | 3.953922000 | -0.679487000 | 4.310317000  |
| H | 4.964266000 | -1.081268000 | 4.417621000  |
| H | 4.019955000 | 0.409982000  | 4.417883000  |
| C | 3.890522000 | -1.791897000 | 1.974382000  |
| C | 5.217470000 | -2.422428000 | 1.795374000  |
| H | 5.145415000 | -3.494966000 | 1.579918000  |
| H | 5.778867000 | -1.968889000 | 0.967993000  |
| H | 5.820941000 | -2.308086000 | 2.698871000  |
| O | 2.068633000 | 1.946274000  | 0.166336000  |
| C | 3.389910000 | 2.284160000  | -0.314214000 |
| C | 4.385809000 | 1.565146000  | 0.587530000  |
| H | 4.187041000 | 1.840056000  | 1.628029000  |
| H | 5.422855000 | 1.828692000  | 0.353056000  |
| H | 4.271333000 | 0.479200000  | 0.505556000  |
| C | 3.572385000 | 3.785719000  | -0.223656000 |
| H | 2.763548000 | 4.317128000  | -0.728586000 |
| H | 3.574028000 | 4.099130000  | 0.824124000  |
| H | 4.525299000 | 4.095794000  | -0.667739000 |
| H | 5.129974000 | 0.453737000  | -1.641442000 |
| C | 4.704213000 | 1.230612000  | -2.281398000 |
| H | 5.421934000 | 2.056520000  | -2.343606000 |
| H | 4.586824000 | 0.813295000  | -3.285593000 |
| C | 3.365941000 | 1.710509000  | -1.758636000 |
| C | 2.701947000 | 2.658187000  | -2.748513000 |
| H | 1.742762000 | 3.007855000  | -2.352876000 |

|   |              |              |              |
|---|--------------|--------------|--------------|
| H | 2.508200000  | 2.125990000  | -3.684964000 |
| H | 3.328462000  | 3.528328000  | -2.970948000 |
| O | 2.483311000  | 0.570587000  | -1.615586000 |
| B | 1.620183000  | 0.840328000  | -0.549015000 |
| C | -1.782498000 | -0.677921000 | 1.253753000  |
| C | -1.490319000 | 0.593263000  | 1.176989000  |
| C | -1.738307000 | 1.791375000  | 1.967857000  |
| C | -2.942112000 | 1.925696000  | 2.681759000  |
| C | -0.791109000 | 2.824718000  | 2.038494000  |
| H | -3.678101000 | 1.125545000  | 2.624215000  |
| H | 0.132927000  | 2.717641000  | 1.472772000  |
| C | -3.190776000 | 3.062113000  | 3.441391000  |
| C | -1.041925000 | 3.953293000  | 2.810962000  |
| H | -4.128851000 | 3.153019000  | 3.983995000  |
| H | -0.298097000 | 4.745388000  | 2.861388000  |
| C | -2.241929000 | 4.082038000  | 3.509820000  |
| H | -2.438418000 | 4.971545000  | 4.102787000  |
| C | -2.639597000 | -1.656202000 | 1.836840000  |
| C | -4.025991000 | -1.662690000 | 1.567740000  |
| C | -2.125159000 | -2.678388000 | 2.664311000  |
| H | -4.432579000 | -0.886436000 | 0.923101000  |
| H | -1.055701000 | -2.691655000 | 2.869608000  |
| C | -4.849503000 | -2.646548000 | 2.098236000  |
| C | -2.961784000 | -3.638610000 | 3.214936000  |
| H | -5.912746000 | -2.634147000 | 1.869995000  |

|   |              |              |              |
|---|--------------|--------------|--------------|
| H | -2.544531000 | -4.403489000 | 3.866098000  |
| C | -4.327930000 | -3.637732000 | 2.929193000  |
| H | -4.977467000 | -4.400610000 | 3.349024000  |
| H | -0.067667000 | -5.914172000 | -2.295869000 |
| C | -0.893497000 | -5.284956000 | -2.649784000 |
| H | -1.771484000 | -5.543119000 | -2.046601000 |
| C | -0.573580000 | -3.842129000 | -2.573636000 |
| C | -0.471849000 | -2.893162000 | -3.545867000 |
| C | -0.648454000 | -2.979751000 | -5.012473000 |
| H | 0.272192000  | -2.741762000 | -5.559043000 |
| H | -0.948943000 | -3.989157000 | -5.303150000 |
| H | -1.419941000 | -2.289542000 | -5.373079000 |
| H | -1.106074000 | -5.576132000 | -3.681163000 |
| N | -0.306839000 | -3.191045000 | -1.373857000 |
| N | -0.145618000 | -1.705925000 | -2.896858000 |
| H | 0.695336000  | -0.541963000 | -4.421378000 |
| C | 0.000287000  | -0.442476000 | -3.581650000 |
| H | -0.970707000 | -0.092788000 | -3.949417000 |
| H | 0.398536000  | 0.280793000  | -2.870118000 |
| C | -0.050232000 | -1.860040000 | -1.545582000 |
| H | -1.388195000 | -4.068591000 | 0.203701000  |
| C | -0.357734000 | -3.830068000 | -0.078783000 |
| H | 0.046827000  | -3.126119000 | 0.652923000  |
| H | 0.235597000  | -4.750370000 | -0.081850000 |
| B | -1.197524000 | 1.070164000  | -0.806941000 |

|   |              |             |              |
|---|--------------|-------------|--------------|
| O | -2.293036000 | 0.676653000 | -1.582671000 |
| O | -0.966390000 | 2.437098000 | -0.946967000 |
| C | -1.922036000 | 2.979785000 | -1.878925000 |
| C | -3.023599000 | 1.867603000 | -1.939214000 |
| H | -3.696817000 | 2.192794000 | 0.102274000  |
| C | -4.118720000 | 2.059067000 | -0.898097000 |
| H | -4.749837000 | 2.924460000 | -1.124923000 |
| H | -4.752040000 | 1.167707000 | -0.880328000 |
| H | -2.891348000 | 1.402302000 | -4.059464000 |
| C | -3.642192000 | 1.664671000 | -3.309718000 |
| H | -4.158667000 | 2.570958000 | -3.645584000 |
| H | -4.376353000 | 0.855094000 | -3.269832000 |
| H | -0.815014000 | 2.228640000 | -3.590831000 |
| C | -1.201373000 | 3.177506000 | -3.206315000 |
| H | -0.352377000 | 3.851068000 | -3.059878000 |
| H | -1.856691000 | 3.617503000 | -3.965260000 |
| H | -1.566165000 | 5.023964000 | -1.314087000 |
| C | -2.400563000 | 4.317193000 | -1.343012000 |
| H | -2.792240000 | 4.225746000 | -0.327457000 |
| H | -3.181742000 | 4.742432000 | -1.983664000 |

## I8

**M06-L/BSI SCF energy in gas:** -2256.813570 a.u.

**M06/BSII SCF energy in benzene:** -2256.075216 a.u.

**M06/BSII//M06-L/BSI free energy in benzene:** -2255.231849 a.u.

**M06/BSII//M06-L/BSI entalphy in benzene: -2255.089796 a.u.**

|    |              |              |              |
|----|--------------|--------------|--------------|
| Pd | 0.607848000  | 0.262981000  | -0.603407000 |
| H  | 2.545449000  | -1.039745000 | -2.212988000 |
| C  | 3.106597000  | -1.868201000 | -1.776812000 |
| H  | 2.925742000  | -2.777311000 | -2.357292000 |
| H  | 4.171449000  | -1.616318000 | -1.794010000 |
| N  | 2.645206000  | -2.045479000 | -0.417903000 |
| C  | 1.734040000  | -1.239755000 | 0.187160000  |
| H  | -0.195831000 | -1.879096000 | 2.503532000  |
| C  | 0.685356000  | -1.233792000 | 2.416841000  |
| H  | 0.347247000  | -0.253630000 | 2.074834000  |
| H  | 1.170827000  | -1.140347000 | 3.393070000  |
| N  | 1.615962000  | -1.752000000 | 1.439020000  |
| C  | 2.414347000  | -2.877274000 | 1.610126000  |
| H  | 1.437111000  | -4.078138000 | 3.091718000  |
| C  | 2.425749000  | -3.660101000 | 2.864446000  |
| H  | 3.125805000  | -4.494903000 | 2.786848000  |
| H  | 2.727068000  | -3.056324000 | 3.728984000  |
| C  | 3.072279000  | -3.062426000 | 0.430825000  |
| C  | 4.022823000  | -4.107070000 | -0.006235000 |
| H  | 3.609053000  | -4.707942000 | -0.825362000 |
| H  | 4.971254000  | -3.685073000 | -0.359463000 |
| H  | 4.251311000  | -4.786772000 | 0.817699000  |
| O  | 2.713073000  | 1.660650000  | 1.078384000  |
| C  | 4.150042000  | 1.650162000  | 1.251459000  |

|   |              |              |              |
|---|--------------|--------------|--------------|
| C | 4.506915000  | 0.322907000  | 1.911826000  |
| H | 3.927666000  | 0.213268000  | 2.833674000  |
| H | 5.570979000  | 0.263955000  | 2.164505000  |
| H | 4.257380000  | -0.519451000 | 1.257865000  |
| C | 4.547752000  | 2.810239000  | 2.141497000  |
| H | 4.152207000  | 3.757061000  | 1.767323000  |
| H | 4.155997000  | 2.659778000  | 3.151447000  |
| H | 5.637942000  | 2.895432000  | 2.214436000  |
| H | 5.903368000  | -0.035714000 | -0.235289000 |
| C | 5.965669000  | 1.026575000  | -0.484084000 |
| H | 6.782410000  | 1.468214000  | 0.098391000  |
| H | 6.226471000  | 1.109466000  | -1.543094000 |
| C | 4.656519000  | 1.742549000  | -0.215332000 |
| C | 4.721769000  | 3.175592000  | -0.727004000 |
| H | 3.786098000  | 3.704963000  | -0.521816000 |
| H | 4.871597000  | 3.165942000  | -1.809614000 |
| H | 5.543203000  | 3.737357000  | -0.270110000 |
| O | 3.603108000  | 1.072914000  | -0.946982000 |
| B | 2.431144000  | 1.143006000  | -0.196228000 |
| C | -1.048098000 | -1.233517000 | -0.585176000 |
| C | -2.217328000 | -1.078195000 | 0.097441000  |
| C | -3.312818000 | -2.075585000 | 0.185416000  |
| C | -3.696821000 | -2.863182000 | -0.914108000 |
| C | -4.051886000 | -2.221061000 | 1.373842000  |
| H | -3.154895000 | -2.753615000 | -1.851070000 |



|   |              |              |              |
|---|--------------|--------------|--------------|
| H | -3.775499000 | -1.621018000 | 2.239867000  |
| C | -4.747034000 | -3.767712000 | -0.822231000 |
| C | -5.101019000 | -3.130012000 | 1.467926000  |
| H | -5.021050000 | -4.362303000 | -1.690568000 |
| H | -5.645570000 | -3.229522000 | 2.404539000  |
| C | -5.454792000 | -3.910815000 | 0.370560000  |
| H | -6.276953000 | -4.618284000 | 0.440576000  |
| C | -0.630946000 | -2.538134000 | -1.124846000 |
| C | -0.079476000 | -2.680608000 | -2.412108000 |
| C | -0.604277000 | -3.681476000 | -0.297201000 |
| H | -0.032779000 | -1.807740000 | -3.063360000 |
| H | -1.016346000 | -3.600157000 | 0.707780000  |
| C | 0.433595000  | -3.893412000 | -2.859992000 |
| C | -0.057376000 | -4.883720000 | -0.728078000 |
| H | 0.837601000  | -3.965559000 | -3.868262000 |
| H | -0.038721000 | -5.737200000 | -0.052709000 |
| C | 0.460836000  | -5.004301000 | -2.017757000 |
| H | 0.878468000  | -5.947414000 | -2.360814000 |
| H | -2.966182000 | 2.952351000  | -4.522500000 |
| C | -3.172434000 | 3.255564000  | -3.489331000 |
| H | -4.039182000 | 2.675602000  | -3.151000000 |
| C | -2.009648000 | 3.064177000  | -2.595668000 |
| C | -1.310193000 | 3.956709000  | -1.846054000 |
| C | -1.442110000 | 5.424104000  | -1.709158000 |
| H | -0.539939000 | 5.957712000  | -2.031288000 |

|   |              |              |              |
|---|--------------|--------------|--------------|
| H | -2.272973000 | 5.788740000  | -2.317848000 |
| H | -1.638667000 | 5.727305000  | -0.672820000 |
| H | -3.466737000 | 4.307385000  | -3.510767000 |
| N | -1.451365000 | 1.819853000  | -2.341864000 |
| N | -0.361757000 | 3.216186000  | -1.147096000 |
| H | 1.251109000  | 4.515936000  | -0.825893000 |
| C | 0.584483000  | 3.854059000  | -0.261801000 |
| H | 0.057826000  | 4.454922000  | 0.488942000  |
| H | 1.175371000  | 3.093923000  | 0.247261000  |
| C | -0.439110000 | 1.874078000  | -1.423908000 |
| H | -2.886972000 | 0.290796000  | -2.445725000 |
| C | -1.969090000 | 0.613157000  | -2.947852000 |
| H | -1.227073000 | -0.174160000 | -2.838101000 |
| H | -2.169375000 | 0.791341000  | -4.008030000 |
| B | -2.445121000 | 0.240062000  | 0.883575000  |
| O | -2.971347000 | 1.407041000  | 0.358881000  |
| O | -2.216534000 | 0.345308000  | 2.247720000  |
| C | -2.370498000 | 1.739460000  | 2.600960000  |
| C | -3.322481000 | 2.254225000  | 1.478375000  |
| H | -4.947679000 | 0.941399000  | 2.070413000  |
| C | -4.790273000 | 1.986462000  | 1.784431000  |
| H | -5.163044000 | 2.626485000  | 2.590392000  |
| H | -5.385590000 | 2.179854000  | 0.888414000  |
| H | -2.089572000 | 3.871343000  | 0.751034000  |
| C | -3.114822000 | 3.701321000  | 1.084871000  |

|   |              |             |             |
|---|--------------|-------------|-------------|
| H | -3.327511000 | 4.370301000 | 1.926316000 |
| H | -3.783683000 | 3.967058000 | 0.259806000 |
| H | -0.552059000 | 2.215965000 | 1.530214000 |
| C | -0.980003000 | 2.354372000 | 2.530608000 |
| H | -0.320148000 | 1.846079000 | 3.239966000 |
| H | -0.983478000 | 3.421702000 | 2.776465000 |
| H | -2.215764000 | 1.437092000 | 4.724696000 |
| C | -2.935659000 | 1.833249000 | 4.003511000 |
| H | -3.861188000 | 1.262270000 | 4.102853000 |
| H | -3.140840000 | 2.875344000 | 4.272481000 |

## I9

**M06-L/BSI SCF energy in gas:** -1873.346616 a.u.

**M06/BSII SCF energy in benzene:** -1872.751229 a.u.

**M06/BSII//M06-L/BSI free energy in benzene:** -1872.083904 a.u.

**M06/BSII//M06-L/BSI entalphy in benzene:** -1871.962799 a.u.

|    |              |              |              |
|----|--------------|--------------|--------------|
| Pd | -0.062620000 | 0.487148000  | 0.008207000  |
| H  | -1.280808000 | 0.213289000  | 2.486561000  |
| C  | -2.366013000 | 0.302001000  | 2.578074000  |
| H  | -2.744142000 | -0.514336000 | 3.200074000  |
| H  | -2.611714000 | 1.259102000  | 3.049705000  |
| N  | -2.923182000 | 0.228021000  | 1.245823000  |
| C  | -2.157630000 | 0.255886000  | 0.123221000  |
| H  | -3.072387000 | -0.637994000 | -2.821686000 |
| C  | -2.689055000 | 0.234268000  | -2.284892000 |
| H  | -1.599115000 | 0.227011000  | -2.335501000 |

|   |              |              |              |
|---|--------------|--------------|--------------|
| H | -3.073036000 | 1.148280000  | -2.749668000 |
| N | -3.062235000 | 0.183541000  | -0.887825000 |
| C | -4.368802000 | 0.127951000  | -0.413586000 |
| H | -5.522861000 | -0.865720000 | -1.927780000 |
| C | -5.540134000 | 0.042464000  | -1.313724000 |
| H | -6.467202000 | 0.030786000  | -0.736705000 |
| H | -5.591865000 | 0.892779000  | -2.003230000 |
| C | -4.280420000 | 0.155973000  | 0.948786000  |
| C | -5.322398000 | 0.085220000  | 1.996542000  |
| H | -5.226752000 | -0.819578000 | 2.609479000  |
| H | -5.280032000 | 0.940709000  | 2.679975000  |
| H | -6.318165000 | 0.071529000  | 1.547931000  |
| O | 2.245634000  | -1.122323000 | 1.150992000  |
| C | 3.316100000  | -2.064100000 | 0.888461000  |
| C | 2.842575000  | -3.407197000 | 1.427549000  |
| H | 2.598563000  | -3.302493000 | 2.487882000  |
| H | 3.604403000  | -4.185722000 | 1.318675000  |
| H | 1.931288000  | -3.729807000 | 0.914099000  |
| C | 4.565483000  | -1.609533000 | 1.613960000  |
| H | 4.847355000  | -0.594661000 | 1.326655000  |
| H | 4.396728000  | -1.624693000 | 2.694719000  |
| H | 5.405308000  | -2.278682000 | 1.395256000  |
| H | 3.064619000  | -4.148053000 | -1.044779000 |
| C | 3.779935000  | -3.364348000 | -1.304240000 |
| H | 4.776933000  | -3.691110000 | -0.987832000 |

|   |              |              |              |
|---|--------------|--------------|--------------|
| H | 3.788935000  | -3.264900000 | -2.393123000 |
| C | 3.422309000  | -2.034456000 | -0.668453000 |
| C | 4.337857000  | -0.938262000 | -1.192203000 |
| H | 4.088975000  | 0.031857000  | -0.755088000 |
| H | 4.220029000  | -0.860370000 | -2.276099000 |
| H | 5.389199000  | -1.154837000 | -0.975687000 |
| O | 2.070575000  | -1.686674000 | -1.063260000 |
| B | 1.461077000  | -1.053949000 | 0.010611000  |
| B | -0.377378000 | -1.628880000 | -0.081825000 |
| O | -0.905784000 | -2.126545000 | -1.271116000 |
| O | -0.619756000 | -2.503394000 | 0.974198000  |
| C | -1.260034000 | -3.507054000 | -1.049171000 |
| C | -1.498674000 | -3.549393000 | 0.493807000  |
| C | -2.920071000 | -3.162679000 | 0.878332000  |
| H | -3.233339000 | -2.248290000 | 0.367103000  |
| H | -2.965345000 | -2.984295000 | 1.956943000  |
| H | -3.303656000 | -3.145599000 | -1.686754000 |
| H | -3.634074000 | -3.955904000 | 0.632950000  |
| C | -2.479398000 | -3.834911000 | -1.889190000 |
| H | -2.229448000 | -3.759966000 | -2.951340000 |
| H | -2.828780000 | -4.855479000 | -1.697447000 |
| H | -1.694584000 | -5.687574000 | 0.769973000  |
| H | -1.294825000 | -4.788037000 | 2.241234000  |
| C | -1.107928000 | -4.850879000 | 1.165595000  |
| H | -0.048907000 | -5.074774000 | 1.023113000  |

|   |              |              |              |
|---|--------------|--------------|--------------|
| H | -0.265383000 | -5.420479000 | -1.395290000 |
| C | -0.068796000 | -4.347355000 | -1.487779000 |
| H | 0.165778000  | -4.121722000 | -2.531203000 |
| H | 0.817759000  | -4.094980000 | -0.898631000 |
| C | 0.145493000  | 2.545591000  | -0.087425000 |
| C | 1.331523000  | 2.047923000  | -0.028954000 |
| C | 2.750472000  | 2.295624000  | 0.008127000  |
| C | 3.369451000  | 3.028836000  | -1.020786000 |
| C | 3.544837000  | 1.834286000  | 1.071993000  |
| H | 2.761793000  | 3.382154000  | -1.850519000 |
| H | 3.077484000  | 1.240361000  | 1.852511000  |
| C | 4.734531000  | 3.287005000  | -0.986486000 |
| C | 4.905431000  | 2.119067000  | 1.111069000  |
| H | 5.196026000  | 3.846050000  | -1.796628000 |
| H | 5.501426000  | 1.765510000  | 1.949696000  |
| C | 5.509647000  | 2.838360000  | 0.081234000  |
| H | 6.575520000  | 3.047025000  | 0.110225000  |
| C | -0.660373000 | 3.739321000  | -0.112807000 |
| C | -2.060509000 | 3.699212000  | -0.008598000 |
| C | -0.042696000 | 4.999216000  | -0.243506000 |
| H | -2.544371000 | 2.731579000  | 0.092748000  |
| H | 1.040931000  | 5.044924000  | -0.321712000 |
| C | -2.813488000 | 4.867075000  | -0.029270000 |
| C | -0.798759000 | 6.163068000  | -0.264442000 |
| H | -3.896172000 | 4.811054000  | 0.054799000  |

|   |              |             |              |
|---|--------------|-------------|--------------|
| H | -0.301553000 | 7.124739000 | -0.363949000 |
| C | -2.188526000 | 6.105048000 | -0.157925000 |
| H | -2.777586000 | 7.017817000 | -0.175500000 |

## TSIA2

Imaginary Frequency: -45.23

**M06-L/BSI SCF energy in gas:** -1873.319628 a.u.

**M06/BSII SCF energy in benzene:** -1872.72818 a.u.

**M06/BSII//M06-L/BSI free energy in benzene:** -1872.060578 a.u.

**M06/BSII//M06-L/BSI entalphy in benzene:** -1871.941355 a.u.

|    |              |             |              |
|----|--------------|-------------|--------------|
| Pd | -0.135330000 | 0.479764000 | -0.010617000 |
| H  | -1.183499000 | 0.934500000 | 2.470189000  |
| C  | -2.097203000 | 1.526631000 | 2.559072000  |
| H  | -2.838097000 | 0.954966000 | 3.125110000  |
| H  | -1.877552000 | 2.457901000 | 3.090342000  |
| N  | -2.575757000 | 1.793023000 | 1.221992000  |
| C  | -1.883694000 | 1.453632000 | 0.099444000  |
| H  | -3.065872000 | 0.938125000 | -2.772521000 |
| C  | -2.370721000 | 1.648025000 | -2.315303000 |
| H  | -1.367307000 | 1.219584000 | -2.360913000 |
| H  | -2.394840000 | 2.596740000 | -2.859872000 |
| N  | -2.691631000 | 1.853362000 | -0.920935000 |
| C  | -3.867946000 | 2.429561000 | -0.447840000 |
| H  | -5.340929000 | 2.120725000 | -1.977484000 |
| C  | -4.927201000 | 2.923520000 | -1.354672000 |

|   |              |              |              |
|---|--------------|--------------|--------------|
| H | -5.752248000 | 3.353166000  | -0.782411000 |
| H | -4.560276000 | 3.698985000  | -2.037120000 |
| C | -3.792127000 | 2.395872000  | 0.912955000  |
| C | -4.741984000 | 2.843528000  | 1.954633000  |
| H | -5.096588000 | 2.009982000  | 2.573116000  |
| H | -4.295357000 | 3.578626000  | 2.633879000  |
| H | -5.618927000 | 3.308132000  | 1.498540000  |
| O | 1.641529000  | -1.719916000 | 1.339369000  |
| C | 1.783972000  | -3.142080000 | 1.104991000  |
| C | 0.451772000  | -3.784586000 | 1.464300000  |
| H | 0.212581000  | -3.562800000 | 2.507719000  |
| H | 0.479272000  | -4.872106000 | 1.337393000  |
| H | -0.358853000 | -3.371737000 | 0.858325000  |
| C | 2.884428000  | -3.660646000 | 2.010988000  |
| H | 3.816239000  | -3.108215000 | 1.867627000  |
| H | 2.584320000  | -3.554240000 | 3.057095000  |
| H | 3.077888000  | -4.722505000 | 1.822420000  |
| H | 0.366992000  | -4.332696000 | -1.087677000 |
| C | 1.455005000  | -4.378995000 | -1.153599000 |
| H | 1.789044000  | -5.337683000 | -0.741504000 |
| H | 1.727964000  | -4.354263000 | -2.211900000 |
| C | 2.114325000  | -3.221262000 | -0.427294000 |
| C | 3.606453000  | -3.222083000 | -0.733049000 |
| H | 4.136708000  | -2.419092000 | -0.217550000 |
| H | 3.748686000  | -3.077795000 | -1.807472000 |



|   |              |              |              |
|---|--------------|--------------|--------------|
| H | 4.065823000  | -4.175454000 | -0.451197000 |
| O | 1.558947000  | -1.987508000 | -0.943814000 |
| B | 1.382774000  | -1.119745000 | 0.119679000  |
| B | -1.580075000 | -1.024621000 | -0.153809000 |
| O | -2.255519000 | -1.297545000 | -1.342472000 |
| O | -2.189284000 | -1.689142000 | 0.909239000  |
| C | -3.219697000 | -2.344396000 | -1.089281000 |
| C | -3.454624000 | -2.215631000 | 0.445138000  |
| C | -4.519802000 | -1.180158000 | 0.787265000  |
| H | -4.329804000 | -0.235165000 | 0.266284000  |
| H | -4.499863000 | -0.983707000 | 1.863714000  |
| H | -4.839927000 | -1.080647000 | -1.792086000 |
| H | -5.525452000 | -1.524583000 | 0.522936000  |
| C | -4.442880000 | -2.087587000 | -1.948726000 |
| H | -4.182301000 | -2.184347000 | -3.006797000 |
| H | -5.238809000 | -2.809104000 | -1.732096000 |
| H | -4.648166000 | -3.991186000 | 0.784808000  |
| H | -3.873415000 | -3.334525000 | 2.233925000  |
| C | -3.734618000 | -3.519948000 | 1.165065000  |
| H | -2.909271000 | -4.226870000 | 1.054239000  |
| H | -3.262876000 | -4.506823000 | -1.381123000 |
| C | -2.568783000 | -3.664788000 | -1.472707000 |
| H | -2.218664000 | -3.611746000 | -2.506651000 |
| H | -1.701780000 | -3.863559000 | -0.835186000 |
| C | 1.495286000  | 1.741734000  | 0.032929000  |

|   |              |              |              |
|---|--------------|--------------|--------------|
| C | 2.039224000  | 0.533695000  | -0.013386000 |
| C | 3.476345000  | 0.184264000  | -0.170234000 |
| C | 4.074671000  | 0.178851000  | -1.434626000 |
| C | 4.259751000  | -0.083277000 | 0.959528000  |
| H | 3.458757000  | 0.368347000  | -2.309704000 |
| H | 3.782063000  | -0.107460000 | 1.935561000  |
| C | 5.437724000  | -0.070170000 | -1.562881000 |
| C | 5.622986000  | -0.328566000 | 0.825479000  |
| H | 5.893024000  | -0.070723000 | -2.550091000 |
| H | 6.222728000  | -0.530556000 | 1.709470000  |
| C | 6.216166000  | -0.324749000 | -0.435961000 |
| H | 7.279685000  | -0.521677000 | -0.540143000 |
| C | 1.947653000  | 3.114198000  | 0.011219000  |
| C | 1.006301000  | 4.136256000  | -0.205668000 |
| C | 3.293872000  | 3.484928000  | 0.201303000  |
| H | -0.034774000 | 3.845635000  | -0.341440000 |
| H | 4.039124000  | 2.713647000  | 0.376856000  |
| C | 1.388926000  | 5.470686000  | -0.247648000 |
| C | 3.672222000  | 4.820982000  | 0.166018000  |
| H | 0.643958000  | 6.243320000  | -0.420423000 |
| H | 4.715644000  | 5.087676000  | 0.315738000  |
| C | 2.725111000  | 5.819141000  | -0.060951000 |
| H | 3.027503000  | 6.862572000  | -0.087850000 |

**I9**

**M06-L/BSI SCF energy in gas: -1873.34594 a.u.**

**M06/BSII SCF energy in benzene: -1872.754578 a.u.**

**M06/BSII//M06-L/BSI free energy in benzene: -1872.084285 a.u.**

**M06/BSII//M06-L/BSI entalphy in benzene: -1871.965419 a.u.**

|    |             |              |              |
|----|-------------|--------------|--------------|
| Pd | 0.138085000 | 0.606451000  | -0.909030000 |
| H  | 2.024606000 | -0.761870000 | -2.671774000 |
| C  | 3.049321000 | -0.703184000 | -2.299702000 |
| H  | 3.251807000 | -1.595309000 | -1.696649000 |
| H  | 3.742965000 | -0.664597000 | -3.143344000 |
| N  | 3.159166000 | 0.495371000  | -1.504212000 |
| C  | 2.079903000 | 1.109334000  | -0.933595000 |
| H  | 2.048854000 | 2.839351000  | 1.665744000  |
| C  | 1.871875000 | 3.049000000  | 0.606223000  |
| H  | 0.810789000 | 2.888663000  | 0.396219000  |
| H  | 2.134174000 | 4.087191000  | 0.384469000  |
| N  | 2.634099000 | 2.146030000  | -0.227740000 |
| C  | 4.017329000 | 2.169179000  | -0.353332000 |
| H  | 4.724465000 | 3.164394000  | 1.409013000  |
| C  | 4.855375000 | 3.184962000  | 0.320313000  |
| H  | 5.912741000 | 3.008338000  | 0.112090000  |
| H  | 4.620940000 | 4.203416000  | -0.010641000 |
| C  | 4.351509000 | 1.121107000  | -1.159678000 |
| C  | 5.667730000 | 0.645613000  | -1.638230000 |
| H  | 5.856951000 | -0.394831000 | -1.348408000 |
| H  | 5.757924000 | 0.696558000  | -2.729691000 |
| H  | 6.469340000 | 1.255667000  | -1.216316000 |

|   |              |              |              |
|---|--------------|--------------|--------------|
| O | -1.541556000 | -1.839665000 | -2.247083000 |
| C | -1.024581000 | -3.187011000 | -2.188403000 |
| C | 0.490273000  | -3.088609000 | -2.293205000 |
| H | 0.745489000  | -2.570130000 | -3.222303000 |
| H | 0.964080000  | -4.076177000 | -2.311323000 |
| H | 0.900483000  | -2.519200000 | -1.451491000 |
| C | -1.589187000 | -3.974714000 | -3.353454000 |
| H | -2.679838000 | -3.936515000 | -3.375714000 |
| H | -1.220178000 | -3.561681000 | -4.295992000 |
| H | -1.279680000 | -5.024466000 | -3.300564000 |
| H | 0.440823000  | -4.144634000 | 0.062690000  |
| C | -0.535612000 | -4.613662000 | -0.078084000 |
| H | -0.403880000 | -5.539771000 | -0.648820000 |
| H | -0.929780000 | -4.880050000 | 0.907531000  |
| C | -1.494749000 | -3.671655000 | -0.778138000 |
| C | -2.904112000 | -4.248664000 | -0.791332000 |
| H | -3.598972000 | -3.573074000 | -1.300083000 |
| H | -3.250510000 | -4.376851000 | 0.237868000  |
| H | -2.942673000 | -5.221622000 | -1.291388000 |
| O | -1.550166000 | -2.441066000 | -0.029289000 |
| B | -1.686999000 | -1.405696000 | -0.942933000 |
| B | 1.067396000  | -0.225013000 | 0.682736000  |
| O | 1.016081000  | 0.341512000  | 1.937247000  |
| O | 1.704996000  | -1.452793000 | 0.674031000  |
| C | 1.337560000  | -0.729574000 | 2.871570000  |

|   |              |              |              |
|---|--------------|--------------|--------------|
| C | 2.266903000  | -1.630375000 | 2.007215000  |
| C | 3.699124000  | -1.115038000 | 1.947223000  |
| H | 3.724029000  | -0.044039000 | 1.714909000  |
| H | 4.241783000  | -1.644394000 | 1.157649000  |
| H | 2.851184000  | 0.501557000  | 3.822171000  |
| H | 4.229205000  | -1.275578000 | 2.891621000  |
| C | 1.993412000  | -0.119891000 | 4.091657000  |
| H | 1.274822000  | 0.507516000  | 4.625717000  |
| H | 2.333767000  | -0.899984000 | 4.781515000  |
| H | 2.609323000  | -3.260396000 | 3.379888000  |
| H | 2.872592000  | -3.668886000 | 1.678719000  |
| C | 2.235003000  | -3.100582000 | 2.362634000  |
| H | 1.223330000  | -3.505382000 | 2.300054000  |
| H | 0.165829000  | -2.178330000 | 3.998403000  |
| C | 0.024488000  | -1.411149000 | 3.229970000  |
| H | -0.677731000 | -0.663993000 | 3.609446000  |
| H | -0.434759000 | -1.873859000 | 2.349160000  |
| C | -1.819754000 | 1.130408000  | -1.323329000 |
| C | -2.062048000 | 0.031036000  | -0.495449000 |
| C | -2.672601000 | 0.174323000  | 0.864750000  |
| C | -2.268932000 | 1.202303000  | 1.729699000  |
| C | -3.659680000 | -0.710142000 | 1.319188000  |
| H | -1.483501000 | 1.881593000  | 1.401414000  |
| H | -3.974692000 | -1.526750000 | 0.672638000  |
| C | -2.838646000 | 1.352093000  | 2.988118000  |

|   |              |              |              |
|---|--------------|--------------|--------------|
| C | -4.234709000 | -0.562904000 | 2.578348000  |
| H | -2.505020000 | 2.157460000  | 3.638500000  |
| H | -5.003194000 | -1.259748000 | 2.904771000  |
| C | -3.828408000 | 0.470172000  | 3.419120000  |
| H | -4.275507000 | 0.584531000  | 4.403167000  |
| C | -2.424968000 | 2.434783000  | -1.167066000 |
| C | -1.656362000 | 3.597859000  | -1.380229000 |
| C | -3.797369000 | 2.602709000  | -0.880941000 |
| H | -0.609583000 | 3.470759000  | -1.658487000 |
| H | -4.409384000 | 1.718221000  | -0.717796000 |
| C | -2.210579000 | 4.863332000  | -1.245712000 |
| C | -4.360067000 | 3.867620000  | -0.796005000 |
| H | -1.591938000 | 5.745414000  | -1.395180000 |
| H | -5.420898000 | 3.972608000  | -0.580739000 |
| C | -3.569103000 | 5.005779000  | -0.962060000 |
| H | -4.012237000 | 5.995216000  | -0.886379000 |

## I10

**M06-L/BSI SCF energy in gas:** -1873.364839 a.u.

**M06/BSII SCF energy in benzene:** -1872.767956 a.u.

**M06/BSII//M06-L/BSI free energy in benzene:** -1872.096405 a.u.

**M06/BSII//M06-L/BSI entalphy in benzene:** -1871.978369 a.u.

|    |              |              |              |
|----|--------------|--------------|--------------|
| Pd | -0.225969000 | -0.254616000 | -0.274176000 |
| B  | -2.122732000 | -1.058938000 | 0.005028000  |
| B  | 2.448280000  | -1.595568000 | -0.145033000 |
| O  | -3.066748000 | -1.365276000 | -0.970643000 |

|   |              |              |              |
|---|--------------|--------------|--------------|
| O | -2.681400000 | -1.173631000 | 1.277725000  |
| O | 1.116442000  | -1.971434000 | -0.422735000 |
| O | 3.198792000  | -2.703891000 | 0.154755000  |
| C | 1.721764000  | 0.721970000  | -0.248486000 |
| C | 2.817091000  | -0.108511000 | -0.176312000 |
| C | -4.249313000 | -1.877354000 | -0.303590000 |
| C | -4.119030000 | -1.251456000 | 1.112697000  |
| C | 0.932381000  | -3.347124000 | 0.025636000  |
| C | 2.391844000  | -3.882919000 | -0.105769000 |
| C | 4.230347000  | 0.333749000  | -0.114493000 |
| C | 4.688866000  | 1.436146000  | -0.854594000 |
| C | 5.167882000  | -0.354519000 | 0.672889000  |
| H | 3.986019000  | 1.972134000  | -1.487519000 |
| H | 4.843668000  | -1.222586000 | 1.241111000  |
| C | 6.015231000  | 1.844398000  | -0.794385000 |
| C | 6.495578000  | 0.056315000  | 0.737596000  |
| H | 6.340867000  | 2.699799000  | -1.381468000 |
| H | 7.197593000  | -0.491136000 | 1.362528000  |
| C | 6.927489000  | 1.159608000  | 0.006353000  |
| H | 7.965537000  | 1.478307000  | 0.052787000  |
| C | 1.778696000  | 2.173093000  | -0.053285000 |
| C | 1.074440000  | 3.053468000  | -0.897085000 |
| C | 2.405097000  | 2.733072000  | 1.078559000  |
| H | 0.568802000  | 2.638809000  | -1.768482000 |
| H | 2.960990000  | 2.075253000  | 1.743675000  |

|   |              |             |              |
|---|--------------|-------------|--------------|
| C | 1.000078000  | 4.414669000 | -0.629571000 |
| C | 2.310759000  | 4.091209000 | 1.360252000  |
| H | 0.447517000  | 5.065825000 | -1.304418000 |
| H | 2.796330000  | 4.489922000 | 2.248464000  |
| C | 1.607167000  | 4.943904000 | 0.509736000  |
| H | 1.535952000  | 6.006013000 | 0.729487000  |
| C | -1.420044000 | 1.290786000 | -0.240651000 |
| N | -2.198902000 | 1.780765000 | -1.246324000 |
| H | -3.321769000 | 0.939733000 | -2.806691000 |
| C | -2.284765000 | 1.185722000 | -2.560420000 |
| H | -1.880372000 | 1.864915000 | -3.318017000 |
| C | -2.865525000 | 2.938165000 | -0.853636000 |
| H | -4.635986000 | 3.037552000 | -2.062730000 |
| C | -3.786361000 | 3.661215000 | -1.757221000 |
| H | -4.190961000 | 4.546543000 | -1.262239000 |
| H | -3.288987000 | 3.995880000 | -2.675012000 |
| C | -2.499570000 | 3.172884000 | 0.438075000  |
| C | -2.866417000 | 4.255207000 | 1.375950000  |
| H | -1.994717000 | 4.853656000 | 1.667118000  |
| H | -3.591753000 | 4.930954000 | 0.917817000  |
| H | -3.314187000 | 3.865628000 | 2.298087000  |
| N | -1.623308000 | 2.152513000 | 0.790920000  |
| C | -0.972805000 | 2.032070000 | 2.076335000  |
| H | -0.394416000 | 2.934195000 | 2.296588000  |
| H | -1.710389000 | 1.857443000 | 2.866304000  |



|   |              |              |              |
|---|--------------|--------------|--------------|
| H | -0.294015000 | 1.177218000  | 2.023464000  |
| H | -1.701132000 | 0.263240000  | -2.545024000 |
| C | -0.091725000 | -4.004121000 | -0.872617000 |
| H | -1.049163000 | -3.481721000 | -0.772260000 |
| H | 0.199444000  | -3.962221000 | -1.923527000 |
| H | -0.239899000 | -5.051914000 | -0.590196000 |
| C | 0.437206000  | -3.292297000 | 1.461036000  |
| H | 1.167592000  | -2.804221000 | 2.114141000  |
| H | -0.493010000 | -2.714010000 | 1.498610000  |
| H | 0.240229000  | -4.295120000 | 1.852675000  |
| C | 2.727943000  | -4.345870000 | -1.515652000 |
| H | 2.449370000  | -3.592600000 | -2.258013000 |
| H | 3.805316000  | -4.511015000 | -1.590544000 |
| H | 2.217750000  | -5.281575000 | -1.764573000 |
| C | 2.758437000  | -4.947450000 | 0.907423000  |
| H | 3.792902000  | -5.265909000 | 0.755223000  |
| H | 2.664994000  | -4.578178000 | 1.930296000  |
| H | 2.114432000  | -5.826227000 | 0.794999000  |
| C | -4.704371000 | -2.080060000 | 2.236699000  |
| H | -5.781110000 | -2.227874000 | 2.095812000  |
| H | -4.227467000 | -3.060017000 | 2.302357000  |
| H | -4.559010000 | -1.571396000 | 3.193670000  |
| C | -4.640210000 | 0.180885000  | 1.168065000  |
| H | -4.307760000 | 0.648617000  | 2.099796000  |
| H | -4.240501000 | 0.773380000  | 0.336999000  |

|   |              |              |              |
|---|--------------|--------------|--------------|
| H | -5.733913000 | 0.223907000  | 1.132226000  |
| C | -4.136030000 | -3.395473000 | -0.285415000 |
| H | -5.033964000 | -3.867197000 | 0.127160000  |
| H | -3.993364000 | -3.760093000 | -1.306314000 |
| H | -3.274850000 | -3.715155000 | 0.310756000  |
| C | -5.469968000 | -1.440065000 | -1.088075000 |
| H | -5.482947000 | -0.357223000 | -1.237580000 |
| H | -5.473237000 | -1.915591000 | -2.072974000 |
| H | -6.393787000 | -1.728075000 | -0.573709000 |

## I11

**M06-L/BSI SCF energy in gas:** -1873,379953 a.u.

**M06/BSII SCF energy in benzene:** -1872,785985 a.u.

**M06/BSII//M06-L/BSI free energy in benzene:** -1872,115628 a.u.

**M06/BSII//M06-L/BSI entalphy in benzene:** -1871,996723 a.u.

|    |              |              |              |
|----|--------------|--------------|--------------|
| Pd | -0.225969000 | -0.254616000 | -0.274176000 |
| B  | -2.122732000 | -1.058938000 | 0.005028000  |
| B  | 2.448280000  | -1.595568000 | -0.145033000 |
| O  | -3.066748000 | -1.365276000 | -0.970643000 |
| O  | -2.681400000 | -1.173631000 | 1.277725000  |
| O  | 1.116442000  | -1.971434000 | -0.422735000 |
| O  | 3.198792000  | -2.703891000 | 0.154755000  |
| C  | 1.721764000  | 0.721970000  | -0.248486000 |
| C  | 2.817091000  | -0.108511000 | -0.176312000 |
| C  | -4.249313000 | -1.877354000 | -0.303590000 |
| C  | -4.119030000 | -1.251456000 | 1.112697000  |

|   |              |              |              |
|---|--------------|--------------|--------------|
| C | 0.932381000  | -3.347124000 | 0.025636000  |
| C | 2.391844000  | -3.882919000 | -0.105769000 |
| C | 4.230347000  | 0.333749000  | -0.114493000 |
| C | 4.688866000  | 1.436146000  | -0.854594000 |
| C | 5.167882000  | -0.354519000 | 0.672889000  |
| H | 3.986019000  | 1.972134000  | -1.487519000 |
| H | 4.843668000  | -1.222586000 | 1.241111000  |
| C | 6.015231000  | 1.844398000  | -0.794385000 |
| C | 6.495578000  | 0.056315000  | 0.737596000  |
| H | 6.340867000  | 2.699799000  | -1.381468000 |
| H | 7.197593000  | -0.491136000 | 1.362528000  |
| C | 6.927489000  | 1.159608000  | 0.006353000  |
| H | 7.965537000  | 1.478307000  | 0.052787000  |
| C | 1.778696000  | 2.173093000  | -0.053285000 |
| C | 1.074440000  | 3.053468000  | -0.897085000 |
| C | 2.405097000  | 2.733072000  | 1.078559000  |
| H | 0.568802000  | 2.638809000  | -1.768482000 |
| H | 2.960990000  | 2.075253000  | 1.743675000  |
| C | 1.000078000  | 4.414669000  | -0.629571000 |
| C | 2.310759000  | 4.091209000  | 1.360252000  |
| H | 0.447517000  | 5.065825000  | -1.304418000 |
| H | 2.796330000  | 4.489922000  | 2.248464000  |
| C | 1.607167000  | 4.943904000  | 0.509736000  |
| H | 1.535952000  | 6.006013000  | 0.729487000  |
| C | -1.420044000 | 1.290786000  | -0.240651000 |

|   |              |              |              |
|---|--------------|--------------|--------------|
| N | -2.198902000 | 1.780765000  | -1.246324000 |
| H | -3.321769000 | 0.939733000  | -2.806691000 |
| C | -2.284765000 | 1.185722000  | -2.560420000 |
| H | -1.880372000 | 1.864915000  | -3.318017000 |
| C | -2.865525000 | 2.938165000  | -0.853636000 |
| H | -4.635986000 | 3.037552000  | -2.062730000 |
| C | -3.786361000 | 3.661215000  | -1.757221000 |
| H | -4.190961000 | 4.546543000  | -1.262239000 |
| H | -3.288987000 | 3.995880000  | -2.675012000 |
| C | -2.499570000 | 3.172884000  | 0.438075000  |
| C | -2.866417000 | 4.255207000  | 1.375950000  |
| H | -1.994717000 | 4.853656000  | 1.667118000  |
| H | -3.591753000 | 4.930954000  | 0.917817000  |
| H | -3.314187000 | 3.865628000  | 2.298087000  |
| N | -1.623308000 | 2.152513000  | 0.790920000  |
| C | -0.972805000 | 2.032070000  | 2.076335000  |
| H | -0.394416000 | 2.934195000  | 2.296588000  |
| H | -1.710389000 | 1.857443000  | 2.866304000  |
| H | -0.294015000 | 1.177218000  | 2.023464000  |
| H | -1.701132000 | 0.263240000  | -2.545024000 |
| C | -0.091725000 | -4.004121000 | -0.872617000 |
| H | -1.049163000 | -3.481721000 | -0.772260000 |
| H | 0.199444000  | -3.962221000 | -1.923527000 |
| H | -0.239899000 | -5.051914000 | -0.590196000 |
| C | 0.437206000  | -3.292297000 | 1.461036000  |

|   |              |              |              |
|---|--------------|--------------|--------------|
| H | 1.167592000  | -2.804221000 | 2.114141000  |
| H | -0.493010000 | -2.714010000 | 1.498610000  |
| H | 0.240229000  | -4.295120000 | 1.852675000  |
| C | 2.727943000  | -4.345870000 | -1.515652000 |
| H | 2.449370000  | -3.592600000 | -2.258013000 |
| H | 3.805316000  | -4.511015000 | -1.590544000 |
| H | 2.217750000  | -5.281575000 | -1.764573000 |
| C | 2.758437000  | -4.947450000 | 0.907423000  |
| H | 3.792902000  | -5.265909000 | 0.755223000  |
| H | 2.664994000  | -4.578178000 | 1.930296000  |
| H | 2.114432000  | -5.826227000 | 0.794999000  |
| C | -4.704371000 | -2.080060000 | 2.236699000  |
| H | -5.781110000 | -2.227874000 | 2.095812000  |
| H | -4.227467000 | -3.060017000 | 2.302357000  |
| H | -4.559010000 | -1.571396000 | 3.193670000  |
| C | -4.640210000 | 0.180885000  | 1.168065000  |
| H | -4.307760000 | 0.648617000  | 2.099796000  |
| H | -4.240501000 | 0.773380000  | 0.336999000  |
| H | -5.733913000 | 0.223907000  | 1.132226000  |
| C | -4.136030000 | -3.395473000 | -0.285415000 |
| H | -5.033964000 | -3.867197000 | 0.127160000  |
| H | -3.993364000 | -3.760093000 | -1.306314000 |
| H | -3.274850000 | -3.715155000 | 0.310756000  |
| C | -5.469968000 | -1.440065000 | -1.088075000 |
| H | -5.482947000 | -0.357223000 | -1.237580000 |

H -5.473237000 -1.915591000 -2.072974000

H -6.393787000 -1.728075000 -0.573709000

## I12

**M06-L/BSI SCF energy in gas:** -1873,379953 a.u.

**M06/BSII SCF energy in benzene:** -1872,785985 a.u.

**M06/BSII//M06-L/BSI free energy in benzene:** -1872,115628 a.u.

**M06/BSII//M06-L/BSI entalphy in benzene:** -1871,996723 a.u.

Pd 0.224399000 0.430461000 -0.209020000

B 1.530249000 -1.044287000 0.016140000

B -2.607064000 1.376012000 -0.050885000

O 2.035731000 -1.421782000 1.249839000

O 2.167439000 -1.697525000 -1.025214000

O -1.435320000 2.035184000 -0.459855000

O -3.560271000 2.287308000 0.341666000

C -1.456540000 -0.796212000 -0.216627000

C -2.670076000 -0.155603000 -0.084731000

C 2.881461000 -2.580029000 1.033570000

C 3.294005000 -2.414293000 -0.462609000

C -1.519931000 3.402010000 0.017698000

C -3.064648000 3.613287000 0.026781000

C -3.991481000 -0.829743000 -0.004584000

C -4.345565000 -1.902677000 -0.838823000

C -4.952182000 -0.378872000 0.915086000

H -3.626686000 -2.262340000 -1.570475000

H -4.708838000 0.460212000 1.561474000

|   |              |              |              |
|---|--------------|--------------|--------------|
| C | -5.593222000 | -2.507829000 | -0.742870000 |
| C | -6.199652000 | -0.985796000 | 1.014534000  |
| H | -5.838872000 | -3.337065000 | -1.402032000 |
| H | -6.919857000 | -0.618620000 | 1.742058000  |
| C | -6.527507000 | -2.056399000 | 0.187646000  |
| H | -7.502183000 | -2.531612000 | 0.262910000  |
| C | -1.354767000 | -2.265696000 | -0.232210000 |
| C | -0.722934000 | -2.920450000 | -1.303378000 |
| C | -1.861990000 | -3.057879000 | 0.811397000  |
| H | -0.284658000 | -2.316161000 | -2.094392000 |
| H | -2.353551000 | -2.568308000 | 1.648812000  |
| C | -0.656588000 | -4.308720000 | -1.358633000 |
| C | -1.759670000 | -4.444440000 | 0.774636000  |
| H | -0.184701000 | -4.790467000 | -2.212559000 |
| H | -2.155965000 | -5.034012000 | 1.598180000  |
| C | -1.172108000 | -5.080519000 | -0.317709000 |
| H | -1.106981000 | -6.164826000 | -0.352515000 |
| C | 2.029915000  | 1.464625000  | -0.088659000 |
| N | 2.785595000  | 1.701548000  | 1.021126000  |
| H | 2.962832000  | 0.675208000  | 2.841847000  |
| C | 2.329442000  | 1.429597000  | 2.367254000  |
| H | 2.329391000  | 2.343759000  | 2.969780000  |
| C | 4.057879000  | 2.161920000  | 0.699750000  |
| H | 5.340209000  | 1.571064000  | 2.313847000  |
| C | 5.078236000  | 2.460892000  | 1.728287000  |

|   |              |             |              |
|---|--------------|-------------|--------------|
| H | 5.995720000  | 2.828902000 | 1.264109000  |
| H | 4.739644000  | 3.222598000 | 2.439902000  |
| C | 4.108075000  | 2.223444000 | -0.662765000 |
| C | 5.200333000  | 2.612533000 | -1.581457000 |
| H | 4.913742000  | 3.440055000 | -2.240508000 |
| H | 6.080306000  | 2.931043000 | -1.018472000 |
| H | 5.507387000  | 1.780887000 | -2.227253000 |
| N | 2.864406000  | 1.795851000 | -1.114224000 |
| C | 2.497155000  | 1.638484000 | -2.503547000 |
| H | 2.494897000  | 2.602297000 | -3.022543000 |
| H | 3.188644000  | 0.959227000 | -3.010501000 |
| H | 1.494684000  | 1.202556000 | -2.527203000 |
| H | 1.316260000  | 1.026378000 | 2.297993000  |
| C | -0.741763000 | 4.287960000 | -0.931440000 |
| H | 0.321402000  | 4.028632000 | -0.884616000 |
| H | -1.075376000 | 4.163595000 | -1.963501000 |
| H | -0.845420000 | 5.342921000 | -0.655784000 |
| C | -0.908318000 | 3.436236000 | 1.410488000  |
| H | -1.460040000 | 2.787759000 | 2.098662000  |
| H | 0.121323000  | 3.068650000 | 1.351545000  |
| H | -0.892760000 | 4.450074000 | 1.822608000  |
| C | -3.613682000 | 3.984553000 | -1.342817000 |
| H | -3.240409000 | 3.304873000 | -2.114107000 |
| H | -4.703413000 | 3.909930000 | -1.325695000 |
| H | -3.342512000 | 5.007597000 | -1.622407000 |



|   |              |              |              |
|---|--------------|--------------|--------------|
| C | -3.561296000 | 4.576775000  | 1.084677000  |
| H | -4.649578000 | 4.661471000  | 1.031581000  |
| H | -3.297983000 | 4.240420000  | 2.089440000  |
| H | -3.137657000 | 5.575032000  | 0.930312000  |
| C | 3.466323000  | -3.714315000 | -1.221614000 |
| H | 4.252096000  | -4.331160000 | -0.770962000 |
| H | 2.537867000  | -4.289764000 | -1.237106000 |
| H | 3.753039000  | -3.508697000 | -2.256858000 |
| C | 4.512516000  | -1.516305000 | -0.640977000 |
| H | 4.623338000  | -1.267062000 | -1.700930000 |
| H | 4.392828000  | -0.578674000 | -0.085533000 |
| H | 5.434713000  | -2.002301000 | -0.305309000 |
| C | 2.023909000  | -3.810825000 | 1.280677000  |
| H | 2.606053000  | -4.734836000 | 1.198857000  |
| H | 1.600657000  | -3.758435000 | 2.287319000  |
| H | 1.190426000  | -3.860527000 | 0.573731000  |
| C | 4.030956000  | -2.514640000 | 2.020406000  |
| H | 4.564425000  | -1.561951000 | 1.952550000  |
| H | 3.650491000  | -2.617395000 | 3.040669000  |
| H | 4.748441000  | -3.324499000 | 1.847306000  |

### I13

**M06-L/BSI SCF energy in gas:** -2256.825485 a.u.

**M06/BSII SCF energy in benzene:** - 2256.088614 a.u.

**M06/BSII//M06-L/BSI free energy in benzene:** -2255.247331 a.u.

**M06/BSII//M06-L/BSI entalphy in benzene:** -2255.103653 a.u.

|    |              |              |              |
|----|--------------|--------------|--------------|
| Pd | -0.929235000 | 0.525867000  | 0.079620000  |
| B  | -0.752936000 | -1.022971000 | 1.385466000  |
| B  | 1.389752000  | -1.656003000 | -0.974176000 |
| O  | -0.984347000 | -0.920435000 | 2.761779000  |
| O  | -0.302894000 | -2.305394000 | 1.077520000  |
| O  | 0.362855000  | -1.518125000 | -1.900208000 |
| O  | 1.956423000  | -2.916251000 | -1.034782000 |
| C  | 1.119155000  | 0.418520000  | 0.451900000  |
| C  | 1.963110000  | -0.503043000 | -0.104349000 |
| C  | -0.835626000 | -2.241565000 | 3.340915000  |
| C  | 0.099828000  | -2.940409000 | 2.314387000  |
| C  | 0.107362000  | -2.814657000 | -2.488595000 |
| C  | 1.449156000  | -3.573762000 | -2.211599000 |
| C  | 3.435020000  | -0.497525000 | 0.089304000  |
| C  | 4.283473000  | -0.801361000 | -0.989042000 |
| C  | 4.044198000  | -0.216684000 | 1.323901000  |
| H  | 3.838867000  | -1.036194000 | -1.955812000 |
| H  | 3.416022000  | 0.009676000  | 2.181842000  |
| C  | 5.666846000  | -0.803467000 | -0.852945000 |
| C  | 5.426811000  | -0.221579000 | 1.465879000  |
| H  | 6.293300000  | -1.037317000 | -1.710778000 |
| H  | 5.867019000  | -0.003853000 | 2.436243000  |
| C  | 6.248424000  | -0.511443000 | 0.378305000  |
| H  | 7.329411000  | -0.516142000 | 0.491129000  |
| C  | 1.564635000  | 1.596207000  | 1.218599000  |

|   |              |              |              |
|---|--------------|--------------|--------------|
| C | 2.476865000  | 2.519781000  | 0.677497000  |
| C | 0.984984000  | 1.905323000  | 2.463157000  |
| H | 2.944482000  | 2.290203000  | -0.278939000 |
| H | 0.263712000  | 1.205388000  | 2.883461000  |
| C | 2.770877000  | 3.711150000  | 1.332203000  |
| C | 1.313433000  | 3.076170000  | 3.137710000  |
| H | 3.458613000  | 4.419877000  | 0.873398000  |
| H | 0.863184000  | 3.282605000  | 4.106622000  |
| C | 2.195437000  | 3.997155000  | 2.569637000  |
| H | 2.435296000  | 4.922733000  | 3.087528000  |
| C | -2.966230000 | 0.346636000  | -0.210465000 |
| N | -3.564819000 | 0.088895000  | -1.409668000 |
| H | -3.255257000 | -0.812236000 | -3.272992000 |
| C | -2.814668000 | -0.036653000 | -2.639219000 |
| H | -2.798321000 | 0.909132000  | -3.193826000 |
| C | -4.951919000 | 0.022772000  | -1.303431000 |
| H | -5.647101000 | -1.230721000 | -2.905432000 |
| C | -5.833738000 | -0.245574000 | -2.460887000 |
| H | -6.882276000 | -0.221593000 | -2.155435000 |
| H | -5.706348000 | 0.494473000  | -3.259593000 |
| C | -5.241141000 | 0.236146000  | 0.010983000  |
| C | -6.533759000 | 0.271458000  | 0.730408000  |
| H | -6.687617000 | 1.221656000  | 1.255392000  |
| H | -7.364540000 | 0.144595000  | 0.032363000  |
| H | -6.613636000 | -0.523219000 | 1.481870000  |

|   |              |              |              |
|---|--------------|--------------|--------------|
| N | -4.018964000 | 0.425602000  | 0.652698000  |
| C | -3.870693000 | 0.680241000  | 2.067839000  |
| H | -4.277288000 | 1.662041000  | 2.335164000  |
| H | -4.391962000 | -0.084797000 | 2.651562000  |
| H | -2.805907000 | 0.640072000  | 2.309940000  |
| H | -1.786888000 | -0.314305000 | -2.380872000 |
| C | -0.207962000 | -2.613605000 | -3.960574000 |
| H | -1.157901000 | -2.080874000 | -4.069202000 |
| H | 0.564511000  | -2.031231000 | -4.468221000 |
| H | -0.308496000 | -3.576188000 | -4.474226000 |
| C | -1.090731000 | -3.424461000 | -1.775849000 |
| H | -0.887518000 | -3.565189000 | -0.713113000 |
| H | -1.940008000 | -2.737421000 | -1.852426000 |
| H | -1.376993000 | -4.380123000 | -2.228078000 |
| C | 2.486900000  | -3.360581000 | -3.307756000 |
| H | 2.230473000  | -3.891930000 | -4.229953000 |
| H | 2.592986000  | -2.295999000 | -3.542854000 |
| H | 3.456582000  | -3.722602000 | -2.955981000 |
| C | 1.288265000  | -5.052591000 | -1.920618000 |
| H | 2.263283000  | -5.497442000 | -1.703788000 |
| H | 0.638017000  | -5.222341000 | -1.060082000 |
| H | 0.862505000  | -5.577501000 | -2.783139000 |
| C | -0.094902000 | -4.435358000 | 2.166272000  |
| H | 0.124813000  | -4.958716000 | 3.103649000  |
| H | -1.115264000 | -4.681835000 | 1.861610000  |

|   |              |              |              |
|---|--------------|--------------|--------------|
| H | 0.590808000  | -4.813668000 | 1.401627000  |
| C | 1.568435000  | -2.611054000 | 2.541161000  |
| H | 2.148006000  | -2.911783000 | 1.663875000  |
| H | 1.708271000  | -1.533262000 | 2.673332000  |
| H | 1.966896000  | -3.127766000 | 3.420781000  |
| C | -2.222972000 | -2.867886000 | 3.392544000  |
| H | -2.209172000 | -3.852739000 | 3.871499000  |
| H | -2.890898000 | -2.219865000 | 3.967521000  |
| H | -2.637257000 | -2.977693000 | 2.384750000  |
| C | -0.259741000 | -2.098541000 | 4.735097000  |
| H | 0.657072000  | -1.505513000 | 4.728513000  |
| H | -0.978856000 | -1.599678000 | 5.391495000  |
| H | -0.035128000 | -3.079287000 | 5.169833000  |
| C | -0.487633000 | 2.402582000  | -1.003356000 |
| N | -0.593582000 | 3.634322000  | -0.428680000 |
| H | -2.159052000 | 4.682897000  | 0.505499000  |
| C | -1.421084000 | 3.903849000  | 0.725079000  |
| H | -1.930419000 | 2.972953000  | 0.988070000  |
| H | -0.806617000 | 4.217230000  | 1.574902000  |
| C | 0.252508000  | 4.570963000  | -1.012595000 |
| C | 0.905825000  | 3.914942000  | -2.012315000 |
| N | 0.432366000  | 2.606258000  | -1.987939000 |
| C | 0.921828000  | 1.551017000  | -2.845413000 |
| H | 2.000567000  | 1.409776000  | -2.708680000 |
| H | 0.726073000  | 1.780773000  | -3.898980000 |

|   |              |             |              |
|---|--------------|-------------|--------------|
| H | 0.424337000  | 0.621060000 | -2.563266000 |
| H | 2.150337000  | 5.437653000 | -2.815842000 |
| H | 2.906616000  | 3.843494000 | -2.781207000 |
| C | 1.958024000  | 4.370033000 | -2.946905000 |
| H | 1.683896000  | 4.210882000 | -3.996517000 |
| H | 1.100823000  | 6.517145000 | -1.106431000 |
| H | -0.566963000 | 6.501922000 | -0.525325000 |
| H | 0.743254000  | 5.961278000 | 0.531078000  |
| C | 0.382579000  | 5.953957000 | -0.505513000 |

### TSRE1

Imaginary Frequency: -80.57

**M06-L/BSI SCF energy in gas: -2256.822705 a.u.**

**M06/BSII SCF energy in benzene: -2256.085285 a.u.**

**M06/BSII//M06-L/BSI free energy in benzene: -2255.242756 a.u.**

**M06/BSII//M06-L/BSI entalphy in benzene: -2255.103388 a.u.**

|    |              |              |              |
|----|--------------|--------------|--------------|
| Pd | -0.936815000 | 0.651606000  | 0.004821000  |
| B  | -0.489859000 | -0.821574000 | 1.349954000  |
| B  | 1.283724000  | -1.820207000 | -0.845281000 |
| O  | -0.656959000 | -0.694446000 | 2.744397000  |
| O  | -0.422418000 | -2.192147000 | 1.021141000  |
| O  | 0.300786000  | -1.592472000 | -1.796240000 |
| O  | 1.819344000  | -3.087578000 | -0.956002000 |
| C  | 1.039128000  | 0.208818000  | 0.667291000  |
| C  | 1.878623000  | -0.706773000 | 0.074566000  |
| C  | -0.893215000 | -2.013178000 | 3.283825000  |

|   |              |              |              |
|---|--------------|--------------|--------------|
| C | -0.178758000 | -2.919938000 | 2.243103000  |
| C | 0.011998000  | -2.855432000 | -2.444427000 |
| C | 1.323973000  | -3.666010000 | -2.181096000 |
| C | 3.344150000  | -0.727893000 | 0.267946000  |
| C | 4.195285000  | -1.055733000 | -0.801276000 |
| C | 3.944821000  | -0.456529000 | 1.509960000  |
| H | 3.757468000  | -1.286044000 | -1.771316000 |
| H | 3.310002000  | -0.213042000 | 2.358788000  |
| C | 5.576819000  | -1.080986000 | -0.650353000 |
| C | 5.324294000  | -0.491756000 | 1.666423000  |
| H | 6.207497000  | -1.328352000 | -1.500997000 |
| H | 5.758941000  | -0.282641000 | 2.640885000  |
| C | 6.150761000  | -0.797818000 | 0.586304000  |
| H | 7.230128000  | -0.822891000 | 0.710095000  |
| C | 1.539862000  | 1.429359000  | 1.339999000  |
| C | 2.473822000  | 2.243211000  | 0.668660000  |
| C | 1.033956000  | 1.903333000  | 2.564476000  |
| H | 2.874756000  | 1.898928000  | -0.282817000 |
| H | 0.313650000  | 1.292003000  | 3.100790000  |
| C | 2.862351000  | 3.475144000  | 1.174537000  |
| C | 1.449424000  | 3.125858000  | 3.085995000  |
| H | 3.566097000  | 4.088097000  | 0.612678000  |
| H | 1.051422000  | 3.460568000  | 4.041807000  |
| C | 2.355377000  | 3.927795000  | 2.393340000  |
| H | 2.667289000  | 4.887415000  | 2.798662000  |

|   |              |              |              |
|---|--------------|--------------|--------------|
| C | -2.968883000 | 0.476014000  | -0.225648000 |
| N | -3.631424000 | 0.156968000  | -1.378620000 |
| H | -3.403204000 | -0.883181000 | -3.182154000 |
| C | -2.943137000 | -0.057754000 | -2.629858000 |
| H | -2.961872000 | 0.842495000  | -3.255607000 |
| C | -5.013751000 | 0.147286000  | -1.211633000 |
| H | -5.815354000 | -1.191721000 | -2.690625000 |
| C | -5.951189000 | -0.171376000 | -2.311363000 |
| H | -6.985559000 | -0.087460000 | -1.969726000 |
| H | -5.831078000 | 0.504554000  | -3.166314000 |
| C | -5.239711000 | 0.458432000  | 0.095640000  |
| C | -6.499277000 | 0.579070000  | 0.862829000  |
| H | -6.604423000 | 1.563742000  | 1.333486000  |
| H | -7.362065000 | 0.434778000  | 0.208071000  |
| H | -6.570568000 | -0.165578000 | 1.665200000  |
| N | -3.985016000 | 0.645712000  | 0.673241000  |
| C | -3.759146000 | 1.007676000  | 2.053061000  |
| H | -3.986905000 | 2.065300000  | 2.231119000  |
| H | -4.386039000 | 0.401798000  | 2.714003000  |
| H | -2.704751000 | 0.819830000  | 2.280616000  |
| H | -1.901548000 | -0.305500000 | -2.399525000 |
| C | -0.274009000 | -2.582611000 | -3.910193000 |
| H | -1.204763000 | -2.015975000 | -4.009909000 |
| H | 0.524341000  | -2.004077000 | -4.381064000 |
| H | -0.395266000 | -3.519113000 | -4.465914000 |



|   |              |              |              |
|---|--------------|--------------|--------------|
| C | -1.213221000 | -3.457059000 | -1.772636000 |
| H | -1.025959000 | -3.661891000 | -0.717839000 |
| H | -2.035094000 | -2.735712000 | -1.816604000 |
| H | -1.528339000 | -4.377351000 | -2.275877000 |
| C | 2.391469000  | -3.419073000 | -3.240572000 |
| H | 2.145305000  | -3.898133000 | -4.193707000 |
| H | 2.521479000  | -2.346158000 | -3.420460000 |
| H | 3.346221000  | -3.817757000 | -2.887489000 |
| C | 1.119398000  | -5.153063000 | -1.973833000 |
| H | 2.078744000  | -5.636482000 | -1.770539000 |
| H | 0.454350000  | -5.350381000 | -1.130508000 |
| H | 0.690413000  | -5.617482000 | -2.868670000 |
| C | -0.760489000 | -4.312189000 | 2.100350000  |
| H | -0.703562000 | -4.860467000 | 3.047596000  |
| H | -1.804448000 | -4.281033000 | 1.778761000  |
| H | -0.191446000 | -4.879147000 | 1.356068000  |
| C | 1.325565000  | -2.991516000 | 2.472966000  |
| H | 1.811008000  | -3.415800000 | 1.589527000  |
| H | 1.746914000  | -1.994840000 | 2.635828000  |
| H | 1.569111000  | -3.614926000 | 3.339671000  |
| C | -2.401706000 | -2.231395000 | 3.306364000  |
| H | -2.667717000 | -3.199914000 | 3.743068000  |
| H | -2.869591000 | -1.447804000 | 3.909793000  |
| H | -2.814885000 | -2.175785000 | 2.293442000  |
| C | -0.323177000 | -2.080734000 | 4.686371000  |

|   |              |              |              |
|---|--------------|--------------|--------------|
| H | 0.726235000  | -1.780203000 | 4.705424000  |
| H | -0.877324000 | -1.412895000 | 5.352396000  |
| H | -0.400497000 | -3.096389000 | 5.091264000  |
| C | -0.311922000 | 2.447200000  | -1.130715000 |
| N | -0.335360000 | 3.707425000  | -0.605522000 |
| H | -1.778884000 | 4.963042000  | 0.266188000  |
| C | -1.175767000 | 4.081439000  | 0.508107000  |
| H | -1.828938000 | 3.231970000  | 0.723647000  |
| H | -0.568350000 | 4.290742000  | 1.395094000  |
| C | 0.618072000  | 4.544794000  | -1.173847000 |
| C | 1.260929000  | 3.798105000  | -2.114540000 |
| N | 0.672387000  | 2.537309000  | -2.073109000 |
| C | 1.115257000  | 1.408109000  | -2.856942000 |
| H | 2.163489000  | 1.169296000  | -2.636695000 |
| H | 1.021003000  | 1.610714000  | -3.929758000 |
| H | 0.507848000  | 0.543067000  | -2.582510000 |
| H | 2.702506000  | 5.165920000  | -2.867490000 |
| H | 3.277732000  | 3.499954000  | -2.776993000 |
| C | 2.401696000  | 4.123372000  | -2.998315000 |
| H | 2.167757000  | 3.978926000  | -4.059875000 |
| H | 1.648793000  | 6.400919000  | -1.276585000 |
| H | -0.047144000 | 6.561721000  | -0.813059000 |
| H | 1.132820000  | 5.948022000  | 0.350754000  |
| C | 0.843036000  | 5.930230000  | -0.707788000 |

**I14**

**M06-L/BSI SCF energy in gas: -2256.841866 a.u.**

**M06/BSII SCF energy in benzene: -2256.113692 a.u.**

**M06/BSII//M06-L/BSI free energy in benzene: -2255.269635 a.u.**

**M06/BSII//M06-L/BSI entalphy in benzene: -2255.12637 a.u.**

|    |              |              |              |
|----|--------------|--------------|--------------|
| Pd | 1.563445000  | -1.652858000 | -0.902529000 |
| B  | 0.012139000  | 0.492498000  | 1.684603000  |
| B  | -1.485124000 | 2.351108000  | -0.065165000 |
| O  | 0.565635000  | 0.098563000  | 2.882077000  |
| O  | 0.767377000  | 1.459497000  | 1.044346000  |
| O  | -1.173138000 | 2.498960000  | -1.398451000 |
| O  | -1.480630000 | 3.543334000  | 0.624612000  |
| C  | -1.429298000 | 0.104635000  | 1.242549000  |
| C  | -2.111992000 | 1.034866000  | 0.509180000  |
| C  | 1.878851000  | 0.699318000  | 2.979270000  |
| C  | 1.760927000  | 1.912873000  | 2.003549000  |
| C  | -0.766020000 | 3.879276000  | -1.589080000 |
| C  | -1.428863000 | 4.595322000  | -0.370104000 |
| C  | -3.578049000 | 1.005380000  | 0.264376000  |
| C  | -4.116009000 | 1.336720000  | -0.991130000 |
| C  | -4.477435000 | 0.738141000  | 1.310732000  |
| H  | -3.440577000 | 1.582582000  | -1.808278000 |
| H  | -4.081073000 | 0.504582000  | 2.295429000  |
| C  | -5.492965000 | 1.349967000  | -1.202440000 |
| C  | -5.849113000 | 0.767419000  | 1.103122000  |
| H  | -5.882695000 | 1.594381000  | -2.187711000 |

|   |              |              |              |
|---|--------------|--------------|--------------|
| H | -6.521513000 | 0.559653000  | 1.931479000  |
| C | -6.366017000 | 1.063432000  | -0.158148000 |
| H | -7.440395000 | 1.081787000  | -0.319844000 |
| C | -2.045606000 | -1.162042000 | 1.707083000  |
| C | -2.917149000 | -1.879035000 | 0.872524000  |
| C | -1.779985000 | -1.700270000 | 2.977570000  |
| H | -3.120038000 | -1.497083000 | -0.123456000 |
| H | -1.100060000 | -1.179874000 | 3.642609000  |
| C | -3.517113000 | -3.059545000 | 1.287343000  |
| C | -2.383023000 | -2.883134000 | 3.396346000  |
| H | -4.187191000 | -3.583938000 | 0.608196000  |
| H | -2.167182000 | -3.269207000 | 4.389730000  |
| C | -3.257070000 | -3.570238000 | 2.558023000  |
| H | -3.727368000 | -4.493428000 | 2.888066000  |
| C | 3.456051000  | -0.897134000 | -0.885669000 |
| N | 3.927101000  | 0.254129000  | -1.465798000 |
| H | 3.192657000  | 2.192622000  | -1.762251000 |
| C | 3.068142000  | 1.180372000  | -2.162190000 |
| H | 3.279340000  | 1.194099000  | -3.237192000 |
| C | 5.286012000  | 0.451667000  | -1.245429000 |
| H | 5.620807000  | 2.572765000  | -1.312465000 |
| C | 6.012231000  | 1.641317000  | -1.742073000 |
| H | 7.071849000  | 1.582787000  | -1.481652000 |
| H | 5.946372000  | 1.742487000  | -2.831684000 |
| C | 5.707443000  | -0.611990000 | -0.503109000 |

|   |              |              |              |
|---|--------------|--------------|--------------|
| C | 7.037939000  | -0.946433000 | 0.051194000  |
| H | 7.416460000  | -1.904747000 | -0.324118000 |
| H | 7.769487000  | -0.179039000 | -0.213074000 |
| H | 7.019935000  | -1.019715000 | 1.145747000  |
| N | 4.589303000  | -1.413391000 | -0.306704000 |
| C | 4.585026000  | -2.636067000 | 0.458918000  |
| H | 5.243775000  | -3.387159000 | 0.010725000  |
| H | 4.904752000  | -2.455304000 | 1.491426000  |
| H | 3.553194000  | -3.005049000 | 0.454692000  |
| H | 2.036638000  | 0.848570000  | -1.994208000 |
| C | -1.262594000 | 4.340798000  | -2.944494000 |
| H | -0.769249000 | 3.770707000  | -3.736300000 |
| H | -2.340494000 | 4.199649000  | -3.049424000 |
| H | -1.036005000 | 5.400903000  | -3.103061000 |
| C | 0.752226000  | 3.900998000  | -1.537414000 |
| H | 1.108234000  | 3.504594000  | -0.581288000 |
| H | 1.143055000  | 3.259659000  | -2.331266000 |
| H | 1.150570000  | 4.910371000  | -1.682195000 |
| C | -2.870504000 | 5.006077000  | -0.637232000 |
| H | -2.933584000 | 5.838847000  | -1.344521000 |
| H | -3.450981000 | 4.166870000  | -1.034479000 |
| H | -3.335486000 | 5.314976000  | 0.302232000  |
| C | -0.641441000 | 5.763265000  | 0.188019000  |
| H | -1.144965000 | 6.162604000  | 1.072567000  |
| H | 0.370252000  | 5.471295000  | 0.478077000  |

|   |              |              |              |
|---|--------------|--------------|--------------|
| H | -0.566299000 | 6.569118000  | -0.550337000 |
| C | 3.048026000  | 2.239545000  | 1.275137000  |
| H | 3.840039000  | 2.485272000  | 1.991948000  |
| H | 3.378774000  | 1.397019000  | 0.665838000  |
| H | 2.910540000  | 3.109942000  | 0.624504000  |
| C | 1.188511000  | 3.155328000  | 2.670143000  |
| H | 0.949397000  | 3.897065000  | 1.903795000  |
| H | 0.259027000  | 2.929884000  | 3.201319000  |
| H | 1.897799000  | 3.596808000  | 3.377257000  |
| C | 2.872474000  | -0.355232000 | 2.522067000  |
| H | 3.906683000  | 0.007523000  | 2.559526000  |
| H | 2.789344000  | -1.228562000 | 3.175754000  |
| H | 2.640909000  | -0.676561000 | 1.498683000  |
| C | 2.126937000  | 1.083365000  | 4.425149000  |
| H | 1.333994000  | 1.721380000  | 4.820871000  |
| H | 2.178715000  | 0.183958000  | 5.044326000  |
| H | 3.080226000  | 1.613907000  | 4.525354000  |
| C | -0.248666000 | -2.547465000 | -1.191222000 |
| N | -0.654706000 | -3.807070000 | -0.837414000 |
| H | 0.262470000  | -5.631017000 | -0.339670000 |
| C | 0.083100000  | -4.637046000 | 0.082868000  |
| H | 1.039249000  | -4.135463000 | 0.264375000  |
| H | -0.458282000 | -4.742315000 | 1.030572000  |
| C | -1.887575000 | -4.143520000 | -1.379046000 |
| C | -2.292108000 | -3.060793000 | -2.103660000 |

|   |              |              |              |
|---|--------------|--------------|--------------|
| N | -1.284952000 | -2.112630000 | -1.974121000 |
| C | -1.333592000 | -0.787088000 | -2.542126000 |
| H | -2.190762000 | -0.227582000 | -2.150439000 |
| H | -1.401996000 | -0.826535000 | -3.634520000 |
| H | -0.412330000 | -0.274829000 | -2.247800000 |
| H | -4.212511000 | -3.660432000 | -2.793811000 |
| H | -4.093417000 | -1.939171000 | -2.412578000 |
| C | -3.548509000 | -2.793312000 | -2.838424000 |
| H | -3.376663000 | -2.564238000 | -3.896880000 |
| H | -3.530131000 | -5.475867000 | -1.596554000 |
| H | -1.968612000 | -6.291576000 | -1.484468000 |
| H | -2.706745000 | -5.599459000 | -0.038306000 |
| C | -2.550309000 | -5.439263000 | -1.112928000 |

## TSRE2

Imaginary Frequency: -141.74

**M06-L/BSI SCF energy in gas: -2256.815845 a.u.**

**M06/BSII SCF energy in benzene: -2256.077022 a.u.**

**M06/BSII//M06-L/BSI free energy in benzene: -2255.230936 a.u.**

**M06/BSII//M06-L/BSI entalphy in benzene: -2255.092964 a.u.**

|    |              |              |              |
|----|--------------|--------------|--------------|
| Pd | 1.099999000  | -0.613077000 | -0.626200000 |
| B  | 1.501468000  | 1.124388000  | 0.345216000  |
| B  | -2.980742000 | 0.772988000  | 0.574788000  |
| O  | 1.668010000  | 1.311563000  | 1.729088000  |
| O  | 2.145519000  | 2.157735000  | -0.349637000 |
| O  | -3.865520000 | 0.409906000  | -0.423145000 |

|   |              |              |              |
|---|--------------|--------------|--------------|
| O | -3.601622000 | 1.458428000  | 1.595431000  |
| C | -0.470671000 | 0.836214000  | -0.122420000 |
| C | -1.489436000 | 0.296063000  | 0.622801000  |
| C | 2.647389000  | 2.351297000  | 1.926011000  |
| C | 2.555337000  | 3.162989000  | 0.596577000  |
| C | -5.131932000 | 1.063014000  | -0.151381000 |
| C | -5.030793000 | 1.369407000  | 1.380038000  |
| C | -1.344979000 | -0.924406000 | 1.448412000  |
| C | -0.246351000 | -1.176472000 | 2.292026000  |
| C | -2.365582000 | -1.890259000 | 1.406360000  |
| H | 0.539732000  | -0.430386000 | 2.367241000  |
| H | -3.214948000 | -1.730215000 | 0.742571000  |
| C | -0.184035000 | -2.342755000 | 3.047945000  |
| C | -2.291712000 | -3.065734000 | 2.148352000  |
| H | 0.667176000  | -2.505448000 | 3.707623000  |
| H | -3.092164000 | -3.799640000 | 2.074318000  |
| C | -1.199486000 | -3.299752000 | 2.977730000  |
| H | -1.142561000 | -4.208715000 | 3.571940000  |
| C | -0.781611000 | 2.014168000  | -0.961358000 |
| C | -1.620885000 | 3.053961000  | -0.524104000 |
| C | -0.200349000 | 2.151898000  | -2.234847000 |
| H | -2.021234000 | 3.024620000  | 0.487707000  |
| H | 0.507050000  | 1.385054000  | -2.554112000 |
| C | -1.907907000 | 4.146367000  | -1.338814000 |
| C | -0.498721000 | 3.230613000  | -3.056515000 |



|   |              |              |              |
|---|--------------|--------------|--------------|
| H | -2.555688000 | 4.937904000  | -0.966576000 |
| H | -0.045075000 | 3.299069000  | -4.042608000 |
| C | -1.360753000 | 4.235531000  | -2.615373000 |
| H | -1.584024000 | 5.087523000  | -3.251962000 |
| C | -0.212048000 | -2.239384000 | -1.351985000 |
| N | -1.447475000 | -2.131074000 | -1.921648000 |
| H | -2.194189000 | -1.250477000 | -3.671731000 |
| C | -1.883474000 | -0.967271000 | -2.660270000 |
| H | -2.708125000 | -0.460011000 | -2.150092000 |
| C | -2.235655000 | -3.256686000 | -1.715784000 |
| H | -3.722765000 | -3.300696000 | -3.273022000 |
| C | -3.638126000 | -3.340506000 | -2.180138000 |
| H | -4.098788000 | -4.274841000 | -1.849223000 |
| H | -4.239303000 | -2.511620000 | -1.784256000 |
| C | -1.467605000 | -4.131371000 | -1.006237000 |
| C | -1.762001000 | -5.474740000 | -0.462083000 |
| H | -1.594707000 | -5.511112000 | 0.621997000  |
| H | -2.805590000 | -5.743445000 | -0.644953000 |
| H | -1.138973000 | -6.258059000 | -0.911379000 |
| N | -0.246607000 | -3.496070000 | -0.813012000 |
| C | 0.852807000  | -4.072683000 | -0.076358000 |
| H | 0.643504000  | -4.085508000 | 1.000331000  |
| H | 1.045450000  | -5.096210000 | -0.413989000 |
| H | 1.732012000  | -3.451641000 | -0.262781000 |
| H | -1.037861000 | -0.281544000 | -2.720699000 |

|   |              |              |              |
|---|--------------|--------------|--------------|
| C | -6.248372000 | 0.112470000  | -0.536626000 |
| H | -6.230524000 | -0.063654000 | -1.616160000 |
| H | -6.150062000 | -0.853017000 | -0.034827000 |
| H | -7.226520000 | 0.535377000  | -0.282887000 |
| C | -5.178684000 | 2.315366000  | -1.012024000 |
| H | -4.368777000 | 3.002132000  | -0.752840000 |
| H | -5.049149000 | 2.037627000  | -2.061614000 |
| H | -6.133262000 | 2.840583000  | -0.908298000 |
| C | -5.528820000 | 0.228078000  | 2.255143000  |
| H | -6.614683000 | 0.107559000  | 2.190316000  |
| H | -5.055569000 | -0.718833000 | 1.976897000  |
| H | -5.265877000 | 0.434000000  | 3.295502000  |
| C | -5.664816000 | 2.679915000  | 1.801774000  |
| H | -5.536518000 | 2.827454000  | 2.877162000  |
| H | -5.208522000 | 3.528573000  | 1.287437000  |
| H | -6.738984000 | 2.681440000  | 1.586533000  |
| C | 3.870313000  | 3.751356000  | 0.118944000  |
| H | 4.281709000  | 4.456474000  | 0.850107000  |
| H | 4.613830000  | 2.970642000  | -0.065342000 |
| H | 3.714025000  | 4.294159000  | -0.818033000 |
| C | 1.477341000  | 4.236373000  | 0.635074000  |
| H | 1.315397000  | 4.621578000  | -0.375522000 |
| H | 0.527322000  | 3.824633000  | 0.986759000  |
| H | 1.757363000  | 5.073093000  | 1.284303000  |
| C | 4.003305000  | 1.677802000  | 2.107858000  |

|   |             |              |              |
|---|-------------|--------------|--------------|
| H | 4.792940000 | 2.405481000  | 2.324328000  |
| H | 3.946483000 | 0.980113000  | 2.949623000  |
| H | 4.288763000 | 1.114461000  | 1.214013000  |
| C | 2.284396000 | 3.133729000  | 3.173690000  |
| H | 1.257834000 | 3.501830000  | 3.130879000  |
| H | 2.375853000 | 2.495777000  | 4.057522000  |
| H | 2.955470000 | 3.990082000  | 3.306586000  |
| H | 4.423355000 | -0.033763000 | -3.436139000 |
| H | 2.712417000 | -0.097565000 | -2.917732000 |
| C | 3.722066000 | 0.208466000  | -2.632461000 |
| H | 3.714603000 | 1.290516000  | -2.459821000 |
| H | 6.494459000 | 0.944282000  | -1.846974000 |
| H | 6.694875000 | -0.635908000 | -2.599557000 |
| C | 6.553321000 | -0.130515000 | -1.636391000 |
| H | 7.455227000 | -0.299899000 | -1.043391000 |
| C | 5.358770000 | -0.620491000 | -0.913672000 |
| N | 4.068503000 | -0.504071000 | -1.424627000 |
| C | 3.122314000 | -1.007505000 | -0.575163000 |
| N | 3.873475000 | -1.469264000 | 0.475213000  |
| H | 3.510619000 | -1.363447000 | 2.541288000  |
| C | 3.288770000 | -2.004492000 | 1.680537000  |
| H | 3.653596000 | -3.017173000 | 1.887165000  |
| H | 2.204605000 | -2.023879000 | 1.540892000  |
| C | 5.235970000 | -1.241074000 | 0.293163000  |
| C | 6.248734000 | -1.620316000 | 1.302404000  |

|   |             |              |             |
|---|-------------|--------------|-------------|
| H | 6.082671000 | -1.109218000 | 2.259399000 |
| H | 6.248463000 | -2.696833000 | 1.511341000 |
| H | 7.251489000 | -1.354339000 | 0.959525000 |

**L = PM<sub>3</sub>**

**1**

**M06-L/BSI SCF energy in gas: -1589.184936 a.u.**

**M06/BSII SCF energy in benzene: -1589.283781 a.u.**

**M06/BSII//M06-L/BSI free energy in benzene: -1589.344204 a.u.**

**M06/BSII//M06-L/BSI enthalpy in benzene: -1589.254433 a.u.**

|   |              |              |              |
|---|--------------|--------------|--------------|
| H | -3.975194000 | 5.240777000  | -0.002153000 |
| C | -3.403635000 | 4.316892000  | -0.010537000 |
| H | -4.929936000 | 3.173301000  | 0.991163000  |
| C | -3.938216000 | 3.155124000  | 0.545969000  |
| C | -3.212669000 | 1.971420000  | 0.533756000  |
| H | -3.628121000 | 1.064671000  | 0.967435000  |
| C | -1.922108000 | 1.922348000  | -0.028232000 |
| C | -1.398881000 | 3.102676000  | -0.581689000 |
| C | -2.131838000 | 4.283239000  | -0.579216000 |
| H | -1.709319000 | 5.182670000  | -1.020322000 |
| H | -0.405985000 | 3.061312000  | -1.026040000 |
| C | -1.176562000 | 0.690668000  | -0.031855000 |
| C | -1.226924000 | -0.600310000 | 0.038383000  |
| C | -2.066664000 | -1.769336000 | 0.031178000  |
| H | -3.700842000 | -0.777288000 | -0.961258000 |

|    |              |              |              |
|----|--------------|--------------|--------------|
| C  | -3.356993000 | -1.715126000 | -0.531019000 |
| C  | -4.172487000 | -2.838803000 | -0.547463000 |
| H  | -5.162600000 | -2.777601000 | -0.992262000 |
| C  | -3.729851000 | -4.041044000 | 0.004327000  |
| H  | -4.371207000 | -4.917723000 | -0.008020000 |
| C  | -2.459488000 | -4.108886000 | 0.573131000  |
| H  | -2.107909000 | -5.040086000 | 1.010312000  |
| C  | -1.637043000 | -2.989069000 | 0.579802000  |
| Pd | 0.758122000  | -0.030152000 | 0.004269000  |
| H  | -0.643502000 | -3.028294000 | 1.022937000  |
| P  | 2.101620000  | -1.946851000 | -0.116776000 |
| P  | 2.243230000  | 1.779244000  | 0.115858000  |
| C  | 3.840179000  | -1.816807000 | -0.710541000 |
| H  | 4.283974000  | -2.803229000 | -0.885137000 |
| H  | 3.875195000  | -1.245331000 | -1.642499000 |
| H  | 4.448226000  | -1.291262000 | 0.030367000  |
| C  | 1.474721000  | -3.225441000 | -1.276379000 |
| H  | 1.437152000  | -2.809250000 | -2.286250000 |
| H  | 2.110683000  | -4.117639000 | -1.283951000 |
| H  | 0.455904000  | -3.511675000 | -1.002575000 |
| C  | 2.383006000  | -2.950232000 | 1.398874000  |
| H  | 2.989821000  | -3.838882000 | 1.191605000  |
| H  | 2.893572000  | -2.342152000 | 2.150556000  |
| H  | 1.428743000  | -3.267369000 | 1.826843000  |
| C  | 3.970094000  | 1.522124000  | 0.702078000  |

|   |             |             |              |
|---|-------------|-------------|--------------|
| H | 3.969518000 | 0.959327000 | 1.639950000  |
| H | 4.530424000 | 0.945554000 | -0.038147000 |
| H | 4.488048000 | 2.473941000 | 0.863922000  |
| C | 2.592662000 | 2.754870000 | -1.404128000 |
| H | 3.266865000 | 3.594842000 | -1.202322000 |
| H | 3.050742000 | 2.107442000 | -2.156784000 |
| H | 1.663146000 | 3.143312000 | -1.827479000 |
| C | 1.720881000 | 3.104658000 | 1.275097000  |
| H | 1.654108000 | 2.694014000 | 2.285697000  |
| H | 2.426039000 | 3.943392000 | 1.278733000  |
| H | 0.726975000 | 3.470530000 | 1.003859000  |

### 1\_alkyne

**M06-L/BSI SCF energy in gas:** -1128.502476 a.u.

**M06/BSII SCF energy in benzene:** -1128.222198 a.u.

**M06/BSII//M06-L/BSI free energy in benzene:** -1127.966264 a.u.

**M06/BSII//M06-L/BSI entalphy in benzene:** -1127.894693 a.u.

|   |              |             |              |
|---|--------------|-------------|--------------|
| H | 0.394915000  | 6.334704000 | -0.114865000 |
| C | 0.479218000  | 5.252031000 | -0.086534000 |
| H | 2.630355000  | 5.262987000 | 0.033862000  |
| C | 1.733971000  | 4.649951000 | -0.002234000 |
| C | 1.847135000  | 3.267089000 | 0.033452000  |
| H | 2.824296000  | 2.795926000 | 0.096345000  |
| C | 0.697669000  | 2.456130000 | -0.014655000 |
| C | -0.561000000 | 3.075107000 | -0.097371000 |
| C | -0.665874000 | 4.458346000 | -0.133647000 |

|    |              |              |              |
|----|--------------|--------------|--------------|
| H  | -1.646241000 | 4.922432000  | -0.200336000 |
| H  | -1.442663000 | 2.437996000  | -0.133475000 |
| C  | 0.828860000  | 1.031347000  | 0.014034000  |
| C  | 1.371562000  | -0.108762000 | -0.006296000 |
| C  | 2.375917000  | -1.127395000 | -0.016771000 |
| H  | 3.963539000  | 0.215177000  | 0.554193000  |
| C  | 3.710605000  | -0.809564000 | 0.296935000  |
| C  | 4.689085000  | -1.794298000 | 0.284860000  |
| H  | 5.715083000  | -1.534341000 | 0.530671000  |
| C  | 4.361148000  | -3.109827000 | -0.039785000 |
| H  | 5.130429000  | -3.876989000 | -0.049136000 |
| C  | 3.042322000  | -3.436269000 | -0.352224000 |
| H  | 2.781241000  | -4.459768000 | -0.606847000 |
| C  | 2.057834000  | -2.458169000 | -0.339476000 |
| Pd | -0.722873000 | -0.407774000 | 0.040281000  |
| H  | 1.023168000  | -2.695055000 | -0.581091000 |
| P  | -2.893912000 | -1.182283000 | 0.051582000  |
| C  | -3.892030000 | -1.110938000 | 1.592449000  |
| H  | -4.891027000 | -1.537466000 | 1.447272000  |
| H  | -3.383369000 | -1.659790000 | 2.388082000  |
| H  | -3.994993000 | -0.073795000 | 1.920018000  |
| C  | -4.064713000 | -0.422412000 | -1.141421000 |
| H  | -3.679020000 | -0.531617000 | -2.157419000 |
| H  | -5.056513000 | -0.884841000 | -1.082726000 |
| H  | -4.162207000 | 0.646552000  | -0.936397000 |

|   |              |              |              |
|---|--------------|--------------|--------------|
| C | -3.060388000 | -2.959589000 | -0.379185000 |
| H | -2.638089000 | -3.141820000 | -1.369979000 |
| H | -2.506562000 | -3.569863000 | 0.338212000  |
| H | -4.109416000 | -3.275241000 | -0.375820000 |

## **II**

**M06-L/BSI SCF energy in gas:** -1050.173195 a.u.

**M06/BSII SCF energy in benzene:** -1050.079132 a.u.

**M06/BSII//M06-L/BSI free energy in benzene::** -1049.894013 a.u.

**M06/BSII//M06-L/BSI enthalpy in benzene:** -1049.832381 a.u.

|    |              |              |              |
|----|--------------|--------------|--------------|
| Pd | 0.000176000  | 0.018329000  | -0.024973000 |
| P  | -2.288722000 | -0.000771000 | 0.002236000  |
| P  | 2.288781000  | -0.000026000 | 0.002521000  |
| C  | -3.184543000 | 1.118613000  | -1.149478000 |
| H  | -2.896686000 | 2.154879000  | -0.957985000 |
| H  | -2.911860000 | 0.884481000  | -2.180977000 |
| H  | -4.271146000 | 1.025590000  | -1.039145000 |
| C  | -3.125775000 | -1.593394000 | -0.377774000 |
| H  | -4.216621000 | -1.498378000 | -0.327510000 |
| H  | -2.844858000 | -1.929949000 | -1.378394000 |
| H  | -2.803391000 | -2.358609000 | 0.332161000  |
| C  | -3.118594000 | 0.432776000  | 1.584979000  |
| H  | -2.830424000 | 1.441812000  | 1.889039000  |
| H  | -4.210130000 | 0.386656000  | 1.494777000  |
| H  | -2.798218000 | -0.254588000 | 2.371166000  |



|   |             |              |              |
|---|-------------|--------------|--------------|
| C | 3.184514000 | 1.116652000  | -1.151817000 |
| H | 4.271101000 | 1.017439000  | -1.046979000 |
| H | 2.905590000 | 0.886002000  | -2.182421000 |
| H | 2.903243000 | 2.154137000  | -0.957367000 |
| C | 3.121476000 | 0.433471000  | 1.583616000  |
| H | 2.803093000 | -0.255233000 | 2.369497000  |
| H | 4.212825000 | 0.387892000  | 1.491508000  |
| H | 2.833349000 | 1.441804000  | 1.889849000  |
| C | 3.122010000 | -1.595012000 | -0.376394000 |
| H | 2.801091000 | -2.357539000 | 0.337056000  |
| H | 2.836266000 | -1.933965000 | -1.374826000 |
| H | 4.213286000 | -1.502230000 | -0.330819000 |

## I2

**M06-L/BSI SCF energy in gas:** -1872.677405 a.u.

**M06/BSII SCF energy in benzene:** -1872.370043 a.u.

**M06/BSII//M06-L/BSI free energy in benzene:** -1871.837973 a.u.

**M06/BSII//M06-L/BSI entalphy in benzene:** -1871.736469 a.u.

|    |             |             |              |
|----|-------------|-------------|--------------|
| Pd | 0.000024000 | 0.000655000 | -1.181215000 |
| O  | 1.752033000 | 0.972276000 | 1.222406000  |
| C  | 2.994406000 | 0.407354000 | 1.701492000  |
| C  | 2.965083000 | 0.489486000 | 3.222505000  |
| H  | 2.811500000 | 1.528343000 | 3.525745000  |
| H  | 3.901514000 | 0.135735000 | 3.665876000  |

|   |              |              |              |
|---|--------------|--------------|--------------|
| H | 2.143161000  | -0.107634000 | 3.627955000  |
| C | 4.155573000  | 1.212105000  | 1.154541000  |
| H | 4.159720000  | 1.232617000  | 0.062727000  |
| H | 4.099294000  | 2.243803000  | 1.514556000  |
| H | 5.110433000  | 0.792108000  | 1.489446000  |
| H | 3.228129000  | -2.100957000 | 3.059175000  |
| C | 3.624993000  | -2.081504000 | 2.042199000  |
| H | 4.699156000  | -1.870645000 | 2.091540000  |
| H | 3.500349000  | -3.080697000 | 1.614387000  |
| C | 2.909632000  | -1.057510000 | 1.183634000  |
| C | 3.338492000  | -1.187003000 | -0.273120000 |
| H | 2.811754000  | -0.456613000 | -0.901507000 |
| H | 3.077860000  | -2.185500000 | -0.637937000 |
| H | 4.418508000  | -1.051728000 | -0.393874000 |
| O | 1.490277000  | -1.313357000 | 1.247394000  |
| B | 0.841499000  | -0.087598000 | 1.086849000  |
| B | -0.841628000 | 0.086056000  | 1.086862000  |
| O | -1.752230000 | -0.973866000 | 1.221460000  |
| O | -1.490326000 | 1.311760000  | 1.248267000  |
| C | -2.994513000 | -0.409252000 | 1.701153000  |
| C | -2.909708000 | 1.056026000  | 1.184439000  |
| C | -3.338679000 | 1.186709000  | -0.272159000 |
| H | -2.811961000 | 0.456867000  | -0.901188000 |
| H | -3.078118000 | 2.185526000  | -0.636131000 |
| H | -4.160121000 | -1.233240000 | 0.061917000  |

|   |              |              |              |
|---|--------------|--------------|--------------|
| H | -4.418698000 | 1.051496000  | -0.392941000 |
| C | -4.155799000 | -1.213526000 | 1.153745000  |
| H | -4.099509000 | -2.245496000 | 1.512970000  |
| H | -5.110596000 | -0.793754000 | 1.489101000  |
| H | -4.699107000 | 1.868633000  | 2.093113000  |
| H | -3.500159000 | 3.078915000  | 1.616912000  |
| C | -3.624916000 | 2.079382000  | 2.043894000  |
| H | -3.227985000 | 2.097926000  | 3.060864000  |
| H | -3.901323000 | -0.139209000 | 3.665907000  |
| C | -2.964960000 | -0.492588000 | 3.222091000  |
| H | -2.811307000 | -1.531683000 | 3.524474000  |
| H | -2.142978000 | 0.104225000  | 3.627869000  |
| P | -0.429829000 | -2.257415000 | -1.568184000 |
| C | 0.411275000  | -3.009476000 | -3.020921000 |
| H | 1.495343000  | -2.943634000 | -2.897321000 |
| H | 0.134165000  | -4.062149000 | -3.150301000 |
| H | -2.314409000 | -3.714237000 | -2.186456000 |
| H | 0.147317000  | -2.459896000 | -3.927820000 |
| C | -2.182060000 | -2.653731000 | -1.943906000 |
| H | -2.783186000 | -2.416451000 | -1.062514000 |
| H | -2.541974000 | -2.047861000 | -2.779197000 |
| H | -0.644207000 | -3.242544000 | 0.623736000  |
| C | -0.092610000 | -3.514283000 | -0.278851000 |
| H | 0.967710000  | -3.514731000 | -0.021186000 |
| H | -0.394521000 | -4.512690000 | -0.615283000 |

|   |              |             |              |
|---|--------------|-------------|--------------|
| P | 0.429994000  | 2.259281000 | -1.565776000 |
| C | -0.411118000 | 3.012924000 | -3.017699000 |
| H | -1.495191000 | 2.946887000 | -2.894283000 |
| H | -0.134058000 | 4.065762000 | -3.145819000 |
| H | 2.314186000  | 3.717142000 | -2.182602000 |
| H | -0.147036000 | 2.464410000 | -3.925209000 |
| C | 2.182138000  | 2.656351000 | -1.941140000 |
| H | 2.783456000  | 2.418297000 | -1.060099000 |
| H | 2.542107000  | 2.051465000 | -2.777121000 |
| H | 0.644291000  | 3.241878000 | 0.627231000  |
| C | 0.092596000  | 3.514605000 | -0.275002000 |
| H | -0.967721000 | 3.514507000 | -0.017318000 |
| H | 0.394313000  | 4.513471000 | -0.610252000 |

## **TSOA1**

Imaginary Frequency: -27.95

**M06-L/BSI SCF energy in gas:** -1872.652767 a.u.

**M06/BSII SCF energy in benzene:** -1872.346353 a.u.

**M06/BSII//M06-L/BSI free energy in benzene:** -1871.816433 a.u.

**M06/BSII//M06-L/BSI entalphy in benzene:** -1871.714744 a.u.

|    |             |              |             |
|----|-------------|--------------|-------------|
| Pd | 0.278952000 | 1.173647000  | 0.032573000 |
| O  | 1.603524000 | -1.546203000 | 0.696422000 |
| C  | 2.108311000 | -2.737527000 | 0.050466000 |
| C  | 1.217049000 | -3.890118000 | 0.494803000 |
| H  | 1.211950000 | -3.940098000 | 1.586624000 |

|   |              |              |              |
|---|--------------|--------------|--------------|
| H | 1.563728000  | -4.851723000 | 0.102458000  |
| H | 0.185540000  | -3.734596000 | 0.164562000  |
| C | 3.536511000  | -2.978954000 | 0.497681000  |
| H | 4.175839000  | -2.115214000 | 0.300535000  |
| H | 3.563935000  | -3.182792000 | 1.571711000  |
| H | 3.964599000  | -3.844908000 | -0.019789000 |
| H | 0.696144000  | -4.052766000 | -2.070403000 |
| C | 1.636731000  | -3.575197000 | -2.354447000 |
| H | 2.435205000  | -4.324096000 | -2.305840000 |
| H | 1.546253000  | -3.247849000 | -3.393698000 |
| C | 1.948570000  | -2.390896000 | -1.461243000 |
| C | 3.123581000  | -1.595739000 | -2.013118000 |
| H | 3.350306000  | -0.740392000 | -1.369042000 |
| H | 2.862945000  | -1.210795000 | -3.002403000 |
| H | 4.024945000  | -2.210009000 | -2.108651000 |
| O | 0.804857000  | -1.506336000 | -1.455455000 |
| B | 0.715964000  | -0.930852000 | -0.190427000 |
| B | -1.054205000 | -0.515544000 | 0.239694000  |
| O | -2.123509000 | -0.640929000 | -0.654072000 |
| O | -1.392816000 | -1.032027000 | 1.486373000  |
| C | -3.097069000 | -1.519563000 | -0.043082000 |
| C | -2.806114000 | -1.333713000 | 1.477540000  |
| C | -3.521094000 | -0.131732000 | 2.078052000  |
| H | -3.349981000 | 0.763500000  | 1.472407000  |
| H | -3.122316000 | 0.059108000  | 3.077548000  |

|   |              |              |              |
|---|--------------|--------------|--------------|
| H | -4.706646000 | -0.066315000 | -0.225363000 |
| H | -4.600027000 | -0.296771000 | 2.163842000  |
| C | -4.488671000 | -1.106724000 | -0.478330000 |
| H | -4.591151000 | -1.220374000 | -1.561080000 |
| H | -5.247045000 | -1.737631000 | -0.001298000 |
| H | -4.082968000 | -2.895062000 | 2.266505000  |
| H | -2.806750000 | -2.358655000 | 3.369189000  |
| C | -3.037480000 | -2.571354000 | 2.321989000  |
| H | -2.400812000 | -3.398510000 | 1.999982000  |
| H | -3.503462000 | -3.663823000 | -0.175722000 |
| C | -2.784981000 | -2.924331000 | -0.543668000 |
| H | -2.809300000 | -2.928859000 | -1.636450000 |
| H | -1.781131000 | -3.232432000 | -0.235134000 |
| P | -1.241230000 | 2.622517000  | -1.020029000 |
| C | -0.896820000 | 4.420223000  | -1.232464000 |
| H | 0.121417000  | 4.554474000  | -1.607893000 |
| H | -1.596465000 | 4.897350000  | -1.928853000 |
| H | -3.590854000 | 3.287644000  | -1.355649000 |
| H | -0.962882000 | 4.928582000  | -0.266556000 |
| C | -3.036475000 | 2.678120000  | -0.633033000 |
| H | -3.419139000 | 1.653849000  | -0.663498000 |
| H | -3.202879000 | 3.080310000  | 0.369772000  |
| H | -1.660680000 | 1.032369000  | -2.783972000 |
| C | -1.316752000 | 2.069904000  | -2.768691000 |
| H | -0.318381000 | 2.097907000  | -3.212045000 |

|   |              |              |              |
|---|--------------|--------------|--------------|
| H | -1.992161000 | 2.691374000  | -3.367975000 |
| P | 2.284038000  | 1.919916000  | 0.985946000  |
| C | 2.834182000  | 3.675335000  | 0.877999000  |
| H | 2.011265000  | 4.334544000  | 1.167935000  |
| H | 3.695616000  | 3.880127000  | 1.524516000  |
| H | 4.660745000  | 1.432130000  | 1.428903000  |
| H | 3.104396000  | 3.918457000  | -0.153198000 |
| C | 3.891501000  | 1.063408000  | 0.740974000  |
| H | 3.735749000  | -0.005563000 | 0.912936000  |
| H | 4.244749000  | 1.199184000  | -0.284940000 |
| H | 1.919742000  | 0.680861000  | 3.036869000  |
| C | 2.105998000  | 1.732665000  | 2.804846000  |
| H | 1.246444000  | 2.308176000  | 3.156749000  |
| H | 3.002513000  | 2.068088000  | 3.339178000  |

### I3

**M06-L/BSI SCF energy in gas:** -1872.65783 a.u.

**M06/BSII SCF energy in benzene:** -1872.352225 a.u.

**M06/BSII//M06-L/BSI free energy in benzene:** -1871.823689 a.u.

**M06/BSII//M06-L/BSI entalphy in benzene:** -1871.719447 a.u.

|    |              |              |              |
|----|--------------|--------------|--------------|
| Pd | -1.170064000 | -0.000034000 | 0.000131000  |
| O  | 0.815345000  | -2.146510000 | -0.786367000 |
| C  | 2.130896000  | -2.689094000 | -0.509147000 |
| C  | 3.108714000  | -1.957693000 | -1.417009000 |
| H  | 2.804795000  | -2.097022000 | -2.457709000 |
| H  | 4.131353000  | -2.332298000 | -1.302109000 |

|   |             |              |              |
|---|-------------|--------------|--------------|
| H | 3.092119000 | -0.883813000 | -1.210726000 |
| C | 2.116529000 | -4.172311000 | -0.820716000 |
| H | 1.326262000 | -4.693295000 | -0.274618000 |
| H | 1.946766000 | -4.327422000 | -1.889844000 |
| H | 3.074957000 | -4.636987000 | -0.562946000 |
| H | 4.159571000 | -1.189559000 | 0.816562000  |
| C | 3.750507000 | -2.018962000 | 1.398374000  |
| H | 4.401769000 | -2.889192000 | 1.259173000  |
| H | 3.785402000 | -1.737305000 | 2.454613000  |
| C | 2.323381000 | -2.338297000 | 0.996097000  |
| C | 1.736207000 | -3.381789000 | 1.936953000  |
| H | 0.703069000 | -3.619528000 | 1.666692000  |
| H | 1.730413000 | -2.983676000 | 2.954939000  |
| H | 2.317272000 | -4.309833000 | 1.933781000  |
| O | 1.524421000 | -1.140088000 | 1.142391000  |
| B | 0.571878000 | -1.117759000 | 0.125385000  |
| B | 0.571654000 | 1.117979000  | -0.125394000 |
| O | 0.815007000 | 2.146778000  | 0.786338000  |
| O | 1.524199000 | 1.140350000  | -1.142385000 |
| C | 2.130531000 | 2.689448000  | 0.509139000  |
| C | 2.323097000 | 2.338617000  | -0.996090000 |
| C | 1.735924000 | 3.382043000  | -1.937013000 |
| H | 0.702762000 | 3.619762000  | -1.666839000 |
| H | 1.730215000 | 2.983910000  | -2.954991000 |
| H | 1.325731000 | 4.693566000  | 0.274542000  |



|   |              |             |              |
|---|--------------|-------------|--------------|
| H | 2.316956000  | 4.310110000 | -1.933818000 |
| C | 2.116047000  | 4.172680000 | 0.820662000  |
| H | 1.946271000  | 4.327810000 | 1.889784000  |
| H | 3.074437000  | 4.637423000 | 0.562872000  |
| H | 4.401472000  | 2.889593000 | -1.259090000 |
| H | 3.785221000  | 1.737643000 | -2.454526000 |
| C | 3.750253000  | 2.019330000 | -1.398299000 |
| H | 4.159325000  | 1.189970000 | -0.816433000 |
| H | 4.130974000  | 2.332844000 | 1.302208000  |
| C | 3.108361000  | 1.958160000 | 1.417082000  |
| H | 2.804381000  | 2.097516000 | 2.457761000  |
| H | 3.091866000  | 0.884263000 | 1.210870000  |
| P | -2.562227000 | 1.917269000 | 0.246078000  |
| C | -4.388821000 | 1.936630000 | 0.013782000  |
| H | -4.843207000 | 1.148047000 | 0.620033000  |
| H | -4.830554000 | 2.897658000 | 0.300537000  |
| H | -2.733410000 | 4.309214000 | -0.323292000 |
| H | -4.636428000 | 1.737195000 | -1.032520000 |
| C | -2.087568000 | 3.470718000 | -0.605981000 |
| H | -1.057126000 | 3.699479000 | -0.319197000 |
| H | -2.120510000 | 3.343313000 | -1.690854000 |
| H | -1.357785000 | 2.613623000 | 2.207966000  |
| C | -2.417672000 | 2.455701000 | 1.992696000  |
| H | -2.786787000 | 1.673970000 | 2.660962000  |
| H | -2.975054000 | 3.379953000 | 2.181980000  |

|   |              |              |              |
|---|--------------|--------------|--------------|
| P | -2.561733000 | -1.917777000 | -0.246074000 |
| C | -4.388287000 | -1.937576000 | -0.013515000 |
| H | -4.842912000 | -1.148900000 | -0.619465000 |
| H | -4.829900000 | -2.898600000 | -0.300467000 |
| H | -2.732431000 | -4.309932000 | 0.322496000  |
| H | -4.635745000 | -1.738452000 | 1.032881000  |
| C | -2.086601000 | -3.471463000 | 0.605286000  |
| H | -1.056226000 | -3.699997000 | 0.318068000  |
| H | -2.119225000 | -3.344458000 | 1.690215000  |
| H | -1.357360000 | -2.612914000 | -2.208411000 |
| C | -2.417274000 | -2.455510000 | -1.992911000 |
| H | -2.786847000 | -1.673702000 | -2.660838000 |
| H | -2.974277000 | -3.379942000 | -2.182434000 |

#### I4

**M06-L/BSI SCF energy in gas: -589.053808 a.u.**

**M06/BSII SCF energy in benzene: -588.9986361 a.u.**

**M06/BSII//M06-L/BSI free energy in benzene: -588.9170132 a.u.**

**M06/BSII//M06-L/BSI entalphy in benzene: -588.8752732 a.u.**

|    |              |              |              |
|----|--------------|--------------|--------------|
| Pd | 1.319568000  | -0.000216000 | 0.000069000  |
| P  | -0.859616000 | 0.000091000  | 0.000155000  |
| C  | -1.713339000 | 1.624557000  | 0.113566000  |
| H  | -2.803284000 | 1.504178000  | 0.108687000  |
| H  | -1.417676000 | 2.136171000  | 1.032147000  |
| H  | -1.422758000 | 2.256245000  | -0.728685000 |

|   |              |              |              |
|---|--------------|--------------|--------------|
| C | -1.714566000 | -0.713322000 | -1.463175000 |
| H | -1.422008000 | -1.757653000 | -1.592252000 |
| H | -2.804358000 | -0.660232000 | -1.353521000 |
| H | -1.422735000 | -0.170737000 | -2.364964000 |
| C | -1.715512000 | -0.910410000 | 1.349101000  |
| H | -1.425312000 | -1.963161000 | 1.329057000  |
| H | -1.422041000 | -0.501315000 | 2.318335000  |
| H | -2.805205000 | -0.839851000 | 1.248742000  |

## I5

**M06-L/BSI SCF energy in gas:** -1411.565926 a.u.

**M06/BSII SCF energy in benzene:** -1411.296669 a.u.

**M06/BSII//M06-L/BSI free energy in benzene:** -1410.873338 a.u.

**M06/BSII//M06-L/BSI entalphy in benzene:** -1410.786743 a.u.

|    |             |              |              |
|----|-------------|--------------|--------------|
| Pd | 0.375833000 | -0.778616000 | -0.866024000 |
| O  | 1.638292000 | 1.170757000  | -0.879419000 |
| C  | 3.056216000 | 1.219123000  | -0.536155000 |
| C  | 3.468968000 | 2.672445000  | -0.705791000 |
| H  | 3.264481000 | 2.989113000  | -1.731288000 |
| H  | 4.536015000 | 2.812036000  | -0.507024000 |
| H  | 2.904289000 | 3.323112000  | -0.032693000 |
| C  | 3.805351000 | 0.324356000  | -1.500257000 |
| H  | 3.380062000 | -0.684437000 | -1.510636000 |
| H  | 3.741409000 | 0.728387000  | -2.514145000 |
| H  | 4.864265000 | 0.254013000  | -1.229097000 |

|   |              |              |              |
|---|--------------|--------------|--------------|
| H | 3.875606000  | 2.550028000  | 1.863233000  |
| C | 4.077862000  | 1.478049000  | 1.829429000  |
| H | 5.099340000  | 1.328515000  | 1.462691000  |
| H | 4.028153000  | 1.094179000  | 2.851699000  |
| C | 3.079528000  | 0.741512000  | 0.956478000  |
| C | 3.270627000  | -0.762140000 | 1.104802000  |
| H | 2.533448000  | -1.305883000 | 0.498771000  |
| H | 3.120937000  | -1.039370000 | 2.152145000  |
| H | 4.275850000  | -1.074417000 | 0.804096000  |
| O | 1.745415000  | 1.053456000  | 1.427322000  |
| B | 0.904796000  | 1.116679000  | 0.334123000  |
| B | -0.771030000 | 1.193410000  | 0.250225000  |
| O | -1.664714000 | 0.775062000  | 1.229573000  |
| O | -1.426333000 | 1.794586000  | -0.818261000 |
| C | -2.971673000 | 1.278063000  | 0.866123000  |
| C | -2.837190000 | 1.509498000  | -0.671496000 |
| C | -3.121509000 | 0.259622000  | -1.492655000 |
| H | -2.502250000 | -0.574477000 | -1.143770000 |
| H | -2.854008000 | 0.448122000  | -2.535822000 |
| H | -3.785131000 | -0.732189000 | 0.840698000  |
| H | -4.176731000 | -0.030670000 | -1.453760000 |
| C | -4.010048000 | 0.248915000  | 1.266976000  |
| H | -4.033872000 | 0.144544000  | 2.355514000  |
| H | -5.010708000 | 0.547234000  | 0.935343000  |
| H | -4.704691000 | 2.537996000  | -1.036677000 |

|   |              |              |              |
|---|--------------|--------------|--------------|
| H | -3.474450000 | 2.779735000  | -2.284720000 |
| C | -3.632134000 | 2.683815000  | -1.207256000 |
| H | -3.332400000 | 3.623365000  | -0.739705000 |
| H | -4.175847000 | 2.990261000  | 1.481296000  |
| C | -3.177051000 | 2.572199000  | 1.642416000  |
| H | -3.054557000 | 2.374819000  | 2.710303000  |
| H | -2.437444000 | 3.323766000  | 1.351755000  |
| P | -0.489057000 | -2.588335000 | 0.112726000  |
| C | -2.114181000 | -3.309313000 | -0.359035000 |
| H | -2.103576000 | -3.613374000 | -1.408422000 |
| H | -2.355158000 | -4.179858000 | 0.261265000  |
| H | -1.133017000 | -3.244625000 | 2.393714000  |
| H | -2.905881000 | -2.565250000 | -0.236495000 |
| C | -0.727683000 | -2.346903000 | 1.912886000  |
| H | 0.232550000  | -2.095614000 | 2.371656000  |
| H | -1.394880000 | -1.497324000 | 2.076682000  |
| H | 1.536449000  | -3.877845000 | 0.507547000  |
| C | 0.548939000  | -4.106418000 | 0.098192000  |
| H | 0.685163000  | -4.462670000 | -0.925666000 |
| H | 0.097883000  | -4.908111000 | 0.694337000  |

## **TSOA2**

Imaginary Frequency: -24.16

**M06-L/BSI SCF energy in gas:** -1411.551301 a.u.

**M06/BSII SCF energy in benzene:** -1411.288794 a.u.

**M06/BSII//M06-L/BSI free energy in benzene:** -1410.868186 a.u.

**M06/BSII//M06-L/BSI entalphy in benzene: -1410.780572 a.u.**

|    |              |              |              |
|----|--------------|--------------|--------------|
| Pd | -0.762761000 | -1.077348000 | -0.357098000 |
| O  | 2.019880000  | -0.734583000 | -1.152304000 |
| C  | 3.403409000  | -0.842603000 | -0.716296000 |
| C  | 4.073882000  | 0.468556000  | -1.101711000 |
| H  | 3.970890000  | 0.623367000  | -2.178286000 |
| H  | 5.139652000  | 0.466784000  | -0.852055000 |
| H  | 3.600384000  | 1.314495000  | -0.594168000 |
| C  | 4.054960000  | -2.008280000 | -1.430026000 |
| H  | 3.490866000  | -2.932376000 | -1.290703000 |
| H  | 4.111407000  | -1.806294000 | -2.502782000 |
| H  | 5.075130000  | -2.166265000 | -1.063053000 |
| H  | 4.427675000  | 0.679115000  | 1.491204000  |
| C  | 4.364756000  | -0.399485000 | 1.647455000  |
| H  | 5.332971000  | -0.844851000 | 1.393181000  |
| H  | 4.183944000  | -0.574049000 | 2.711342000  |
| C  | 3.253296000  | -1.017865000 | 0.824587000  |
| C  | 3.020459000  | -2.465457000 | 1.235942000  |
| H  | 2.226779000  | -2.920387000 | 0.635247000  |
| H  | 2.708923000  | -2.494554000 | 2.282743000  |
| H  | 3.928156000  | -3.068032000 | 1.128890000  |
| O  | 2.019636000  | -0.304090000 | 1.101495000  |
| B  | 1.282964000  | -0.303015000 | -0.065375000 |
| B  | -0.097928000 | 0.900039000  | -0.093451000 |
| O  | -0.491724000 | 1.520283000  | 1.088966000  |

|   |              |              |              |
|---|--------------|--------------|--------------|
| O | -0.083442000 | 1.794329000  | -1.160536000 |
| C | -0.527885000 | 2.941908000  | 0.828958000  |
| C | -0.760575000 | 2.992651000  | -0.711124000 |
| C | -2.228416000 | 2.843037000  | -1.087867000 |
| H | -2.673289000 | 1.987526000  | -0.569425000 |
| H | -2.307949000 | 2.664988000  | -2.163303000 |
| H | -2.590582000 | 3.074323000  | 1.486161000  |
| H | -2.805210000 | 3.740546000  | -0.842140000 |
| C | -1.630913000 | 3.566806000  | 1.658538000  |
| H | -1.393984000 | 3.481010000  | 2.722456000  |
| H | -1.741451000 | 4.631432000  | 1.423266000  |
| H | -0.569132000 | 5.123612000  | -1.024402000 |
| H | -0.351913000 | 4.143637000  | -2.482225000 |
| C | -0.146689000 | 4.188667000  | -1.409286000 |
| H | 0.936492000  | 4.217490000  | -1.275433000 |
| H | 0.885091000  | 4.580158000  | 1.133220000  |
| C | 0.832907000  | 3.491644000  | 1.237816000  |
| H | 1.024222000  | 3.233146000  | 2.282191000  |
| H | 1.627925000  | 3.043872000  | 0.633131000  |
| P | -2.874325000 | -1.855345000 | 0.071190000  |
| C | -3.977791000 | -2.587057000 | -1.204780000 |
| H | -3.531165000 | -3.499304000 | -1.607121000 |
| H | -4.963676000 | -2.829691000 | -0.791962000 |
| H | -4.916721000 | -0.937179000 | 1.094051000  |
| H | -4.103982000 | -1.884927000 | -2.032033000 |

|   |              |              |              |
|---|--------------|--------------|--------------|
| C | -3.961032000 | -0.534986000 | 0.738513000  |
| H | -3.450872000 | -0.025328000 | 1.559651000  |
| H | -4.158961000 | 0.204844000  | -0.041188000 |
| H | -2.531922000 | -2.751527000 | 2.306063000  |
| C | -3.012923000 | -3.119072000 | 1.396822000  |
| H | -2.502095000 | -4.036821000 | 1.096342000  |
| H | -4.060338000 | -3.354027000 | 1.617689000  |

## I6

**M06-L/BSI SCF energy in gas:** -1411.551763 a.u.

**M06/BSII SCF energy in benzene:** -1411.288179 a.u.

**M06/BSII//M06-L/BSI free energy in benzene:** -1410.86764 a.u.

**M06/BSII//M06-L/BSI entalphy in benzene:** -1410.778559 a.u.

|    |              |              |              |
|----|--------------|--------------|--------------|
| Pd | -1.051609000 | -1.033186000 | -0.165997000 |
| O  | 1.731291000  | -1.318973000 | -1.090953000 |
| C  | 3.145581000  | -1.357987000 | -0.761468000 |
| C  | 3.747512000  | -0.084009000 | -1.338073000 |
| H  | 3.543202000  | -0.046263000 | -2.410777000 |
| H  | 4.830923000  | -0.038485000 | -1.188519000 |
| H  | 3.290556000  | 0.801997000  | -0.885673000 |
| C  | 3.766964000  | -2.583322000 | -1.398187000 |
| H  | 3.239811000  | -3.495761000 | -1.113023000 |
| H  | 3.729876000  | -2.498646000 | -2.487351000 |
| H  | 4.817643000  | -2.683733000 | -1.103847000 |
| H  | 4.337750000  | 0.391255000  | 1.159660000  |
| C  | 4.284993000  | -0.658103000 | 1.457201000  |



|   |              |              |              |
|---|--------------|--------------|--------------|
| H | 5.234380000  | -1.139307000 | 1.196819000  |
| H | 4.176531000  | -0.694977000 | 2.544394000  |
| C | 3.122290000  | -1.369319000 | 0.795829000  |
| C | 2.945302000  | -2.766028000 | 1.373998000  |
| H | 2.110434000  | -3.285326000 | 0.894205000  |
| H | 2.725973000  | -2.689655000 | 2.441759000  |
| H | 3.848631000  | -3.371730000 | 1.250011000  |
| O | 1.903699000  | -0.635952000 | 1.091190000  |
| B | 1.079477000  | -0.748600000 | -0.013157000 |
| B | -0.077615000 | 0.775251000  | -0.058828000 |
| O | -0.347265000 | 1.538385000  | 1.072177000  |
| O | 0.333479000  | 1.571806000  | -1.124340000 |
| C | 0.133579000  | 2.877609000  | 0.807761000  |
| C | 0.081855000  | 2.948063000  | -0.746984000 |
| C | -1.300323000 | 3.307505000  | -1.275813000 |
| H | -2.069910000 | 2.687013000  | -0.806327000 |
| H | -1.332050000 | 3.126708000  | -2.353213000 |
| H | -1.814326000 | 3.716526000  | 1.257633000  |
| H | -1.544711000 | 4.359421000  | -1.095757000 |
| C | -0.764623000 | 3.869125000  | 1.518715000  |
| H | -0.666596000 | 3.753996000  | 2.601436000  |
| H | -0.490717000 | 4.899012000  | 1.263838000  |
| H | 1.033867000  | 4.865648000  | -1.052973000 |
| H | 1.043949000  | 3.805167000  | -2.469913000 |
| C | 1.141474000  | 3.825717000  | -1.381176000 |

|   |              |              |              |
|---|--------------|--------------|--------------|
| H | 2.148050000  | 3.486814000  | -1.127400000 |
| H | 1.982278000  | 3.949445000  | 1.257846000  |
| C | 1.553654000  | 2.946359000  | 1.353073000  |
| H | 1.546212000  | 2.667175000  | 2.409477000  |
| H | 2.201146000  | 2.235545000  | 0.830928000  |
| P | -3.355908000 | -1.260422000 | 0.025748000  |
| C | -4.428492000 | -2.118214000 | -1.195651000 |
| H | -4.161686000 | -3.176226000 | -1.250919000 |
| H | -5.487853000 | -2.037125000 | -0.928042000 |
| H | -5.218517000 | 0.321739000  | 0.317535000  |
| H | -4.280827000 | -1.685392000 | -2.187626000 |
| C | -4.149403000 | 0.392263000  | 0.086595000  |
| H | -3.652834000 | 1.001874000  | 0.846652000  |
| H | -4.025950000 | 0.893246000  | -0.876622000 |
| H | -3.516958000 | -1.475475000 | 2.439831000  |
| C | -3.966079000 | -1.997716000 | 1.592244000  |
| H | -3.673340000 | -3.048364000 | 1.654090000  |
| H | -5.056969000 | -1.930251000 | 1.668445000  |

**I7**

**M06-L/BSI SCF energy in gas:** -2412.080668 a.u.

**M06/BSII SCF energy in benzene:** -2411.55787392 a.u.

**M06/BSII//M06-L/BSI free energy in benzene:** -2410.852175 a.u.

**M06/BSII//M06-L/BSI entalphy in benzene:** -2410.718364 a.u.

|    |              |              |              |
|----|--------------|--------------|--------------|
| Pd | -0.140557000 | -1.087923000 | 0.382132000  |
| O  | 1.344623000  | 0.147461000  | -1.953232000 |

|   |             |              |              |
|---|-------------|--------------|--------------|
| C | 2.569963000 | 0.123675000  | -2.723899000 |
| C | 3.493972000 | 1.180868000  | -2.136497000 |
| H | 2.999193000 | 2.155088000  | -2.177290000 |
| H | 4.437324000 | 1.245725000  | -2.688737000 |
| H | 3.709652000 | 0.965418000  | -1.085653000 |
| C | 2.238026000 | 0.459893000  | -4.164604000 |
| H | 1.475331000 | -0.207372000 | -4.572454000 |
| H | 1.855884000 | 1.482477000  | -4.225363000 |
| H | 3.128826000 | 0.393671000  | -4.799478000 |
| H | 5.024084000 | -0.851925000 | -1.631450000 |
| C | 4.593473000 | -1.469450000 | -2.422745000 |
| H | 5.055251000 | -1.180543000 | -3.373624000 |
| H | 4.862279000 | -2.509758000 | -2.219395000 |
| C | 3.085472000 | -1.328156000 | -2.487935000 |
| C | 2.511030000 | -2.325821000 | -3.484344000 |
| H | 1.422638000 | -2.232158000 | -3.556862000 |
| H | 2.742179000 | -3.343572000 | -3.156748000 |
| H | 2.931937000 | -2.185062000 | -4.485095000 |
| O | 2.536084000 | -1.649692000 | -1.184294000 |
| B | 1.440093000 | -0.817470000 | -0.955439000 |
| B | 1.625311000 | -0.287611000 | 1.137274000  |
| O | 2.282847000 | -1.032482000 | 2.112669000  |
| O | 2.214493000 | 0.972632000  | 1.015502000  |
| C | 3.493657000 | -0.326644000 | 2.475408000  |
| C | 3.131797000 | 1.145068000  | 2.123653000  |

|   |              |              |              |
|---|--------------|--------------|--------------|
| C | 2.357471000  | 1.856750000  | 3.224966000  |
| H | 1.526299000  | 1.239430000  | 3.580752000  |
| H | 1.936057000  | 2.783763000  | 2.824733000  |
| H | 2.935916000  | -0.305747000 | 4.573287000  |
| H | 2.993413000  | 2.104937000  | 4.080815000  |
| C | 3.784194000  | -0.578056000 | 3.940801000  |
| H | 3.996535000  | -1.638278000 | 4.102770000  |
| H | 4.658324000  | -0.006453000 | 4.272633000  |
| H | 5.053142000  | 2.074084000  | 2.465419000  |
| H | 3.965631000  | 3.009550000  | 1.432007000  |
| C | 4.302056000  | 1.996080000  | 1.671468000  |
| H | 4.785329000  | 1.581180000  | 0.783949000  |
| H | 5.578158000  | -0.431573000 | 1.833447000  |
| C | 4.607167000  | -0.879484000 | 1.597223000  |
| H | 4.677703000  | -1.960278000 | 1.742573000  |
| H | 4.380597000  | -0.707898000 | 0.540024000  |
| P | -1.376513000 | -0.869551000 | 2.405497000  |
| P | -1.306111000 | -2.433690000 | -1.199240000 |
| C | -1.970876000 | 0.833744000  | 2.733151000  |
| H | -2.446861000 | 0.922099000  | 3.715928000  |
| H | -1.127144000 | 1.528143000  | 2.676716000  |
| H | -2.685435000 | 1.132180000  | 1.960581000  |
| C | -0.431556000 | -1.231048000 | 3.936624000  |
| H | 0.465577000  | -0.610042000 | 3.976046000  |
| H | -1.037893000 | -1.062194000 | 4.833228000  |

|   |              |              |              |
|---|--------------|--------------|--------------|
| H | -0.091364000 | -2.269466000 | 3.920982000  |
| C | -2.891359000 | -1.854307000 | 2.762646000  |
| H | -3.305884000 | -1.614293000 | 3.748359000  |
| H | -3.659803000 | -1.664397000 | 2.009383000  |
| H | -2.647839000 | -2.920149000 | 2.738131000  |
| C | -2.926095000 | -3.289175000 | -0.993348000 |
| H | -2.930536000 | -3.872367000 | -0.068349000 |
| H | -3.738255000 | -2.559923000 | -0.942928000 |
| H | -3.126866000 | -3.965701000 | -1.831853000 |
| C | -1.570195000 | -1.628097000 | -2.824654000 |
| H | -0.657802000 | -1.104373000 | -3.122765000 |
| H | -1.863895000 | -2.343857000 | -3.600601000 |
| H | -2.354564000 | -0.872002000 | -2.724660000 |
| C | -0.263716000 | -3.883699000 | -1.623916000 |
| H | -0.630462000 | -4.407979000 | -2.513828000 |
| H | 0.767928000  | -3.562094000 | -1.780190000 |
| H | -0.262456000 | -4.580474000 | -0.781314000 |
| C | -2.400446000 | 2.667465000  | -0.695792000 |
| C | -3.436693000 | 2.034483000  | -0.585868000 |
| C | -4.603129000 | 1.252802000  | -0.409401000 |
| C | -5.890252000 | 1.802026000  | -0.550468000 |
| H | -5.989330000 | 2.850107000  | -0.817368000 |
| H | -8.003707000 | 1.455359000  | -0.455269000 |
| C | -7.016253000 | 1.016064000  | -0.344537000 |
| H | -7.770332000 | -0.936836000 | 0.169169000  |

|   |              |              |              |
|---|--------------|--------------|--------------|
| C | -6.886685000 | -0.326970000 | 0.004921000  |
| H | -5.508230000 | -1.930741000 | 0.419181000  |
| C | -5.615936000 | -0.883118000 | 0.144353000  |
| C | -4.483421000 | -0.106533000 | -0.062659000 |
| H | -3.482889000 | -0.527436000 | 0.043735000  |
| H | 0.050938000  | 1.818224000  | -0.038144000 |
| C | 0.022502000  | 2.843978000  | -0.403495000 |
| C | -1.200618000 | 3.412248000  | -0.802385000 |
| C | -1.217052000 | 4.729243000  | -1.298297000 |
| H | -2.162509000 | 5.165926000  | -1.607739000 |
| C | -0.038543000 | 5.455850000  | -1.392453000 |
| H | -0.061981000 | 6.471256000  | -1.778984000 |
| C | 1.169765000  | 4.886883000  | -0.990216000 |
| H | 2.090612000  | 5.460103000  | -1.062934000 |
| C | 1.193990000  | 3.584264000  | -0.495881000 |
| H | 2.122594000  | 3.116389000  | -0.181969000 |

### TSIA1

Imaginary Frequency: -181.06

**M06-L/BSI SCF energy in gas:** -2412.056635 a.u.

**M06/BSII SCF energy in benzene:** -2411.51424835 a.u.

**M06/BSII//M06-L/BSI free energy in benzene:** -2410.808063 a.u.

**M06/BSII//M06-L/BSI entalphy in benzene:** -2410.677707 a.u.

|    |              |              |              |
|----|--------------|--------------|--------------|
| Pd | -0.015563000 | -0.798404000 | -0.023504000 |
| O  | 2.626475000  | 0.421767000  | 1.027521000  |
| C  | 4.063449000  | 0.264807000  | 0.954465000  |

|   |              |              |              |
|---|--------------|--------------|--------------|
| C | 4.473779000  | -0.660184000 | 2.092013000  |
| H | 4.137415000  | -0.233344000 | 3.041165000  |
| H | 5.559478000  | -0.791551000 | 2.143353000  |
| H | 4.012790000  | -1.648073000 | 1.986223000  |
| C | 4.700080000  | 1.630136000  | 1.127803000  |
| H | 4.288847000  | 2.351603000  | 0.418476000  |
| H | 4.506574000  | 2.006168000  | 2.136156000  |
| H | 5.786273000  | 1.581776000  | 0.989547000  |
| H | 5.277233000  | -2.192050000 | 0.142554000  |
| C | 5.401766000  | -1.360921000 | -0.555377000 |
| H | 6.360721000  | -0.874483000 | -0.343894000 |
| H | 5.452457000  | -1.773573000 | -1.566886000 |
| C | 4.258697000  | -0.372146000 | -0.454215000 |
| C | 4.346316000  | 0.669169000  | -1.561602000 |
| H | 3.511222000  | 1.373319000  | -1.493116000 |
| H | 4.288488000  | 0.170834000  | -2.533702000 |
| H | 5.283151000  | 1.234529000  | -1.523284000 |
| O | 3.008229000  | -1.080418000 | -0.651476000 |
| B | 2.031840000  | -0.439699000 | 0.114949000  |
| C | -2.126437000 | -0.322626000 | 0.358283000  |
| C | -1.384566000 | 0.652880000  | 0.812383000  |
| C | -1.365623000 | 1.655150000  | 1.866140000  |
| C | -2.564272000 | 2.211016000  | 2.346338000  |
| C | -0.150551000 | 2.089450000  | 2.421016000  |
| H | -3.509505000 | 1.872033000  | 1.928588000  |

|   |              |              |              |
|---|--------------|--------------|--------------|
| H | 0.776206000  | 1.665461000  | 2.039850000  |
| C | -2.546861000 | 3.175043000  | 3.347095000  |
| C | -0.141818000 | 3.048321000  | 3.426136000  |
| H | -3.483094000 | 3.595110000  | 3.705897000  |
| H | 0.805960000  | 3.374684000  | 3.847278000  |
| C | -1.335456000 | 3.600636000  | 3.889570000  |
| H | -1.322498000 | 4.357684000  | 4.669296000  |
| C | -3.422940000 | -0.883369000 | 0.176510000  |
| C | -4.581423000 | -0.077645000 | 0.114832000  |
| C | -3.580954000 | -2.276311000 | 0.013696000  |
| H | -4.474289000 | 1.001116000  | 0.197899000  |
| H | -2.681387000 | -2.891365000 | 0.012433000  |
| C | -5.833842000 | -0.645812000 | -0.072636000 |
| C | -4.837401000 | -2.841085000 | -0.147407000 |
| H | -6.712012000 | -0.007247000 | -0.121410000 |
| H | -4.936532000 | -3.918091000 | -0.255761000 |
| C | -5.971224000 | -2.028728000 | -0.193005000 |
| H | -6.953672000 | -2.469738000 | -0.335059000 |
| B | -0.186943000 | 1.150717000  | -0.739991000 |
| O | -0.923631000 | 1.316143000  | -1.920513000 |
| O | 0.528234000  | 2.300470000  | -0.441660000 |
| C | 0.279353000  | 3.276667000  | -1.477057000 |
| C | -1.021473000 | 2.737542000  | -2.154481000 |
| H | -2.241262000 | 3.054898000  | -0.382824000 |
| C | -2.290736000 | 3.221825000  | -1.463990000 |



|   |              |              |              |
|---|--------------|--------------|--------------|
| H | -2.470476000 | 4.287309000  | -1.640131000 |
| H | -3.144202000 | 2.658985000  | -1.852986000 |
| H | -0.281777000 | 2.507912000  | -4.184383000 |
| C | -1.111046000 | 2.975981000  | -3.648968000 |
| H | -1.108418000 | 4.047317000  | -3.878270000 |
| H | -2.042729000 | 2.554048000  | -4.036874000 |
| H | 1.608988000  | 2.279581000  | -2.875046000 |
| C | 1.483739000  | 3.262000000  | -2.407565000 |
| H | 2.386556000  | 3.478060000  | -1.828804000 |
| H | 1.398002000  | 4.014628000  | -3.197941000 |
| H | 1.081246000  | 4.931965000  | -0.360781000 |
| C | 0.131474000  | 4.632659000  | -0.812859000 |
| H | -0.619311000 | 4.601067000  | -0.019467000 |
| H | -0.154416000 | 5.401227000  | -1.539968000 |
| P | -0.019318000 | -1.878075000 | -2.134837000 |
| C | 0.516497000  | -3.629908000 | -2.235550000 |
| H | -0.137065000 | -4.247035000 | -1.610554000 |
| H | 0.491809000  | -4.016577000 | -3.260510000 |
| H | 1.004799000  | -1.594485000 | -4.355470000 |
| H | 1.535591000  | -3.713665000 | -1.847412000 |
| C | 1.053043000  | -1.084677000 | -3.386948000 |
| H | 0.716039000  | -0.050562000 | -3.505345000 |
| H | 2.082866000  | -1.075803000 | -3.022099000 |
| H | -1.966290000 | -0.879875000 | -3.135390000 |
| C | -1.620709000 | -1.911388000 | -3.024561000 |

|   |              |              |              |
|---|--------------|--------------|--------------|
| H | -2.371003000 | -2.449884000 | -2.439111000 |
| H | -1.531575000 | -2.376098000 | -4.013159000 |
| P | 0.373406000  | -2.500786000 | 1.708831000  |
| C | -0.960182000 | -3.616494000 | 2.312211000  |
| H | -1.257790000 | -4.305587000 | 1.516050000  |
| H | -0.647514000 | -4.201296000 | 3.184657000  |
| H | 1.163660000  | -2.426999000 | 4.049249000  |
| H | -1.837202000 | -3.020689000 | 2.580294000  |
| C | 0.877990000  | -1.701767000 | 3.278677000  |
| H | 1.710238000  | -1.021304000 | 3.078792000  |
| H | 0.046695000  | -1.094462000 | 3.648545000  |
| H | 2.599991000  | -3.181117000 | 1.019224000  |
| C | 1.733669000  | -3.704121000 | 1.435374000  |
| H | 1.419231000  | -4.447191000 | 0.697009000  |
| H | 2.023100000  | -4.225052000 | 2.354680000  |

## I8

**M06-L/BSI SCF energy in gas:** -2412.115261 a.u.

**M06/BSII SCF energy in benzene:** -2411.58287027 a.u.

**M06/BSII//M06-L/BSI free energy in benzene:** -2410.871916 a.u.

**M06/BSII//M06-L/BSI entalphy in benzene:** -2410.743673 a.u.

|    |             |              |              |
|----|-------------|--------------|--------------|
| Pd | 0.599198000 | 0.508166000  | 0.103949000  |
| O  | 3.358717000 | -0.948493000 | 0.017385000  |
| C  | 4.774477000 | -0.650481000 | -0.080474000 |
| C  | 5.095453000 | -0.490105000 | -1.560592000 |
| H  | 4.821611000 | -1.407043000 | -2.090565000 |

|   |              |              |              |
|---|--------------|--------------|--------------|
| H | 6.160729000  | -0.305277000 | -1.731186000 |
| H | 4.529171000  | 0.334967000  | -2.004938000 |
| C | 5.559539000  | -1.815239000 | 0.491436000  |
| H | 5.244706000  | -2.057857000 | 1.508301000  |
| H | 5.409424000  | -2.705064000 | -0.126110000 |
| H | 6.633011000  | -1.595486000 | 0.505527000  |
| H | 5.637872000  | 1.967068000  | -0.872397000 |
| C | 5.895166000  | 1.675771000  | 0.148397000  |
| H | 6.907377000  | 1.255686000  | 0.141000000  |
| H | 5.912618000  | 2.581621000  | 0.760196000  |
| C | 4.900012000  | 0.683812000  | 0.719750000  |
| C | 5.178839000  | 0.464125000  | 2.199880000  |
| H | 4.501872000  | -0.281416000 | 2.625283000  |
| H | 5.031126000  | 1.405006000  | 2.737399000  |
| H | 6.206188000  | 0.128398000  | 2.374512000  |
| O | 3.569929000  | 1.248801000  | 0.606594000  |
| B | 2.669565000  | 0.235962000  | 0.286631000  |
| C | -1.532862000 | 0.895371000  | -0.126335000 |
| C | -2.415293000 | -0.154813000 | -0.077690000 |
| C | -3.863117000 | -0.049094000 | 0.227236000  |
| C | -4.343765000 | 0.852405000  | 1.192978000  |
| C | -4.801356000 | -0.894233000 | -0.387532000 |
| H | -3.633039000 | 1.506107000  | 1.696145000  |
| H | -4.454958000 | -1.618434000 | -1.123304000 |
| C | -5.694828000 | 0.926442000  | 1.506104000  |

|   |              |              |              |
|---|--------------|--------------|--------------|
| C | -6.155544000 | -0.820708000 | -0.079754000 |
| H | -6.035709000 | 1.634079000  | 2.258086000  |
| H | -6.858724000 | -1.482667000 | -0.579845000 |
| C | -6.611533000 | 0.092827000  | 0.867489000  |
| H | -7.668509000 | 0.147714000  | 1.113651000  |
| C | -1.924861000 | 2.304014000  | -0.266586000 |
| C | -1.076119000 | 3.336337000  | 0.183019000  |
| C | -3.051053000 | 2.694442000  | -1.025004000 |
| H | -0.162532000 | 3.057383000  | 0.709072000  |
| H | -3.706618000 | 1.924568000  | -1.424586000 |
| C | -1.355641000 | 4.676229000  | -0.064239000 |
| C | -3.319615000 | 4.029915000  | -1.291230000 |
| H | -0.680413000 | 5.444345000  | 0.305903000  |
| H | -4.189545000 | 4.293045000  | -1.888324000 |
| C | -2.480829000 | 5.033169000  | -0.804448000 |
| H | -2.693243000 | 6.077917000  | -1.014762000 |
| B | -1.837476000 | -1.576091000 | -0.279477000 |
| O | -2.328161000 | -2.714565000 | 0.331808000  |
| O | -0.777151000 | -1.866276000 | -1.128869000 |
| C | -0.373526000 | -3.231002000 | -0.849975000 |
| C | -1.693824000 | -3.850845000 | -0.298150000 |
| H | -2.751138000 | -3.551284000 | -2.170134000 |
| C | -2.630388000 | -4.322414000 | -1.402692000 |
| H | -2.265306000 | -5.234138000 | -1.885848000 |
| H | -3.614729000 | -4.529357000 | -0.974647000 |

|   |              |              |              |
|---|--------------|--------------|--------------|
| H | -0.948776000 | -4.573436000 | 1.607069000  |
| C | -1.499880000 | -4.939256000 | 0.737603000  |
| H | -0.950416000 | -5.786756000 | 0.313289000  |
| H | -2.470086000 | -5.306016000 | 1.082836000  |
| H | 0.374147000  | -2.726349000 | 1.120835000  |
| C | 0.737939000  | -3.168723000 | 0.186825000  |
| H | 1.554741000  | -2.538473000 | -0.177716000 |
| H | 1.136479000  | -4.163957000 | 0.411394000  |
| H | 1.088306000  | -3.422604000 | -2.420675000 |
| C | 0.135757000  | -3.872047000 | -2.126092000 |
| H | -0.570546000 | -3.750358000 | -2.950578000 |
| H | 0.308998000  | -4.943534000 | -1.976794000 |
| P | 0.283311000  | 0.197868000  | 2.378535000  |
| C | -0.101906000 | 1.760675000  | 3.251762000  |
| H | -1.030406000 | 2.180146000  | 2.855147000  |
| H | -0.215628000 | 1.594467000  | 4.328405000  |
| H | 1.389130000  | -0.580410000 | 4.435007000  |
| H | 0.696482000  | 2.488017000  | 3.084408000  |
| C | 1.672536000  | -0.439522000 | 3.386552000  |
| H | 2.028841000  | -1.389924000 | 2.977973000  |
| H | 2.495203000  | 0.278552000  | 3.333664000  |
| H | -1.013876000 | -1.878001000 | 2.560823000  |
| C | -1.105387000 | -0.856981000 | 2.939415000  |
| H | -2.049570000 | -0.460325000 | 2.557634000  |
| H | -1.138566000 | -0.885130000 | 4.033532000  |

|   |              |              |              |
|---|--------------|--------------|--------------|
| P | 1.016329000  | 0.954796000  | -2.112831000 |
| C | -0.387666000 | 1.481335000  | -3.158579000 |
| H | -0.786871000 | 2.433022000  | -2.797855000 |
| H | -0.083588000 | 1.590253000  | -4.205212000 |
| H | 2.000106000  | -0.187817000 | -4.050514000 |
| H | -1.187401000 | 0.739546000  | -3.084088000 |
| C | 1.663744000  | -0.474032000 | -3.048360000 |
| H | 2.486753000  | -0.932015000 | -2.494152000 |
| H | 0.860114000  | -1.209947000 | -3.131315000 |
| H | 3.156932000  | 2.089381000  | -1.893636000 |
| C | 2.227049000  | 2.288743000  | -2.431503000 |
| H | 1.823508000  | 3.227015000  | -2.040684000 |
| H | 2.430829000  | 2.407397000  | -3.500818000 |

## I9

**M06-L/BSI SCF energy in gas:** -1950.98436 a.u.

**M06/BSII SCF energy in benzene:** -1950.489256 a.u.

**M06/BSII//M06-L/BSI free energy in benzene:** -1949.887233 a.u.

**M06/BSII//M06-L/BSI entalphy in benzene:** -1949.774168 a.u.

|    |              |              |              |
|----|--------------|--------------|--------------|
| Pd | 0.556857000  | -0.414628000 | 0.077827000  |
| O  | -1.444397000 | 1.585143000  | -1.048017000 |
| C  | -2.626844000 | 2.392255000  | -0.811116000 |
| C  | -3.792397000 | 1.644380000  | -1.443417000 |
| H  | -3.580094000 | 1.479935000  | -2.503176000 |
| H  | -4.731026000 | 2.200998000  | -1.356075000 |

|   |              |              |              |
|---|--------------|--------------|--------------|
| H | -3.918836000 | 0.660396000  | -0.984854000 |
| C | -2.458976000 | 3.743890000  | -1.473515000 |
| H | -1.577002000 | 4.271093000  | -1.108146000 |
| H | -2.357140000 | 3.616545000  | -2.555285000 |
| H | -3.338993000 | 4.370830000  | -1.291545000 |
| H | -4.685149000 | 1.598655000  | 0.998502000  |
| C | -4.095392000 | 2.459410000  | 1.321975000  |
| H | -4.621505000 | 3.370487000  | 1.016012000  |
| H | -4.051153000 | 2.447243000  | 2.414317000  |
| C | -2.693421000 | 2.433212000  | 0.746427000  |
| C | -1.847591000 | 3.543658000  | 1.349138000  |
| H | -0.842405000 | 3.551083000  | 0.920047000  |
| H | -1.755671000 | 3.383412000  | 2.426568000  |
| H | -2.298693000 | 4.527842000  | 1.185195000  |
| O | -2.070117000 | 1.172577000  | 1.116831000  |
| B | -1.271388000 | 0.771059000  | 0.059720000  |
| B | -1.463505000 | -1.143208000 | -0.036394000 |
| O | -1.982163000 | -1.907682000 | 1.002933000  |
| O | -2.159511000 | -1.377685000 | -1.218654000 |
| C | -3.229838000 | -2.484540000 | 0.549823000  |
| C | -3.043030000 | -2.502185000 | -0.998520000 |
| C | -2.309677000 | -3.739923000 | -1.498258000 |
| H | -1.396613000 | -3.914449000 | -0.919222000 |
| H | -2.019647000 | -3.588450000 | -2.541199000 |
| H | -2.606292000 | -4.539008000 | 0.942248000  |

|   |              |              |              |
|---|--------------|--------------|--------------|
| H | -2.932026000 | -4.638517000 | -1.438928000 |
| C | -3.417282000 | -3.849316000 | 1.183500000  |
| H | -3.462730000 | -3.751094000 | 2.271609000  |
| H | -4.356500000 | -4.302290000 | 0.847593000  |
| H | -5.031223000 | -3.093313000 | -1.610854000 |
| H | -4.086231000 | -2.276779000 | -2.866151000 |
| C | -4.313375000 | -2.286746000 | -1.796804000 |
| H | -4.791676000 | -1.337195000 | -1.546740000 |
| H | -5.330784000 | -1.930666000 | 0.751104000  |
| C | -4.338130000 | -1.547781000 | 1.008973000  |
| H | -4.279925000 | -1.428151000 | 2.093823000  |
| H | -4.216296000 | -0.555934000 | 0.566555000  |
| C | 2.507587000  | 0.402987000  | -0.166889000 |
| C | 1.722231000  | 1.395073000  | -0.048874000 |
| C | 1.541144000  | 2.819929000  | 0.026726000  |
| C | 1.896831000  | 3.502884000  | 1.203487000  |
| C | 1.054902000  | 3.559472000  | -1.062504000 |
| H | 2.262184000  | 2.930926000  | 2.052525000  |
| H | 0.749518000  | 3.031757000  | -1.960869000 |
| C | 1.774846000  | 4.884475000  | 1.283290000  |
| C | 0.954944000  | 4.943975000  | -0.979452000 |
| H | 2.049565000  | 5.395784000  | 2.202249000  |
| H | 0.587245000  | 5.504232000  | -1.835918000 |
| C | 1.306592000  | 5.612859000  | 0.191431000  |
| H | 1.215796000  | 6.693586000  | 0.252769000  |



|   |              |              |              |
|---|--------------|--------------|--------------|
| C | 3.826689000  | -0.128647000 | -0.378023000 |
| C | 4.084774000  | -1.013718000 | -1.438540000 |
| C | 4.884598000  | 0.215138000  | 0.481340000  |
| H | 3.269991000  | -1.268975000 | -2.112499000 |
| H | 4.693113000  | 0.901435000  | 1.302432000  |
| C | 5.355371000  | -1.543959000 | -1.626840000 |
| C | 6.150961000  | -0.325803000 | 0.292862000  |
| H | 5.537048000  | -2.223411000 | -2.455727000 |
| H | 6.956213000  | -0.054957000 | 0.970802000  |
| C | 6.392096000  | -1.210302000 | -0.757111000 |
| H | 7.382419000  | -1.633208000 | -0.898784000 |
| P | 1.323732000  | -2.626173000 | 0.620830000  |
| C | 0.276412000  | -3.748739000 | 1.621096000  |
| H | -0.567124000 | -4.110318000 | 1.032555000  |
| H | 0.866272000  | -4.604403000 | 1.966656000  |
| H | 3.091807000  | -3.606050000 | 2.002253000  |
| H | -0.139346000 | -3.215505000 | 2.477748000  |
| C | 2.813221000  | -2.592671000 | 1.694252000  |
| H | 3.657117000  | -2.138121000 | 1.172070000  |
| H | 2.608161000  | -1.996343000 | 2.587022000  |
| H | 2.733930000  | -3.344567000 | -1.225148000 |
| C | 1.876302000  | -3.773817000 | -0.701423000 |
| H | 1.074687000  | -3.926392000 | -1.428383000 |
| H | 2.170273000  | -4.743449000 | -0.285234000 |

**TSIA2**

Imaginary Frequency: -192.22

**M06-L/BSI SCF energy in gas: -1950.969619 a.u.**

**M06/BSII SCF energy in benzene: -1950.4728289 a.u.**

**M06/BSII//M06-L/BSI free energy in benzene: -1949.874199 a.u.**

**M06/BSII//M06-L/BSI entalphy in benzene: -1949.758606 a.u.**

|    |              |              |              |
|----|--------------|--------------|--------------|
| Pd | -0.357732000 | -0.986538000 | -0.300248000 |
| O  | -0.171603000 | 0.596411000  | 2.077203000  |
| C  | 0.730191000  | 1.454321000  | 2.826752000  |
| C  | 1.925277000  | 0.603603000  | 3.233316000  |
| H  | 1.574188000  | -0.252354000 | 3.816037000  |
| H  | 2.631657000  | 1.169242000  | 3.849818000  |
| H  | 2.449102000  | 0.217822000  | 2.352137000  |
| C  | -0.001518000 | 1.981552000  | 4.042956000  |
| H  | -0.937329000 | 2.473037000  | 3.769132000  |
| H  | -0.238146000 | 1.159848000  | 4.724305000  |
| H  | 0.621541000  | 2.699702000  | 4.587866000  |
| H  | 3.254635000  | 2.366679000  | 1.877839000  |
| C  | 2.477438000  | 3.134093000  | 1.922581000  |
| H  | 2.567147000  | 3.657475000  | 2.880689000  |
| H  | 2.665818000  | 3.857676000  | 1.124308000  |
| C  | 1.096180000  | 2.534128000  | 1.767079000  |
| C  | 0.040051000  | 3.621096000  | 1.638670000  |
| H  | -0.962424000 | 3.187210000  | 1.573015000  |
| H  | 0.213858000  | 4.188141000  | 0.719818000  |
| H  | 0.066397000  | 4.311629000  | 2.487633000  |

|   |              |              |              |
|---|--------------|--------------|--------------|
| O | 1.064611000  | 1.763550000  | 0.535726000  |
| B | 0.188407000  | 0.717219000  | 0.741671000  |
| B | 1.696157000  | -0.749784000 | -0.604078000 |
| O | 2.157382000  | -0.251231000 | -1.810360000 |
| O | 2.751362000  | -1.095861000 | 0.232023000  |
| C | 3.582348000  | -0.003849000 | -1.690066000 |
| C | 3.991555000  | -0.943882000 | -0.510796000 |
| C | 4.404418000  | -2.333360000 | -0.974952000 |
| H | 3.666181000  | -2.755476000 | -1.663483000 |
| H | 4.483067000  | -2.996361000 | -0.108083000 |
| H | 4.021616000  | -1.342274000 | -3.349654000 |
| H | 5.373619000  | -2.320716000 | -1.483880000 |
| C | 4.243829000  | -0.326861000 | -3.016007000 |
| H | 3.886104000  | 0.363696000  | -3.784117000 |
| H | 5.331631000  | -0.215314000 | -2.945342000 |
| H | 5.978123000  | -0.181916000 | -0.102149000 |
| H | 5.243228000  | -1.082868000 | 1.232991000  |
| C | 5.037641000  | -0.373196000 | 0.426477000  |
| H | 4.701726000  | 0.562585000  | 0.879237000  |
| H | 4.809207000  | 1.755274000  | -1.308140000 |
| C | 3.752381000  | 1.474825000  | -1.370421000 |
| H | 3.287322000  | 2.066652000  | -2.164406000 |
| H | 3.254021000  | 1.737172000  | -0.434903000 |
| C | -2.366791000 | -0.230241000 | -0.293792000 |
| C | -1.522073000 | 0.762720000  | -0.427668000 |

|   |              |              |              |
|---|--------------|--------------|--------------|
| C | -1.468202000 | 2.062793000  | -1.089910000 |
| C | -0.371638000 | 2.400677000  | -1.898279000 |
| C | -2.525208000 | 2.976215000  | -0.963679000 |
| H | 0.447406000  | 1.689932000  | -1.990276000 |
| H | -3.378536000 | 2.718381000  | -0.341007000 |
| C | -0.340268000 | 3.617454000  | -2.565485000 |
| C | -2.482683000 | 4.197549000  | -1.627557000 |
| H | 0.512178000  | 3.862230000  | -3.194528000 |
| H | -3.307210000 | 4.897372000  | -1.517789000 |
| C | -1.390686000 | 4.524885000  | -2.428596000 |
| H | -1.359907000 | 5.480496000  | -2.945252000 |
| C | -3.758449000 | -0.562228000 | -0.261340000 |
| C | -4.244756000 | -1.713378000 | -0.911073000 |
| C | -4.678499000 | 0.236377000  | 0.448944000  |
| H | -3.536386000 | -2.340744000 | -1.447828000 |
| H | -4.310000000 | 1.109189000  | 0.982790000  |
| C | -5.596248000 | -2.026161000 | -0.888647000 |
| C | -6.024996000 | -0.099639000 | 0.494146000  |
| H | -5.953749000 | -2.907429000 | -1.415128000 |
| H | -6.715896000 | 0.524628000  | 1.055021000  |
| C | -6.493260000 | -1.225398000 | -0.181197000 |
| H | -7.548386000 | -1.481902000 | -0.151205000 |
| P | -0.100351000 | -3.198980000 | 0.323674000  |
| C | 1.079969000  | -4.287239000 | -0.553301000 |
| H | 2.068409000  | -3.822623000 | -0.523403000 |

|   |              |              |              |
|---|--------------|--------------|--------------|
| H | 1.137865000  | -5.275323000 | -0.085048000 |
| H | -1.305335000 | -5.233375000 | 0.999480000  |
| H | 0.789620000  | -4.406589000 | -1.599635000 |
| C | -1.561174000 | -4.293711000 | 0.497488000  |
| H | -2.338362000 | -3.780495000 | 1.069159000  |
| H | -1.974181000 | -4.523769000 | -0.488010000 |
| H | -0.077529000 | -2.642146000 | 2.682171000  |
| C | 0.590399000  | -3.194446000 | 2.016808000  |
| H | 1.550225000  | -2.670780000 | 1.994832000  |
| H | 0.730179000  | -4.210489000 | 2.401894000  |

## I10

**M06-L/BSI SCF energy in gas:** -1950.969619 a.u.

**M06/BSII SCF energy in benzene:** -1950.4728289 a.u.

**M06/BSII//M06-L/BSI free energy in benzene:** -1949.874199 a.u.

**M06/BSII//M06-L/BSI entalphy in benzene:** -1949.758606 a.u.

|    |              |              |              |
|----|--------------|--------------|--------------|
| Pd | -0.285413000 | 1.109740000  | -0.250267000 |
| O  | 0.120498000  | -0.518025000 | -2.821458000 |
| C  | 1.500222000  | -0.715744000 | -3.206413000 |
| C  | 2.261689000  | 0.536818000  | -2.790073000 |
| H  | 1.773779000  | 1.408499000  | -3.238973000 |
| H  | 3.304072000  | 0.510855000  | -3.125774000 |
| H  | 2.248983000  | 0.655104000  | -1.700512000 |
| C  | 1.562771000  | -0.904094000 | -4.708577000 |
| H  | 0.903473000  | -1.708007000 | -5.041724000 |

|   |              |              |              |
|---|--------------|--------------|--------------|
| H | 1.253962000  | 0.015088000  | -5.213522000 |
| H | 2.584137000  | -1.137639000 | -5.028942000 |
| H | 3.560511000  | -1.125732000 | -1.265512000 |
| C | 3.350797000  | -1.981155000 | -1.912127000 |
| H | 4.034094000  | -1.957491000 | -2.768406000 |
| H | 3.557932000  | -2.893935000 | -1.345062000 |
| C | 1.906860000  | -1.973586000 | -2.371720000 |
| C | 1.545350000  | -3.282343000 | -3.059968000 |
| H | 0.505567000  | -3.271598000 | -3.401811000 |
| H | 1.659001000  | -4.105208000 | -2.348994000 |
| H | 2.189112000  | -3.481930000 | -3.922338000 |
| O | 1.055824000  | -1.863914000 | -1.207823000 |
| B | -0.019954000 | -1.067185000 | -1.559477000 |
| B | 1.214668000  | 0.650721000  | 1.075638000  |
| O | 0.911502000  | 0.340347000  | 2.384963000  |
| O | 2.535968000  | 0.377754000  | 0.763237000  |
| C | 1.980654000  | -0.533072000 | 2.852852000  |
| C | 3.188005000  | -0.047649000 | 1.997940000  |
| C | 3.875338000  | 1.179340000  | 2.578402000  |
| H | 3.145941000  | 1.955392000  | 2.832858000  |
| H | 4.568971000  | 1.591090000  | 1.839692000  |
| H | 2.290388000  | 0.706336000  | 4.607262000  |
| H | 4.445773000  | 0.937363000  | 3.480634000  |
| C | 2.140940000  | -0.343583000 | 4.346020000  |
| H | 1.245876000  | -0.697051000 | 4.864243000  |

|   |              |              |              |
|---|--------------|--------------|--------------|
| H | 2.994798000  | -0.918800000 | 4.721052000  |
| H | 4.645228000  | -1.530419000 | 2.581643000  |
| H | 5.006974000  | -0.711615000 | 1.055501000  |
| C | 4.198939000  | -1.124473000 | 1.666955000  |
| H | 3.738726000  | -1.944478000 | 1.112691000  |
| H | 2.290764000  | -2.685885000 | 2.902826000  |
| C | 1.564779000  | -1.959928000 | 2.522100000  |
| H | 0.593670000  | -2.170908000 | 2.977906000  |
| H | 1.459246000  | -2.103664000 | 1.440861000  |
| C | -2.067327000 | 0.243962000  | -0.808474000 |
| C | -1.276884000 | -0.894962000 | -0.651323000 |
| C | -1.559918000 | -1.955579000 | 0.359012000  |
| C | -2.045741000 | -1.626993000 | 1.633610000  |
| C | -1.347840000 | -3.309617000 | 0.066440000  |
| H | -2.184173000 | -0.577767000 | 1.887027000  |
| H | -0.960132000 | -3.587098000 | -0.911341000 |
| C | -2.322265000 | -2.613384000 | 2.572510000  |
| C | -1.622513000 | -4.299206000 | 1.005585000  |
| H | -2.692618000 | -2.331761000 | 3.555318000  |
| H | -1.451767000 | -5.343039000 | 0.753637000  |
| C | -2.112124000 | -3.956401000 | 2.262982000  |
| H | -2.321955000 | -4.728268000 | 2.998757000  |
| C | -3.449766000 | 0.410275000  | -0.432222000 |
| C | -3.906722000 | 1.654987000  | 0.045035000  |
| C | -4.398921000 | -0.620909000 | -0.597729000 |

|   |              |              |              |
|---|--------------|--------------|--------------|
| H | -3.177753000 | 2.459256000  | 0.144351000  |
| H | -4.060885000 | -1.587039000 | -0.965357000 |
| C | -5.237037000 | 1.848592000  | 0.386439000  |
| C | -5.737384000 | -0.411278000 | -0.298702000 |
| H | -5.565480000 | 2.810505000  | 0.771989000  |
| H | -6.456053000 | -1.214086000 | -0.442692000 |
| C | -6.161261000 | 0.818875000  | 0.205590000  |
| H | -7.208686000 | 0.977349000  | 0.448129000  |
| P | 0.482921000  | 3.224532000  | -0.158995000 |
| C | 2.255599000  | 3.523168000  | -0.491301000 |
| H | 2.492178000  | 3.230142000  | -1.517177000 |
| H | 2.509200000  | 4.579794000  | -0.356952000 |
| H | 0.596816000  | 5.056164000  | 1.463894000  |
| H | 2.861885000  | 2.906216000  | 0.175827000  |
| C | 0.238419000  | 4.021679000  | 1.468043000  |
| H | -0.823659000 | 4.013205000  | 1.724209000  |
| H | 0.767376000  | 3.455832000  | 2.238731000  |
| H | -1.391760000 | 4.432898000  | -1.120594000 |
| C | -0.314965000 | 4.413559000  | -1.303834000 |
| H | -0.161427000 | 4.080763000  | -2.333250000 |
| H | 0.091060000  | 5.424792000  | -1.187389000 |

## I11

**M06-L/BSI SCF energy in gas:** -1951.002073 a.u.

**M06/BSII SCF energy in benzene:** -1950.50340909 a.u.

**M06/BSII//M06-L/BSI free energy in benzene:** -1949.896962 a.u.



**M06/BSII//M06-L/BSI entalphy in benzene: -1949.785702 a.u.**

|    |              |              |              |
|----|--------------|--------------|--------------|
| Pd | 0.450711000  | -0.455871000 | 0.077682000  |
| B  | 2.533285000  | -0.277960000 | -0.049585000 |
| B  | -1.455588000 | 1.889180000  | 0.044317000  |
| O  | 3.299196000  | -0.940215000 | -1.004495000 |
| O  | 3.331824000  | 0.564638000  | 0.713330000  |
| O  | -0.072986000 | 1.727710000  | -0.183256000 |
| O  | -1.759542000 | 3.191522000  | 0.335673000  |
| C  | -1.735127000 | -0.535811000 | -0.044379000 |
| C  | -2.378574000 | 0.676776000  | -0.065151000 |
| C  | 4.600488000  | -0.299819000 | -1.072306000 |
| C  | 4.722037000  | 0.387458000  | 0.325291000  |
| C  | 0.582181000  | 2.952867000  | 0.290156000  |
| C  | -0.569792000 | 3.987545000  | 0.114079000  |
| C  | -3.842530000 | 0.868490000  | -0.227705000 |
| C  | -4.584988000 | 0.135212000  | -1.167146000 |
| C  | -4.528928000 | 1.818094000  | 0.545242000  |
| H  | -4.073892000 | -0.591607000 | -1.793097000 |
| H  | -3.973850000 | 2.411239000  | 1.267637000  |
| C  | -5.953475000 | 0.327192000  | -1.313039000 |
| C  | -5.900462000 | 2.006008000  | 0.405284000  |
| H  | -6.501222000 | -0.252693000 | -2.052030000 |
| H  | -6.407991000 | 2.741880000  | 1.024786000  |
| C  | -6.621502000 | 1.260398000  | -0.523644000 |
| H  | -7.692206000 | 1.409381000  | -0.636104000 |

|   |              |              |              |
|---|--------------|--------------|--------------|
| C | -2.484286000 | -1.794398000 | -0.070064000 |
| C | -2.245648000 | -2.764349000 | -1.058708000 |
| C | -3.412373000 | -2.111182000 | 0.939854000  |
| H | -1.549431000 | -2.521577000 | -1.860867000 |
| H | -3.626562000 | -1.363828000 | 1.700978000  |
| C | -2.898511000 | -3.992131000 | -1.040360000 |
| C | -4.043408000 | -3.349036000 | 0.974505000  |
| H | -2.706509000 | -4.716725000 | -1.829096000 |
| H | -4.747508000 | -3.570653000 | 1.773210000  |
| C | -3.790285000 | -4.300008000 | -0.013017000 |
| H | -4.288916000 | -5.265086000 | 0.011341000  |
| C | 1.799016000  | 3.229826000  | -0.563327000 |
| H | 2.568850000  | 2.485474000  | -0.353562000 |
| H | 1.559275000  | 3.204751000  | -1.628568000 |
| H | 2.208625000  | 4.217625000  | -0.324133000 |
| C | 0.966356000  | 2.717072000  | 1.739880000  |
| H | 0.080827000  | 2.537609000  | 2.357843000  |
| H | 1.620120000  | 1.841893000  | 1.796882000  |
| H | 1.507133000  | 3.575132000  | 2.151379000  |
| C | -0.663355000 | 4.536428000  | -1.302425000 |
| H | -0.654286000 | 3.730378000  | -2.041693000 |
| H | -1.602424000 | 5.083911000  | -1.411787000 |
| H | 0.161566000  | 5.219392000  | -1.526427000 |
| C | -0.550724000 | 5.116772000  | 1.123877000  |
| H | -1.388820000 | 5.793758000  | 0.940035000  |

|   |              |              |              |
|---|--------------|--------------|--------------|
| H | -0.634888000 | 4.743293000  | 2.146071000  |
| H | 0.375201000  | 5.695985000  | 1.040767000  |
| C | 5.393145000  | 1.748072000  | 0.307352000  |
| H | 6.430676000  | 1.666094000  | -0.035182000 |
| H | 4.873823000  | 2.454658000  | -0.343275000 |
| H | 5.406083000  | 2.168835000  | 1.316597000  |
| C | 5.376335000  | -0.488753000 | 1.383158000  |
| H | 5.253568000  | -0.020469000 | 2.363051000  |
| H | 4.919005000  | -1.479694000 | 1.429015000  |
| H | 6.447400000  | -0.615102000 | 1.195952000  |
| C | 4.538503000  | 0.691936000  | -2.226205000 |
| H | 5.497369000  | 1.196394000  | -2.382064000 |
| H | 4.277385000  | 0.158588000  | -3.143509000 |
| H | 3.771336000  | 1.453581000  | -2.056136000 |
| C | 5.647957000  | -1.360145000 | -1.349286000 |
| H | 5.618813000  | -2.162403000 | -0.608192000 |
| H | 5.479910000  | -1.803866000 | -2.334154000 |
| H | 6.654039000  | -0.926290000 | -1.344200000 |
| P | 0.961036000  | -2.575131000 | 0.521899000  |
| C | 2.513833000  | -2.947074000 | 1.424183000  |
| H | 2.589259000  | -2.341340000 | 2.330645000  |
| H | 2.548300000  | -4.007061000 | 1.696744000  |
| H | 1.520187000  | -4.612716000 | -0.681846000 |
| H | 3.361930000  | -2.716514000 | 0.776625000  |
| C | 1.207136000  | -3.603116000 | -0.968211000 |

|   |              |              |              |
|---|--------------|--------------|--------------|
| H | 0.280312000  | -3.669379000 | -1.540409000 |
| H | 1.980434000  | -3.141306000 | -1.586354000 |
| H | -1.139363000 | -2.938650000 | 1.748166000  |
| C | -0.243005000 | -3.522695000 | 1.542653000  |
| H | 0.224679000  | -3.796604000 | 2.491430000  |
| H | -0.553023000 | -4.434389000 | 1.024767000  |

## I12

**M06-L/BSI SCF energy in gas:** -1951.018427 a.u.

**M06/BSII SCF energy in benzene:** -1950.52071352 a.u.

**M06/BSII//M06-L/BSI free energy in benzene:** -1949.918322 a.u.

**M06/BSII//M06-L/BSI entalphy in benzene:** -1949.803991 a.u.

|    |              |              |              |
|----|--------------|--------------|--------------|
| Pd | -0.299682000 | -0.926026000 | -0.343517000 |
| B  | -2.077387000 | -0.135760000 | 0.131841000  |
| B  | 2.616312000  | -0.332923000 | 0.083674000  |
| O  | -2.278620000 | 0.726909000  | 1.181482000  |
| O  | -3.269856000 | -0.499720000 | -0.478539000 |
| O  | 2.066471000  | -1.535345000 | -0.388248000 |
| O  | 3.822759000  | -0.540768000 | 0.704936000  |
| C  | 0.538574000  | 0.979637000  | -0.286376000 |
| C  | 1.899772000  | 1.008899000  | -0.107856000 |
| C  | -3.702250000 | 0.852528000  | 1.412715000  |
| C  | -4.335618000 | 0.315501000  | 0.080870000  |
| C  | 2.825046000  | -2.611631000 | 0.239591000  |
| C  | 4.199600000  | -1.919766000 | 0.491438000  |
| C  | 2.723395000  | 2.249149000  | -0.123009000 |

|   |              |              |              |
|---|--------------|--------------|--------------|
| C | 2.586833000  | 3.210593000  | -1.136522000 |
| C | 3.693198000  | 2.474978000  | 0.865455000  |
| H | 1.847568000  | 3.051494000  | -1.917775000 |
| H | 3.825811000  | 1.738388000  | 1.652798000  |
| C | 3.375502000  | 4.354662000  | -1.153223000 |
| C | 4.478626000  | 3.623501000  | 0.853255000  |
| H | 3.249814000  | 5.082088000  | -1.951454000 |
| H | 5.216508000  | 3.778122000  | 1.636928000  |
| C | 4.324892000  | 4.569869000  | -0.156003000 |
| H | 4.941012000  | 5.464988000  | -0.168585000 |
| C | -0.230801000 | 2.231926000  | -0.393376000 |
| C | -1.104713000 | 2.462910000  | -1.465012000 |
| C | -0.119443000 | 3.229628000  | 0.589145000  |
| H | -1.226571000 | 1.683422000  | -2.217107000 |
| H | 0.548230000  | 3.061575000  | 1.430644000  |
| C | -1.800158000 | 3.664141000  | -1.577532000 |
| C | -0.842547000 | 4.411437000  | 0.498312000  |
| H | -2.453113000 | 3.829263000  | -2.432121000 |
| H | -0.745111000 | 5.162953000  | 1.278012000  |
| C | -1.678511000 | 4.643478000  | -0.593149000 |
| H | -2.233230000 | 5.574659000  | -0.673752000 |
| C | 2.903352000  | -3.792094000 | -0.703215000 |
| H | 1.924383000  | -4.258994000 | -0.818886000 |
| H | 3.257833000  | -3.493045000 | -1.691164000 |
| H | 3.587872000  | -4.549378000 | -0.305988000 |

|   |              |              |              |
|---|--------------|--------------|--------------|
| C | 2.095867000  | -2.973913000 | 1.523854000  |
| H | 2.071699000  | -2.125974000 | 2.215085000  |
| H | 1.057798000  | -3.232863000 | 1.287504000  |
| H | 2.560221000  | -3.825591000 | 2.030487000  |
| C | 5.109354000  | -1.946431000 | -0.728519000 |
| H | 4.578890000  | -1.613570000 | -1.625188000 |
| H | 5.946873000  | -1.265337000 | -0.561460000 |
| H | 5.511760000  | -2.946752000 | -0.914879000 |
| C | 4.936203000  | -2.418020000 | 1.718315000  |
| H | 5.881706000  | -1.880948000 | 1.828383000  |
| H | 4.353526000  | -2.263590000 | 2.628571000  |
| H | 5.164590000  | -3.485622000 | 1.628322000  |
| C | -4.638591000 | 1.405506000  | -0.933936000 |
| H | -5.463145000 | 2.045595000  | -0.604132000 |
| H | -3.763252000 | 2.034931000  | -1.110136000 |
| H | -4.923387000 | 0.942945000  | -1.883127000 |
| C | -5.555182000 | -0.567747000 | 0.268471000  |
| H | -5.903148000 | -0.931164000 | -0.702844000 |
| H | -5.344570000 | -1.435722000 | 0.898317000  |
| H | -6.375863000 | -0.006508000 | 0.728271000  |
| C | -4.004296000 | 2.309396000  | 1.707220000  |
| H | -5.079189000 | 2.464470000  | 1.853978000  |
| H | -3.488728000 | 2.614721000  | 2.621705000  |
| H | -3.660519000 | 2.960674000  | 0.900486000  |
| C | -4.021675000 | -0.009303000 | 2.626413000  |

|   |              |              |              |
|---|--------------|--------------|--------------|
| H | -3.764188000 | -1.058604000 | 2.449907000  |
| H | -3.428528000 | 0.337056000  | 3.476224000  |
| H | -5.080267000 | 0.044352000  | 2.899855000  |
| P | -1.486218000 | -2.965156000 | -0.601684000 |
| C | -2.600820000 | -3.423423000 | 0.781740000  |
| H | -3.325502000 | -2.618366000 | 0.922677000  |
| H | -3.137214000 | -4.355355000 | 0.575014000  |
| H | -1.394512000 | -5.376692000 | -1.016567000 |
| H | -2.027428000 | -3.538803000 | 1.705727000  |
| C | -0.652843000 | -4.584966000 | -0.866260000 |
| H | -0.011007000 | -4.539801000 | -1.749166000 |
| H | -0.035667000 | -4.851612000 | -0.004178000 |
| H | -2.561353000 | -1.996159000 | -2.572072000 |
| C | -2.633404000 | -2.948405000 | -2.047223000 |
| H | -3.666632000 | -3.063330000 | -1.711424000 |
| H | -2.392154000 | -3.760807000 | -2.737980000 |

### I13

**M06-L/BSI SCF energy in gas:** -2412.122988 a.u.

**M06/BSII SCF energy in benzene:** -2411.587004 a.u.

**M06/BSII//M06-L/BSI free energy in benzene:** -2410.877515 a.u.

**M06/BSII//M06-L/BSI entalphy in benzene:** -2410.747082 a.u.

|    |              |              |              |
|----|--------------|--------------|--------------|
| Pd | -1.302386000 | 0.683590000  | -0.164695000 |
| B  | -0.907191000 | -0.281799000 | 1.622002000  |
| B  | 1.155167000  | -1.347489000 | -0.928043000 |

|   |              |              |              |
|---|--------------|--------------|--------------|
| O | -0.775549000 | 0.284464000  | 2.877042000  |
| O | -0.647671000 | -1.644756000 | 1.656671000  |
| O | -0.006009000 | -1.441384000 | -1.680609000 |
| O | 1.834474000  | -2.549586000 | -0.887568000 |
| C | 0.790693000  | 0.959057000  | 0.009561000  |
| C | 1.681940000  | -0.024066000 | -0.324362000 |
| C | -0.507394000 | -0.774551000 | 3.834022000  |
| C | -0.002978000 | -1.939796000 | 2.925293000  |
| C | -0.227791000 | -2.838586000 | -1.976184000 |
| C | 1.212229000  | -3.432808000 | -1.846826000 |
| C | 3.151170000  | 0.110077000  | -0.161494000 |
| C | 4.021165000  | -0.308777000 | -1.180355000 |
| C | 3.725844000  | 0.640472000  | 1.004692000  |
| H | 3.598378000  | -0.729136000 | -2.092115000 |
| H | 3.070775000  | 0.967568000  | 1.810646000  |
| C | 5.400334000  | -0.182708000 | -1.053124000 |
| C | 5.103918000  | 0.761297000  | 1.138756000  |
| H | 6.049154000  | -0.505862000 | -1.863871000 |
| H | 5.521048000  | 1.173707000  | 2.054228000  |
| C | 5.949628000  | 0.354157000  | 0.108584000  |
| H | 7.027102000  | 0.449402000  | 0.213076000  |
| C | 1.159133000  | 2.335390000  | 0.379818000  |
| C | 2.134192000  | 3.051611000  | -0.343257000 |
| C | 0.448185000  | 3.032766000  | 1.374981000  |
| H | 2.702405000  | 2.538028000  | -1.115871000 |



|   |              |              |              |
|---|--------------|--------------|--------------|
| H | -0.319499000 | 2.496323000  | 1.928926000  |
| C | 2.380562000  | 4.396215000  | -0.087308000 |
| C | 0.716314000  | 4.369051000  | 1.648370000  |
| H | 3.130758000  | 4.924698000  | -0.670873000 |
| H | 0.160612000  | 4.878098000  | 2.432343000  |
| C | 1.677211000  | 5.063094000  | 0.913851000  |
| H | 1.872944000  | 6.112723000  | 1.116400000  |
| C | -0.840491000 | -2.935154000 | -3.360560000 |
| H | -1.830252000 | -2.466695000 | -3.358222000 |
| H | -0.231907000 | -2.428244000 | -4.113059000 |
| H | -0.966062000 | -3.980160000 | -3.664390000 |
| C | -1.190907000 | -3.384017000 | -0.932777000 |
| H | -0.757239000 | -3.350064000 | 0.067788000  |
| H | -2.080691000 | -2.745797000 | -0.908022000 |
| H | -1.497517000 | -4.409207000 | -1.165819000 |
| C | 2.017116000  | -3.313481000 | -3.134937000 |
| H | 1.662370000  | -4.005370000 | -3.905517000 |
| H | 1.965063000  | -2.295769000 | -3.536676000 |
| H | 3.066156000  | -3.537398000 | -2.924890000 |
| C | 1.269998000  | -4.849913000 | -1.312556000 |
| H | 2.309281000  | -5.182963000 | -1.248679000 |
| H | 0.832782000  | -4.917865000 | -0.313877000 |
| H | 0.734185000  | -5.540075000 | -1.973575000 |
| C | -0.430684000 | -3.325331000 | 3.367880000  |
| H | -0.041020000 | -3.555526000 | 4.365717000  |

|   |              |              |              |
|---|--------------|--------------|--------------|
| H | -1.518116000 | -3.429591000 | 3.389183000  |
| H | -0.033734000 | -4.074539000 | 2.676220000  |
| C | 1.496756000  | -1.902772000 | 2.676525000  |
| H | 1.748748000  | -2.596257000 | 1.868314000  |
| H | 1.820439000  | -0.907811000 | 2.358710000  |
| H | 2.064016000  | -2.185097000 | 3.569452000  |
| C | -1.820046000 | -1.089024000 | 4.536904000  |
| H | -1.686904000 | -1.825897000 | 5.335586000  |
| H | -2.220225000 | -0.172760000 | 4.979749000  |
| H | -2.562265000 | -1.478953000 | 3.834624000  |
| C | 0.513699000  | -0.260333000 | 4.829937000  |
| H | 1.407484000  | 0.113292000  | 4.325498000  |
| H | 0.086705000  | 0.561041000  | 5.411834000  |
| H | 0.813153000  | -1.049354000 | 5.528931000  |
| P | -1.186766000 | 1.861616000  | -2.303388000 |
| P | -3.555713000 | 0.235061000  | 0.025014000  |
| C | -1.090500000 | 3.686726000  | -2.163341000 |
| H | -0.945423000 | 4.163709000  | -3.138792000 |
| H | -2.006455000 | 4.075676000  | -1.710045000 |
| H | -0.254989000 | 3.951580000  | -1.508433000 |
| C | 0.327982000  | 1.479623000  | -3.257513000 |
| H | 0.383636000  | 0.400048000  | -3.420436000 |
| H | 0.345621000  | 2.005815000  | -4.217784000 |
| H | 1.203874000  | 1.768269000  | -2.670587000 |
| C | -2.461979000 | 1.669261000  | -3.615803000 |

|   |              |              |              |
|---|--------------|--------------|--------------|
| H | -3.441203000 | 1.993820000  | -3.251160000 |
| H | -2.216377000 | 2.254877000  | -4.508457000 |
| H | -2.539220000 | 0.616478000  | -3.904036000 |
| C | -4.355999000 | -0.641430000 | -1.377767000 |
| H | -4.239910000 | -0.063017000 | -2.297375000 |
| H | -3.872732000 | -1.610118000 | -1.530869000 |
| H | -5.423388000 | -0.807123000 | -1.194743000 |
| C | -4.660132000 | 1.688224000  | 0.211913000  |
| H | -4.552491000 | 2.350829000  | -0.651131000 |
| H | -5.711037000 | 1.392515000  | 0.301542000  |
| H | -4.371678000 | 2.253216000  | 1.101211000  |
| C | -4.104943000 | -0.806284000 | 1.428418000  |
| H | -3.554018000 | -1.751973000 | 1.413746000  |
| H | -3.861553000 | -0.296927000 | 2.365298000  |
| H | -5.181072000 | -1.008868000 | 1.399715000  |

### TSRE1

Imaginary Frequency:

**M06-L/BSI SCF energy in gas:** -2412.126798 a.u.

**M06/BSII SCF energy in benzene:** -2411.587901a.u.

**M06/BSII//M06-L/BSI free energy in benzene:** -2410.875717 a.u.

**M06/BSII//M06-L/BSI entalphy in benzene:** -2410.748654 a.u.

|    |              |              |              |
|----|--------------|--------------|--------------|
| Pd | -1.494354000 | 0.300556000  | -0.321512000 |
| B  | -0.566191000 | -0.336810000 | 1.411184000  |
| B  | 1.546700000  | -1.043581000 | -0.785304000 |
| O  | -0.612155000 | 0.215008000  | 2.688989000  |

|   |              |              |              |
|---|--------------|--------------|--------------|
| O | -0.064349000 | -1.639336000 | 1.459304000  |
| O | 0.511792000  | -1.433695000 | -1.615430000 |
| O | 2.539983000  | -1.998691000 | -0.711158000 |
| C | 0.451302000  | 1.021354000  | 0.140555000  |
| C | 1.625826000  | 0.375134000  | -0.160491000 |
| C | -0.266605000 | -0.820556000 | 3.642063000  |
| C | 0.527810000  | -1.839265000 | 2.766979000  |
| C | 0.726386000  | -2.821412000 | -1.963680000 |
| C | 2.264108000  | -2.983245000 | -1.733353000 |
| C | 2.966771000  | 0.961353000  | 0.049542000  |
| C | 3.987222000  | 0.770174000  | -0.895933000 |
| C | 3.277949000  | 1.703813000  | 1.201611000  |
| H | 3.773104000  | 0.185797000  | -1.789306000 |
| H | 2.505486000  | 1.850884000  | 1.954932000  |
| C | 5.251309000  | 1.321209000  | -0.717168000 |
| C | 4.542719000  | 2.247578000  | 1.386616000  |
| H | 6.018553000  | 1.166853000  | -1.471859000 |
| H | 4.757351000  | 2.815550000  | 2.288441000  |
| C | 5.535973000  | 2.064768000  | 0.425247000  |
| H | 6.524491000  | 2.491988000  | 0.570003000  |
| C | 0.337107000  | 2.470228000  | 0.409438000  |
| C | 1.094940000  | 3.399038000  | -0.332387000 |
| C | -0.644377000 | 2.987378000  | 1.276852000  |
| H | 1.853633000  | 3.032305000  | -1.019965000 |
| H | -1.252495000 | 2.290362000  | 1.846130000  |

|   |              |              |              |
|---|--------------|--------------|--------------|
| C | 0.886902000  | 4.768168000  | -0.207479000 |
| C | -0.838537000 | 4.356974000  | 1.413370000  |
| H | 1.483284000  | 5.456176000  | -0.801862000 |
| H | -1.597853000 | 4.723909000  | 2.099862000  |
| C | -0.078057000 | 5.258190000  | 0.670677000  |
| H | -0.238374000 | 6.328455000  | 0.769951000  |
| C | 0.270015000  | -3.024859000 | -3.395887000 |
| H | -0.808948000 | -2.853650000 | -3.463398000 |
| H | 0.764427000  | -2.337247000 | -4.085859000 |
| H | 0.468873000  | -4.049182000 | -3.729534000 |
| C | -0.113288000 | -3.669308000 | -1.021348000 |
| H | 0.188678000  | -3.524307000 | 0.017611000  |
| H | -1.157109000 | -3.351580000 | -1.100720000 |
| H | -0.050559000 | -4.732287000 | -1.276722000 |
| C | 3.087954000  | -2.584049000 | -2.950744000 |
| H | 2.997733000  | -3.311164000 | -3.763824000 |
| H | 2.774115000  | -1.605080000 | -3.329521000 |
| H | 4.140656000  | -2.513028000 | -2.664719000 |
| C | 2.688126000  | -4.345691000 | -1.224325000 |
| H | 3.770247000  | -4.368743000 | -1.070489000 |
| H | 2.205751000  | -4.582317000 | -0.273363000 |
| H | 2.432656000  | -5.129406000 | -1.945971000 |
| C | 0.339922000  | -3.293420000 | 3.154736000  |
| H | 0.674528000  | -3.472848000 | 4.182535000  |
| H | -0.704574000 | -3.604708000 | 3.072276000  |

|   |              |              |              |
|---|--------------|--------------|--------------|
| H | 0.935604000  | -3.933650000 | 2.496943000  |
| C | 2.008388000  | -1.509241000 | 2.660515000  |
| H | 2.460416000  | -2.116330000 | 1.870640000  |
| H | 2.166818000  | -0.461064000 | 2.392646000  |
| H | 2.533951000  | -1.708987000 | 3.600022000  |
| C | -1.573656000 | -1.390830000 | 4.176399000  |
| H | -1.404149000 | -2.146019000 | 4.950378000  |
| H | -2.168573000 | -0.583584000 | 4.613474000  |
| H | -2.161489000 | -1.848998000 | 3.373878000  |
| C | 0.532131000  | -0.192855000 | 4.766839000  |
| H | 1.401095000  | 0.347241000  | 4.385654000  |
| H | -0.090759000 | 0.515139000  | 5.320438000  |
| H | 0.880818000  | -0.956913000 | 5.470656000  |
| P | -1.616221000 | 1.371365000  | -2.494085000 |
| P | -3.508079000 | -0.647932000 | 0.233172000  |
| C | -1.992269000 | 3.166381000  | -2.441764000 |
| H | -1.942227000 | 3.623880000  | -3.436086000 |
| H | -2.990702000 | 3.327158000  | -2.026168000 |
| H | -1.272929000 | 3.663084000  | -1.783139000 |
| C | -0.002321000 | 1.368862000  | -3.363862000 |
| H | 0.285395000  | 0.338713000  | -3.588429000 |
| H | -0.031273000 | 1.955409000  | -4.288473000 |
| H | 0.759990000  | 1.782586000  | -2.695926000 |
| C | -2.736180000 | 0.808412000  | -3.839639000 |
| H | -3.778344000 | 0.900725000  | -3.521738000 |

|   |              |              |              |
|---|--------------|--------------|--------------|
| H | -2.597975000 | 1.388493000  | -4.758967000 |
| H | -2.546234000 | -0.246019000 | -4.059377000 |
| C | -4.982512000 | -0.585627000 | -0.867075000 |
| H | -5.862379000 | -1.047112000 | -0.404374000 |
| H | -5.218491000 | 0.455218000  | -1.106711000 |
| H | -4.765982000 | -1.104558000 | -1.805065000 |
| C | -4.205312000 | 0.074507000  | 1.768116000  |
| H | -4.435154000 | 1.130012000  | 1.599788000  |
| H | -5.115799000 | -0.441164000 | 2.093550000  |
| H | -3.452705000 | 0.026945000  | 2.559464000  |
| C | -3.477112000 | -2.438376000 | 0.639411000  |
| H | -3.376784000 | -3.016740000 | -0.283105000 |
| H | -2.602370000 | -2.660937000 | 1.257885000  |
| H | -4.389153000 | -2.759393000 | 1.154728000  |

14

**M06-L/BSI SCF energy in gas:** -2412.160878 a.u.

**M06/BSII SCF energy in benzene:** -2411.625614 a.u.

**M06/BSII//M06-L/BSI free energy in benzene:** -2410.912677 a.u.

**M06/BSII//M06-L/BSI entalphy in benzene:** -2410.784624 a.u.

|    |              |              |              |
|----|--------------|--------------|--------------|
| Pd | 2.531919000  | -0.403467000 | -1.253250000 |
| B  | -0.838078000 | -1.054724000 | 1.450930000  |
| B  | -1.330386000 | 1.734524000  | 0.538646000  |
| O  | -0.550032000 | -2.294893000 | 1.967087000  |
| O  | 0.126583000  | -0.115265000 | 1.747034000  |

|   |              |              |              |
|---|--------------|--------------|--------------|
| O | -0.529622000 | 2.147313000  | -0.498781000 |
| O | -1.271071000 | 2.550666000  | 1.637662000  |
| C | -2.139681000 | -0.719092000 | 0.675472000  |
| C | -2.375935000 | 0.581052000  | 0.330130000  |
| C | 0.787518000  | -2.221391000 | 2.530309000  |
| C | 0.949250000  | -0.693161000 | 2.795635000  |
| C | 0.304655000  | 3.222778000  | 0.009011000  |
| C | -0.513572000 | 3.724188000  | 1.245731000  |
| C | -3.638314000 | 1.059547000  | -0.282549000 |
| C | -3.613241000 | 2.004737000  | -1.321934000 |
| C | -4.889380000 | 0.640219000  | 0.199173000  |
| H | -2.652593000 | 2.345877000  | -1.702951000 |
| H | -4.926738000 | -0.076122000 | 1.015583000  |
| C | -4.794495000 | 2.484306000  | -1.880146000 |
| C | -6.066153000 | 1.132620000  | -0.348158000 |
| H | -4.750904000 | 3.202386000  | -2.695070000 |
| H | -7.022223000 | 0.798115000  | 0.045631000  |
| C | -6.025274000 | 2.051846000  | -1.395828000 |
| H | -6.947836000 | 2.432972000  | -1.825049000 |
| C | -3.052982000 | -1.836021000 | 0.331134000  |
| C | -3.567797000 | -1.979034000 | -0.967213000 |
| C | -3.381944000 | -2.814793000 | 1.279551000  |
| H | -3.310913000 | -1.237033000 | -1.720686000 |
| H | -2.975380000 | -2.734936000 | 2.283585000  |
| C | -4.389403000 | -3.049136000 | -1.299226000 |



|   |              |              |              |
|---|--------------|--------------|--------------|
| C | -4.214242000 | -3.880114000 | 0.951199000  |
| H | -4.771273000 | -3.140044000 | -2.312955000 |
| H | -4.461923000 | -4.621346000 | 1.706840000  |
| C | -4.721658000 | -4.002948000 | -0.339099000 |
| H | -5.364801000 | -4.839685000 | -0.598103000 |
| C | 0.483912000  | 4.243058000  | -1.096648000 |
| H | 1.034395000  | 3.789406000  | -1.925862000 |
| H | -0.473480000 | 4.601945000  | -1.481154000 |
| H | 1.058757000  | 5.105210000  | -0.741061000 |
| C | 1.636451000  | 2.597972000  | 0.383565000  |
| H | 1.493050000  | 1.828582000  | 1.145222000  |
| H | 2.063593000  | 2.094771000  | -0.494723000 |
| H | 2.349398000  | 3.345342000  | 0.748825000  |
| C | -1.535332000 | 4.795181000  | 0.890332000  |
| H | -1.055710000 | 5.741743000  | 0.622067000  |
| H | -2.164972000 | 4.477538000  | 0.052976000  |
| H | -2.188017000 | 4.970289000  | 1.749188000  |
| C | 0.332516000  | 4.162356000  | 2.424107000  |
| H | -0.311072000 | 4.478010000  | 3.249615000  |
| H | 0.969422000  | 3.349759000  | 2.781898000  |
| H | 0.972608000  | 5.008560000  | 2.151915000  |
| C | 2.369405000  | -0.187236000 | 2.657487000  |
| H | 3.044345000  | -0.756421000 | 3.307461000  |
| H | 2.708476000  | -0.276546000 | 1.617958000  |
| H | 2.434400000  | 0.864996000  | 2.953274000  |

|   |              |              |              |
|---|--------------|--------------|--------------|
| C | 0.336154000  | -0.243316000 | 4.114691000  |
| H | 0.256587000  | 0.847385000  | 4.114464000  |
| H | -0.671620000 | -0.650007000 | 4.243212000  |
| H | 0.943730000  | -0.550552000 | 4.971601000  |
| C | 1.750614000  | -2.743576000 | 1.475544000  |
| H | 2.769778000  | -2.817984000 | 1.869791000  |
| H | 1.433566000  | -3.741680000 | 1.160808000  |
| H | 1.781519000  | -2.092300000 | 0.587774000  |
| C | 0.833675000  | -3.082844000 | 3.775684000  |
| H | 0.046399000  | -2.815270000 | 4.483386000  |
| H | 0.705354000  | -4.134912000 | 3.508063000  |
| H | 1.800945000  | -2.980143000 | 4.279305000  |
| P | 0.740548000  | -1.190188000 | -2.476523000 |
| P | 4.664731000  | -0.004554000 | -0.527493000 |
| C | 5.949237000  | 0.116943000  | -1.836798000 |
| H | 6.946988000  | 0.279582000  | -1.412467000 |
| H | 5.958683000  | -0.800985000 | -2.428689000 |
| H | 5.711162000  | 0.943102000  | -2.510760000 |
| C | 5.436226000  | -1.268218000 | 0.567090000  |
| H | 6.480423000  | -1.025559000 | 0.795753000  |
| H | 4.878119000  | -1.333606000 | 1.505622000  |
| H | 5.394853000  | -2.249348000 | 0.087660000  |
| C | 5.056126000  | 1.515427000  | 0.438478000  |
| H | 6.122344000  | 1.578564000  | 0.685420000  |
| H | 4.771645000  | 2.402058000  | -0.134185000 |

|   |              |              |              |
|---|--------------|--------------|--------------|
| H | 4.479126000  | 1.523284000  | 1.367781000  |
| C | 1.214098000  | -1.738311000 | -4.167474000 |
| H | 2.003451000  | -2.490850000 | -4.104019000 |
| H | 0.358834000  | -2.161263000 | -4.707825000 |
| H | 1.607144000  | -0.891282000 | -4.734714000 |
| C | -0.082229000 | -2.717007000 | -1.866878000 |
| H | -0.509231000 | -2.557652000 | -0.872525000 |
| H | -0.884472000 | -3.042943000 | -2.539134000 |
| H | 0.659055000  | -3.516386000 | -1.781605000 |
| C | -0.716502000 | -0.145324000 | -2.872127000 |
| H | -0.390945000 | 0.790788000  | -3.333381000 |
| H | -1.405100000 | -0.664380000 | -3.549635000 |
| H | -1.241196000 | 0.113775000  | -1.949754000 |

## **TSER2**

Imaginary Frequency: -103.33

**M06-L/BSI SCF energy in gas: -2412.117684 a.u.**

**M06/BSII SCF energy in benzene: -2411.58070 a.u.**

**M06/BSII//M06-L/BSI free energy in benzene: -2410.870923 a.u.**

**M06/BSII//M06-L/BSI entalphy in benzene: -2410.742032 a.u.**

|    |              |              |              |
|----|--------------|--------------|--------------|
| Pd | 1.523782000  | -0.712015000 | -0.515703000 |
| B  | 1.582567000  | 1.156795000  | 0.357593000  |
| B  | -2.789262000 | 0.054854000  | 0.412230000  |
| O  | 1.606558000  | 1.434490000  | 1.726531000  |
| O  | 2.002432000  | 2.264537000  | -0.371783000 |
| O  | -3.547354000 | -0.591759000 | -0.538990000 |

|   |              |              |              |
|---|--------------|--------------|--------------|
| O | -3.549341000 | 0.823437000  | 1.264012000  |
| C | -0.306733000 | 0.390867000  | -0.224396000 |
| C | -1.250878000 | -0.195008000 | 0.580296000  |
| C | 2.243824000  | 2.717603000  | 1.916857000  |
| C | 2.053835000  | 3.399323000  | 0.525003000  |
| C | -4.902944000 | -0.083697000 | -0.443828000 |
| C | -4.942163000 | 0.522342000  | 1.000330000  |
| C | -0.941992000 | -1.281673000 | 1.537259000  |
| C | 0.261473000  | -1.369691000 | 2.264545000  |
| C | -1.883368000 | -2.311605000 | 1.729129000  |
| H | 0.988852000  | -0.569769000 | 2.184731000  |
| H | -2.815736000 | -2.286009000 | 1.165830000  |
| C | 0.507654000  | -2.439608000 | 3.116916000  |
| C | -1.634162000 | -3.384827000 | 2.580569000  |
| H | 1.440638000  | -2.469899000 | 3.676023000  |
| H | -2.381414000 | -4.166399000 | 2.693810000  |
| C | -0.432540000 | -3.457782000 | 3.278790000  |
| H | -0.233762000 | -4.290797000 | 3.947898000  |
| C | -0.733216000 | 1.354912000  | -1.260520000 |
| C | -1.728569000 | 2.324113000  | -1.049245000 |
| C | -0.103745000 | 1.341002000  | -2.517765000 |
| H | -2.191509000 | 2.408055000  | -0.067644000 |
| H | 0.705014000  | 0.624273000  | -2.672175000 |
| C | -2.097021000 | 3.212622000  | -2.055920000 |
| C | -0.479976000 | 2.215111000  | -3.528001000 |

|   |              |              |              |
|---|--------------|--------------|--------------|
| H | -2.863265000 | 3.959440000  | -1.857345000 |
| H | 0.020341000  | 2.172241000  | -4.492529000 |
| C | -1.482298000 | 3.159169000  | -3.303597000 |
| H | -1.767535000 | 3.855499000  | -4.087751000 |
| C | -5.860493000 | -1.237071000 | -0.671164000 |
| H | -5.751386000 | -1.614969000 | -1.691155000 |
| H | -5.669830000 | -2.063314000 | 0.017160000  |
| H | -6.898777000 | -0.912567000 | -0.541527000 |
| C | -5.061029000 | 0.958962000  | -1.538674000 |
| H | -4.366643000 | 1.790570000  | -1.396717000 |
| H | -4.831655000 | 0.503544000  | -2.505563000 |
| H | -6.081021000 | 1.354124000  | -1.575076000 |
| C | -5.376932000 | -0.477098000 | 2.062920000  |
| H | -6.436273000 | -0.735466000 | 1.969057000  |
| H | -4.789776000 | -1.398746000 | 2.008582000  |
| H | -5.214352000 | -0.041461000 | 3.051733000  |
| C | -5.743682000 | 1.803323000  | 1.123874000  |
| H | -5.704163000 | 2.170682000  | 2.152654000  |
| H | -5.352909000 | 2.586362000  | 0.470310000  |
| H | -6.794797000 | 1.631976000  | 0.867097000  |
| C | 3.196274000  | 4.298039000  | 0.095260000  |
| H | 3.324672000  | 5.131184000  | 0.795365000  |
| H | 4.140280000  | 3.750826000  | 0.035445000  |
| H | 2.987660000  | 4.718111000  | -0.892316000 |
| C | 0.727316000  | 4.133909000  | 0.406750000  |

|   |              |              |              |
|---|--------------|--------------|--------------|
| H | 0.538240000  | 4.372148000  | -0.643820000 |
| H | -0.100073000 | 3.508820000  | 0.753738000  |
| H | 0.726260000  | 5.063961000  | 0.984897000  |
| C | 3.704477000  | 2.453949000  | 2.258526000  |
| H | 4.246837000  | 3.379738000  | 2.475647000  |
| H | 3.757551000  | 1.813919000  | 3.144091000  |
| H | 4.219329000  | 1.940900000  | 1.439969000  |
| C | 1.563553000  | 3.430398000  | 3.070056000  |
| H | 0.484881000  | 3.497002000  | 2.919714000  |
| H | 1.739528000  | 2.887426000  | 4.002828000  |
| H | 1.961098000  | 4.444315000  | 3.191583000  |
| P | 0.576445000  | -2.712556000 | -1.524199000 |
| C | -1.198720000 | -2.639681000 | -1.966643000 |
| H | -1.382413000 | -1.803456000 | -2.646862000 |
| H | -1.540461000 | -3.569657000 | -2.434482000 |
| H | 0.171208000  | -5.080283000 | -0.967466000 |
| H | -1.794322000 | -2.452500000 | -1.069808000 |
| C | 0.614407000  | -4.211898000 | -0.466779000 |
| H | 1.645172000  | -4.450532000 | -0.189438000 |
| H | 0.060548000  | -4.011116000 | 0.455624000  |
| H | 2.353353000  | -3.598452000 | -2.941233000 |
| C | 1.298061000  | -3.353725000 | -3.088818000 |
| H | 1.238968000  | -2.583655000 | -3.862877000 |
| H | 0.776491000  | -4.249344000 | -3.444512000 |
| P | 3.788665000  | -1.055034000 | -0.345613000 |

|   |             |              |              |
|---|-------------|--------------|--------------|
| C | 4.862031000 | 0.303443000  | -0.951352000 |
| H | 4.468425000 | 1.262139000  | -0.604358000 |
| H | 5.903171000 | 0.185424000  | -0.631370000 |
| H | 5.708165000 | -2.520884000 | -0.863561000 |
| H | 4.829204000 | 0.324437000  | -2.043821000 |
| C | 4.640098000 | -2.498256000 | -1.107442000 |
| H | 4.182663000 | -3.428273000 | -0.758551000 |
| H | 4.533631000 | -2.458621000 | -2.194915000 |
| H | 3.874326000 | -2.154362000 | 1.809024000  |
| C | 4.315434000 | -1.239685000 | 1.401957000  |
| H | 3.927596000 | -0.400856000 | 1.986580000  |
| H | 5.404613000 | -1.289764000 | 1.510358000  |

## REFERENCES

- 1) Gaussian 09, Revision D.01, Frisch, M. J.; Trucks, G. W.; Schlegel, H. B.; Scuseria, G. E.; Robb, M. A.; Cheeseman, J. R.; Scalmani, G.; Barone, V.; Mennucci, B.; Petersson, G. A.; Nakatsuji, H.; Caricato, M.; Li, X.; Hratchian, H. P.; Izmaylov, A. F.; Bloino, J.; Zheng, G.; Sonnenberg, J. L.; Hada, M.; Ehara, M.; Toyota, K.; Fukuda, R.; Hasegawa, J.; Ishida, M.; Nakajima, T.; Honda, Y.; Kitao, O.; Nakai, H.; Vreven, T.; Montgomery, J. A., Jr.; Peralta, J. E.; Ogliaro, F.; Bearpark, M.; Heyd, J. J.; Brothers, E.; Kudin, K. N.; Staroverov, V. N.; Kobayashi, R.; Normand, J.; Raghavachari, K.; Rendell, A.; Burant, J. C.; Iyengar, S. S.; Tomasi, J.; Cossi, M.; Rega, N.; Millam, J. M.; Klene, M.; Knox, J. E.; Cross, J. B.; Bakken, V.; Adamo, C.; Jaramillo, J.; Gomperts, R.; Stratmann, R. E.; Yazyev, O.; Austin, A. J.; Cammi, R.; Pomelli, C.; Ochterski, J. W.; Martin, R. L.; Morokuma, K.; Zakrzewski, V. G.; Voth, G. A.; Salvador, P.; Dannenberg, J. J.; Dapprich, S.; Daniels, A. D.; Farkas, Ö.; Foresman, J. B.; Ortiz, J. V.; Cioslowski, J.; Fox, D. J. Gaussian, Inc., Wallingford CT, 2009.
- 2) Zhao, Y.; Truhlar, D. G. *J. Chem. Phys.* 2006, *125*, 194101-194118.
- 3) Andrae, D.; Häußermann, U.; Dolg, M.; Stoll, H.; Preuß, H. *Theor. Chim. Acta* 1990, *77*, 123-141.
- 4) Hratchian, H. P.; Schlegel, H. B. *J. Chem. Theory Comp.* 2005, *1*, 61-69.
- 5) Marenich, A. V.; Cramer, C. J.; Truhlar, D. G. *J. Phys. Chem. B* 2009, *113*, 6378-6396.
- 6) Zhao, Y.; Truhlar, D. G. *Theor. Chem. Acc.* 2008, *120*, 215-241.
- 7) Weigend, F.; Ahlrichs, R. *Phys. Chem. Chem. Phys.* 2005, *7*, 3297-3305.

- 8) Boeser, C. L.; Holder, J. C.; Taylor, B. L. H.; Houk, K. N.; Stoltz, B. M.; Zare, R. N. *Chem. Sci.* 2015, 6, 1917.
- 9) Ansell, M. B.; Roberts, D. E.; Cloke, F. G. N.; Navarro, O.; Spencer, J. *Angew. Chem. Int. Ed.* **2015**, 54, 5578-5582.
- 10) Diboration of alkynes, mechanistic studies: a) Iverson, C. N.; Smith, M. R., III. *Organometallics* 1996, 15, 5155-5165. b) Cui, Q.; Musaev, D. G.; Morokuma, K. *Organometallics* 1997, 16, 1355-1364.
- 11) Yoshida, H.; Okada, K.; Kawashima, S.; Tanino, K.; Ohshita, J. *Chem. Commun.* 2010, 46, 1763.
- 12) Hartmann, E.; Vyas, D. J.; Oestreich, M. *Chem. Commun.* 2011, 47, 7917.
- 13) Hall, D. G., Ed. *Boronic Acids-Preparation, Applications in Organic Synthesis and Medicine*; Wiley-VCH: Weinheim, Germany, 2005.
- 14) Nagashima, Y.; Hirano, K.; Takita, R.; Uchiyama, M. *J. Am. Chem. Soc.*, 2014, 136, 8532–8535.
- 15) Liu, B.; Gao, M.; Dang, L.; Zhao, H.; Marder, T. B.; Lin, Z. *Organometallics*, 2012, 31, 3410–3425.
- 16) Xie, H.; Sun, Q.; Ren, G.; Cao, Z. *J. Org. Chem.*, 2014, 79, 11911–11921.
